# Supplementary material
Source: HighWire-hosted journal article supplement (doi:10.1101/rna.076992.120)
Supplement: Supplemental_Legends.docx [file Supplemental_Legends.docx]

**Supplemental material**

**Supplemental Fig. S1. GradR protein and RNA distribution.** (A), (B), A260 profile, protein and RNA patterns in reference and +RNase gradients were resolved in SDS-PAGE and 6% Urea-PAGE.

**Supplemental Fig. S2. GradR protein and RNA distribution.** (A) Protein abundance normalization and calculation of shift and distribution changes for RpsB (30S) and RpoB (RNAP). (B) Total protein levels in reference and +RNase gradients were similar (5-fold difference in abundance is in the green boundary) (C) Relative position calculated for both gradients dependent on the protein amount in each fraction. Ribosomal proteins accumulate in HMW fractions. Ribosomal small and large subunits can be discriminated by a shift of 4 or 2 relative fractions, respectively. The majority of the proteins allocated in the first gradient half. (D) Not all proteins that are classified as *RNA-binding* (red) are shifting, a majority is allocating around 0 shifting relative fractions. (E) For example, the cold-shock proteins are shifting only marginally. (F) Correlation of reference gradient with Grad-seq. Ribosome dissociate in Grad-seq, hence the correlation is diminished in ribosomal subunit fractions. (G)  During development of GradR, we performed an initial experimental replicate 0 with modified conditions: the lysis buffer contained 0.2% Triton X100 as in Grad-seq (Smirnov et al. 2016). The protein samples were prepared for MS detection by acetone precipitation and solubilized directly in digestion buffer with 8 M urea. All other steps were performed as stated before for replicate 1. GradR replicates with 0.2% Triton X100 (repl. 0) and without (repl. 1) correlated well. (H) Fraction-wise correlation coefficient in (G) was about 0.8 in fractions with high protein load. (I) Distribution of correlation coefficients of sedimentation profiles across replicate experiments in (G,H) shows that the majority of (non-shifting) proteins were highly correlated.

**Supplemental Fig. S3. Ribosome associated proteins enrich at ribosomal fractions after RNase digestion.** Proteins that shifted towards fractions 10 to 20 are represented. Transiently associated ribosomal protein are indicated in bold type. Other proteins represent novel ribosome-associated candidates, among them six are fully uncharacterized and named by UniProt-ID.

**Supplemental Fig. S4. ProQ protein levels.** (A) ProQ levels in *E. coli* and *S. enterica* were in the same range. (B) Motif-based sequence analysis (MEME) did not yield a significant sequence motif that would match the top recovered targets in Fig. 5B,C. (C) Read-covered sequences of precipitated RNAs by FopA were submitted to GLASSgo (Lott et al. 2018) for RNA homolog search. The resulting sequences were aligned for calculation of phylogenetic distances by Clustal Omega (EMBL) and visualized with FigTree (1.4.4, Rambaut A, University of Edinburgh).

**Supplemental Fig. S5. FopA purification.** (A) General purification procedure for FopA. (B), Immobilized metal-affinity chromatography (IMAC) captured His-tagged H6-3C-FopA. The N-terminal His-tag was cleaved off by 3C protease and removed by reverse-IMAC. In a cation-exchange chromatography (CIEX) at pH 6.0, FopA eluted in RNA-free form at 0.6 M NaCl. (C) In size-exclusion chromatography, FopA eluted as a monomer with a 280/254 nm absorption ratio of 1.6.

**Supplemental Fig. S6.** **GradR is an orthogonal RBP discovery method to UV-crosslinking based approaches.** (A) Phenol-Toluol-based extraction of RPBs (PTex, (Urdaneta et al. 2019)) predicted 24 shared candidates of which 15 were GO-term annotated as RBPs. (B) Silica-based recovery of RNA-RBP candidates (TRAPP, (Shchepachev et al. 2019)) yielded 42 matching candidates of which 28 were GO-term annotated as RBPs. The correlations between the here listed methods were only minor and indicate orthogonality. Candidate numbers are based on applied thresholds in the individual studies. *Salmonella* and *E. coli* RBP candidates from GradR and TRAPP were matched by gene name if applicable.

**Supplemental Fig. S7.** **A number of virulence factors shifted whereas metabolic protein sedimentation was not affected by RNase treatment.** (A) Virulence factors were grouped as encoded in *Salmonella* pathogenicity islands (SPI). A number of factors that shifted after RNase treatment are represented in bold. (B) Aconitase and enzymes from the TCA cycle were not shifting upon RNase treatment. (C) A global analysis of metabolic proteins based on KEGG categories yielded no general shifting behaviour.

**Supplemental Table S1 I List of sedimentation profiles for detected proteins.**

Supplemental_TableS1_GradR_data_with_analysis_pipeline.xlsx

**Supplemental Table S2 I coIP-seq results of FopA at OD2.**

Supplemental_TableS2_FopA_coIP-seq.xlsx

**Supplemental Table S3 I STAR Methods: oligonucleotides, plasmids, and strains used in the study.**

Supplemental_TableS3_STAR_methods.xlsx

**Supplemental Table S4 I Classifications used in this study.**

Supplemental_TableS4_classficiation_lists.xlsx
