# Supplementary material
Source: HighWire-hosted journal article supplement (doi:10.1101/rna.076992.120)
Supplement: Supplemental_Table_S1.xlsx [file Supplemental_Table_S1.xlsx]

## Sheet: labeling
RAW_MS_DATA No848			RELEVANT_DATA WITH CALCS
Protein IDs			UniprotID	Protein ID at uniprot.org
Majority protein IDs			unique peptides	how many unique peptides were detected
Peptide counts (all)			locus	the locus in Salmonella SL1344_????
Peptide counts (razor+unique)			gene	gene name (not italic)
Peptide counts (unique)			protein	protein name
Fasta headers			Pfam	Pfam annotation 32.0
Number of proteins			Mass	protein mass in kDa
Peptides			GO-term	Gene Onthology terms with IDs
Razor + unique peptides			class easy	classification red. to RNA-/DNA-binding/other (this work)
Unique peptides			class	classification (this work)
Peptides 848_Gradient1_01			iBAQ fraction 1	iBAQ value determined by MaxQuant for individual fraction
Peptides 848_Gradient1_02			iBAQ fraction 2	iBAQ value determined by MaxQuant for individual fraction
Peptides 848_Gradient1_03			iBAQ fraction 3	iBAQ value determined by MaxQuant for individual fraction
Peptides 848_Gradient1_04			iBAQ fraction 4	iBAQ value determined by MaxQuant for individual fraction
Peptides 848_Gradient1_05			iBAQ fraction 5	iBAQ value determined by MaxQuant for individual fraction
Peptides 848_Gradient1_06			iBAQ fraction 6	iBAQ value determined by MaxQuant for individual fraction
Peptides 848_Gradient1_07			iBAQ fraction 7	iBAQ value determined by MaxQuant for individual fraction
Peptides 848_Gradient1_08			iBAQ fraction 8	iBAQ value determined by MaxQuant for individual fraction
Peptides 848_Gradient1_09			iBAQ fraction 9	iBAQ value determined by MaxQuant for individual fraction
Peptides 848_Gradient1_10			iBAQ fraction 10	iBAQ value determined by MaxQuant for individual fraction
Peptides 848_Gradient1_11			iBAQ fraction 11	iBAQ value determined by MaxQuant for individual fraction
Peptides 848_Gradient1_12			iBAQ fraction 12	iBAQ value determined by MaxQuant for individual fraction
Peptides 848_Gradient1_13			iBAQ fraction 13	iBAQ value determined by MaxQuant for individual fraction
Peptides 848_Gradient1_14			iBAQ fraction 14	iBAQ value determined by MaxQuant for individual fraction
Peptides 848_Gradient1_15			iBAQ fraction 15	iBAQ value determined by MaxQuant for individual fraction
Peptides 848_Gradient1_16			iBAQ fraction 16	iBAQ value determined by MaxQuant for individual fraction
Peptides 848_Gradient1_17			iBAQ fraction 17	iBAQ value determined by MaxQuant for individual fraction
Peptides 848_Gradient1_18			iBAQ fraction 18	iBAQ value determined by MaxQuant for individual fraction
Peptides 848_Gradient1_19			iBAQ fraction 19	iBAQ value determined by MaxQuant for individual fraction
Peptides 848_Gradient1_20			iBAQ fraction 20	iBAQ value determined by MaxQuant for individual fraction
Peptides 848_Gradient1_Pellet			iBAQ fraction P	iBAQ value determined by MaxQuant for individual fraction
Peptides 848_Gradient1_S			iBAQ fraction 1R	iBAQ value determined by MaxQuant for individual fraction
Peptides 848_Gradient2_R_01			iBAQ fraction 2R	iBAQ value determined by MaxQuant for individual fraction
Peptides 848_Gradient2_R_02			iBAQ fraction 3R	iBAQ value determined by MaxQuant for individual fraction
Peptides 848_Gradient2_R_03			iBAQ fraction 4R	iBAQ value determined by MaxQuant for individual fraction
Peptides 848_Gradient2_R_04			iBAQ fraction 5R	iBAQ value determined by MaxQuant for individual fraction
Peptides 848_Gradient2_R_05			iBAQ fraction 6R	iBAQ value determined by MaxQuant for individual fraction
Peptides 848_Gradient2_R_06			iBAQ fraction 7R	iBAQ value determined by MaxQuant for individual fraction
Peptides 848_Gradient2_R_07			iBAQ fraction 8R	iBAQ value determined by MaxQuant for individual fraction
Peptides 848_Gradient2_R_08			iBAQ fraction 9R	iBAQ value determined by MaxQuant for individual fraction
Peptides 848_Gradient2_R_09			iBAQ fraction 10R	iBAQ value determined by MaxQuant for individual fraction
Peptides 848_Gradient2_R_10			iBAQ fraction 11R	iBAQ value determined by MaxQuant for individual fraction
Peptides 848_Gradient2_R_11			iBAQ fraction 12R	iBAQ value determined by MaxQuant for individual fraction
Peptides 848_Gradient2_R_12			iBAQ fraction 13R	iBAQ value determined by MaxQuant for individual fraction
Peptides 848_Gradient2_R_13			iBAQ fraction 14R	iBAQ value determined by MaxQuant for individual fraction
Peptides 848_Gradient2_R_14			iBAQ fraction 15R	iBAQ value determined by MaxQuant for individual fraction
Peptides 848_Gradient2_R_15			iBAQ fraction 16R	iBAQ value determined by MaxQuant for individual fraction
Peptides 848_Gradient2_R_16			iBAQ fraction 17R	iBAQ value determined by MaxQuant for individual fraction
Peptides 848_Gradient2_R_17			iBAQ fraction 18R	iBAQ value determined by MaxQuant for individual fraction
Peptides 848_Gradient2_R_18			iBAQ fraction 19R	iBAQ value determined by MaxQuant for individual fraction
Peptides 848_Gradient2_R_19			iBAQ fraction 20R	iBAQ value determined by MaxQuant for individual fraction
Peptides 848_Gradient2_R_20			iBAQ fraction PR	iBAQ value determined by MaxQuant for individual fraction
Peptides 848_Gradient2_R_Pellet			corrected_iBAQ fraction 1	corrected iBAQ value based on ALBU_HUMAN UPS2-spike-in for individual fraction
Peptides 848_Gradient2_R_S			corrected_iBAQ fraction 2	corrected iBAQ value based on ALBU_HUMAN UPS2-spike-in for individual fraction
Razor + unique peptides 848_Gradient1_01			corrected_iBAQ fraction 3	corrected iBAQ value based on ALBU_HUMAN UPS2-spike-in for individual fraction
Razor + unique peptides 848_Gradient1_02			corrected_iBAQ fraction 4	corrected iBAQ value based on ALBU_HUMAN UPS2-spike-in for individual fraction
Razor + unique peptides 848_Gradient1_03			corrected_iBAQ fraction 5	corrected iBAQ value based on ALBU_HUMAN UPS2-spike-in for individual fraction
Razor + unique peptides 848_Gradient1_04			corrected_iBAQ fraction 6	corrected iBAQ value based on ALBU_HUMAN UPS2-spike-in for individual fraction
Razor + unique peptides 848_Gradient1_05			corrected_iBAQ fraction 7	corrected iBAQ value based on ALBU_HUMAN UPS2-spike-in for individual fraction
Razor + unique peptides 848_Gradient1_06			corrected_iBAQ fraction 8	corrected iBAQ value based on ALBU_HUMAN UPS2-spike-in for individual fraction
Razor + unique peptides 848_Gradient1_07			corrected_iBAQ fraction 9	corrected iBAQ value based on ALBU_HUMAN UPS2-spike-in for individual fraction
Razor + unique peptides 848_Gradient1_08			corrected_iBAQ fraction 10	corrected iBAQ value based on ALBU_HUMAN UPS2-spike-in for individual fraction
Razor + unique peptides 848_Gradient1_09			corrected_iBAQ fraction 11	corrected iBAQ value based on ALBU_HUMAN UPS2-spike-in for individual fraction
Razor + unique peptides 848_Gradient1_10			corrected_iBAQ fraction 12	corrected iBAQ value based on ALBU_HUMAN UPS2-spike-in for individual fraction
Razor + unique peptides 848_Gradient1_11			corrected_iBAQ fraction 13	corrected iBAQ value based on ALBU_HUMAN UPS2-spike-in for individual fraction
Razor + unique peptides 848_Gradient1_12			corrected_iBAQ fraction 14	corrected iBAQ value based on ALBU_HUMAN UPS2-spike-in for individual fraction
Razor + unique peptides 848_Gradient1_13			corrected_iBAQ fraction 15	corrected iBAQ value based on ALBU_HUMAN UPS2-spike-in for individual fraction
Razor + unique peptides 848_Gradient1_14			corrected_iBAQ fraction 16	corrected iBAQ value based on ALBU_HUMAN UPS2-spike-in for individual fraction
Razor + unique peptides 848_Gradient1_15			corrected_iBAQ fraction 17	corrected iBAQ value based on ALBU_HUMAN UPS2-spike-in for individual fraction
Razor + unique peptides 848_Gradient1_16			corrected_iBAQ fraction 18	corrected iBAQ value based on ALBU_HUMAN UPS2-spike-in for individual fraction
Razor + unique peptides 848_Gradient1_17			corrected_iBAQ fraction 19	corrected iBAQ value based on ALBU_HUMAN UPS2-spike-in for individual fraction
Razor + unique peptides 848_Gradient1_18			corrected_iBAQ fraction 20	corrected iBAQ value based on ALBU_HUMAN UPS2-spike-in for individual fraction
Razor + unique peptides 848_Gradient1_19			corrected_iBAQ fraction P	corrected iBAQ value based on ALBU_HUMAN UPS2-spike-in for individual fraction
Razor + unique peptides 848_Gradient1_20			corrected_iBAQ fraction 1R	corrected iBAQ value based on ALBU_HUMAN UPS2-spike-in for individual fraction
Razor + unique peptides 848_Gradient1_Pellet			corrected_iBAQ fraction 2R	corrected iBAQ value based on ALBU_HUMAN UPS2-spike-in for individual fraction
Razor + unique peptides 848_Gradient1_S			corrected_iBAQ fraction 3R	corrected iBAQ value based on ALBU_HUMAN UPS2-spike-in for individual fraction
Razor + unique peptides 848_Gradient2_R_01			corrected_iBAQ fraction 4R	corrected iBAQ value based on ALBU_HUMAN UPS2-spike-in for individual fraction
Razor + unique peptides 848_Gradient2_R_02			corrected_iBAQ fraction 5R	corrected iBAQ value based on ALBU_HUMAN UPS2-spike-in for individual fraction
Razor + unique peptides 848_Gradient2_R_03			corrected_iBAQ fraction 6R	corrected iBAQ value based on ALBU_HUMAN UPS2-spike-in for individual fraction
Razor + unique peptides 848_Gradient2_R_04			corrected_iBAQ fraction 7R	corrected iBAQ value based on ALBU_HUMAN UPS2-spike-in for individual fraction
Razor + unique peptides 848_Gradient2_R_05			corrected_iBAQ fraction 8R	corrected iBAQ value based on ALBU_HUMAN UPS2-spike-in for individual fraction
Razor + unique peptides 848_Gradient2_R_06			corrected_iBAQ fraction 9R	corrected iBAQ value based on ALBU_HUMAN UPS2-spike-in for individual fraction
Razor + unique peptides 848_Gradient2_R_07			corrected_iBAQ fraction 10R	corrected iBAQ value based on ALBU_HUMAN UPS2-spike-in for individual fraction
Razor + unique peptides 848_Gradient2_R_08			corrected_iBAQ fraction 11R	corrected iBAQ value based on ALBU_HUMAN UPS2-spike-in for individual fraction
Razor + unique peptides 848_Gradient2_R_09			corrected_iBAQ fraction 12R	corrected iBAQ value based on ALBU_HUMAN UPS2-spike-in for individual fraction
Razor + unique peptides 848_Gradient2_R_10			corrected_iBAQ fraction 13R	corrected iBAQ value based on ALBU_HUMAN UPS2-spike-in for individual fraction
Razor + unique peptides 848_Gradient2_R_11			corrected_iBAQ fraction 14R	corrected iBAQ value based on ALBU_HUMAN UPS2-spike-in for individual fraction
Razor + unique peptides 848_Gradient2_R_12			corrected_iBAQ fraction 15R	corrected iBAQ value based on ALBU_HUMAN UPS2-spike-in for individual fraction
Razor + unique peptides 848_Gradient2_R_13			corrected_iBAQ fraction 16R	corrected iBAQ value based on ALBU_HUMAN UPS2-spike-in for individual fraction
Razor + unique peptides 848_Gradient2_R_14			corrected_iBAQ fraction 17R	corrected iBAQ value based on ALBU_HUMAN UPS2-spike-in for individual fraction
Razor + unique peptides 848_Gradient2_R_15			corrected_iBAQ fraction 18R	corrected iBAQ value based on ALBU_HUMAN UPS2-spike-in for individual fraction
Razor + unique peptides 848_Gradient2_R_16			corrected_iBAQ fraction 19R	corrected iBAQ value based on ALBU_HUMAN UPS2-spike-in for individual fraction
Razor + unique peptides 848_Gradient2_R_17			corrected_iBAQ fraction 20R	corrected iBAQ value based on ALBU_HUMAN UPS2-spike-in for individual fraction
Razor + unique peptides 848_Gradient2_R_18			corrected_iBAQ fraction PR	corrected iBAQ value based on ALBU_HUMAN UPS2-spike-in for individual fraction
Razor + unique peptides 848_Gradient2_R_19			norm2grad_iBAQ fraction 1	fraction iBAQ value normalized for each protein to total level = 1 per gradient
Razor + unique peptides 848_Gradient2_R_20			norm2grad_iBAQ fraction 2	fraction iBAQ value normalized for each protein to total level = 1 per gradient
Razor + unique peptides 848_Gradient2_R_Pellet			norm2grad_iBAQ fraction 3	fraction iBAQ value normalized for each protein to total level = 1 per gradient
Razor + unique peptides 848_Gradient2_R_S			norm2grad_iBAQ fraction 4	fraction iBAQ value normalized for each protein to total level = 1 per gradient
Unique peptides 848_Gradient1_01			norm2grad_iBAQ fraction 5	fraction iBAQ value normalized for each protein to total level = 1 per gradient
Unique peptides 848_Gradient1_02			norm2grad_iBAQ fraction 6	fraction iBAQ value normalized for each protein to total level = 1 per gradient
Unique peptides 848_Gradient1_03			norm2grad_iBAQ fraction 7	fraction iBAQ value normalized for each protein to total level = 1 per gradient
Unique peptides 848_Gradient1_04			norm2grad_iBAQ fraction 8	fraction iBAQ value normalized for each protein to total level = 1 per gradient
Unique peptides 848_Gradient1_05			norm2grad_iBAQ fraction 9	fraction iBAQ value normalized for each protein to total level = 1 per gradient
Unique peptides 848_Gradient1_06			norm2grad_iBAQ fraction 10	fraction iBAQ value normalized for each protein to total level = 1 per gradient
Unique peptides 848_Gradient1_07			norm2grad_iBAQ fraction 11	fraction iBAQ value normalized for each protein to total level = 1 per gradient
Unique peptides 848_Gradient1_08			norm2grad_iBAQ fraction 12	fraction iBAQ value normalized for each protein to total level = 1 per gradient
Unique peptides 848_Gradient1_09			norm2grad_iBAQ fraction 13	fraction iBAQ value normalized for each protein to total level = 1 per gradient
Unique peptides 848_Gradient1_10			norm2grad_iBAQ fraction 14	fraction iBAQ value normalized for each protein to total level = 1 per gradient
Unique peptides 848_Gradient1_11			norm2grad_iBAQ fraction 15	fraction iBAQ value normalized for each protein to total level = 1 per gradient
Unique peptides 848_Gradient1_12			norm2grad_iBAQ fraction 16	fraction iBAQ value normalized for each protein to total level = 1 per gradient
Unique peptides 848_Gradient1_13			norm2grad_iBAQ fraction 17	fraction iBAQ value normalized for each protein to total level = 1 per gradient
Unique peptides 848_Gradient1_14			norm2grad_iBAQ fraction 18	fraction iBAQ value normalized for each protein to total level = 1 per gradient
Unique peptides 848_Gradient1_15			norm2grad_iBAQ fraction 19	fraction iBAQ value normalized for each protein to total level = 1 per gradient
Unique peptides 848_Gradient1_16			norm2grad_iBAQ fraction 20	fraction iBAQ value normalized for each protein to total level = 1 per gradient
Unique peptides 848_Gradient1_17			norm2grad_iBAQ fraction P	fraction iBAQ value normalized for each protein to total level = 1 per gradient
Unique peptides 848_Gradient1_18			norm2grad_iBAQ fraction 1R	fraction iBAQ value normalized for each protein to total level = 1 per gradient
Unique peptides 848_Gradient1_19			norm2grad_iBAQ fraction 2R	fraction iBAQ value normalized for each protein to total level = 1 per gradient
Unique peptides 848_Gradient1_20			norm2grad_iBAQ fraction 3R	fraction iBAQ value normalized for each protein to total level = 1 per gradient
Unique peptides 848_Gradient1_Pellet			norm2grad_iBAQ fraction 4R	fraction iBAQ value normalized for each protein to total level = 1 per gradient
Unique peptides 848_Gradient1_S			norm2grad_iBAQ fraction 5R	fraction iBAQ value normalized for each protein to total level = 1 per gradient
Unique peptides 848_Gradient2_R_01			norm2grad_iBAQ fraction 6R	fraction iBAQ value normalized for each protein to total level = 1 per gradient
Unique peptides 848_Gradient2_R_02			norm2grad_iBAQ fraction 7R	fraction iBAQ value normalized for each protein to total level = 1 per gradient
Unique peptides 848_Gradient2_R_03			norm2grad_iBAQ fraction 8R	fraction iBAQ value normalized for each protein to total level = 1 per gradient
Unique peptides 848_Gradient2_R_04			norm2grad_iBAQ fraction 9R	fraction iBAQ value normalized for each protein to total level = 1 per gradient
Unique peptides 848_Gradient2_R_05			norm2grad_iBAQ fraction 10R	fraction iBAQ value normalized for each protein to total level = 1 per gradient
Unique peptides 848_Gradient2_R_06			norm2grad_iBAQ fraction 11R	fraction iBAQ value normalized for each protein to total level = 1 per gradient
Unique peptides 848_Gradient2_R_07			norm2grad_iBAQ fraction 12R	fraction iBAQ value normalized for each protein to total level = 1 per gradient
Unique peptides 848_Gradient2_R_08			norm2grad_iBAQ fraction 13R	fraction iBAQ value normalized for each protein to total level = 1 per gradient
Unique peptides 848_Gradient2_R_09			norm2grad_iBAQ fraction 14R	fraction iBAQ value normalized for each protein to total level = 1 per gradient
Unique peptides 848_Gradient2_R_10			norm2grad_iBAQ fraction 15R	fraction iBAQ value normalized for each protein to total level = 1 per gradient
Unique peptides 848_Gradient2_R_11			norm2grad_iBAQ fraction 16R	fraction iBAQ value normalized for each protein to total level = 1 per gradient
Unique peptides 848_Gradient2_R_12			norm2grad_iBAQ fraction 17R	fraction iBAQ value normalized for each protein to total level = 1 per gradient
Unique peptides 848_Gradient2_R_13			norm2grad_iBAQ fraction 18R	fraction iBAQ value normalized for each protein to total level = 1 per gradient
Unique peptides 848_Gradient2_R_14			norm2grad_iBAQ fraction 19R	fraction iBAQ value normalized for each protein to total level = 1 per gradient
Unique peptides 848_Gradient2_R_15			norm2grad_iBAQ fraction 20R	fraction iBAQ value normalized for each protein to total level = 1 per gradient
Unique peptides 848_Gradient2_R_16			norm2grad_iBAQ fraction PR	fraction iBAQ value normalized for each protein to total level = 1 per gradient
Unique peptides 848_Gradient2_R_17			d1	protein change upon RNase treatment based on norm2grad
Unique peptides 848_Gradient2_R_18			d2	protein change upon RNase treatment based on norm2grad
Unique peptides 848_Gradient2_R_19			d3	protein change upon RNase treatment based on norm2grad
Unique peptides 848_Gradient2_R_20			d4	protein change upon RNase treatment based on norm2grad
Unique peptides 848_Gradient2_R_Pellet			d5	protein change upon RNase treatment based on norm2grad
Unique peptides 848_Gradient2_R_S			d6	protein change upon RNase treatment based on norm2grad
Sequence coverage [%]			d7	protein change upon RNase treatment based on norm2grad
Unique + razor sequence coverage [%]			d8	protein change upon RNase treatment based on norm2grad
Unique sequence coverage [%]			d9	protein change upon RNase treatment based on norm2grad
Mol. weight [kDa]			d10	protein change upon RNase treatment based on norm2grad
Sequence length			d11	protein change upon RNase treatment based on norm2grad
Sequence lengths			d12	protein change upon RNase treatment based on norm2grad
Fraction average			d13	protein change upon RNase treatment based on norm2grad
Fraction 101			d14	protein change upon RNase treatment based on norm2grad
Fraction 102			d15	protein change upon RNase treatment based on norm2grad
Fraction 103			d16	protein change upon RNase treatment based on norm2grad
Fraction 104			d17	protein change upon RNase treatment based on norm2grad
Fraction 105			d18	protein change upon RNase treatment based on norm2grad
Fraction 106			d19	protein change upon RNase treatment based on norm2grad
Fraction 107			d20	protein change upon RNase treatment based on norm2grad
Fraction 108			dP	protein change upon RNase treatment based on norm2grad
Fraction 109			m1	protein change normalized to max. value
Fraction 110			m2	protein change normalized to max. value
Fraction 111			m3	protein change normalized to max. value
Fraction 112			m4	protein change normalized to max. value
Fraction 113			m5	protein change normalized to max. value
Fraction 114			m6	protein change normalized to max. value
Fraction 115			m7	protein change normalized to max. value
Fraction 116			m8	protein change normalized to max. value
Fraction 117			m9	protein change normalized to max. value
Fraction 118			m10	protein change normalized to max. value
Fraction 119			m11	protein change normalized to max. value
Fraction 120			m12	protein change normalized to max. value
Fraction 121			m13	protein change normalized to max. value
Fraction 150			m14	protein change normalized to max. value
Fraction 201			m15	protein change normalized to max. value
Fraction 202			m16	protein change normalized to max. value
Fraction 203			m17	protein change normalized to max. value
Fraction 204			m18	protein change normalized to max. value
Fraction 205			m19	protein change normalized to max. value
Fraction 206			m20	protein change normalized to max. value
Fraction 207			mP	protein change normalized to max. value
Fraction 208			Pearson correlation	correlation based on norm2grad of reference and +RNase gradients
Fraction 209			1	INTERNAL CALC, weighted protein abundancy per fraction position
Fraction 210			2	INTERNAL CALC, weighted protein abundancy per fraction position
Fraction 211			3	INTERNAL CALC, weighted protein abundancy per fraction position
Fraction 212			4	INTERNAL CALC, weighted protein abundancy per fraction position
Fraction 213			5	INTERNAL CALC, weighted protein abundancy per fraction position
Fraction 214			6	INTERNAL CALC, weighted protein abundancy per fraction position
Fraction 215			7	INTERNAL CALC, weighted protein abundancy per fraction position
Fraction 216			8	INTERNAL CALC, weighted protein abundancy per fraction position
Fraction 217			9	INTERNAL CALC, weighted protein abundancy per fraction position
Fraction 218			10	INTERNAL CALC, weighted protein abundancy per fraction position
Fraction 219			11	INTERNAL CALC, weighted protein abundancy per fraction position
Fraction 220			12	INTERNAL CALC, weighted protein abundancy per fraction position
Fraction 221			13	INTERNAL CALC, weighted protein abundancy per fraction position
Fraction 250			14	INTERNAL CALC, weighted protein abundancy per fraction position
Q-value			15	INTERNAL CALC, weighted protein abundancy per fraction position
Score			16	INTERNAL CALC, weighted protein abundancy per fraction position
Identification type 848_Gradient1_01			17	INTERNAL CALC, weighted protein abundancy per fraction position
Identification type 848_Gradient1_02			18	INTERNAL CALC, weighted protein abundancy per fraction position
Identification type 848_Gradient1_03			19	INTERNAL CALC, weighted protein abundancy per fraction position
Identification type 848_Gradient1_04			20	INTERNAL CALC, weighted protein abundancy per fraction position
Identification type 848_Gradient1_05			21	INTERNAL CALC, weighted protein abundancy per fraction position
Identification type 848_Gradient1_06			1	INTERNAL CALC, weighted protein abundancy per fraction position
Identification type 848_Gradient1_07			2	INTERNAL CALC, weighted protein abundancy per fraction position
Identification type 848_Gradient1_08			3	INTERNAL CALC, weighted protein abundancy per fraction position
Identification type 848_Gradient1_09			4	INTERNAL CALC, weighted protein abundancy per fraction position
Identification type 848_Gradient1_10			5	INTERNAL CALC, weighted protein abundancy per fraction position
Identification type 848_Gradient1_11			6	INTERNAL CALC, weighted protein abundancy per fraction position
Identification type 848_Gradient1_12			7	INTERNAL CALC, weighted protein abundancy per fraction position
Identification type 848_Gradient1_13			8	INTERNAL CALC, weighted protein abundancy per fraction position
Identification type 848_Gradient1_14			9	INTERNAL CALC, weighted protein abundancy per fraction position
Identification type 848_Gradient1_15			10	INTERNAL CALC, weighted protein abundancy per fraction position
Identification type 848_Gradient1_16			11	INTERNAL CALC, weighted protein abundancy per fraction position
Identification type 848_Gradient1_17			12	INTERNAL CALC, weighted protein abundancy per fraction position
Identification type 848_Gradient1_18			13	INTERNAL CALC, weighted protein abundancy per fraction position
Identification type 848_Gradient1_19			14	INTERNAL CALC, weighted protein abundancy per fraction position
Identification type 848_Gradient1_20			15	INTERNAL CALC, weighted protein abundancy per fraction position
Identification type 848_Gradient1_Pellet			16	INTERNAL CALC, weighted protein abundancy per fraction position
Identification type 848_Gradient1_S			17	INTERNAL CALC, weighted protein abundancy per fraction position
Identification type 848_Gradient2_R_01			18	INTERNAL CALC, weighted protein abundancy per fraction position
Identification type 848_Gradient2_R_02			19	INTERNAL CALC, weighted protein abundancy per fraction position
Identification type 848_Gradient2_R_03			20	INTERNAL CALC, weighted protein abundancy per fraction position
Identification type 848_Gradient2_R_04			21	INTERNAL CALC, weighted protein abundancy per fraction position
Identification type 848_Gradient2_R_05			position ref	sum of weighted protein abundancy per fraction results in relative position in reference gradient
Identification type 848_Gradient2_R_06			position +RNase	sum of weighted protein abundancy per fraction results in relative position in +RNase gradient
Identification type 848_Gradient2_R_07			shift	calculated shift based on rel. positions in reference and +RNase gradients
Identification type 848_Gradient2_R_08			1	INTERNAL CALC, presence at threshold >0.025
Identification type 848_Gradient2_R_09			2	INTERNAL CALC, presence at threshold >0.025
Identification type 848_Gradient2_R_10			3	INTERNAL CALC, presence at threshold >0.025
Identification type 848_Gradient2_R_11			4	INTERNAL CALC, presence at threshold >0.025
Identification type 848_Gradient2_R_12			5	INTERNAL CALC, presence at threshold >0.025
Identification type 848_Gradient2_R_13			6	INTERNAL CALC, presence at threshold >0.025
Identification type 848_Gradient2_R_14			7	INTERNAL CALC, presence at threshold >0.025
Identification type 848_Gradient2_R_15			8	INTERNAL CALC, presence at threshold >0.025
Identification type 848_Gradient2_R_16			9	INTERNAL CALC, presence at threshold >0.025
Identification type 848_Gradient2_R_17			10	INTERNAL CALC, presence at threshold >0.025
Identification type 848_Gradient2_R_18			11	INTERNAL CALC, presence at threshold >0.025
Identification type 848_Gradient2_R_19			12	INTERNAL CALC, presence at threshold >0.025
Identification type 848_Gradient2_R_20			13	INTERNAL CALC, presence at threshold >0.025
Identification type 848_Gradient2_R_Pellet			14	INTERNAL CALC, presence at threshold >0.025
Identification type 848_Gradient2_R_S			15	INTERNAL CALC, presence at threshold >0.025
Sequence coverage 848_Gradient1_01 [%]			16	INTERNAL CALC, presence at threshold >0.025
Sequence coverage 848_Gradient1_02 [%]			17	INTERNAL CALC, presence at threshold >0.025
Sequence coverage 848_Gradient1_03 [%]			18	INTERNAL CALC, presence at threshold >0.025
Sequence coverage 848_Gradient1_04 [%]			19	INTERNAL CALC, presence at threshold >0.025
Sequence coverage 848_Gradient1_05 [%]			20	INTERNAL CALC, presence at threshold >0.025
Sequence coverage 848_Gradient1_06 [%]			21	INTERNAL CALC, presence at threshold >0.025
Sequence coverage 848_Gradient1_07 [%]			1	INTERNAL CALC, presence at threshold >0.025
Sequence coverage 848_Gradient1_08 [%]			2	INTERNAL CALC, presence at threshold >0.025
Sequence coverage 848_Gradient1_09 [%]			3	INTERNAL CALC, presence at threshold >0.025
Sequence coverage 848_Gradient1_10 [%]			4	INTERNAL CALC, presence at threshold >0.025
Sequence coverage 848_Gradient1_11 [%]			5	INTERNAL CALC, presence at threshold >0.025
Sequence coverage 848_Gradient1_12 [%]			6	INTERNAL CALC, presence at threshold >0.025
Sequence coverage 848_Gradient1_13 [%]			7	INTERNAL CALC, presence at threshold >0.025
Sequence coverage 848_Gradient1_14 [%]			8	INTERNAL CALC, presence at threshold >0.025
Sequence coverage 848_Gradient1_15 [%]			9	INTERNAL CALC, presence at threshold >0.025
Sequence coverage 848_Gradient1_16 [%]			10	INTERNAL CALC, presence at threshold >0.025
Sequence coverage 848_Gradient1_17 [%]			11	INTERNAL CALC, presence at threshold >0.025
Sequence coverage 848_Gradient1_18 [%]			12	INTERNAL CALC, presence at threshold >0.025
Sequence coverage 848_Gradient1_19 [%]			13	INTERNAL CALC, presence at threshold >0.025
Sequence coverage 848_Gradient1_20 [%]			14	INTERNAL CALC, presence at threshold >0.025
Sequence coverage 848_Gradient1_Pellet [%]			15	INTERNAL CALC, presence at threshold >0.025
Sequence coverage 848_Gradient1_S [%]			16	INTERNAL CALC, presence at threshold >0.025
Sequence coverage 848_Gradient2_R_01 [%]			17	INTERNAL CALC, presence at threshold >0.025
Sequence coverage 848_Gradient2_R_02 [%]			18	INTERNAL CALC, presence at threshold >0.025
Sequence coverage 848_Gradient2_R_03 [%]			19	INTERNAL CALC, presence at threshold >0.025
Sequence coverage 848_Gradient2_R_04 [%]			20	INTERNAL CALC, presence at threshold >0.025
Sequence coverage 848_Gradient2_R_05 [%]			21	INTERNAL CALC, presence at threshold >0.025
Sequence coverage 848_Gradient2_R_06 [%]			1	INTERNAL CALC, presence at threshold >0.005
Sequence coverage 848_Gradient2_R_07 [%]			2	INTERNAL CALC, presence at threshold >0.005
Sequence coverage 848_Gradient2_R_08 [%]			3	INTERNAL CALC, presence at threshold >0.005
Sequence coverage 848_Gradient2_R_09 [%]			4	INTERNAL CALC, presence at threshold >0.005
Sequence coverage 848_Gradient2_R_10 [%]			5	INTERNAL CALC, presence at threshold >0.005
Sequence coverage 848_Gradient2_R_11 [%]			6	INTERNAL CALC, presence at threshold >0.005
Sequence coverage 848_Gradient2_R_12 [%]			7	INTERNAL CALC, presence at threshold >0.005
Sequence coverage 848_Gradient2_R_13 [%]			8	INTERNAL CALC, presence at threshold >0.005
Sequence coverage 848_Gradient2_R_14 [%]			9	INTERNAL CALC, presence at threshold >0.005
Sequence coverage 848_Gradient2_R_15 [%]			10	INTERNAL CALC, presence at threshold >0.005
Sequence coverage 848_Gradient2_R_16 [%]			11	INTERNAL CALC, presence at threshold >0.005
Sequence coverage 848_Gradient2_R_17 [%]			12	INTERNAL CALC, presence at threshold >0.005
Sequence coverage 848_Gradient2_R_18 [%]			13	INTERNAL CALC, presence at threshold >0.005
Sequence coverage 848_Gradient2_R_19 [%]			14	INTERNAL CALC, presence at threshold >0.005
Sequence coverage 848_Gradient2_R_20 [%]			15	INTERNAL CALC, presence at threshold >0.005
Sequence coverage 848_Gradient2_R_Pellet [%]			16	INTERNAL CALC, presence at threshold >0.005
Sequence coverage 848_Gradient2_R_S [%]			17	INTERNAL CALC, presence at threshold >0.005
Intensity			18	INTERNAL CALC, presence at threshold >0.005
Intensity 848_Gradient1_01			19	INTERNAL CALC, presence at threshold >0.005
Intensity 848_Gradient1_02			20	INTERNAL CALC, presence at threshold >0.005
Intensity 848_Gradient1_03			21	INTERNAL CALC, presence at threshold >0.005
Intensity 848_Gradient1_04			1	INTERNAL CALC, presence at threshold >0.005
Intensity 848_Gradient1_05			2	INTERNAL CALC, presence at threshold >0.005
Intensity 848_Gradient1_06			3	INTERNAL CALC, presence at threshold >0.005
Intensity 848_Gradient1_07			4	INTERNAL CALC, presence at threshold >0.005
Intensity 848_Gradient1_08			5	INTERNAL CALC, presence at threshold >0.005
Intensity 848_Gradient1_09			6	INTERNAL CALC, presence at threshold >0.005
Intensity 848_Gradient1_10			7	INTERNAL CALC, presence at threshold >0.005
Intensity 848_Gradient1_11			8	INTERNAL CALC, presence at threshold >0.005
Intensity 848_Gradient1_12			9	INTERNAL CALC, presence at threshold >0.005
Intensity 848_Gradient1_13			10	INTERNAL CALC, presence at threshold >0.005
Intensity 848_Gradient1_14			11	INTERNAL CALC, presence at threshold >0.005
Intensity 848_Gradient1_15			12	INTERNAL CALC, presence at threshold >0.005
Intensity 848_Gradient1_16			13	INTERNAL CALC, presence at threshold >0.005
Intensity 848_Gradient1_17			14	INTERNAL CALC, presence at threshold >0.005
Intensity 848_Gradient1_18			15	INTERNAL CALC, presence at threshold >0.005
Intensity 848_Gradient1_19			16	INTERNAL CALC, presence at threshold >0.005
Intensity 848_Gradient1_20			17	INTERNAL CALC, presence at threshold >0.005
Intensity 848_Gradient1_Pellet			18	INTERNAL CALC, presence at threshold >0.005
Intensity 848_Gradient1_S			19	INTERNAL CALC, presence at threshold >0.005
Intensity 848_Gradient2_R_01			20	INTERNAL CALC, presence at threshold >0.005
Intensity 848_Gradient2_R_02			21	INTERNAL CALC, presence at threshold >0.005
Intensity 848_Gradient2_R_03			distribution ref	distribution calculated by mean of the sums of presence at thresholds for reference gradient
Intensity 848_Gradient2_R_04			distribution +RNase	distribution calculated by mean of the sums of presence at thresholds for +RNase gradient
Intensity 848_Gradient2_R_05			change in distribution	change calculated by distributions of reference and +RNase gradients
Intensity 848_Gradient2_R_06			sum of iBAQ ref gradient	sum of corrected iBAQ values per gradient
Intensity 848_Gradient2_R_07			sum of iBAQ +RNase gradient	sum of corrected iBAQ values per gradient
Intensity 848_Gradient2_R_08			Log total iBAQ ref	Log10 of sum of corrected iBAQ values per gradient
Intensity 848_Gradient2_R_09			Log total iBAQ +RNase	Log10 of sum of corrected iBAQ values per gradient
Intensity 848_Gradient2_R_10			ratio ref2RNase gradient	ratio based on sum of corrected iBAQ values between reference and +RNase gradients
Intensity 848_Gradient2_R_11			present in both gradients	1 if recovered in both gradients
Intensity 848_Gradient2_R_12			ratio <5-fold	1 if the ratio between both gradients was >5 fold
Intensity 848_Gradient2_R_13			shifted protein fraction (%)	sum of positive values of protein change norm2grad
Intensity 848_Gradient2_R_14
Intensity 848_Gradient2_R_15
Intensity 848_Gradient2_R_16
Intensity 848_Gradient2_R_17
Intensity 848_Gradient2_R_18
Intensity 848_Gradient2_R_19
Intensity 848_Gradient2_R_20
Intensity 848_Gradient2_R_Pellet
Intensity 848_Gradient2_R_S
iBAQ
iBAQ 848_Gradient1_01
iBAQ 848_Gradient1_02
iBAQ 848_Gradient1_03
iBAQ 848_Gradient1_04
iBAQ 848_Gradient1_05
iBAQ 848_Gradient1_06
iBAQ 848_Gradient1_07
iBAQ 848_Gradient1_08
iBAQ 848_Gradient1_09
iBAQ 848_Gradient1_10
iBAQ 848_Gradient1_11
iBAQ 848_Gradient1_12
iBAQ 848_Gradient1_13
iBAQ 848_Gradient1_14
iBAQ 848_Gradient1_15
iBAQ 848_Gradient1_16
iBAQ 848_Gradient1_17
iBAQ 848_Gradient1_18
iBAQ 848_Gradient1_19
iBAQ 848_Gradient1_20
iBAQ 848_Gradient1_Pellet
iBAQ 848_Gradient1_S
iBAQ 848_Gradient2_R_01
iBAQ 848_Gradient2_R_02
iBAQ 848_Gradient2_R_03
iBAQ 848_Gradient2_R_04
iBAQ 848_Gradient2_R_05
iBAQ 848_Gradient2_R_06
iBAQ 848_Gradient2_R_07
iBAQ 848_Gradient2_R_08
iBAQ 848_Gradient2_R_09
iBAQ 848_Gradient2_R_10
iBAQ 848_Gradient2_R_11
iBAQ 848_Gradient2_R_12
iBAQ 848_Gradient2_R_13
iBAQ 848_Gradient2_R_14
iBAQ 848_Gradient2_R_15
iBAQ 848_Gradient2_R_16
iBAQ 848_Gradient2_R_17
iBAQ 848_Gradient2_R_18
iBAQ 848_Gradient2_R_19
iBAQ 848_Gradient2_R_20
iBAQ 848_Gradient2_R_Pellet
iBAQ 848_Gradient2_R_S
LFQ intensity 848_Gradient1_01
LFQ intensity 848_Gradient1_02
LFQ intensity 848_Gradient1_03
LFQ intensity 848_Gradient1_04
LFQ intensity 848_Gradient1_05
LFQ intensity 848_Gradient1_06
LFQ intensity 848_Gradient1_07
LFQ intensity 848_Gradient1_08
LFQ intensity 848_Gradient1_09
LFQ intensity 848_Gradient1_10
LFQ intensity 848_Gradient1_11
LFQ intensity 848_Gradient1_12
LFQ intensity 848_Gradient1_13
LFQ intensity 848_Gradient1_14
LFQ intensity 848_Gradient1_15
LFQ intensity 848_Gradient1_16
LFQ intensity 848_Gradient1_17
LFQ intensity 848_Gradient1_18
LFQ intensity 848_Gradient1_19
LFQ intensity 848_Gradient1_20
LFQ intensity 848_Gradient1_Pellet
LFQ intensity 848_Gradient1_S
LFQ intensity 848_Gradient2_R_01
LFQ intensity 848_Gradient2_R_02
LFQ intensity 848_Gradient2_R_03
LFQ intensity 848_Gradient2_R_04
LFQ intensity 848_Gradient2_R_05
LFQ intensity 848_Gradient2_R_06
LFQ intensity 848_Gradient2_R_07
LFQ intensity 848_Gradient2_R_08
LFQ intensity 848_Gradient2_R_09
LFQ intensity 848_Gradient2_R_10
LFQ intensity 848_Gradient2_R_11
LFQ intensity 848_Gradient2_R_12
LFQ intensity 848_Gradient2_R_13
LFQ intensity 848_Gradient2_R_14
LFQ intensity 848_Gradient2_R_15
LFQ intensity 848_Gradient2_R_16
LFQ intensity 848_Gradient2_R_17
LFQ intensity 848_Gradient2_R_18
LFQ intensity 848_Gradient2_R_19
LFQ intensity 848_Gradient2_R_20
LFQ intensity 848_Gradient2_R_Pellet
LFQ intensity 848_Gradient2_R_S
MS/MS count 848_Gradient1_01
MS/MS count 848_Gradient1_02
MS/MS count 848_Gradient1_03
MS/MS count 848_Gradient1_04
MS/MS count 848_Gradient1_05
MS/MS count 848_Gradient1_06
MS/MS count 848_Gradient1_07
MS/MS count 848_Gradient1_08
MS/MS count 848_Gradient1_09
MS/MS count 848_Gradient1_10
MS/MS count 848_Gradient1_11
MS/MS count 848_Gradient1_12
MS/MS count 848_Gradient1_13
MS/MS count 848_Gradient1_14
MS/MS count 848_Gradient1_15
MS/MS count 848_Gradient1_16
MS/MS count 848_Gradient1_17
MS/MS count 848_Gradient1_18
MS/MS count 848_Gradient1_19
MS/MS count 848_Gradient1_20
MS/MS count 848_Gradient1_Pellet
MS/MS count 848_Gradient1_S
MS/MS count 848_Gradient2_R_01
MS/MS count 848_Gradient2_R_02
MS/MS count 848_Gradient2_R_03
MS/MS count 848_Gradient2_R_04
MS/MS count 848_Gradient2_R_05
MS/MS count 848_Gradient2_R_06
MS/MS count 848_Gradient2_R_07
MS/MS count 848_Gradient2_R_08
MS/MS count 848_Gradient2_R_09
MS/MS count 848_Gradient2_R_10
MS/MS count 848_Gradient2_R_11
MS/MS count 848_Gradient2_R_12
MS/MS count 848_Gradient2_R_13
MS/MS count 848_Gradient2_R_14
Protein IDs
Majority protein IDs
Peptide counts (all)
Peptide counts (razor+unique)
Peptide counts (unique)
Fasta headers
Number of proteins
Peptides
Razor + unique peptides
Unique peptides
Peptides 848_Gradient1_01
Peptides 848_Gradient1_02
Peptides 848_Gradient1_03
Peptides 848_Gradient1_04
Peptides 848_Gradient1_05
Peptides 848_Gradient1_06
Peptides 848_Gradient1_07
Peptides 848_Gradient1_08
Peptides 848_Gradient1_09
Peptides 848_Gradient1_10
Peptides 848_Gradient1_11
Peptides 848_Gradient1_12
Peptides 848_Gradient1_13
Peptides 848_Gradient1_14
Peptides 848_Gradient1_15
Peptides 848_Gradient1_16
Peptides 848_Gradient1_17
Peptides 848_Gradient1_18
Peptides 848_Gradient1_19
Peptides 848_Gradient1_20
Peptides 848_Gradient1_Pellet
Peptides 848_Gradient1_S
Peptides 848_Gradient2_R_01
Peptides 848_Gradient2_R_02
Peptides 848_Gradient2_R_03
Peptides 848_Gradient2_R_04
Peptides 848_Gradient2_R_05
Peptides 848_Gradient2_R_06
Peptides 848_Gradient2_R_07
Peptides 848_Gradient2_R_08
Peptides 848_Gradient2_R_09
Peptides 848_Gradient2_R_10
Peptides 848_Gradient2_R_11
Peptides 848_Gradient2_R_12
Peptides 848_Gradient2_R_13
Peptides 848_Gradient2_R_14
Peptides 848_Gradient2_R_15
Peptides 848_Gradient2_R_16
Peptides 848_Gradient2_R_17
Peptides 848_Gradient2_R_18
Peptides 848_Gradient2_R_19
Peptides 848_Gradient2_R_20
Peptides 848_Gradient2_R_Pellet
Peptides 848_Gradient2_R_S
Razor + unique peptides 848_Gradient1_01
Razor + unique peptides 848_Gradient1_02
Razor + unique peptides 848_Gradient1_03
Razor + unique peptides 848_Gradient1_04
Razor + unique peptides 848_Gradient1_05
Razor + unique peptides 848_Gradient1_06
Razor + unique peptides 848_Gradient1_07
Razor + unique peptides 848_Gradient1_08
Razor + unique peptides 848_Gradient1_09
Razor + unique peptides 848_Gradient1_10
Razor + unique peptides 848_Gradient1_11
Razor + unique peptides 848_Gradient1_12
Razor + unique peptides 848_Gradient1_13
Razor + unique peptides 848_Gradient1_14
Razor + unique peptides 848_Gradient1_15
Razor + unique peptides 848_Gradient1_16
Razor + unique peptides 848_Gradient1_17
Razor + unique peptides 848_Gradient1_18
Razor + unique peptides 848_Gradient1_19
Razor + unique peptides 848_Gradient1_20
Razor + unique peptides 848_Gradient1_Pellet
Razor + unique peptides 848_Gradient1_S
Razor + unique peptides 848_Gradient2_R_01
Razor + unique peptides 848_Gradient2_R_02
Razor + unique peptides 848_Gradient2_R_03
Razor + unique peptides 848_Gradient2_R_04
Razor + unique peptides 848_Gradient2_R_05
Razor + unique peptides 848_Gradient2_R_06
Razor + unique peptides 848_Gradient2_R_07
Razor + unique peptides 848_Gradient2_R_08
Razor + unique peptides 848_Gradient2_R_09
Razor + unique peptides 848_Gradient2_R_10
Razor + unique peptides 848_Gradient2_R_11
Razor + unique peptides 848_Gradient2_R_12
Razor + unique peptides 848_Gradient2_R_13
Razor + unique peptides 848_Gradient2_R_14
Razor + unique peptides 848_Gradient2_R_15
Razor + unique peptides 848_Gradient2_R_16
Razor + unique peptides 848_Gradient2_R_17
Razor + unique peptides 848_Gradient2_R_18
Razor + unique peptides 848_Gradient2_R_19
Razor + unique peptides 848_Gradient2_R_20
Razor + unique peptides 848_Gradient2_R_Pellet
Razor + unique peptides 848_Gradient2_R_S
Unique peptides 848_Gradient1_01
Unique peptides 848_Gradient1_02
Unique peptides 848_Gradient1_03
Unique peptides 848_Gradient1_04
Unique peptides 848_Gradient1_05
Unique peptides 848_Gradient1_06
Unique peptides 848_Gradient1_07
Unique peptides 848_Gradient1_08
Unique peptides 848_Gradient1_09
Unique peptides 848_Gradient1_10
Unique peptides 848_Gradient1_11
Unique peptides 848_Gradient1_12
Unique peptides 848_Gradient1_13
Unique peptides 848_Gradient1_14
Unique peptides 848_Gradient1_15
Unique peptides 848_Gradient1_16
Unique peptides 848_Gradient1_17
Unique peptides 848_Gradient1_18
Unique peptides 848_Gradient1_19
Unique peptides 848_Gradient1_20
Unique peptides 848_Gradient1_Pellet
Unique peptides 848_Gradient1_S
Unique peptides 848_Gradient2_R_01
Unique peptides 848_Gradient2_R_02
Unique peptides 848_Gradient2_R_03
Unique peptides 848_Gradient2_R_04
Unique peptides 848_Gradient2_R_05
Unique peptides 848_Gradient2_R_06
Unique peptides 848_Gradient2_R_07
Unique peptides 848_Gradient2_R_08
Unique peptides 848_Gradient2_R_09
Unique peptides 848_Gradient2_R_10
Unique peptides 848_Gradient2_R_11
Unique peptides 848_Gradient2_R_12
Unique peptides 848_Gradient2_R_13
Unique peptides 848_Gradient2_R_14
Unique peptides 848_Gradient2_R_15
Unique peptides 848_Gradient2_R_16
Unique peptides 848_Gradient2_R_17
Unique peptides 848_Gradient2_R_18
Unique peptides 848_Gradient2_R_19
Unique peptides 848_Gradient2_R_20
Unique peptides 848_Gradient2_R_Pellet
Unique peptides 848_Gradient2_R_S
Sequence coverage [%]
Unique + razor sequence coverage [%]
Unique sequence coverage [%]
Mol. weight [kDa]
Sequence length
Sequence lengths
Fraction average
Fraction 101
Fraction 102
Fraction 103
Fraction 104
Fraction 105
Fraction 106
Fraction 107
Fraction 108
Fraction 109
Fraction 110
Fraction 111
Fraction 112
Fraction 113
Fraction 114
Fraction 115
Fraction 116
Fraction 117
Fraction 118
Fraction 119
Fraction 120
Fraction 121
Fraction 150
Fraction 201
Fraction 202
Fraction 203
Fraction 204
Fraction 205
Fraction 206
Fraction 207
Fraction 208
Fraction 209
Fraction 210
Fraction 211
Fraction 212
Fraction 213
Fraction 214
Fraction 215
Fraction 216
Fraction 217
Fraction 218
Fraction 219
Fraction 220
Fraction 221
Fraction 250
Q-value
Score
Identification type 848_Gradient1_01
Identification type 848_Gradient1_02
Identification type 848_Gradient1_03
Identification type 848_Gradient1_04
Identification type 848_Gradient1_05
Identification type 848_Gradient1_06
Identification type 848_Gradient1_07
Identification type 848_Gradient1_08
Identification type 848_Gradient1_09
Identification type 848_Gradient1_10
Identification type 848_Gradient1_11
Identification type 848_Gradient1_12
Identification type 848_Gradient1_13
Identification type 848_Gradient1_14
Identification type 848_Gradient1_15
Identification type 848_Gradient1_16
Identification type 848_Gradient1_17
Identification type 848_Gradient1_18
Identification type 848_Gradient1_19
Identification type 848_Gradient1_20
Identification type 848_Gradient1_Pellet
Identification type 848_Gradient1_S
Identification type 848_Gradient2_R_01
Identification type 848_Gradient2_R_02
Identification type 848_Gradient2_R_03
Identification type 848_Gradient2_R_04
Identification type 848_Gradient2_R_05
Identification type 848_Gradient2_R_06
Identification type 848_Gradient2_R_07
Identification type 848_Gradient2_R_08
Identification type 848_Gradient2_R_09
Identification type 848_Gradient2_R_10
Identification type 848_Gradient2_R_11
Identification type 848_Gradient2_R_12
Identification type 848_Gradient2_R_13
Identification type 848_Gradient2_R_14
Identification type 848_Gradient2_R_15
Identification type 848_Gradient2_R_16
Identification type 848_Gradient2_R_17
Identification type 848_Gradient2_R_18
Identification type 848_Gradient2_R_19
Identification type 848_Gradient2_R_20
Identification type 848_Gradient2_R_Pellet
Identification type 848_Gradient2_R_S
Sequence coverage 848_Gradient1_01 [%]
Sequence coverage 848_Gradient1_02 [%]
Sequence coverage 848_Gradient1_03 [%]
Sequence coverage 848_Gradient1_04 [%]
Sequence coverage 848_Gradient1_05 [%]
Sequence coverage 848_Gradient1_06 [%]
Sequence coverage 848_Gradient1_07 [%]
Sequence coverage 848_Gradient1_08 [%]
Sequence coverage 848_Gradient1_09 [%]
Sequence coverage 848_Gradient1_10 [%]
Sequence coverage 848_Gradient1_11 [%]
Sequence coverage 848_Gradient1_12 [%]
Sequence coverage 848_Gradient1_13 [%]
Sequence coverage 848_Gradient1_14 [%]
Sequence coverage 848_Gradient1_15 [%]
Sequence coverage 848_Gradient1_16 [%]
Sequence coverage 848_Gradient1_17 [%]
Sequence coverage 848_Gradient1_18 [%]
Sequence coverage 848_Gradient1_19 [%]
Sequence coverage 848_Gradient1_20 [%]
Sequence coverage 848_Gradient1_Pellet [%]
Sequence coverage 848_Gradient1_S [%]
Sequence coverage 848_Gradient2_R_01 [%]
Sequence coverage 848_Gradient2_R_02 [%]
Sequence coverage 848_Gradient2_R_03 [%]
Sequence coverage 848_Gradient2_R_04 [%]
Sequence coverage 848_Gradient2_R_05 [%]
Sequence coverage 848_Gradient2_R_06 [%]
Sequence coverage 848_Gradient2_R_07 [%]
Sequence coverage 848_Gradient2_R_08 [%]
Sequence coverage 848_Gradient2_R_09 [%]
Sequence coverage 848_Gradient2_R_10 [%]
Sequence coverage 848_Gradient2_R_11 [%]
Sequence coverage 848_Gradient2_R_12 [%]
Sequence coverage 848_Gradient2_R_13 [%]
Sequence coverage 848_Gradient2_R_14 [%]
Sequence coverage 848_Gradient2_R_15 [%]
Sequence coverage 848_Gradient2_R_16 [%]
Sequence coverage 848_Gradient2_R_17 [%]
Sequence coverage 848_Gradient2_R_18 [%]
Sequence coverage 848_Gradient2_R_19 [%]
Sequence coverage 848_Gradient2_R_20 [%]
Sequence coverage 848_Gradient2_R_Pellet [%]
Sequence coverage 848_Gradient2_R_S [%]
Intensity
Intensity 848_Gradient1_01
Intensity 848_Gradient1_02
Intensity 848_Gradient1_03
Intensity 848_Gradient1_04
Intensity 848_Gradient1_05
Intensity 848_Gradient1_06
Intensity 848_Gradient1_07
Intensity 848_Gradient1_08
Intensity 848_Gradient1_09
Intensity 848_Gradient1_10
Intensity 848_Gradient1_11
Intensity 848_Gradient1_12
Intensity 848_Gradient1_13
Intensity 848_Gradient1_14
Intensity 848_Gradient1_15
Intensity 848_Gradient1_16
Intensity 848_Gradient1_17
Intensity 848_Gradient1_18
Intensity 848_Gradient1_19
Intensity 848_Gradient1_20
Intensity 848_Gradient1_Pellet
Intensity 848_Gradient1_S
Intensity 848_Gradient2_R_01
Intensity 848_Gradient2_R_02
Intensity 848_Gradient2_R_03
Intensity 848_Gradient2_R_04
Intensity 848_Gradient2_R_05
Intensity 848_Gradient2_R_06
Intensity 848_Gradient2_R_07
Intensity 848_Gradient2_R_08
Intensity 848_Gradient2_R_09
Intensity 848_Gradient2_R_10
Intensity 848_Gradient2_R_11
Intensity 848_Gradient2_R_12
Intensity 848_Gradient2_R_13
Intensity 848_Gradient2_R_14
Intensity 848_Gradient2_R_15
Intensity 848_Gradient2_R_16
Intensity 848_Gradient2_R_17
Intensity 848_Gradient2_R_18
Intensity 848_Gradient2_R_19
Intensity 848_Gradient2_R_20
Intensity 848_Gradient2_R_Pellet
Intensity 848_Gradient2_R_S
iBAQ
iBAQ 848_Gradient1_01
iBAQ 848_Gradient1_02
iBAQ 848_Gradient1_03
iBAQ 848_Gradient1_04
iBAQ 848_Gradient1_05
iBAQ 848_Gradient1_06
iBAQ 848_Gradient1_07
iBAQ 848_Gradient1_08
iBAQ 848_Gradient1_09
iBAQ 848_Gradient1_10
iBAQ 848_Gradient1_11
iBAQ 848_Gradient1_12
iBAQ 848_Gradient1_13
iBAQ 848_Gradient1_14
iBAQ 848_Gradient1_15
iBAQ 848_Gradient1_16
iBAQ 848_Gradient1_17
iBAQ 848_Gradient1_18
iBAQ 848_Gradient1_19
iBAQ 848_Gradient1_20
iBAQ 848_Gradient1_Pellet
iBAQ 848_Gradient1_S
iBAQ 848_Gradient2_R_01
iBAQ 848_Gradient2_R_02
iBAQ 848_Gradient2_R_03
iBAQ 848_Gradient2_R_04
iBAQ 848_Gradient2_R_05
iBAQ 848_Gradient2_R_06
iBAQ 848_Gradient2_R_07
iBAQ 848_Gradient2_R_08
iBAQ 848_Gradient2_R_09
iBAQ 848_Gradient2_R_10
iBAQ 848_Gradient2_R_11
iBAQ 848_Gradient2_R_12
iBAQ 848_Gradient2_R_13
iBAQ 848_Gradient2_R_14
iBAQ 848_Gradient2_R_15
iBAQ 848_Gradient2_R_16
iBAQ 848_Gradient2_R_17
iBAQ 848_Gradient2_R_18
iBAQ 848_Gradient2_R_19
iBAQ 848_Gradient2_R_20
iBAQ 848_Gradient2_R_Pellet
iBAQ 848_Gradient2_R_S
LFQ intensity 848_Gradient1_01
LFQ intensity 848_Gradient1_02
LFQ intensity 848_Gradient1_03
LFQ intensity 848_Gradient1_04
LFQ intensity 848_Gradient1_05
LFQ intensity 848_Gradient1_06
LFQ intensity 848_Gradient1_07
LFQ intensity 848_Gradient1_08
LFQ intensity 848_Gradient1_09
LFQ intensity 848_Gradient1_10
LFQ intensity 848_Gradient1_11
LFQ intensity 848_Gradient1_12
LFQ intensity 848_Gradient1_13
LFQ intensity 848_Gradient1_14
LFQ intensity 848_Gradient1_15
LFQ intensity 848_Gradient1_16
LFQ intensity 848_Gradient1_17
LFQ intensity 848_Gradient1_18
LFQ intensity 848_Gradient1_19
LFQ intensity 848_Gradient1_20
LFQ intensity 848_Gradient1_Pellet
LFQ intensity 848_Gradient1_S
LFQ intensity 848_Gradient2_R_01
LFQ intensity 848_Gradient2_R_02
LFQ intensity 848_Gradient2_R_03
LFQ intensity 848_Gradient2_R_04
LFQ intensity 848_Gradient2_R_05
LFQ intensity 848_Gradient2_R_06
LFQ intensity 848_Gradient2_R_07
LFQ intensity 848_Gradient2_R_08
LFQ intensity 848_Gradient2_R_09
LFQ intensity 848_Gradient2_R_10
LFQ intensity 848_Gradient2_R_11
LFQ intensity 848_Gradient2_R_12
LFQ intensity 848_Gradient2_R_13
LFQ intensity 848_Gradient2_R_14
LFQ intensity 848_Gradient2_R_15
LFQ intensity 848_Gradient2_R_16
LFQ intensity 848_Gradient2_R_17
LFQ intensity 848_Gradient2_R_18
LFQ intensity 848_Gradient2_R_19
LFQ intensity 848_Gradient2_R_20
LFQ intensity 848_Gradient2_R_Pellet
LFQ intensity 848_Gradient2_R_S
MS/MS count 848_Gradient1_01
MS/MS count 848_Gradient1_02
MS/MS count 848_Gradient1_03
MS/MS count 848_Gradient1_04
MS/MS count 848_Gradient1_05
MS/MS count 848_Gradient1_06
MS/MS count 848_Gradient1_07
MS/MS count 848_Gradient1_08
MS/MS count 848_Gradient1_09
MS/MS count 848_Gradient1_10
MS/MS count 848_Gradient1_11
MS/MS count 848_Gradient1_12
MS/MS count 848_Gradient1_13
MS/MS count 848_Gradient1_14
MS/MS count 848_Gradient1_15
MS/MS count 848_Gradient1_16
MS/MS count 848_Gradient1_17
MS/MS count 848_Gradient1_18
MS/MS count 848_Gradient1_19
MS/MS count 848_Gradient1_20
MS/MS count 848_Gradient1_Pellet
MS/MS count 848_Gradient1_S
MS/MS count 848_Gradient2_R_01
MS/MS count 848_Gradient2_R_02
MS/MS count 848_Gradient2_R_03
MS/MS count 848_Gradient2_R_04
MS/MS count 848_Gradient2_R_05
MS/MS count 848_Gradient2_R_06
MS/MS count 848_Gradient2_R_07
MS/MS count 848_Gradient2_R_08
MS/MS count 848_Gradient2_R_09
MS/MS count 848_Gradient2_R_10
MS/MS count 848_Gradient2_R_11
MS/MS count 848_Gradient2_R_12
MS/MS count 848_Gradient2_R_13
MS/MS count 848_Gradient2_R_14
MS/MS count 848_Gradient2_R_15
MS/MS count 848_Gradient2_R_16
MS/MS count 848_Gradient2_R_17
MS/MS count 848_Gradient2_R_18
MS/MS count 848_Gradient2_R_19
MS/MS count 848_Gradient2_R_20
MS/MS count 848_Gradient2_R_Pellet
MS/MS count 848_Gradient2_R_S
MS/MS count
Only identified by site
Reverse
Potential contaminant
id
Peptide IDs
Peptide is razor
Mod. peptide IDs
Evidence IDs
MS/MS IDs
Best MS/MS
Oxidation (M) site IDs
Oxidation (M) site positions

## Sheet: RAW_MS_DATA_No848
Protein IDs	Majority protein IDs	Peptide counts (all)	Peptide counts (razor+unique)	Peptide counts (unique)	Fasta headers	Number of proteins	Peptides	Razor + unique peptides	Unique peptides	Peptides 848_Gradient1_01	Peptides 848_Gradient1_02	Peptides 848_Gradient1_03	Peptides 848_Gradient1_04	Peptides 848_Gradient1_05	Peptides 848_Gradient1_06	Peptides 848_Gradient1_07	Peptides 848_Gradient1_08	Peptides 848_Gradient1_09	Peptides 848_Gradient1_10	Peptides 848_Gradient1_11	Peptides 848_Gradient1_12	Peptides 848_Gradient1_13	Peptides 848_Gradient1_14	Peptides 848_Gradient1_15	Peptides 848_Gradient1_16	Peptides 848_Gradient1_17	Peptides 848_Gradient1_18	Peptides 848_Gradient1_19	Peptides 848_Gradient1_20	Peptides 848_Gradient1_Pellet	Peptides 848_Gradient1_S	Peptides 848_Gradient2_R_01	Peptides 848_Gradient2_R_02	Peptides 848_Gradient2_R_03	Peptides 848_Gradient2_R_04	Peptides 848_Gradient2_R_05	Peptides 848_Gradient2_R_06	Peptides 848_Gradient2_R_07	Peptides 848_Gradient2_R_08	Peptides 848_Gradient2_R_09	Peptides 848_Gradient2_R_10	Peptides 848_Gradient2_R_11	Peptides 848_Gradient2_R_12	Peptides 848_Gradient2_R_13	Peptides 848_Gradient2_R_14	Peptides 848_Gradient2_R_15	Peptides 848_Gradient2_R_16	Peptides 848_Gradient2_R_17	Peptides 848_Gradient2_R_18
A0A0G2PMS1	A0A0G2PMS1	48	48	48	tr|A0A0G2PMS1|A0A0G2PMS1_SALTS Elongation factor Tu OS=Salmonella typhimurium (strain SL1344) OX=216597 GN=tufB PE=3 SV=1	1	48	48	48	39	39	37	36	34	37	36	34	31	29	32	21	30	15	15	11	13	16	13	10	20	27	37	38	41	35	34	32	31	27	30	24	21	22	18	17	16	12	11	18
A0A0G2PMS3	A0A0G2PMS3	3	3	3	tr|A0A0G2PMS3|A0A0G2PMS3_SALTS Cytochrome C-type biogenesis protein OS=Salmonella typhimurium (strain SL1344) OX=216597 GN=ccmG2 PE=4 SV=1	1	3	3	3	0	0	0	0	0	0	0	0	0	0	0	0	0	0	0	0	0	0	0	0	3	0	0	0	0	0	0	0	0	0	0	0	0	0	0	0	0	0	0	0
A0A0H3N7C5	A0A0H3N7C5	10	10	10	tr|A0A0H3N7C5|A0A0H3N7C5_SALTS Hypothetical secreted sulfatase OS=Salmonella typhimurium (strain SL1344) OX=216597 GN=SL1344_0036 PE=4 SV=1	1	10	10	10	0	2	7	5	5	4	2	1	0	0	0	0	0	0	0	0	0	0	0	0	0	1	0	0	4	0	1	0	0	0	0	1	0	0	0	0	0	0	0	0
A0A0H3N7D0	A0A0H3N7D0	8	8	8	tr|A0A0H3N7D0|A0A0H3N7D0_SALTS Transcriptional activator protein NhaR OS=Salmonella typhimurium (strain SL1344) OX=216597 GN=nhaR PE=4 SV=1	1	8	8	8	0	5	6	6	6	5	5	4	2	0	0	0	0	0	0	0	0	0	0	0	0	0	0	2	4	2	3	2	2	1	1	0	0	0	0	0	0	0	0	0
A0A0H3N7D5	A0A0H3N7D5	11	11	11	tr|A0A0H3N7D5|A0A0H3N7D5_SALTS Riboflavin biosynthesis protein OS=Salmonella typhimurium (strain SL1344) OX=216597 GN=ribF PE=3 SV=1	1	11	11	11	9	9	8	5	3	3	1	0	0	0	0	0	0	0	0	0	0	0	0	0	0	3	4	4	5	3	1	0	1	1	1	1	1	0	0	0	0	0	0	0
A0A0H3N7E1	A0A0H3N7E1	4	4	4	tr|A0A0H3N7E1|A0A0H3N7E1_SALTS Uncharacterized protein OS=Salmonella typhimurium (strain SL1344) OX=216597 GN=SL1344_0051 PE=4 SV=1	1	4	4	4	1	2	2	2	2	2	0	0	1	1	1	1	1	1	1	0	0	0	0	0	0	0	0	0	1	1	1	1	0	0	0	0	0	0	0	0	0	0	0	0
A0A0H3N7F3	A0A0H3N7F3	34	34	34	tr|A0A0H3N7F3|A0A0H3N7F3_SALTS Carbamoyl-phosphate synthase large chain OS=Salmonella typhimurium (strain SL1344) OX=216597 GN=carB PE=3 SV=1	1	34	34	34	0	2	25	25	23	15	11	5	4	0	0	0	0	0	0	0	0	0	0	0	0	3	0	2	19	9	9	6	3	1	1	1	0	0	0	0	0	0	0	0
A0A0H3N7F7	A0A0H3N7F7	1	1	1	tr|A0A0H3N7F7|A0A0H3N7F7_SALTS Crotonobetainyl-CoA reductase OS=Salmonella typhimurium (strain SL1344) OX=216597 GN=caiA PE=3 SV=1	1	1	1	1	0	1	1	0	0	0	0	0	0	0	0	0	0	0	0	0	0	0	0	0	0	0	0	0	0	0	0	0	0	0	0	0	0	0	0	0	0	0	0	0
A0A0H3N7G5	A0A0H3N7G5	3	3	3	tr|A0A0H3N7G5|A0A0H3N7G5_SALTS Hypothetical sulfatase OS=Salmonella typhimurium (strain SL1344) OX=216597 GN=SL1344_0084 PE=4 SV=1	1	3	3	3	0	0	0	1	2	1	1	1	1	1	1	0	1	0	0	0	0	0	0	0	0	0	0	0	1	0	0	0	0	0	0	0	0	0	0	0	0	0	0	0
A0A0H3N7G7	A0A0H3N7G7	5	5	5	tr|A0A0H3N7G7|A0A0H3N7G7_SALTS Homoserine kinase OS=Salmonella typhimurium (strain SL1344) OX=216597 GN=thrB PE=3 SV=1	1	5	5	5	1	3	2	1	0	0	0	1	0	0	0	1	0	0	0	0	0	0	0	0	0	0	1	1	3	1	1	1	0	0	0	0	0	0	0	0	0	0	0	0
A0A0H3N7H1	A0A0H3N7H1	4	4	4	tr|A0A0H3N7H1|A0A0H3N7H1_SALTS Protein ApaG OS=Salmonella typhimurium (strain SL1344) OX=216597 GN=apaG PE=3 SV=1	1	4	4	4	4	4	3	3	0	1	0	0	0	0	0	0	0	0	0	0	0	0	0	0	0	1	1	1	3	0	0	0	0	0	0	0	0	0	0	0	0	0	0	0
A0A0H3N7H3	A0A0H3N7H3	8	8	8	tr|A0A0H3N7H3|A0A0H3N7H3_SALTS Molybdopterin biosynthesis Mog protein OS=Salmonella typhimurium (strain SL1344) OX=216597 GN=mog PE=4 SV=1	1	8	8	8	6	7	6	6	6	4	4	2	2	3	3	0	0	0	0	0	0	1	1	1	1	3	3	3	7	2	1	0	0	0	1	1	1	1	1	1	1	1	1	1
A0A0H3N7H5	A0A0H3N7H5	3	3	3	tr|A0A0H3N7H5|A0A0H3N7H5_SALTS Co-chaperone protein DjlA OS=Salmonella typhimurium (strain SL1344) OX=216597 GN=djlA PE=3 SV=1	1	3	3	3	0	0	1	1	1	1	1	1	1	0	0	0	0	0	0	0	0	0	0	0	2	0	0	0	0	0	0	0	0	0	0	0	0	0	0	0	0	0	0	0
A0A0H3N7I0	A0A0H3N7I0	25	25	25	tr|A0A0H3N7I0|A0A0H3N7I0_SALTS Chaperone protein DnaJ OS=Salmonella typhimurium (strain SL1344) OX=216597 GN=dnaJ PE=3 SV=1	1	25	25	25	2	2	8	13	16	20	18	18	19	15	16	6	17	6	14	9	11	13	8	1	11	2	0	0	2	2	2	2	2	2	2	2	2	2	2	2	2	1	1	6
A0A0H3N7I8	A0A0H3N7I8	3	3	3	tr|A0A0H3N7I8|A0A0H3N7I8_SALTS 3-isopropylmalate dehydratase small subunit OS=Salmonella typhimurium (strain SL1344) OX=216597 GN=leuD PE=3 SV=1	1	3	3	3	2	3	1	0	0	0	0	0	0	0	0	0	0	0	0	0	0	0	0	0	0	0	0	0	2	1	1	0	0	0	0	0	0	0	0	0	0	0	0	0
A0A0H3N7J7	A0A0H3N7J7	11	11	11	tr|A0A0H3N7J7|A0A0H3N7J7_SALTS Ribosomal RNA small subunit methyltransferase H OS=Salmonella typhimurium (strain SL1344) OX=216597 GN=mraW PE=3 SV=1	1	11	11	11	11	10	9	6	6	4	3	1	0	0	0	0	0	0	0	0	0	0	0	0	2	4	5	6	6	5	3	2	0	0	0	0	0	0	0	0	0	0	0	0
A0A0H3N7J9	A0A0H3N7J9	5	5	5	tr|A0A0H3N7J9|A0A0H3N7J9_SALTS Hypothetical exported protein OS=Salmonella typhimurium (strain SL1344) OX=216597 GN=bcfH PE=4 SV=1	1	5	5	5	4	2	0	0	0	0	0	0	0	0	0	0	0	0	0	0	0	0	0	0	0	0	0	1	0	0	0	0	0	0	0	0	0	0	0	0	0	0	0	0
A0A0H3N7K6	A0A0H3N7K6	12	12	12	tr|A0A0H3N7K6|A0A0H3N7K6_SALTS D-alanine--D-alanine ligase OS=Salmonella typhimurium (strain SL1344) OX=216597 GN=ddlB PE=3 SV=1	1	12	12	12	11	12	11	11	9	5	4	3	3	2	0	0	0	0	0	0	0	0	0	0	0	4	4	5	9	5	2	2	1	0	1	0	0	0	1	0	0	0	0	0
A0A0H3N7L4	A0A0H3N7L4	12	12	12	tr|A0A0H3N7L4|A0A0H3N7L4_SALTS Dephospho-CoA kinase OS=Salmonella typhimurium (strain SL1344) OX=216597 GN=coaE PE=3 SV=1	1	12	12	12	12	10	8	5	4	3	2	1	0	0	0	0	0	0	0	0	0	0	0	0	0	2	4	4	6	1	2	2	0	0	0	0	1	0	0	0	0	0	0	0
A0A0H3N7L9	A0A0H3N7L9	14	14	14	tr|A0A0H3N7L9|A0A0H3N7L9_SALTS Nicotinate-nucleotide pyrophosphorylase OS=Salmonella typhimurium (strain SL1344) OX=216597 GN=nadC PE=4 SV=1	1	14	14	14	8	10	7	4	2	2	1	0	0	0	0	0	0	0	0	0	0	0	0	0	1	3	3	4	9	5	5	2	2	0	0	0	0	0	0	0	0	0	0	0
A0A0H3N7M4	A0A0H3N7M4	90	90	90	tr|A0A0H3N7M4|A0A0H3N7M4_SALTS Acetyltransferase component of pyruvate dehydrogenase complex OS=Salmonella typhimurium (strain SL1344) OX=216597 GN=aceF PE=3 SV=1	1	90	90	90	4	4	4	8	31	37	35	31	32	34	35	48	77	73	66	48	44	36	23	9	14	19	0	0	3	2	17	19	25	21	21	20	25	32	53	51	43	33	29	30
A0A0H3N7M9	A0A0H3N7M9	14	14	14	tr|A0A0H3N7M9|A0A0H3N7M9_SALTS HNH endonuclease OS=Salmonella typhimurium (strain SL1344) OX=216597 GN=SL1344_0160 PE=4 SV=1	1	14	14	14	8	12	9	7	3	2	1	0	0	0	0	0	0	0	0	0	0	0	0	0	0	0	1	1	5	1	1	0	0	0	0	0	0	0	0	0	0	0	0	0
A0A0H3N7N0	A0A0H3N7N0	3	3	3	tr|A0A0H3N7N0|A0A0H3N7N0_SALTS Transcriptional regulatory protein OS=Salmonella typhimurium (strain SL1344) OX=216597 GN=citB2 PE=4 SV=1	1	3	3	3	0	0	0	0	0	0	1	1	1	1	2	2	0	0	0	0	0	0	0	0	0	0	0	0	0	0	0	0	1	2	1	1	1	1	0	0	0	0	0	0
A0A0H3N7N4	A0A0H3N7N4	11	11	11	tr|A0A0H3N7N4|A0A0H3N7N4_SALTS Hypothetical transcriptional regulator OS=Salmonella typhimurium (strain SL1344) OX=216597 GN=SL1344_0165 PE=4 SV=1	1	11	11	11	4	4	5	5	5	4	4	5	6	5	5	3	4	1	0	0	0	0	0	0	2	1	0	0	1	2	2	2	1	0	1	0	1	1	1	0	0	0	0	0
A0A0H3N7N9	A0A0H3N7N9	11	11	11	tr|A0A0H3N7N9|A0A0H3N7N9_SALTS Glucose dehydrogenase OS=Salmonella typhimurium (strain SL1344) OX=216597 GN=gcd PE=4 SV=1	1	11	11	11	1	1	1	1	1	1	1	1	1	1	1	0	0	0	0	0	0	0	0	0	7	0	0	0	0	0	0	0	0	0	0	0	0	0	0	0	0	0	0	0
A0A0H3N7P7	A0A0H3N7P7	9	9	9	tr|A0A0H3N7P7|A0A0H3N7P7_SALTS Uncharacterized protein OS=Salmonella typhimurium (strain SL1344) OX=216597 GN=yadE PE=4 SV=1	1	9	9	9	0	0	0	0	0	0	0	0	0	0	0	0	0	0	0	0	0	4	7	5	3	0	0	0	0	0	0	0	0	0	0	0	0	0	0	1	5	3	3	3
A0A0H3N7Q0	A0A0H3N7Q0	19	19	19	tr|A0A0H3N7Q0|A0A0H3N7Q0_SALTS Poly(A) polymerase I OS=Salmonella typhimurium (strain SL1344) OX=216597 GN=pcnB PE=3 SV=1	1	19	19	19	0	0	0	1	3	3	3	4	4	4	3	1	4	2	0	2	1	1	1	0	12	0	0	0	0	0	0	0	0	0	0	0	0	1	1	3	3	4	4	9
A0A0H3N7Q4	A0A0H3N7Q4	20	20	20	tr|A0A0H3N7Q4|A0A0H3N7Q4_SALTS ATP-dependent helicase HrpB OS=Salmonella typhimurium (strain SL1344) OX=216597 GN=hrpB PE=4 SV=1	1	20	20	20	7	13	11	8	8	4	4	1	1	2	2	0	1	0	0	0	0	0	0	0	0	1	1	2	11	3	2	2	1	0	0	0	0	0	0	0	0	0	0	0
A0A0H3N7S1	A0A0H3N7S1	2	2	2	tr|A0A0H3N7S1|A0A0H3N7S1_SALTS Uncharacterized protein OS=Salmonella typhimurium (strain SL1344) OX=216597 GN=cdaR PE=4 SV=1	1	2	2	2	0	1	1	1	1	0	0	0	0	0	0	0	0	0	0	0	0	0	0	0	0	0	0	0	0	0	0	0	0	0	0	0	0	0	0	0	0	0	0	0
A0A0H3N7S5	A0A0H3N7S5	15	15	15	tr|A0A0H3N7S5|A0A0H3N7S5_SALTS Methionine aminopeptidase OS=Salmonella typhimurium (strain SL1344) OX=216597 GN=map PE=3 SV=1	1	15	15	15	12	14	11	10	8	7	6	4	3	3	1	1	1	0	0	0	0	0	0	0	0	5	7	7	10	5	5	5	4	3	3	3	1	0	0	0	0	0	0	0
A0A0H3N7T0	A0A0H3N7T0	16	16	16	tr|A0A0H3N7T0|A0A0H3N7T0_SALTS 1-deoxy-D-xylulose 5-phosphate reductoisomerase OS=Salmonella typhimurium (strain SL1344) OX=216597 GN=dxr PE=3 SV=1	1	16	16	16	4	14	13	6	4	1	2	1	0	0	0	0	0	0	0	0	0	0	0	0	0	1	1	1	8	3	1	1	1	1	0	0	0	0	0	0	0	0	0	0
A0A0H3N7T4	A0A0H3N7T4	6	6	6	tr|A0A0H3N7T4|A0A0H3N7T4_SALTS Outer membrane protein OmpH OS=Salmonella typhimurium (strain SL1344) OX=216597 GN=hlpA PE=3 SV=1	1	6	6	6	4	5	5	5	4	5	4	4	4	4	5	2	4	1	2	2	1	1	0	0	1	5	4	4	6	5	4	4	4	4	4	4	4	3	3	1	1	0	1	0
A0A0H3N7T6	A0A0H3N7T6	5	5	5	tr|A0A0H3N7T6|A0A0H3N7T6_SALTS Ribonuclease HII OS=Salmonella typhimurium (strain SL1344) OX=216597 GN=rnhB PE=3 SV=1	1	5	5	5	4	4	3	1	0	0	1	1	1	1	1	0	0	0	0	0	0	0	0	0	0	0	2	0	1	0	0	0	0	0	0	0	0	0	0	0	0	0	0	0
A0A0H3N7U0	A0A0H3N7U0	4	4	4	tr|A0A0H3N7U0|A0A0H3N7U0_SALTS Uncharacterized protein OS=Salmonella typhimurium (strain SL1344) OX=216597 GN=yaeR PE=4 SV=1	1	4	4	4	4	4	2	0	0	0	0	0	0	0	0	0	0	0	0	0	0	0	0	0	0	0	1	1	3	0	0	0	0	0	1	0	0	0	0	0	0	0	0	0
A0A0H3N7U4	A0A0H3N7U4	2	2	2	tr|A0A0H3N7U4|A0A0H3N7U4_SALTS Hypothetical release factor OS=Salmonella typhimurium (strain SL1344) OX=216597 GN=yaeJ PE=4 SV=1	1	2	2	2	1	1	1	1	1	1	1	1	1	1	1	1	1	1	0	0	0	1	1	1	0	0	0	0	0	0	0	0	0	0	0	0	0	0	0	0	0	0	0	1
A0A0H3N7V0	A0A0H3N7V0	17	17	17	tr|A0A0H3N7V0|A0A0H3N7V0_SALTS Lipoprotein OS=Salmonella typhimurium (strain SL1344) OX=216597 GN=metQ PE=3 SV=1	1	17	17	17	13	11	6	5	6	7	9	8	8	12	13	10	12	10	12	10	10	12	7	6	12	5	7	5	4	1	1	1	3	4	5	3	2	4	3	3	3	2	4	8
A0A0H3N7V2	A0A0H3N7V2	10	10	10	tr|A0A0H3N7V2|A0A0H3N7V2_SALTS 4-hydroxythreonine-4-phosphate dehydrogenase OS=Salmonella typhimurium (strain SL1344) OX=216597 GN=pdxAa PE=3 SV=1	1	10	10	10	7	9	8	6	4	1	1	1	0	0	0	0	0	0	0	0	0	0	0	0	0	3	2	3	6	2	1	1	0	0	0	0	0	0	0	0	0	0	0	0
A0A0H3N7V5	A0A0H3N7V5	8	8	8	tr|A0A0H3N7V5|A0A0H3N7V5_SALTS Hypothetical transcriptional regulator OS=Salmonella typhimurium (strain SL1344) OX=216597 GN=yafC PE=4 SV=1	1	8	8	8	0	0	3	4	4	4	6	5	2	0	0	0	0	0	0	0	0	0	0	0	0	0	0	0	0	0	0	0	0	0	0	0	0	0	0	0	0	0	0	0
A0A0H3N7V6	A0A0H3N7V6	56	56	56	tr|A0A0H3N7V6|A0A0H3N7V6_SALTS RNA polymerase-associated protein RapA OS=Salmonella typhimurium (strain SL1344) OX=216597 GN=hepA PE=3 SV=1	1	56	56	56	1	1	1	8	43	44	44	43	40	34	29	13	10	3	1	0	0	0	0	0	0	4	0	0	0	0	17	26	30	25	22	17	17	12	10	10	5	0	0	0
A0A0H3N7W0	A0A0H3N7W0	14	14	14	tr|A0A0H3N7W0|A0A0H3N7W0_SALTS Hydroxyacylglutathione hydrolase OS=Salmonella typhimurium (strain SL1344) OX=216597 GN=gloB PE=3 SV=1	1	14	14	14	13	12	6	4	3	1	0	0	0	0	0	0	0	0	0	0	0	0	0	0	0	0	3	3	8	1	0	0	0	0	0	0	0	0	0	0	0	0	0	0
A0A0H3N7W4	A0A0H3N7W4	6	6	6	tr|A0A0H3N7W4|A0A0H3N7W4_SALTS L-arabinose isomerase OS=Salmonella typhimurium (strain SL1344) OX=216597 GN=araA PE=3 SV=1	1	6	6	6	0	0	0	2	4	3	1	0	0	0	0	0	1	1	0	0	0	0	0	0	0	0	0	0	0	0	0	0	0	0	0	0	0	0	0	1	1	1	1	1
A0A0H3N7X7	A0A0H3N7X7	7	7	7	tr|A0A0H3N7X7|A0A0H3N7X7_SALTS 3-isopropylmalate dehydrogenase OS=Salmonella typhimurium (strain SL1344) OX=216597 GN=leuB PE=3 SV=1	1	7	7	7	2	2	5	4	3	1	1	0	0	0	0	0	0	0	0	0	0	0	0	0	0	3	2	2	2	2	1	1	0	0	0	0	0	0	0	0	0	0	0	0
A0A0H3N7Y4	A0A0H3N7Y4	7	7	7	tr|A0A0H3N7Y4|A0A0H3N7Y4_SALTS Acetolactate synthase isozyme III small subunit OS=Salmonella typhimurium (strain SL1344) OX=216597 GN=ilvH PE=4 SV=1	1	7	7	7	6	6	5	3	1	0	0	0	0	0	0	0	0	0	0	0	0	0	0	0	0	1	1	1	4	1	0	0	0	0	0	0	0	0	0	0	0	0	0	0
A0A0H3N7Y6	A0A0H3N7Y6	9	9	9	tr|A0A0H3N7Y6|A0A0H3N7Y6_SALTS Peptidoglycan D,D-transpeptidase FtsI OS=Salmonella typhimurium (strain SL1344) OX=216597 GN=ftsI PE=3 SV=1	1	9	9	9	1	1	1	0	0	0	0	0	0	0	0	0	0	0	0	0	0	0	0	0	6	0	0	0	0	0	0	0	0	0	0	0	0	0	0	0	0	0	0	0
A0A0H3N7Z5	A0A0H3N7Z5	20	20	20	tr|A0A0H3N7Z5|A0A0H3N7Z5_SALTS Cell division protein FtsA OS=Salmonella typhimurium (strain SL1344) OX=216597 GN=ftsA PE=3 SV=1	1	20	20	20	10	10	7	5	3	5	5	3	4	1	2	4	2	2	1	1	0	1	0	0	3	5	4	5	4	2	1	1	2	2	2	2	3	3	4	2	3	3	3	1
A0A0H3N7Z6	A0A0H3N7Z6	8	8	8	tr|A0A0H3N7Z6|A0A0H3N7Z6_SALTS Uncharacterized protein OS=Salmonella typhimurium (strain SL1344) OX=216597 GN=yafJ PE=4 SV=1	1	8	8	8	5	7	5	2	1	0	1	0	0	0	0	0	0	0	0	0	0	0	0	0	0	0	2	2	2	0	0	0	0	0	0	0	0	0	0	0	0	0	0	0
A0A0H3N7Z9	A0A0H3N7Z9	9	9	9	tr|A0A0H3N7Z9|A0A0H3N7Z9_SALTS 7,8-dihydro-8-oxoguanine-triphosphatase OS=Salmonella typhimurium (strain SL1344) OX=216597 GN=mutT PE=3 SV=1	1	9	9	9	7	4	4	1	0	0	0	0	0	0	0	0	0	0	0	0	0	0	0	0	0	2	4	3	1	1	0	0	0	0	0	0	0	0	0	0	0	0	0	0
A0A0H3N800	A0A0H3N800	9	9	9	tr|A0A0H3N800|A0A0H3N800_SALTS Xanthine phosphoribosyltransferase OS=Salmonella typhimurium (strain SL1344) OX=216597 GN=gpt PE=3 SV=1	1	9	9	9	9	8	8	7	6	7	5	5	3	3	3	0	3	0	0	0	0	0	0	0	0	4	5	7	9	7	6	5	3	2	2	1	1	1	1	0	0	0	0	0
A0A0H3N804	A0A0H3N804	24	24	24	tr|A0A0H3N804|A0A0H3N804_SALTS Gamma-glutamyl phosphate reductase OS=Salmonella typhimurium (strain SL1344) OX=216597 GN=proA PE=3 SV=1	1	24	24	24	1	12	20	21	16	18	15	14	10	4	1	1	0	0	0	0	0	0	0	0	0	4	0	3	17	9	7	6	3	2	3	1	1	0	0	0	0	0	0	0
A0A0H3N826	A0A0H3N826	9	9	9	tr|A0A0H3N826|A0A0H3N826_SALTS Polyamine aminopropyltransferase OS=Salmonella typhimurium (strain SL1344) OX=216597 GN=speE PE=3 SV=1	1	9	9	9	7	7	7	6	6	6	6	4	1	2	2	1	0	0	0	0	0	0	0	0	0	1	4	4	6	5	4	4	4	3	3	1	1	0	0	1	1	0	0	0
A0A0H3N830	A0A0H3N830	15	15	15	tr|A0A0H3N830|A0A0H3N830_SALTS Carbonic anhydrase OS=Salmonella typhimurium (strain SL1344) OX=216597 GN=yadF PE=3 SV=1	1	15	15	15	8	11	13	13	12	8	8	8	6	6	6	2	2	1	1	1	0	0	0	0	1	3	4	5	13	5	4	4	4	3	3	2	1	0	0	0	0	0	0	0
A0A0H3N834	A0A0H3N834	3	3	3	tr|A0A0H3N834|A0A0H3N834_SALTS Hypothetical metal-binding transport protein OS=Salmonella typhimurium (strain SL1344) OX=216597 GN=SL1344_0350 PE=4 SV=1	1	3	3	3	2	2	2	1	0	0	0	0	0	0	0	0	0	0	0	0	0	0	0	0	0	2	3	2	0	1	0	0	0	0	0	0	0	0	0	0	0	0	0	0
A0A0H3N842	A0A0H3N842	18	18	18	tr|A0A0H3N842|A0A0H3N842_SALTS Pantothenate synthetase OS=Salmonella typhimurium (strain SL1344) OX=216597 GN=panC PE=3 SV=1	1	18	18	18	16	18	16	11	9	10	8	5	2	3	1	0	0	0	0	0	0	0	0	0	0	3	7	7	13	6	4	2	0	0	1	1	0	0	0	0	0	0	0	0
A0A0H3N846	A0A0H3N846	5	5	5	tr|A0A0H3N846|A0A0H3N846_SALTS Probable secreted protein OS=Salmonella typhimurium (strain SL1344) OX=216597 GN=yahO PE=4 SV=1	1	5	5	5	5	5	4	3	3	2	2	0	0	0	0	0	0	0	0	0	0	0	0	0	0	0	3	3	4	1	1	0	0	1	1	1	1	0	0	0	0	0	0	0
A0A0H3N847	A0A0H3N847	17	17	17	tr|A0A0H3N847|A0A0H3N847_SALTS RNA polymerase-binding transcription factor DksA OS=Salmonella typhimurium (strain SL1344) OX=216597 GN=dksA PE=3 SV=1	1	17	17	17	15	11	10	8	7	6	6	4	5	4	4	2	2	1	1	1	1	0	0	0	0	7	12	8	11	6	6	4	5	4	5	3	4	3	3	2	2	1	0	0
A0A0H3N850	A0A0H3N850	2	2	2	tr|A0A0H3N850|A0A0H3N850_SALTS PrpE protein OS=Salmonella typhimurium (strain SL1344) OX=216597 GN=prpE PE=4 SV=1	1	2	2	2	0	2	0	0	0	0	0	0	0	0	0	0	0	0	0	0	0	0	0	0	0	0	0	0	0	0	0	0	0	0	0	0	0	0	0	0	0	0	0	0
A0A0H3N855	A0A0H3N855	1	1	1	tr|A0A0H3N855|A0A0H3N855_SALTS Probable ABC-transporter inner membrane protein SbmA OS=Salmonella typhimurium (strain SL1344) OX=216597 GN=sbmA PE=4 SV=1	1	1	1	1	0	0	0	0	0	0	0	0	0	0	0	0	0	0	0	0	0	0	0	0	1	0	0	0	0	0	0	0	0	0	0	0	0	0	0	0	0	0	0	0
A0A0H3N866	A0A0H3N866	11	11	11	tr|A0A0H3N866|A0A0H3N866_SALTS Pyrroline-5-carboxylate reductase OS=Salmonella typhimurium (strain SL1344) OX=216597 GN=proC PE=3 SV=1	1	11	11	11	0	1	8	9	9	9	9	6	5	5	5	0	0	0	0	0	0	0	0	0	0	1	0	0	7	4	4	5	3	2	2	2	1	0	0	0	0	0	0	0
A0A0H3N869	A0A0H3N869	12	12	12	tr|A0A0H3N869|A0A0H3N869_SALTS 5-methylthioadenosine/S-adenosylhomocysteine nucleosidase OS=Salmonella typhimurium (strain SL1344) OX=216597 GN=mtn PE=3 SV=1	1	12	12	12	10	10	8	7	7	6	3	2	0	0	0	0	0	0	0	0	0	0	0	0	0	3	8	9	10	8	7	7	6	6	4	3	3	0	0	0	0	0	0	0
A0A0H3N873	A0A0H3N873	4	4	4	tr|A0A0H3N873|A0A0H3N873_SALTS Pyrimidine/purine nucleoside phosphorylase OS=Salmonella typhimurium (strain SL1344) OX=216597 GN=yaiE PE=3 SV=1	1	4	4	4	4	4	4	4	2	2	1	1	1	1	0	0	0	0	0	0	0	0	0	0	0	1	1	1	3	1	1	1	1	1	1	1	1	0	0	0	0	0	0	0
A0A0H3N876	A0A0H3N876	5	5	5	tr|A0A0H3N876|A0A0H3N876_SALTS Nuclease SbcCD subunit D OS=Salmonella typhimurium (strain SL1344) OX=216597 GN=sbcD PE=3 SV=1	1	5	5	5	5	3	3	0	0	0	0	0	0	0	0	0	0	0	0	0	0	0	0	0	0	0	0	0	0	0	0	0	0	0	0	0	0	0	0	0	0	0	0	0
A0A0H3N881	A0A0H3N881	3	3	3	tr|A0A0H3N881|A0A0H3N881_SALTS Maltodextrin glucosidase OS=Salmonella typhimurium (strain SL1344) OX=216597 GN=malZ PE=3 SV=1	1	3	3	3	1	1	1	1	1	1	2	2	1	0	0	0	0	0	0	0	0	0	0	0	0	0	0	0	0	0	0	0	0	0	0	0	0	0	0	0	0	0	0	0
A0A0H3N884	A0A0H3N884	34	34	34	tr|A0A0H3N884|A0A0H3N884_SALTS Elongation factor Ts OS=Salmonella typhimurium (strain SL1344) OX=216597 GN=tsf PE=3 SV=1	1	34	34	34	31	31	31	28	27	24	25	23	21	19	19	7	15	5	7	4	2	4	2	2	10	17	24	29	32	28	20	18	17	11	11	11	10	11	7	7	8	5	4	6
A0A0H3N891	A0A0H3N891	9	9	9	tr|A0A0H3N891|A0A0H3N891_SALTS 3-hydroxyacyl-[acyl-carrier-protein] dehydratase FabZ OS=Salmonella typhimurium (strain SL1344) OX=216597 GN=fabZ PE=3 SV=1	1	9	9	9	3	5	6	5	5	3	3	3	3	2	1	0	0	0	0	0	0	1	0	0	1	3	0	3	5	3	3	2	1	1	1	0	0	0	0	0	0	0	1	0
A0A0H3N894	A0A0H3N894	24	24	24	tr|A0A0H3N894|A0A0H3N894_SALTS Acetyl-coenzyme A carboxylase carboxyl transferase subunit alpha OS=Salmonella typhimurium (strain SL1344) OX=216597 GN=accA PE=3 SV=1	1	24	24	24	8	17	20	21	19	17	18	17	16	11	11	5	2	1	0	0	0	2	1	3	6	9	2	10	20	11	9	11	8	8	6	5	4	3	2	3	2	2	2	0
A0A0H3N8A2	A0A0H3N8A2	6	6	6	tr|A0A0H3N8A2|A0A0H3N8A2_SALTS ROF protein OS=Salmonella typhimurium (strain SL1344) OX=216597 GN=rof PE=4 SV=1	1	6	6	6	5	5	6	5	3	2	2	2	1	1	1	0	0	1	1	1	0	0	0	0	0	2	3	3	6	2	1	2	2	1	1	1	0	1	0	0	1	0	0	0
A0A0H3N8A6	A0A0H3N8A6	6	6	6	tr|A0A0H3N8A6|A0A0H3N8A6_SALTS Hypothetical membrane protein OS=Salmonella typhimurium (strain SL1344) OX=216597 GN=yajC PE=4 SV=1	1	6	6	6	0	0	0	0	0	1	1	2	1	2	2	0	0	0	2	1	1	2	2	0	5	0	0	0	0	0	0	0	0	0	0	0	0	0	0	0	0	0	0	1
A0A0H3N8A8	A0A0H3N8A8	4	4	4	tr|A0A0H3N8A8|A0A0H3N8A8_SALTS Uncharacterized protein OS=Salmonella typhimurium (strain SL1344) OX=216597 GN=yajD PE=4 SV=1	1	4	4	4	4	4	4	4	3	3	3	1	0	0	0	0	0	0	0	0	0	0	0	0	0	0	1	0	4	0	0	0	0	0	0	0	0	0	0	0	0	0	0	0
A0A0H3N8B1	A0A0H3N8B1	9	9	9	tr|A0A0H3N8B1|A0A0H3N8B1_SALTS 6,7-dimethyl-8-ribityllumazine synthase OS=Salmonella typhimurium (strain SL1344) OX=216597 GN=ribH PE=3 SV=1	1	9	9	9	9	9	9	8	9	9	9	8	8	8	6	2	1	0	0	0	0	0	1	0	4	5	8	9	9	7	8	8	7	7	6	6	6	5	5	2	3	1	0	0
A0A0H3N8B3	A0A0H3N8B3	41	41	41	tr|A0A0H3N8B3|A0A0H3N8B3_SALTS Proline--tRNA ligase OS=Salmonella typhimurium (strain SL1344) OX=216597 GN=proS PE=3 SV=1	1	41	41	41	7	27	34	35	34	32	23	16	11	13	13	4	4	1	1	1	1	0	0	0	0	13	12	21	33	23	22	18	15	8	4	3	2	1	1	1	0	0	0	0
A0A0H3N8B6	A0A0H3N8B6	21	21	21	tr|A0A0H3N8B6|A0A0H3N8B6_SALTS 1-deoxy-D-xylulose-5-phosphate synthase OS=Salmonella typhimurium (strain SL1344) OX=216597 GN=dxs PE=3 SV=1	1	21	21	21	0	5	14	13	9	6	14	17	19	16	10	5	3	2	3	1	1	0	0	1	1	2	0	1	10	2	1	1	1	4	4	2	2	1	0	0	0	0	0	0
A0A0H3N8B8	A0A0H3N8B8	4	4	4	tr|A0A0H3N8B8|A0A0H3N8B8_SALTS Methionine import ATP-binding protein MetN OS=Salmonella typhimurium (strain SL1344) OX=216597 GN=abc PE=3 SV=1	1	4	4	4	0	0	0	0	0	0	0	0	0	0	0	0	0	0	0	0	0	0	0	0	2	1	1	0	0	0	0	0	0	0	0	0	0	0	0	0	0	0	0	0
A0A0H3N8C3	A0A0H3N8C3	7	7	7	tr|A0A0H3N8C3|A0A0H3N8C3_SALTS UPF0294 protein YafD OS=Salmonella typhimurium (strain SL1344) OX=216597 GN=yafD PE=3 SV=1	1	7	7	7	0	0	0	0	0	0	7	7	7	7	5	2	1	1	0	0	0	0	0	0	0	0	0	0	0	0	0	0	1	2	2	2	2	1	1	0	0	0	0	0
A0A0H3N8C8	A0A0H3N8C8	6	6	6	tr|A0A0H3N8C8|A0A0H3N8C8_SALTS Ribonuclease H OS=Salmonella typhimurium (strain SL1344) OX=216597 GN=rnhA PE=3 SV=1	1	6	6	6	6	6	2	1	1	1	1	1	0	0	0	0	0	0	0	0	0	0	0	0	0	0	1	1	1	0	0	0	0	0	0	0	0	0	0	0	0	0	0	0
A0A0H3N8D3	A0A0H3N8D3	5	5	5	tr|A0A0H3N8D3|A0A0H3N8D3_SALTS Cytochrome o ubiquinol oxidase subunit I OS=Salmonella typhimurium (strain SL1344) OX=216597 GN=cyoB PE=3 SV=1	1	5	5	5	0	0	1	1	1	1	1	1	1	1	1	1	2	1	0	0	0	1	0	0	4	0	0	0	0	0	0	0	0	0	0	0	0	1	1	1	0	0	0	0
A0A0H3N8D8	A0A0H3N8D8	52	52	52	tr|A0A0H3N8D8|A0A0H3N8D8_SALTS Trigger factor OS=Salmonella typhimurium (strain SL1344) OX=216597 GN=tig PE=3 SV=1	1	52	52	52	41	42	38	41	41	42	42	40	41	40	40	23	33	21	21	17	15	20	18	11	21	23	27	31	40	30	25	26	29	26	24	22	20	17	16	17	17	14	13	23
A0A0H3N8E3	A0A0H3N8E3	29	29	29	tr|A0A0H3N8E3|A0A0H3N8E3_SALTS Peptidylprolyl isomerase OS=Salmonella typhimurium (strain SL1344) OX=216597 GN=cypD PE=4 SV=1	1	29	29	29	0	0	0	0	0	0	0	0	0	0	2	1	7	3	7	4	6	4	2	0	25	0	0	0	0	0	0	0	0	0	0	0	0	0	0	0	0	0	0	1
A0A0H3N8G7	A0A0H3N8G7	5	5	5	sp|A0A0H3N8G7|HHA_SALTS Hemolysin expression-modulating protein Hha OS=Salmonella typhimurium (strain SL1344) OX=216597 GN=hha PE=3 SV=1	1	5	5	5	5	4	2	1	0	0	0	0	0	0	0	0	0	0	0	0	0	0	0	0	0	1	1	0	0	0	0	0	0	0	0	0	0	0	0	0	0	0	0	0
A0A0H3N8H1	A0A0H3N8H1	13	13	13	tr|A0A0H3N8H1|A0A0H3N8H1_SALTS Possible hydrolase OS=Salmonella typhimurium (strain SL1344) OX=216597 GN=yafV PE=4 SV=1	1	13	13	13	9	10	11	7	6	2	2	0	0	0	0	0	0	0	0	0	0	0	0	0	0	5	5	5	8	4	3	2	1	0	0	0	0	0	0	0	0	0	0	0
A0A0H3N8H3	A0A0H3N8H3	6	6	6	tr|A0A0H3N8H3|A0A0H3N8H3_SALTS Integral membrane protein AefA OS=Salmonella typhimurium (strain SL1344) OX=216597 GN=aefA PE=4 SV=1	1	6	6	6	1	0	0	0	0	0	0	0	0	0	0	1	0	0	0	0	0	1	0	0	5	0	0	0	0	0	0	0	0	0	0	0	0	0	0	0	0	0	0	0
A0A0H3N8H7	A0A0H3N8H7	2	2	2	tr|A0A0H3N8H7|A0A0H3N8H7_SALTS DNA polymerase IV OS=Salmonella typhimurium (strain SL1344) OX=216597 GN=dbh PE=3 SV=1	1	2	2	2	1	1	1	1	1	1	1	1	0	0	0	0	0	0	0	0	0	0	0	0	0	0	0	1	1	1	0	0	0	0	0	0	0	0	0	0	0	0	0	0
A0A0H3N8H8	A0A0H3N8H8	20	20	20	tr|A0A0H3N8H8|A0A0H3N8H8_SALTS DNA polymerase III subunit gamma/tau OS=Salmonella typhimurium (strain SL1344) OX=216597 GN=dnaX PE=3 SV=1	1	20	20	20	1	3	6	9	9	10	7	3	2	1	1	1	0	1	2	2	0	1	1	0	0	1	0	0	2	1	1	2	2	1	0	0	0	0	0	0	1	0	0	1
A0A0H3N8I2	A0A0H3N8I2	13	13	13	tr|A0A0H3N8I2|A0A0H3N8I2_SALTS Sigma factor-binding protein Crl OS=Salmonella typhimurium (strain SL1344) OX=216597 GN=crl PE=3 SV=1	1	13	13	13	11	8	5	4	5	5	4	3	2	3	2	0	0	0	0	0	0	0	0	0	1	0	7	8	6	2	2	1	1	0	0	0	0	0	0	0	0	0	0	0
A0A0H3N8I3	A0A0H3N8I3	9	9	9	tr|A0A0H3N8I3|A0A0H3N8I3_SALTS Ferrochelatase OS=Salmonella typhimurium (strain SL1344) OX=216597 GN=hemH PE=3 SV=1	1	9	9	9	0	1	2	1	3	3	5	5	4	5	3	3	4	3	3	2	1	2	1	0	3	0	0	0	1	0	0	0	0	1	1	1	1	1	1	0	1	0	1	2
A0A0H3N8I7	A0A0H3N8I7	9	9	9	tr|A0A0H3N8I7|A0A0H3N8I7_SALTS Uncharacterized protein OS=Salmonella typhimurium (strain SL1344) OX=216597 GN=SL1344_0322 PE=4 SV=1	1	9	9	9	9	8	6	5	5	2	2	1	1	0	0	0	0	0	0	0	0	0	0	0	0	2	4	2	5	1	1	1	1	1	1	1	1	1	1	1	1	0	0	0
A0A0H3N8I8	A0A0H3N8I8	21	21	21	tr|A0A0H3N8I8|A0A0H3N8I8_SALTS UDP-sugar hydrolase OS=Salmonella typhimurium (strain SL1344) OX=216597 GN=ushA PE=3 SV=1	1	21	21	21	16	17	14	12	11	10	9	7	6	7	3	1	1	0	0	0	0	1	1	1	0	5	8	9	13	4	5	4	4	1	0	1	0	0	0	0	0	0	0	0
A0A0H3N8J4	A0A0H3N8J4	4	4	4	tr|A0A0H3N8J4|A0A0H3N8J4_SALTS Copper efflux regulator OS=Salmonella typhimurium (strain SL1344) OX=216597 GN=cueR PE=4 SV=1	1	4	4	4	4	3	2	1	1	0	0	0	0	0	0	0	0	0	0	0	0	0	0	0	0	0	0	0	0	0	0	0	0	0	0	0	0	0	0	0	0	0	0	0
A0A0H3N8J9	A0A0H3N8J9	17	17	17	tr|A0A0H3N8J9|A0A0H3N8J9_SALTS Thioredoxin-like protein OS=Salmonella typhimurium (strain SL1344) OX=216597 GN=ybbN PE=4 SV=1	1	17	17	17	12	11	11	11	11	16	15	15	15	13	11	5	3	2	0	0	0	0	0	0	0	5	3	3	8	4	7	9	10	11	10	9	6	4	2	2	2	1	0	0
A0A0H3N8L4	A0A0H3N8L4	28	28	28	tr|A0A0H3N8L4|A0A0H3N8L4_SALTS Type III restriction-modification system enzyme (StyLTI) modification methylase OS=Salmonella typhimurium (strain SL1344) OX=216597 GN=mod PE=4 SV=1	1	28	28	28	0	0	17	24	21	24	21	15	13	13	11	3	1	0	0	0	0	0	0	0	0	1	0	0	14	9	10	11	11	9	5	4	2	0	0	0	0	0	0	0
A0A0H3N8M8	A0A0H3N8M8	1	1	1	tr|A0A0H3N8M8|A0A0H3N8M8_SALTS UDP-2,3-diacylglucosamine hydrolase OS=Salmonella typhimurium (strain SL1344) OX=216597 GN=lpxH PE=3 SV=1	1	1	1	1	0	0	0	0	0	0	0	0	0	0	0	1	0	0	0	0	0	0	0	0	0	0	0	0	0	0	0	0	0	0	0	0	0	0	0	0	0	0	0	0
A0A0H3N8M9	A0A0H3N8M9	3	3	3	tr|A0A0H3N8M9|A0A0H3N8M9_SALTS 2-methylisocitrate lyase OS=Salmonella typhimurium (strain SL1344) OX=216597 GN=prpB PE=3 SV=1	1	3	3	3	0	0	1	0	1	0	1	0	0	0	0	0	0	0	0	0	0	0	0	0	0	0	0	0	1	0	0	0	0	0	0	0	0	0	0	0	0	0	0	0
A0A0H3N8P5	A0A0H3N8P5	5	5	5	tr|A0A0H3N8P5|A0A0H3N8P5_SALTS Anti-adapter protein IraP OS=Salmonella typhimurium (strain SL1344) OX=216597 GN=yaiB PE=3 SV=1	1	5	5	5	5	5	5	4	4	4	4	2	2	2	0	1	0	0	0	0	0	0	0	0	1	2	3	3	4	2	2	2	2	2	1	1	1	1	1	1	1	1	1	1
A0A0H3N8Q0	A0A0H3N8Q0	5	5	5	tr|A0A0H3N8Q0|A0A0H3N8Q0_SALTS Shikimate kinase 2 OS=Salmonella typhimurium (strain SL1344) OX=216597 GN=aroL PE=3 SV=1	1	5	5	5	3	1	0	0	0	0	0	0	0	0	0	0	0	0	0	0	0	0	0	0	0	0	0	0	0	0	0	0	0	0	0	0	0	0	0	0	0	0	0	0
A0A0H3N8Q3	A0A0H3N8Q3	10	10	10	tr|A0A0H3N8Q3|A0A0H3N8Q3_SALTS Uncharacterized protein OS=Salmonella typhimurium (strain SL1344) OX=216597 GN=SL1344_0555 PE=4 SV=1	1	10	10	10	5	6	5	1	1	1	1	1	0	0	0	0	0	0	0	0	0	0	0	0	0	0	1	1	1	1	1	0	0	0	1	1	0	0	0	0	0	0	0	0
A0A0H3N8Q7	A0A0H3N8Q7	18	18	18	tr|A0A0H3N8Q7|A0A0H3N8Q7_SALTS UPF0246 protein YaaA OS=Salmonella typhimurium (strain SL1344) OX=216597 GN=yaaA PE=3 SV=1	1	18	18	18	17	15	14	11	9	1	1	1	1	0	0	0	0	0	0	0	0	0	0	0	0	2	5	4	11	3	2	1	1	1	1	1	0	0	0	0	0	0	0	0
A0A0H3N8Q8	A0A0H3N8Q8	8	8	8	tr|A0A0H3N8Q8|A0A0H3N8Q8_SALTS Hypothetical ROK-family protein OS=Salmonella typhimurium (strain SL1344) OX=216597 GN=yajF PE=4 SV=1	1	8	8	8	4	6	7	6	6	3	1	0	0	0	0	0	0	0	0	0	0	0	0	0	0	1	1	1	5	0	1	0	0	0	0	0	0	0	0	0	0	0	0	0
A0A0H3N8R3	A0A0H3N8R3	2	2	2	tr|A0A0H3N8R3|A0A0H3N8R3_SALTS Phosphate regulon sensor protein PhoR OS=Salmonella typhimurium (strain SL1344) OX=216597 GN=phoR PE=4 SV=1	1	2	2	2	0	0	0	0	0	0	0	0	0	0	0	0	0	0	0	0	0	0	0	0	2	0	0	0	0	0	0	0	0	0	0	0	0	0	0	0	0	0	0	0
A0A0H3N8S6	A0A0H3N8S6	7	7	7	tr|A0A0H3N8S6|A0A0H3N8S6_SALTS Isochorismatase OS=Salmonella typhimurium (strain SL1344) OX=216597 GN=entB PE=4 SV=1	1	7	7	7	5	7	5	3	2	1	1	0	0	0	0	0	0	0	0	0	0	0	0	0	0	0	2	1	5	0	0	0	0	0	0	0	0	0	0	0	0	0	0	0
A0A0H3N8S8	A0A0H3N8S8	5	5	5	tr|A0A0H3N8S8|A0A0H3N8S8_SALTS Hypothetical oxidoreductase OS=Salmonella typhimurium (strain SL1344) OX=216597 GN=ybdH PE=4 SV=1	1	5	5	5	1	4	3	2	2	0	0	0	0	0	0	0	0	0	0	0	0	0	1	1	1	0	0	0	0	0	0	0	0	0	0	0	0	1	1	0	0	0	0	0
A0A0H3N8T4	A0A0H3N8T4	13	13	13	tr|A0A0H3N8T4|A0A0H3N8T4_SALTS Thiol:disulfide interchange protein OS=Salmonella typhimurium (strain SL1344) OX=216597 GN=dsbG PE=3 SV=1	1	13	13	13	12	12	9	9	7	5	2	2	2	1	1	0	0	0	0	0	0	0	0	0	0	2	2	3	7	1	2	0	0	0	0	0	0	0	0	0	0	0	0	0
A0A0H3N8U0	A0A0H3N8U0	14	14	14	tr|A0A0H3N8U0|A0A0H3N8U0_SALTS Ribonuclease I OS=Salmonella typhimurium (strain SL1344) OX=216597 GN=rna PE=3 SV=1	1	14	14	14	0	0	0	0	0	0	1	1	5	7	7	10	8	6	4	6	4	12	11	6	10	2	0	0	0	0	0	0	0	0	8	10	9	10	9	8	6	6	8	12
A0A0H3N8U8	A0A0H3N8U8	17	17	17	tr|A0A0H3N8U8|A0A0H3N8U8_SALTS 4-hydroxy-3-methylbut-2-enyl diphosphate reductase OS=Salmonella typhimurium (strain SL1344) OX=216597 GN=ispH PE=3 SV=1	1	17	17	17	13	11	7	6	3	2	1	0	0	0	0	0	0	0	0	0	0	0	0	0	0	3	7	7	11	3	2	3	3	1	1	1	0	0	0	0	0	0	0	0
A0A0H3N8V0	A0A0H3N8V0	2	2	2	tr|A0A0H3N8V0|A0A0H3N8V0_SALTS Protein-export membrane protein SecF OS=Salmonella typhimurium (strain SL1344) OX=216597 GN=secF PE=3 SV=1	1	2	2	2	0	0	0	0	0	0	0	0	0	0	0	0	0	0	0	1	1	0	0	0	1	0	0	0	0	0	0	0	0	0	0	0	0	0	0	0	0	0	0	0
A0A0H3N8V7	A0A0H3N8V7	16	15	15	tr|A0A0H3N8V7|A0A0H3N8V7_SALTS D-alanine carboxypeptidase OS=Salmonella typhimurium (strain SL1344) OX=216597 GN=dacA PE=3 SV=1	1	16	15	15	0	0	0	0	1	1	3	3	6	4	3	0	2	2	1	1	1	2	0	0	14	1	0	0	0	0	0	0	0	0	0	0	0	0	2	2	1	1	1	1
A0A0H3N8V9	A0A0H3N8V9	12	12	12	tr|A0A0H3N8V9|A0A0H3N8V9_SALTS Thiamine-monophosphate kinase OS=Salmonella typhimurium (strain SL1344) OX=216597 GN=thiL PE=3 SV=1	1	12	12	12	6	6	5	6	4	3	2	0	0	0	0	0	0	0	0	0	0	0	0	0	0	2	4	6	6	6	5	4	4	2	2	2	1	1	1	0	0	0	0	0
A0A0H3N8W2	A0A0H3N8W2	7	7	7	tr|A0A0H3N8W2|A0A0H3N8W2_SALTS Ribosomal silencing factor RsfS OS=Salmonella typhimurium (strain SL1344) OX=216597 GN=ybeB PE=3 SV=1	1	7	7	7	1	2	2	2	5	5	6	6	6	6	6	4	5	4	5	2	1	1	0	0	0	1	0	0	0	0	0	0	0	0	0	0	0	2	3	5	5	5	5	6
A0A0H3N8W3	A0A0H3N8W3	4	4	4	tr|A0A0H3N8W3|A0A0H3N8W3_SALTS Exodeoxyribonuclease 7 small subunit OS=Salmonella typhimurium (strain SL1344) OX=216597 GN=xseB PE=3 SV=1	1	4	4	4	2	1	1	2	3	3	4	4	4	3	4	2	1	0	0	0	0	0	0	0	0	1	2	3	2	1	1	3	3	3	4	2	1	2	0	0	0	0	0	0
A0A0H3N8W6	A0A0H3N8W6	15	15	15	tr|A0A0H3N8W6|A0A0H3N8W6_SALTS Carbamoyl-phosphate synthase small chain OS=Salmonella typhimurium (strain SL1344) OX=216597 GN=carA PE=3 SV=1	1	15	15	15	0	3	9	10	8	7	3	1	1	1	1	0	0	0	0	0	0	0	0	0	0	1	0	0	7	4	3	4	3	1	0	0	0	0	0	0	0	0	0	0
A0A0H3N8W7	A0A0H3N8W7	2	2	2	tr|A0A0H3N8W7|A0A0H3N8W7_SALTS LPS-assembly lipoprotein LptE OS=Salmonella typhimurium (strain SL1344) OX=216597 GN=rlpB PE=3 SV=1	1	2	2	2	0	0	0	0	0	0	0	0	1	0	0	0	1	1	1	1	1	1	0	0	2	0	0	0	0	0	0	0	0	0	0	0	0	0	0	0	0	0	0	0
A0A0H3N8X4	A0A0H3N8X4	7	7	7	tr|A0A0H3N8X4|A0A0H3N8X4_SALTS 2-dehydropantoate 2-reductase OS=Salmonella typhimurium (strain SL1344) OX=216597 GN=apbA PE=3 SV=1	1	7	7	7	6	5	2	0	0	0	0	0	1	0	0	0	0	0	0	0	0	0	0	0	0	1	1	1	2	1	0	0	0	0	0	0	0	0	0	0	0	0	0	0
A0A0H3N8X7	A0A0H3N8X7	3	3	3	tr|A0A0H3N8X7|A0A0H3N8X7_SALTS YbeV protein OS=Salmonella typhimurium (strain SL1344) OX=216597 GN=ybeV PE=4 SV=1	1	3	3	3	0	0	0	1	1	1	1	1	1	1	1	1	1	1	1	1	1	1	0	1	0	0	0	0	0	0	0	0	0	0	0	0	0	0	0	0	0	0	0	0
A0A0H3N8Y3	A0A0H3N8Y3	5	5	5	tr|A0A0H3N8Y3|A0A0H3N8Y3_SALTS Probable secreted protein OS=Salmonella typhimurium (strain SL1344) OX=216597 GN=SL1344_0083 PE=4 SV=1	1	5	5	5	5	3	2	0	1	0	1	0	0	0	0	0	0	0	0	0	0	0	0	0	0	0	3	3	2	0	0	0	0	0	0	0	0	0	0	0	0	0	0	0
A0A0H3N8Y7	A0A0H3N8Y7	5	5	5	tr|A0A0H3N8Y7|A0A0H3N8Y7_SALTS Endoribonuclease YbeY OS=Salmonella typhimurium (strain SL1344) OX=216597 GN=ybeY PE=3 SV=1	1	5	5	5	5	3	3	2	2	1	0	1	0	0	0	0	0	0	0	0	0	0	0	0	0	2	4	4	4	2	1	1	1	0	0	0	0	0	0	0	0	0	0	0
A0A0H3N8Y8	A0A0H3N8Y8	32	32	32	tr|A0A0H3N8Y8|A0A0H3N8Y8_SALTS ATP-dependent Clp protease ATP-binding subunit ClpX OS=Salmonella typhimurium (strain SL1344) OX=216597 GN=clpX PE=3 SV=1	1	32	32	32	25	26	26	26	22	21	18	18	17	14	16	5	10	2	11	5	7	11	2	2	13	11	10	14	20	10	9	6	7	6	5	5	6	5	4	4	4	3	2	5
A0A0H3N8Y9	A0A0H3N8Y9	7	7	7	tr|A0A0H3N8Y9|A0A0H3N8Y9_SALTS Bis(5-nucleosyl)-tetraphosphatase, symmetrical OS=Salmonella typhimurium (strain SL1344) OX=216597 GN=apaH PE=3 SV=1	1	7	7	7	7	7	4	2	1	1	0	0	0	0	0	0	0	0	0	0	0	0	0	0	0	1	1	1	4	1	0	0	0	0	0	0	0	0	0	0	0	0	0	0
A0A0H3N8Z2	A0A0H3N8Z2	36	36	36	tr|A0A0H3N8Z2|A0A0H3N8Z2_SALTS Asparagine synthetase B OS=Salmonella typhimurium (strain SL1344) OX=216597 GN=asnB PE=4 SV=1	1	36	36	36	16	25	25	18	19	13	14	11	8	5	8	2	0	0	0	0	0	0	0	0	0	6	10	15	27	10	10	6	8	4	2	0	0	0	0	0	0	0	0	0
A0A0H3N8Z5	A0A0H3N8Z5	9	9	9	tr|A0A0H3N8Z5|A0A0H3N8Z5_SALTS LPS-assembly protein LptD OS=Salmonella typhimurium (strain SL1344) OX=216597 GN=imp PE=3 SV=1	1	9	9	9	0	0	0	0	0	1	1	1	1	0	1	1	2	0	0	1	1	2	0	0	3	0	0	0	0	0	0	0	0	0	0	0	0	1	0	1	0	0	0	0
A0A0H3N8Z7	A0A0H3N8Z7	3	3	3	tr|A0A0H3N8Z7|A0A0H3N8Z7_SALTS Hypothetical transcriptional regulator OS=Salmonella typhimurium (strain SL1344) OX=216597 GN=ybaO PE=4 SV=1	1	3	3	3	2	1	0	0	0	1	1	1	1	1	1	0	0	0	0	0	0	0	0	0	0	0	0	0	0	0	0	0	0	0	0	0	0	0	0	0	0	0	0	0
A0A0H3N8Z8	A0A0H3N8Z8	11	11	11	tr|A0A0H3N8Z8|A0A0H3N8Z8_SALTS Pts system, N-acetylglucosamine-specific IIABC component OS=Salmonella typhimurium (strain SL1344) OX=216597 GN=nagE PE=4 SV=1	1	11	11	11	0	0	0	0	0	0	0	0	0	0	0	0	1	0	0	0	0	1	0	0	9	1	0	0	0	0	0	0	0	0	0	0	0	0	0	0	0	0	0	0
A0A0H3N902	A0A0H3N902	5	5	5	tr|A0A0H3N902|A0A0H3N902_SALTS Arabinose operon regulatory protein OS=Salmonella typhimurium (strain SL1344) OX=216597 GN=araC PE=4 SV=1	1	5	5	5	5	4	4	3	2	0	0	0	0	0	0	0	0	0	0	0	0	0	0	0	0	0	0	1	3	2	1	1	1	1	1	0	0	0	0	0	0	0	0	0
A0A0H3N904	A0A0H3N904	11	11	11	tr|A0A0H3N904|A0A0H3N904_SALTS Acyl-CoA thioesterase II OS=Salmonella typhimurium (strain SL1344) OX=216597 GN=tesB PE=4 SV=1	1	11	11	11	3	6	8	7	6	3	2	1	0	0	0	0	0	0	0	0	0	0	0	0	0	0	0	3	8	4	4	2	1	1	0	0	0	0	0	0	0	0	0	0
A0A0H3N907	A0A0H3N907	2	2	2	tr|A0A0H3N907|A0A0H3N907_SALTS HTH-type transcriptional regulator SgrR OS=Salmonella typhimurium (strain SL1344) OX=216597 GN=yabN PE=3 SV=1	1	2	2	2	0	0	0	0	0	0	1	1	2	1	1	0	0	0	0	0	0	0	0	0	0	0	0	0	0	0	0	0	0	0	0	0	0	0	0	0	0	0	0	0
A0A0H3N909	A0A0H3N909	4	4	4	tr|A0A0H3N909|A0A0H3N909_SALTS Uncharacterized protein OS=Salmonella typhimurium (strain SL1344) OX=216597 GN=ybfE PE=4 SV=1	1	4	4	4	0	0	0	0	2	4	4	4	4	3	1	1	0	0	0	0	0	0	0	0	0	0	0	0	0	0	0	0	0	0	0	0	0	0	0	0	0	0	0	0
A0A0H3N916;A0A0H3NE82	A0A0H3N916	19;1	19;1	18;1	tr|A0A0H3N916|A0A0H3N916_SALTS Efflux pump membrane transporter OS=Salmonella typhimurium (strain SL1344) OX=216597 GN=acrB PE=3 SV=1	2	19	19	18	0	0	0	0	0	0	0	0	0	0	0	0	1	0	2	2	2	2	0	0	11	1	0	0	0	0	0	0	0	0	0	0	0	0	0	0	0	0	0	0
A0A0H3N919	A0A0H3N919	7	7	7	tr|A0A0H3N919|A0A0H3N919_SALTS Transcriptional regulator MraZ OS=Salmonella typhimurium (strain SL1344) OX=216597 GN=mraZ PE=3 SV=1	1	7	7	7	0	0	3	4	3	6	6	6	6	4	3	1	1	0	0	0	0	0	0	0	0	0	0	0	3	1	1	1	1	1	1	1	1	1	0	0	0	0	0	0
A0A0H3N921	A0A0H3N921	3	3	3	tr|A0A0H3N921|A0A0H3N921_SALTS Uncharacterized protein OS=Salmonella typhimurium (strain SL1344) OX=216597 GN=ybaM PE=4 SV=1	1	3	3	3	1	1	0	0	0	0	0	0	0	0	0	0	0	0	0	0	0	0	0	0	0	0	1	0	0	0	0	0	0	0	0	0	0	0	0	0	0	0	0	0
A0A0H3N924	A0A0H3N924	7	7	7	tr|A0A0H3N924|A0A0H3N924_SALTS Recombination protein RecR OS=Salmonella typhimurium (strain SL1344) OX=216597 GN=recR PE=3 SV=1	1	7	7	7	7	6	5	2	1	1	0	1	0	0	0	0	0	0	0	0	0	0	0	0	0	0	1	0	4	1	1	0	0	0	0	0	0	0	0	0	0	0	0	0
A0A0H3N925	A0A0H3N925	9	9	9	tr|A0A0H3N925|A0A0H3N925_SALTS Uncharacterized protein OS=Salmonella typhimurium (strain SL1344) OX=216597 GN=ybgI PE=4 SV=1	1	9	9	9	0	7	8	7	8	6	6	4	4	1	1	1	0	0	0	0	0	0	0	0	0	2	0	2	8	5	4	4	1	1	1	0	0	0	0	0	0	0	0	0
A0A0H3N926	A0A0H3N926	19	19	19	tr|A0A0H3N926|A0A0H3N926_SALTS UDP-N-acetylmuramoyl-tripeptide--D-alanyl-D-alanine ligase OS=Salmonella typhimurium (strain SL1344) OX=216597 GN=murF PE=3 SV=1	1	19	19	19	15	12	14	12	10	4	5	1	0	0	0	0	0	0	0	0	0	0	0	0	0	4	6	6	11	4	4	2	2	2	1	1	0	0	0	0	0	0	0	0
A0A0H3N928	A0A0H3N928	18	18	18	tr|A0A0H3N928|A0A0H3N928_SALTS Inosine-guanosine kinase OS=Salmonella typhimurium (strain SL1344) OX=216597 GN=gsk PE=4 SV=1	1	18	18	18	3	15	16	14	11	7	6	5	0	1	1	0	0	0	0	0	0	0	0	0	0	1	1	3	12	3	2	2	2	1	0	0	0	0	0	0	0	0	0	0
A0A0H3N932	A0A0H3N932	16	16	16	tr|A0A0H3N932|A0A0H3N932_SALTS UDP-N-acetylmuramate--L-alanine ligase OS=Salmonella typhimurium (strain SL1344) OX=216597 GN=murC PE=3 SV=1	1	16	16	16	7	12	12	10	10	6	5	2	1	1	1	0	0	0	0	0	0	0	0	0	2	4	4	5	14	5	4	4	1	0	0	0	0	0	0	0	0	0	0	0
A0A0H3N937	A0A0H3N937	7	7	7	tr|A0A0H3N937|A0A0H3N937_SALTS Hypothetical membrane protein OS=Salmonella typhimurium (strain SL1344) OX=216597 GN=ybbK PE=4 SV=1	1	7	7	7	0	0	0	0	0	0	0	0	0	0	0	0	0	0	0	0	0	0	0	0	6	0	0	0	0	0	0	0	0	0	0	1	0	0	0	0	0	0	0	0
A0A0H3N939	A0A0H3N939	11	11	11	tr|A0A0H3N939|A0A0H3N939_SALTS UDP-3-O-acyl-N-acetylglucosamine deacetylase OS=Salmonella typhimurium (strain SL1344) OX=216597 GN=lpxC PE=3 SV=1	1	11	11	11	9	10	6	4	3	3	1	0	0	0	0	0	0	0	0	0	0	0	0	0	0	1	2	1	2	0	0	0	0	0	0	0	0	0	0	0	0	0	0	0
A0A0H3N941	A0A0H3N941	10	10	10	tr|A0A0H3N941|A0A0H3N941_SALTS Acyl-coA thioesterase I OS=Salmonella typhimurium (strain SL1344) OX=216597 GN=tesA PE=4 SV=1	1	10	10	10	8	7	6	2	1	1	1	0	0	0	0	0	0	0	0	0	0	0	0	0	0	1	4	3	3	2	2	2	1	0	0	0	0	0	0	0	0	0	0	0
A0A0H3N945	A0A0H3N945	1	1	1	tr|A0A0H3N945|A0A0H3N945_SALTS Succinate dehydrogenase hydrophobic membrane anchor subunit OS=Salmonella typhimurium (strain SL1344) OX=216597 GN=sdhD PE=4 SV=1	1	1	1	1	0	0	0	0	0	0	0	0	0	0	0	0	0	0	0	0	0	0	0	0	1	0	0	0	0	0	0	0	0	0	0	0	0	0	0	0	0	0	0	0
A0A0H3N946	A0A0H3N946	8	8	8	tr|A0A0H3N946|A0A0H3N946_SALTS Cell division protein ZapD OS=Salmonella typhimurium (strain SL1344) OX=216597 GN=yacF PE=3 SV=1	1	8	8	8	6	5	4	2	3	1	1	1	1	1	0	0	0	0	0	0	0	0	0	0	0	5	1	2	3	2	2	2	1	0	0	0	0	0	0	0	0	0	0	0
A0A0H3N949	A0A0H3N949	10	10	10	tr|A0A0H3N949|A0A0H3N949_SALTS Negative regulator of allantoin and glyoxylate utilization operons OS=Salmonella typhimurium (strain SL1344) OX=216597 GN=allR PE=4 SV=1	1	10	10	10	7	8	9	9	8	6	4	5	2	2	1	1	0	0	0	0	0	0	0	0	0	1	1	4	7	4	2	1	1	0	1	0	0	1	0	1	1	1	0	0
A0A0H3N950	A0A0H3N950	34	34	34	tr|A0A0H3N950|A0A0H3N950_SALTS Succinate--CoA ligase [ADP-forming] subunit beta OS=Salmonella typhimurium (strain SL1344) OX=216597 GN=sucC PE=3 SV=1	1	34	34	34	21	25	26	29	28	27	26	24	23	22	22	10	18	8	8	5	5	8	3	3	10	12	10	22	29	24	21	19	18	14	12	10	8	8	6	6	5	2	2	6
A0A0H3N957	A0A0H3N957	118	118	118	tr|A0A0H3N957|A0A0H3N957_SALTS Pyruvate dehydrogenase E1 component OS=Salmonella typhimurium (strain SL1344) OX=216597 GN=aceE PE=4 SV=1	1	118	118	118	3	22	52	64	71	75	71	73	76	77	79	63	101	77	69	44	32	37	29	12	21	24	1	4	44	25	35	51	56	55	52	48	52	49	54	53	46	31	26	39
A0A0H3N958	A0A0H3N958	18	18	18	tr|A0A0H3N958|A0A0H3N958_SALTS Allantoate amidohydrolase OS=Salmonella typhimurium (strain SL1344) OX=216597 GN=allC PE=4 SV=1	1	18	18	18	8	16	10	4	5	4	3	1	0	0	0	0	1	0	0	0	0	0	0	0	0	0	0	1	8	0	0	0	0	0	0	0	0	0	0	0	0	0	0	0
A0A0H3N961	A0A0H3N961	20	20	20	tr|A0A0H3N961|A0A0H3N961_SALTS Tol-Pal system protein TolB OS=Salmonella typhimurium (strain SL1344) OX=216597 GN=tolB PE=3 SV=1	1	20	20	20	20	20	18	16	15	15	15	14	11	9	8	3	6	2	0	0	0	2	0	0	4	5	9	8	17	9	8	6	6	3	3	4	1	3	3	3	2	1	1	0
A0A0H3N962	A0A0H3N962	69	69	69	tr|A0A0H3N962|A0A0H3N962_SALTS Aconitate hydratase B OS=Salmonella typhimurium (strain SL1344) OX=216597 GN=acnB PE=3 SV=1	1	69	69	69	55	62	62	63	57	52	49	44	39	29	27	8	10	1	3	3	1	0	0	0	3	21	21	40	61	39	31	24	24	19	9	11	8	6	6	4	2	0	0	0
A0A0H3N967	A0A0H3N967	21	21	21	tr|A0A0H3N967|A0A0H3N967_SALTS 4-hydroxythreonine-4-phosphate dehydrogenase OS=Salmonella typhimurium (strain SL1344) OX=216597 GN=pdxAb PE=3 SV=1	1	21	21	21	17	16	13	12	12	9	7	5	4	1	3	0	0	0	0	0	0	0	0	0	1	7	11	12	15	9	8	8	6	4	3	2	2	1	1	1	1	1	1	0
A0A0H3N968	A0A0H3N968	26	26	26	tr|A0A0H3N968|A0A0H3N968_SALTS Cysteine--tRNA ligase OS=Salmonella typhimurium (strain SL1344) OX=216597 GN=cysS PE=3 SV=1	1	26	26	26	21	21	19	16	13	8	8	6	4	1	2	0	1	0	0	0	0	0	0	0	0	4	6	6	18	5	5	3	3	2	1	0	0	0	0	0	0	0	0	0
A0A0H3N972	A0A0H3N972	11	11	11	tr|A0A0H3N972|A0A0H3N972_SALTS Bifunctional protein FolD OS=Salmonella typhimurium (strain SL1344) OX=216597 GN=folD PE=3 SV=1	1	11	11	11	6	7	6	6	5	3	3	2	1	0	0	0	0	0	0	0	0	0	0	0	0	4	4	4	7	5	5	4	2	0	0	0	0	0	0	0	0	0	0	0
A0A0H3N973	A0A0H3N973	6	6	6	tr|A0A0H3N973|A0A0H3N973_SALTS Possible multicopper oxidase OS=Salmonella typhimurium (strain SL1344) OX=216597 GN=cueO PE=4 SV=1	1	6	6	6	4	4	3	2	3	3	2	1	1	0	0	0	0	0	0	0	0	0	0	0	0	1	2	1	4	1	2	1	0	0	0	0	0	0	0	0	0	0	0	0
A0A0H3N983	A0A0H3N983	23	23	23	tr|A0A0H3N983|A0A0H3N983_SALTS Galactokinase OS=Salmonella typhimurium (strain SL1344) OX=216597 GN=galK PE=3 SV=1	1	23	23	23	20	20	18	14	11	10	11	8	3	2	1	0	0	0	0	0	0	0	1	0	0	4	7	8	17	7	8	7	7	4	5	7	3	3	1	1	2	0	0	0
A0A0H3N986	A0A0H3N986	7	7	7	tr|A0A0H3N986|A0A0H3N986_SALTS Probable pyridine nucleotide-disulfide oxidoreductase OS=Salmonella typhimurium (strain SL1344) OX=216597 GN=ykgC PE=3 SV=1	1	7	7	7	0	2	4	2	2	0	0	0	0	0	0	0	0	0	0	0	0	0	0	0	0	1	0	0	1	0	0	0	0	0	0	0	0	0	0	0	0	0	0	0
A0A0H3N988	A0A0H3N988	10	10	10	tr|A0A0H3N988|A0A0H3N988_SALTS Hypothetical molybdenum transport protein ModE OS=Salmonella typhimurium (strain SL1344) OX=216597 GN=modE PE=4 SV=1	1	10	10	10	7	8	7	7	6	6	3	0	0	0	0	0	0	0	0	0	0	0	0	0	0	1	3	3	6	0	0	0	0	0	0	0	0	0	0	0	0	0	0	0
A0A0H3N989	A0A0H3N989	5	5	5	tr|A0A0H3N989|A0A0H3N989_SALTS 2-amino-4-hydroxy-6-hydroxymethyldihydropteridine pyrophosphokinase OS=Salmonella typhimurium (strain SL1344) OX=216597 GN=folK PE=4 SV=1	1	5	5	5	4	4	3	0	0	0	1	0	0	0	0	0	0	0	0	0	0	0	0	0	0	2	1	1	2	1	1	0	0	0	0	0	0	0	0	0	0	0	0	0
A0A0H3N990	A0A0H3N990	4	4	4	tr|A0A0H3N990|A0A0H3N990_SALTS Hypothetical membrane protein OS=Salmonella typhimurium (strain SL1344) OX=216597 GN=ybdG PE=4 SV=1	1	4	4	4	0	0	0	0	0	0	0	0	0	0	0	0	0	0	0	0	0	0	0	0	3	0	0	0	0	0	0	0	0	0	0	0	0	0	0	0	0	0	0	0
A0A0H3N993	A0A0H3N993	12	12	12	tr|A0A0H3N993|A0A0H3N993_SALTS Uncharacterized protein OS=Salmonella typhimurium (strain SL1344) OX=216597 GN=ybhA PE=4 SV=1	1	12	12	12	11	8	7	5	2	4	6	6	6	2	2	1	2	0	0	0	0	1	0	0	1	2	5	5	3	3	3	2	2	2	2	2	2	1	1	1	1	1	1	0
A0A0H3N994	A0A0H3N994	2	2	2	tr|A0A0H3N994|A0A0H3N994_SALTS RNA 2,3-cyclic phosphodiesterase OS=Salmonella typhimurium (strain SL1344) OX=216597 GN=ligT PE=3 SV=1	1	2	2	2	1	1	0	0	0	0	0	0	0	0	0	0	0	0	0	0	0	0	0	0	0	0	1	0	0	0	0	0	0	0	0	0	0	0	0	0	0	0	0	0
A0A0H3N9A0	A0A0H3N9A0	4	4	4	tr|A0A0H3N9A0|A0A0H3N9A0_SALTS Histidine utilization repressor OS=Salmonella typhimurium (strain SL1344) OX=216597 GN=hutC PE=4 SV=1	1	4	4	4	3	3	1	1	0	0	0	0	0	0	0	0	0	0	0	0	0	0	0	0	0	1	0	0	2	0	0	0	0	0	0	0	0	0	0	0	0	0	0	0
A0A0H3N9A8	A0A0H3N9A8	4	4	4	tr|A0A0H3N9A8|A0A0H3N9A8_SALTS Iron-sulfur cluster insertion protein ErpA OS=Salmonella typhimurium (strain SL1344) OX=216597 GN=yadR PE=3 SV=1	1	4	4	4	4	2	4	4	2	3	3	3	3	2	2	1	2	0	1	1	1	1	0	0	1	0	2	2	4	1	0	0	2	0	0	0	0	0	0	0	0	0	0	0
A0A0H3N9B0	A0A0H3N9B0	28	28	28	tr|A0A0H3N9B0|A0A0H3N9B0_SALTS Type III secretion system effector protein, leucine rich repeat-Acts as a ubiquitin ligase for thioredoxin. Also targets the ERdj3 chaperone of mammalian cells OS=Salmonella typhimurium (strain SL1344) OX=216597 GN=slrP PE=4	1	28	28	28	13	24	22	11	14	7	6	2	2	0	0	0	0	0	0	0	0	0	0	0	1	0	1	1	18	1	0	0	0	0	0	0	0	0	0	0	0	0	0	1
A0A0H3N9B4	A0A0H3N9B4	29	29	29	tr|A0A0H3N9B4|A0A0H3N9B4_SALTS Periplasmic serine endoprotease DegP-like OS=Salmonella typhimurium (strain SL1344) OX=216597 GN=htrA PE=3 SV=1	1	29	29	29	17	17	21	23	26	25	21	19	14	12	10	4	3	2	3	1	2	1	0	0	7	6	6	7	19	12	14	14	13	10	5	4	2	0	1	1	0	0	0	0
A0A0H3N9B5	A0A0H3N9B5	7	7	7	tr|A0A0H3N9B5|A0A0H3N9B5_SALTS Ferrienterobactin-binding periplasmic protein OS=Salmonella typhimurium (strain SL1344) OX=216597 GN=fepB PE=4 SV=1	1	7	7	7	5	4	2	1	1	0	1	0	0	0	0	0	0	0	0	0	0	0	0	0	0	0	3	2	1	0	0	0	0	0	0	0	0	0	0	0	0	0	0	0
A0A0H3N9B6	A0A0H3N9B6	5	5	5	tr|A0A0H3N9B6|A0A0H3N9B6_SALTS Molybdopterin synthase sulfur carrier subunit OS=Salmonella typhimurium (strain SL1344) OX=216597 GN=moaD PE=3 SV=1	1	5	5	5	5	5	4	3	1	1	1	1	1	0	0	0	0	0	0	0	0	0	0	0	0	1	2	2	3	2	0	0	0	0	0	0	0	0	0	0	0	0	0	0
A0A0H3N9C1	A0A0H3N9C1	14	14	14	tr|A0A0H3N9C1|A0A0H3N9C1_SALTS Bifunctional uridylyltransferase/uridylyl-removing enzyme OS=Salmonella typhimurium (strain SL1344) OX=216597 GN=glnD PE=3 SV=1	1	14	14	14	1	7	7	4	3	1	1	1	1	1	0	0	0	0	0	1	1	0	0	0	0	1	0	1	6	3	2	0	0	0	0	0	0	0	0	0	0	0	0	0
A0A0H3N9C2	A0A0H3N9C2	3	3	3	tr|A0A0H3N9C2|A0A0H3N9C2_SALTS Uncharacterized protein OS=Salmonella typhimurium (strain SL1344) OX=216597 GN=ybdM PE=4 SV=1	1	3	3	3	0	0	0	0	0	0	0	1	1	1	0	0	0	0	0	0	0	0	0	0	0	0	0	1	1	1	1	1	1	1	1	1	1	1	1	0	0	0	0	0
A0A0H3N9C5	A0A0H3N9C5	17	17	17	tr|A0A0H3N9C5|A0A0H3N9C5_SALTS Ribosome-recycling factor OS=Salmonella typhimurium (strain SL1344) OX=216597 GN=frr PE=3 SV=1	1	17	17	17	17	15	13	12	10	10	8	8	8	6	5	2	3	1	1	0	0	0	0	0	0	3	5	7	13	5	3	3	3	3	3	3	3	3	2	1	2	1	0	0
A0A0H3N9C6	A0A0H3N9C6	28	28	28	tr|A0A0H3N9C6|A0A0H3N9C6_SALTS Alkyl hydroperoxide reductase F52A protein (Subunit F) OS=Salmonella typhimurium (strain SL1344) OX=216597 GN=ahpF PE=3 SV=1	1	28	28	28	18	19	24	25	21	14	14	11	8	4	4	1	2	1	0	0	0	0	0	0	0	9	10	13	21	10	10	8	7	4	4	2	1	0	0	0	0	0	0	0
A0A0H3N9C8	A0A0H3N9C8	11	11	11	tr|A0A0H3N9C8|A0A0H3N9C8_SALTS ATP-dependent RNA helicase RhlE OS=Salmonella typhimurium (strain SL1344) OX=216597 GN=rhlE PE=3 SV=1	1	11	11	11	0	0	0	0	1	1	1	1	1	2	1	1	1	0	2	2	2	4	3	1	3	0	0	0	0	1	1	1	1	1	1	1	1	1	0	0	0	0	0	0
A0A0H3N9C9	A0A0H3N9C9	12	12	12	tr|A0A0H3N9C9|A0A0H3N9C9_SALTS Uncharacterized protein OS=Salmonella typhimurium (strain SL1344) OX=216597 GN=ybdQ PE=4 SV=1	1	12	12	12	10	10	8	8	6	6	5	4	4	4	3	2	3	0	1	0	1	2	1	1	4	4	9	8	9	7	5	7	5	3	2	2	3	1	1	0	1	1	1	1
A0A0H3N9D1	A0A0H3N9D1	23	23	23	tr|A0A0H3N9D1|A0A0H3N9D1_SALTS Outer membrane protein assembly factor BamA OS=Salmonella typhimurium (strain SL1344) OX=216597 GN=yaeT PE=3 SV=1	1	23	23	23	10	6	6	3	2	3	5	3	2	3	3	1	2	1	0	0	0	1	0	1	12	1	3	1	3	0	0	0	0	0	0	0	0	0	1	1	1	0	1	2
A0A0H3N9D5	A0A0H3N9D5	9	9	9	tr|A0A0H3N9D5|A0A0H3N9D5_SALTS Lipid-A-disaccharide synthase OS=Salmonella typhimurium (strain SL1344) OX=216597 GN=lpxB PE=3 SV=1	1	9	9	9	0	0	0	1	2	2	3	5	6	6	6	4	5	4	3	2	1	2	0	1	4	2	0	0	0	0	0	1	1	1	2	2	2	3	2	1	1	1	1	1
A0A0H3N9D6	A0A0H3N9D6	21	21	21	tr|A0A0H3N9D6|A0A0H3N9D6_SALTS DNA protection during starvation protein OS=Salmonella typhimurium (strain SL1344) OX=216597 GN=dps PE=3 SV=1	1	21	21	21	9	8	7	15	19	20	21	17	17	18	13	7	7	4	1	0	0	0	0	0	1	3	4	3	8	6	8	8	8	7	7	6	5	4	1	1	0	0	0	1
A0A0H3N9D9	A0A0H3N9D9	18	18	18	tr|A0A0H3N9D9|A0A0H3N9D9_SALTS Lysine decarboxylase OS=Salmonella typhimurium (strain SL1344) OX=216597 GN=ldcC PE=4 SV=1	1	18	18	18	0	0	0	0	0	2	14	13	11	9	4	0	0	0	0	0	0	0	0	0	0	1	0	0	0	0	0	1	5	4	1	0	0	0	0	0	0	0	0	0
A0A0H3N9E1	A0A0H3N9E1	14	14	13	tr|A0A0H3N9E1|A0A0H3N9E1_SALTS Hypothetical exported protein OS=Salmonella typhimurium (strain SL1344) OX=216597 GN=ybiS PE=4 SV=1	1	14	14	13	13	13	12	10	7	6	6	3	4	2	2	1	1	0	0	0	0	1	0	0	0	3	5	5	11	4	3	1	1	0	0	0	0	0	0	0	0	0	0	0
A0A0H3N9E2	A0A0H3N9E2	6	6	6	tr|A0A0H3N9E2|A0A0H3N9E2_SALTS Cold shock-like protein cspE OS=Salmonella typhimurium (strain SL1344) OX=216597 GN=cspE PE=4 SV=1	1	6	6	6	6	6	6	5	5	5	5	5	5	5	5	2	5	1	2	1	1	1	0	0	0	4	4	4	5	3	3	3	3	2	2	2	2	2	2	2	2	0	0	0
A0A0H3N9E5;A0A0H3NJC6	A0A0H3N9E5	9;1	9;1	9;1	tr|A0A0H3N9E5|A0A0H3N9E5_SALTS Uncharacterized protein OS=Salmonella typhimurium (strain SL1344) OX=216597 GN=ybiV(1) PE=4 SV=1	2	9	9	9	7	4	7	2	2	0	0	0	0	0	0	0	0	0	0	0	0	0	0	0	0	0	3	5	7	0	0	0	0	0	0	0	0	0	0	0	0	0	0	0
A0A0H3N9E6	A0A0H3N9E6	7	7	7	tr|A0A0H3N9E6|A0A0H3N9E6_SALTS Uncharacterized protein OS=Salmonella typhimurium (strain SL1344) OX=216597 GN=yaeQ PE=4 SV=1	1	7	7	7	5	6	4	0	0	0	0	0	0	0	0	0	0	0	0	0	0	0	0	0	0	1	3	3	2	1	1	0	0	0	0	0	0	0	0	0	0	0	0	0
A0A0H3N9F1	A0A0H3N9F1	7	7	7	tr|A0A0H3N9F1|A0A0H3N9F1_SALTS Outer membrane lipoprotein RcsF OS=Salmonella typhimurium (strain SL1344) OX=216597 GN=rcsF PE=3 SV=1	1	7	7	7	0	0	0	0	0	0	0	0	2	1	2	0	1	1	1	2	0	0	0	0	2	0	0	0	0	0	0	0	0	0	0	0	0	0	1	1	0	0	0	0
A0A0H3N9F2	A0A0H3N9F2	8	8	8	tr|A0A0H3N9F2|A0A0H3N9F2_SALTS Hypothetical L-asparaginase OS=Salmonella typhimurium (strain SL1344) OX=216597 GN=ybiK PE=4 SV=1	1	8	8	8	7	7	7	1	1	0	0	0	0	0	0	0	0	0	0	0	0	0	0	0	0	1	2	2	7	0	0	0	0	0	0	0	0	0	0	0	0	0	0	0
A0A0H3N9F6	A0A0H3N9F6	17	17	17	tr|A0A0H3N9F6|A0A0H3N9F6_SALTS Hypothetical oxidoreductase OS=Salmonella typhimurium (strain SL1344) OX=216597 GN=dkgB PE=4 SV=1	1	17	17	17	14	12	12	9	3	1	2	0	0	0	0	0	0	0	0	0	0	0	0	0	0	2	6	6	9	2	2	3	2	0	0	0	0	0	0	0	0	0	0	0
A0A0H3N9F7	A0A0H3N9F7	5	5	5	tr|A0A0H3N9F7|A0A0H3N9F7_SALTS Hypothetical aminotransferase CobD OS=Salmonella typhimurium (strain SL1344) OX=216597 GN=cobD PE=4 SV=1	1	5	5	5	1	4	2	1	0	0	0	0	0	0	0	0	0	0	0	0	0	0	0	0	0	0	0	0	1	0	0	0	0	0	0	0	0	0	0	0	0	0	0	0
A0A0H3N9F8	A0A0H3N9F8	24	24	24	tr|A0A0H3N9F8|A0A0H3N9F8_SALTS Ribosomal protein S12 methylthiotransferase RimO OS=Salmonella typhimurium (strain SL1344) OX=216597 GN=rimO PE=3 SV=1	1	24	24	24	20	21	17	15	14	8	7	2	2	1	1	0	0	0	0	0	0	0	0	0	0	4	9	7	15	7	5	3	3	1	0	0	0	0	0	0	0	0	0	0
A0A0H3N9G9	A0A0H3N9G9	15	15	15	tr|A0A0H3N9G9|A0A0H3N9G9_SALTS Glutathione s-transferase family protein OS=Salmonella typhimurium (strain SL1344) OX=216597 GN=yliJ PE=4 SV=1	1	15	15	15	12	12	12	6	6	3	3	2	1	0	0	0	0	0	0	0	0	0	0	0	0	2	4	6	10	4	2	1	0	0	0	0	0	0	0	0	0	0	0	0
A0A0H3N9H5	A0A0H3N9H5	5	5	5	tr|A0A0H3N9H5|A0A0H3N9H5_SALTS Uncharacterized protein OS=Salmonella typhimurium (strain SL1344) OX=216597 GN=SL1344_0843 PE=4 SV=1	1	5	5	5	5	4	3	2	1	0	0	0	0	0	0	0	0	0	0	0	0	0	0	0	0	2	3	3	3	1	0	0	0	0	0	0	0	0	0	0	0	0	0	0
A0A0H3N9H9	A0A0H3N9H9	21	21	21	tr|A0A0H3N9H9|A0A0H3N9H9_SALTS ABC transporter periplasmic binding protein (Glutamate/aspartate) OS=Salmonella typhimurium (strain SL1344) OX=216597 GN=gltI PE=4 SV=1	1	21	21	21	20	21	17	16	15	13	14	12	11	9	7	4	6	4	2	1	0	0	0	0	0	4	9	9	18	7	5	5	5	4	4	4	3	3	3	3	3	0	0	0
A0A0H3N9I0	A0A0H3N9I0	9	9	9	tr|A0A0H3N9I0|A0A0H3N9I0_SALTS Glutaredoxin 1 OS=Salmonella typhimurium (strain SL1344) OX=216597 GN=grxA PE=4 SV=1	1	9	9	9	8	7	5	4	5	5	5	3	2	2	3	1	2	1	1	1	0	0	0	0	0	2	3	3	6	3	3	2	3	2	1	1	0	0	0	0	0	0	0	0
A0A0H3N9I3	A0A0H3N9I3	36	36	36	tr|A0A0H3N9I3|A0A0H3N9I3_SALTS tRNA-2-methylthio-N(6)-dimethylallyladenosine synthase OS=Salmonella typhimurium (strain SL1344) OX=216597 GN=miaB PE=3 SV=1	1	36	36	36	30	33	26	19	16	7	7	4	4	1	1	0	0	0	0	0	0	0	0	0	1	5	10	10	25	8	7	6	6	3	0	0	0	0	0	0	0	0	0	0
A0A0H3N9I6	A0A0H3N9I6	17	17	17	tr|A0A0H3N9I6|A0A0H3N9I6_SALTS N-acetylglucosamine repressor OS=Salmonella typhimurium (strain SL1344) OX=216597 GN=nagC PE=4 SV=1	1	17	17	17	14	12	10	7	3	2	3	1	1	1	1	0	0	0	0	0	0	0	0	0	0	1	2	1	5	1	1	1	1	1	0	0	0	0	0	0	0	0	0	0
A0A0H3N9J8	A0A0H3N9J8	14	14	14	tr|A0A0H3N9J8|A0A0H3N9J8_SALTS Negative modulator of initiation of replication OS=Salmonella typhimurium (strain SL1344) OX=216597 GN=seqA PE=3 SV=1	1	14	14	14	9	9	8	10	10	11	11	12	11	8	7	6	7	5	8	3	2	1	0	0	1	2	3	3	9	5	4	4	4	3	3	3	3	3	3	3	3	1	2	0
A0A0H3N9J9	A0A0H3N9J9	4	4	4	tr|A0A0H3N9J9|A0A0H3N9J9_SALTS Hybrid-cluster protein oxidoreductase-FAD and [2FE-2S] cofactors, NADH as electron donor OS=Salmonella typhimurium (strain SL1344) OX=216597 GN=hcr PE=4 SV=1	1	4	4	4	2	1	1	0	0	0	0	0	0	0	0	0	0	0	0	0	0	0	0	0	0	0	1	1	0	0	0	0	0	0	0	0	0	0	0	0	0	0	0	0
A0A0H3N9K3	A0A0H3N9K3	4	4	4	tr|A0A0H3N9K3|A0A0H3N9K3_SALTS KDP operon transcriptional regulatory protein OS=Salmonella typhimurium (strain SL1344) OX=216597 GN=kdpE PE=4 SV=1	1	4	4	4	2	1	0	0	0	0	0	0	0	0	0	0	0	0	0	0	0	0	0	0	0	0	0	0	0	1	1	1	1	1	1	0	0	0	0	0	0	0	0	0
A0A0H3N9K4	A0A0H3N9K4	5	5	5	tr|A0A0H3N9K4|A0A0H3N9K4_SALTS Hypothetical exported protein OS=Salmonella typhimurium (strain SL1344) OX=216597 GN=ybjY PE=3 SV=1	1	5	5	5	0	0	0	0	0	0	0	0	0	0	0	0	0	0	0	0	0	0	0	0	2	0	0	0	0	0	0	0	0	0	0	0	0	0	0	0	0	0	0	0
A0A0H3N9K7	A0A0H3N9K7	18	18	18	tr|A0A0H3N9K7|A0A0H3N9K7_SALTS Phosphoheptose isomerase OS=Salmonella typhimurium (strain SL1344) OX=216597 GN=gmhA PE=3 SV=1	1	18	18	18	12	14	13	14	12	12	10	9	5	2	1	0	0	0	0	0	0	0	0	0	0	6	6	6	14	9	10	8	8	3	2	1	0	0	0	0	0	0	0	0
A0A0H3N9L2	A0A0H3N9L2	11	11	11	tr|A0A0H3N9L2|A0A0H3N9L2_SALTS Uncharacterized protein OS=Salmonella typhimurium (strain SL1344) OX=216597 GN=ybgK PE=4 SV=1	1	11	11	11	10	10	8	4	2	4	3	2	0	0	0	0	0	0	0	0	0	0	0	0	0	0	0	0	6	0	0	0	0	0	0	0	0	0	0	0	0	0	0	0
A0A0H3N9L3	A0A0H3N9L3	23	23	23	tr|A0A0H3N9L3|A0A0H3N9L3_SALTS Aminoacyl-histidine dipeptidase OS=Salmonella typhimurium (strain SL1344) OX=216597 GN=pepD PE=4 SV=1	1	23	23	23	15	18	18	20	21	19	18	15	10	11	9	6	7	3	2	1	1	0	0	0	1	10	10	14	19	15	13	11	10	8	7	6	6	5	4	3	3	0	0	0
A0A0H3N9L5	A0A0H3N9L5	5	5	5	tr|A0A0H3N9L5|A0A0H3N9L5_SALTS Translation initiation factor IF-1 OS=Salmonella typhimurium (strain SL1344) OX=216597 GN=infA PE=3 SV=1	1	5	5	5	5	4	3	3	3	3	2	2	2	1	1	0	0	0	0	0	0	0	0	0	0	3	4	4	4	3	3	3	3	3	1	1	0	0	0	0	0	0	0	0
A0A0H3N9L9	A0A0H3N9L9	21	21	21	tr|A0A0H3N9L9|A0A0H3N9L9_SALTS Glutamate 5-kinase OS=Salmonella typhimurium (strain SL1344) OX=216597 GN=proB PE=3 SV=1	1	21	21	21	0	8	18	18	18	12	12	10	6	2	1	0	0	0	0	0	0	0	0	0	0	3	0	4	19	5	3	4	1	1	1	0	0	0	0	0	0	0	0	0
A0A0H3N9M1	A0A0H3N9M1	17	17	17	tr|A0A0H3N9M1|A0A0H3N9M1_SALTS Thioredoxin reductase OS=Salmonella typhimurium (strain SL1344) OX=216597 GN=trxB PE=3 SV=1	1	17	17	17	15	15	15	15	15	14	14	13	8	8	8	1	4	0	0	1	0	0	0	0	0	7	10	13	15	11	10	9	9	8	8	7	3	1	1	1	1	0	0	0
A0A0H3N9M5	A0A0H3N9M5	35	35	35	tr|A0A0H3N9M5|A0A0H3N9M5_SALTS Serine--tRNA ligase OS=Salmonella typhimurium (strain SL1344) OX=216597 GN=serS PE=3 SV=1	1	35	35	35	20	28	25	26	25	19	19	15	10	8	6	2	1	1	1	1	1	0	0	0	1	8	10	17	27	17	12	14	8	5	2	1	1	1	0	0	0	0	0	0
A0A0H3N9M7	A0A0H3N9M7	33	33	33	tr|A0A0H3N9M7|A0A0H3N9M7_SALTS Citrate synthase OS=Salmonella typhimurium (strain SL1344) OX=216597 GN=gltA PE=3 SV=1	1	33	33	33	0	7	19	27	28	24	22	19	21	17	15	4	11	3	4	3	3	2	1	0	1	9	1	3	19	17	19	16	17	13	9	8	7	5	4	4	1	1	1	2
A0A0H3N9N1	A0A0H3N9N1	24	24	24	tr|A0A0H3N9N1|A0A0H3N9N1_SALTS Succinate dehydrogenase iron-sulfur subunit OS=Salmonella typhimurium (strain SL1344) OX=216597 GN=sdhB PE=3 SV=1	1	24	24	24	10	14	14	14	13	12	11	11	8	6	5	1	0	1	1	1	2	3	2	1	20	2	0	4	17	3	3	2	1	0	0	0	0	0	0	0	0	0	1	3
A0A0H3N9N5	A0A0H3N9N5	18	18	18	tr|A0A0H3N9N5|A0A0H3N9N5_SALTS Cytochrome d ubiquinol oxidase subunit I OS=Salmonella typhimurium (strain SL1344) OX=216597 GN=cydA PE=4 SV=1	1	18	18	18	0	0	0	0	0	0	4	4	4	5	4	1	4	4	7	6	7	6	4	1	15	2	0	0	0	0	0	0	0	0	0	0	0	0	0	0	0	0	1	7
A0A0H3N9P1	A0A0H3N9P1	4	4	4	tr|A0A0H3N9P1|A0A0H3N9P1_SALTS Tol-Pal system protein TolQ OS=Salmonella typhimurium (strain SL1344) OX=216597 GN=tolQ PE=3 SV=1	1	4	4	4	0	0	0	0	0	0	0	0	0	0	0	0	0	1	2	1	0	1	0	0	2	0	0	0	0	0	0	0	0	0	0	0	0	0	0	0	0	0	0	0
A0A0H3N9P3	A0A0H3N9P3	12	12	12	tr|A0A0H3N9P3|A0A0H3N9P3_SALTS Cell division coordinator CpoB OS=Salmonella typhimurium (strain SL1344) OX=216597 GN=ybgF PE=3 SV=1	1	12	12	12	11	10	8	7	5	4	4	2	2	3	3	1	1	1	0	0	0	0	0	0	0	2	3	4	9	2	1	1	1	0	0	0	0	0	0	0	0	0	0	0
A0A0H3N9P8	A0A0H3N9P8	17	17	16	tr|A0A0H3N9P8|A0A0H3N9P8_SALTS Phospho-2-dehydro-3-deoxyheptonate aldolase OS=Salmonella typhimurium (strain SL1344) OX=216597 GN=aroG PE=3 SV=1	1	17	17	16	4	11	13	14	13	11	10	8	5	3	2	2	1	0	0	0	0	0	0	0	0	3	1	4	14	10	5	6	6	2	1	0	0	0	0	0	0	0	0	0
A0A0H3N9R0	A0A0H3N9R0	23	23	23	tr|A0A0H3N9R0|A0A0H3N9R0_SALTS UDP-glucose 4-epimerase OS=Salmonella typhimurium (strain SL1344) OX=216597 GN=galE PE=4 SV=1	1	23	23	23	15	16	17	16	14	12	11	11	8	5	5	2	0	0	0	0	0	0	0	0	0	3	6	7	16	7	6	6	3	3	1	1	1	2	0	0	0	0	0	0
A0A0H3N9R4	A0A0H3N9R4	23	23	23	tr|A0A0H3N9R4|A0A0H3N9R4_SALTS Molybdate-binding periplasmic protein OS=Salmonella typhimurium (strain SL1344) OX=216597 GN=modA PE=4 SV=1	1	23	23	23	23	21	15	11	9	11	10	7	5	4	4	1	2	0	0	0	0	0	0	0	0	7	12	10	16	8	6	4	4	4	3	3	0	2	2	1	1	0	0	0
A0A0H3N9R9	A0A0H3N9R9	3	3	3	tr|A0A0H3N9R9|A0A0H3N9R9_SALTS Possible pectinesterase OS=Salmonella typhimurium (strain SL1344) OX=216597 GN=ybhC PE=4 SV=1	1	3	3	3	0	1	0	0	0	0	2	1	1	1	0	0	1	0	0	0	0	0	0	0	2	0	0	0	0	0	0	0	0	0	0	0	0	0	0	0	0	0	0	0
A0A0H3N9S2	A0A0H3N9S2	12	12	12	tr|A0A0H3N9S2|A0A0H3N9S2_SALTS PrpD protein OS=Salmonella typhimurium (strain SL1344) OX=216597 GN=prpD PE=4 SV=1	1	12	12	12	0	0	1	5	8	5	7	3	0	0	0	1	1	1	0	0	0	0	0	0	0	0	0	0	0	2	4	2	1	1	0	0	0	0	0	0	0	0	0	0
A0A0H3N9S4	A0A0H3N9S4	26	26	26	tr|A0A0H3N9S4|A0A0H3N9S4_SALTS Histidine ammonia-lyase OS=Salmonella typhimurium (strain SL1344) OX=216597 GN=hutH PE=3 SV=1	1	26	26	26	0	0	11	21	22	12	10	6	2	1	0	0	0	0	0	0	0	0	0	0	0	1	0	1	11	5	7	3	2	1	0	0	0	0	0	0	0	0	0	0
A0A0H3N9S6	A0A0H3N9S6	11	11	11	tr|A0A0H3N9S6|A0A0H3N9S6_SALTS Lipid A export ATP-binding/permease protein MsbA OS=Salmonella typhimurium (strain SL1344) OX=216597 GN=msbA PE=3 SV=1	1	11	11	11	1	0	0	0	0	0	0	0	0	0	0	0	0	0	0	0	1	0	0	0	9	0	0	0	0	0	0	0	0	0	0	0	0	0	0	0	0	0	0	0
A0A0H3N9S9	A0A0H3N9S9	4	4	4	tr|A0A0H3N9S9|A0A0H3N9S9_SALTS Penicillin-binding protein AmpH OS=Salmonella typhimurium (strain SL1344) OX=216597 GN=ampH PE=4 SV=1	1	4	4	4	2	3	2	1	0	0	0	0	0	0	0	0	0	0	0	0	0	0	0	0	0	0	1	1	2	0	0	0	0	0	0	0	0	0	0	0	0	0	0	0
A0A0H3N9T1	A0A0H3N9T1	6	6	6	tr|A0A0H3N9T1|A0A0H3N9T1_SALTS Uncharacterized protein OS=Salmonella typhimurium (strain SL1344) OX=216597 GN=SL1344_0926 PE=4 SV=1	1	6	6	6	1	1	1	1	1	1	4	5	4	2	0	0	0	0	0	0	0	0	0	0	0	0	0	0	0	0	0	0	0	0	0	0	0	0	0	0	0	0	0	0
A0A0H3N9T3	A0A0H3N9T3	115	115	115	tr|A0A0H3N9T3|A0A0H3N9T3_SALTS Chromosome partition protein MukB OS=Salmonella typhimurium (strain SL1344) OX=216597 GN=mukB PE=3 SV=1	1	115	115	115	2	6	49	84	98	100	93	87	75	59	44	17	23	5	6	3	3	4	1	0	16	12	1	1	37	28	33	39	40	29	27	17	14	9	7	5	3	2	3	6
A0A0H3N9T5	A0A0H3N9T5	12	12	12	tr|A0A0H3N9T5|A0A0H3N9T5_SALTS GTP 3,8-cyclase OS=Salmonella typhimurium (strain SL1344) OX=216597 GN=moaA PE=3 SV=1	1	12	12	12	0	1	1	1	1	1	7	11	10	6	2	0	0	0	0	0	0	0	0	0	0	0	0	0	1	0	0	0	2	2	2	1	0	0	0	0	0	0	0	0
A0A0H3N9T7	A0A0H3N9T7	20	20	20	tr|A0A0H3N9T7|A0A0H3N9T7_SALTS D-alanine--D-alanine ligase OS=Salmonella typhimurium (strain SL1344) OX=216597 GN=ddlA PE=3 SV=1	1	20	20	20	14	18	17	15	14	13	7	5	2	1	0	0	0	0	0	0	0	0	0	0	0	5	7	8	17	9	8	5	2	1	1	0	0	0	0	0	0	0	0	0
A0A0H3N9T8	A0A0H3N9T8	10	8	8	tr|A0A0H3N9T8|A0A0H3N9T8_SALTS Outer membrane protein F OS=Salmonella typhimurium (strain SL1344) OX=216597 GN=ompF PE=3 SV=1	1	10	8	8	0	0	1	0	1	1	3	3	3	3	4	1	4	1	2	1	1	4	3	0	9	0	0	0	0	0	0	0	0	0	0	0	0	1	1	1	0	1	1	4
A0A0H3N9U1	A0A0H3N9U1	2	2	2	tr|A0A0H3N9U1|A0A0H3N9U1_SALTS Hypothetical membrane protein OS=Salmonella typhimurium (strain SL1344) OX=216597 GN=ybhL PE=3 SV=1	1	2	2	2	1	0	0	0	0	0	0	0	0	0	0	0	0	0	0	0	0	0	0	0	1	0	0	0	0	0	0	0	0	0	0	0	0	0	0	0	0	0	0	0
A0A0H3N9U2	A0A0H3N9U2	12	12	12	tr|A0A0H3N9U2|A0A0H3N9U2_SALTS Nicotinate phosphoribosyltransferase OS=Salmonella typhimurium (strain SL1344) OX=216597 GN=pncB PE=3 SV=1	1	12	12	12	7	9	7	1	1	0	0	0	0	0	0	0	0	0	0	0	0	0	0	0	0	3	2	2	6	1	0	0	0	0	0	0	0	0	0	0	0	0	0	0
A0A0H3N9U5	A0A0H3N9U5	2	2	2	tr|A0A0H3N9U5|A0A0H3N9U5_SALTS Cardiolipin synthase B OS=Salmonella typhimurium (strain SL1344) OX=216597 GN=ybhO PE=3 SV=1	1	2	2	2	0	0	0	0	2	2	2	2	2	0	0	0	0	0	0	0	0	0	0	0	0	0	0	0	0	0	0	0	0	0	0	0	0	0	0	0	0	0	0	0
A0A0H3N9V0	A0A0H3N9V0	2	2	2	tr|A0A0H3N9V0|A0A0H3N9V0_SALTS Hypothetical ABC transporter ATP-binding protein OS=Salmonella typhimurium (strain SL1344) OX=216597 GN=ybhF PE=4 SV=1	1	2	2	2	0	0	0	0	0	0	1	0	0	0	0	0	0	0	0	0	0	0	0	0	1	0	0	0	0	0	0	0	0	0	0	0	0	0	0	0	0	0	0	0
A0A0H3NEI5;A0A0H3N9V5	A0A0H3NEI5;A0A0H3N9V5	4;4	4;4	4;4	tr|A0A0H3NEI5|A0A0H3NEI5_SALTS Hypothetical damage-inducible protein OS=Salmonella typhimurium (strain SL1344) OX=216597 GN=SL1344_2584 PE=4 SV=1;tr|A0A0H3N9V5|A0A0H3N9V5_SALTS DNA Damage Inducible Protein OS=Salmonella typhimurium (strain SL1344) OX=21659	2	4	4	4	3	1	0	0	0	0	0	0	0	0	0	0	0	0	0	0	0	0	0	0	0	0	0	0	0	0	0	0	0	0	0	0	0	0	0	0	0	0	0	0
A0A0H3N9V6	A0A0H3N9V6	12	12	12	tr|A0A0H3N9V6|A0A0H3N9V6_SALTS Hypothetical glycosyltransferase OS=Salmonella typhimurium (strain SL1344) OX=216597 GN=ybiB PE=4 SV=1	1	12	12	12	10	12	11	8	7	4	5	3	2	1	1	0	0	0	0	0	0	0	0	0	0	1	1	2	8	1	0	0	0	0	0	0	0	0	0	0	0	0	0	0
A0A0H3N9V9	A0A0H3N9V9	13	13	13	tr|A0A0H3N9V9|A0A0H3N9V9_SALTS Nuclease SbcCD subunit C OS=Salmonella typhimurium (strain SL1344) OX=216597 GN=sbcC PE=3 SV=1	1	13	13	13	1	6	6	2	6	3	5	0	0	0	0	1	0	0	0	0	0	0	0	0	1	0	0	0	3	0	0	0	0	0	0	0	0	0	0	0	0	0	0	0
A0A0H3N9W0	A0A0H3N9W0	7	7	7	tr|A0A0H3N9W0|A0A0H3N9W0_SALTS Glutamine transport ATP-binding protein GlnQ OS=Salmonella typhimurium (strain SL1344) OX=216597 GN=glnQ PE=4 SV=1	1	7	7	7	1	1	0	0	1	0	1	1	1	1	0	0	0	0	0	0	0	0	0	0	5	1	1	1	0	0	0	0	0	0	0	0	0	0	0	0	0	0	0	0
A0A0H3N9W2	A0A0H3N9W2	3	3	3	tr|A0A0H3N9W2|A0A0H3N9W2_SALTS Putative Probacteriophage Protein OS=Salmonella typhimurium (strain SL1344) OX=216597 GN=SL1344_0962 PE=4 SV=1	1	3	3	3	3	2	1	0	0	0	0	0	0	0	0	0	0	0	0	0	0	0	0	0	0	0	3	1	1	1	1	0	1	0	0	0	0	0	0	0	0	0	0	0
A0A0H3N9W8	A0A0H3N9W8	5	5	5	tr|A0A0H3N9W8|A0A0H3N9W8_SALTS ATP-dependent Clp protease proteolytic subunit OS=Salmonella typhimurium (strain SL1344) OX=216597 GN=SL1344_0972 PE=3 SV=1	1	5	5	5	1	0	0	0	0	0	0	0	0	0	0	0	0	0	0	0	0	0	0	0	2	0	0	0	0	0	0	0	0	1	1	0	0	0	0	0	0	0	0	0
A0A0H3N9X5	A0A0H3N9X5	20	20	20	tr|A0A0H3N9X5|A0A0H3N9X5_SALTS Hypothetical ABC transporter periplasmic binding protein OS=Salmonella typhimurium (strain SL1344) OX=216597 GN=yliB PE=4 SV=1	1	20	20	20	16	18	13	14	13	9	5	3	1	0	0	0	0	0	0	0	0	0	0	0	0	1	5	6	16	1	1	0	0	0	0	0	0	0	0	0	0	0	0	0
A0A0H3N9Y3	A0A0H3N9Y3	4	4	4	tr|A0A0H3N9Y3|A0A0H3N9Y3_SALTS Bacteriophage encoded virulence factor OS=Salmonella typhimurium (strain SL1344) OX=216597 GN=gtgE PE=4 SV=1	1	4	4	4	3	1	1	1	1	0	1	1	1	1	0	0	2	0	0	0	0	0	0	0	1	0	0	0	0	0	0	0	0	0	0	0	0	0	0	0	0	0	0	0
A0A0H3N9Y4	A0A0H3N9Y4	7	7	7	tr|A0A0H3N9Y4|A0A0H3N9Y4_SALTS Deoxyribose operon repressor OS=Salmonella typhimurium (strain SL1344) OX=216597 GN=deoR PE=4 SV=1	1	7	7	7	0	0	1	1	3	5	6	6	7	5	4	2	2	0	0	0	0	0	0	0	0	0	0	0	0	0	1	1	2	2	2	2	2	2	1	1	0	0	0	0
A0A0H3N9Y5	A0A0H3N9Y5	27	27	27	tr|A0A0H3N9Y5|A0A0H3N9Y5_SALTS Queuine tRNA-ribosyltransferase OS=Salmonella typhimurium (strain SL1344) OX=216597 GN=tgt PE=3 SV=1	1	27	27	27	8	17	19	16	17	14	10	5	2	1	1	0	0	0	0	0	0	0	0	0	0	0	1	3	19	2	2	2	2	2	1	0	0	0	0	0	0	0	0	0
A0A0H3N9Y7	A0A0H3N9Y7	12	12	12	tr|A0A0H3N9Y7|A0A0H3N9Y7_SALTS Uncharacterized protein OS=Salmonella typhimurium (strain SL1344) OX=216597 GN=SL1344_1000 PE=4 SV=1	1	12	12	12	9	7	7	6	5	5	7	3	1	0	0	0	0	0	0	0	0	0	0	0	0	1	0	0	4	0	0	0	0	0	0	0	0	0	0	0	0	0	0	0
A0A0H3N9Z3	A0A0H3N9Z3	19	19	19	tr|A0A0H3N9Z3|A0A0H3N9Z3_SALTS Riboflavin biosynthesis protein RibD OS=Salmonella typhimurium (strain SL1344) OX=216597 GN=ribD PE=3 SV=1	1	19	19	19	7	14	12	8	6	5	4	3	0	0	0	0	0	0	0	0	0	0	0	0	0	2	2	6	16	6	3	2	2	1	1	1	0	1	1	0	0	0	0	0
A0A0H3N9Z5	A0A0H3N9Z5	5	5	5	tr|A0A0H3N9Z5|A0A0H3N9Z5_SALTS Ribosomal protein S6--L-glutamate ligase OS=Salmonella typhimurium (strain SL1344) OX=216597 GN=rimK PE=3 SV=1	1	5	5	5	0	1	4	2	0	0	0	0	0	0	0	0	0	0	0	0	0	0	0	0	0	0	0	0	2	0	0	0	0	0	0	0	0	0	0	0	0	0	0	0
A0A0H3N9Z7	A0A0H3N9Z7	18	18	18	tr|A0A0H3N9Z7|A0A0H3N9Z7_SALTS Hypothetical oxidoreductase OS=Salmonella typhimurium (strain SL1344) OX=216597 GN=yajO PE=4 SV=1	1	18	18	18	13	13	7	5	3	1	4	4	5	2	2	0	3	0	0	0	0	0	0	0	0	1	2	4	9	1	1	1	1	1	1	0	0	0	0	0	0	0	0	0
A0A0H3N9Z8	A0A0H3N9Z8	24	24	24	tr|A0A0H3N9Z8|A0A0H3N9Z8_SALTS Outer membrane protein A OS=Salmonella typhimurium (strain SL1344) OX=216597 GN=ompA PE=3 SV=1	1	24	24	24	12	13	13	10	10	11	15	17	17	14	16	9	16	12	12	12	12	15	15	6	21	3	3	4	11	3	4	4	4	3	4	5	7	7	7	8	8	9	8	17
A0A0H3NA02	A0A0H3NA02	18	17	17	tr|A0A0H3NA02|A0A0H3NA02_SALTS DNA helicase OS=Salmonella typhimurium (strain SL1344) OX=216597 GN=helD PE=3 SV=1	1	18	17	17	3	9	6	10	12	6	3	0	1	0	0	0	0	0	0	0	0	0	0	0	0	1	0	2	3	1	1	1	0	0	0	0	0	0	0	0	0	0	0	0
A0A0H3NA07	A0A0H3NA07	20	20	20	tr|A0A0H3NA07|A0A0H3NA07_SALTS Ribosomal RNA large subunit methyltransferase I OS=Salmonella typhimurium (strain SL1344) OX=216597 GN=yccW PE=3 SV=1	1	20	20	20	3	16	18	17	18	13	9	7	1	2	0	0	0	0	0	0	0	0	0	0	0	3	3	7	18	9	7	4	3	1	0	0	0	0	0	0	0	0	0	0
A0A0H3NA09	A0A0H3NA09	1	1	1	tr|A0A0H3NA09|A0A0H3NA09_SALTS Arginine transport ATP-binding protein ArtP OS=Salmonella typhimurium (strain SL1344) OX=216597 GN=artP PE=4 SV=1	1	1	1	1	0	0	0	0	0	0	0	0	0	0	0	0	0	0	0	0	0	0	0	0	1	0	0	0	0	0	0	0	0	0	0	0	0	0	0	0	0	0	0	0
A0A0H3NA15	A0A0H3NA15	9	9	9	tr|A0A0H3NA15|A0A0H3NA15_SALTS BolA protein OS=Salmonella typhimurium (strain SL1344) OX=216597 GN=bolA PE=3 SV=1	1	9	9	9	8	7	5	3	3	1	1	1	0	0	0	0	0	0	0	0	0	0	0	0	0	3	5	4	5	2	1	0	0	0	0	0	0	0	0	0	0	0	0	0
A0A0H3NA16	A0A0H3NA16	30	30	30	tr|A0A0H3NA16|A0A0H3NA16_SALTS Type III secretion system effector protein. Activates Cdc42, RhoG, AktA and chloride secretion through its inositol phosphatase activity and disrupts tight junctions OS=Salmonella typhimurium (strain SL1344) OX=216597 GN=sopB	1	30	30	30	9	20	16	15	16	12	15	11	16	15	17	8	19	13	13	7	8	9	5	4	19	5	4	6	17	5	3	3	3	1	3	4	4	6	5	6	6	6	7	10
A0A0H3NA20	A0A0H3NA20	5	5	5	tr|A0A0H3NA20|A0A0H3NA20_SALTS DNA-binding protein HU-beta OS=Salmonella typhimurium (strain SL1344) OX=216597 GN=hupB PE=3 SV=1	1	5	5	5	5	5	5	5	5	5	5	4	5	5	5	3	5	3	3	1	1	2	2	1	1	4	4	4	5	5	4	3	3	3	3	3	2	2	2	3	2	1	2	2
A0A0H3NA23	A0A0H3NA23	4	4	4	tr|A0A0H3NA23|A0A0H3NA23_SALTS Cold shock-like protein CspD OS=Salmonella typhimurium (strain SL1344) OX=216597 GN=cspD PE=4 SV=1	1	4	4	4	3	3	3	3	3	4	4	4	4	4	4	1	3	1	1	1	1	1	1	1	1	1	1	1	1	1	1	1	2	1	2	2	1	1	1	1	1	1	0	0
A0A0H3NA24	A0A0H3NA24	3	3	3	tr|A0A0H3NA24|A0A0H3NA24_SALTS Hypothetical solute-binding protein OS=Salmonella typhimurium (strain SL1344) OX=216597 GN=ybaE PE=4 SV=1	1	3	3	3	0	1	0	0	0	0	1	1	1	0	0	0	0	0	0	0	0	0	1	0	0	0	0	0	0	0	0	1	1	1	1	0	0	0	0	0	0	0	0	0
A0A0H3NA25	A0A0H3NA25	3	3	3	tr|A0A0H3NA25|A0A0H3NA25_SALTS 4-hydroxyphenylacetate degradation bifunctional isomerase decarboxylase OS=Salmonella typhimurium (strain SL1344) OX=216597 GN=hpaG PE=4 SV=1	1	3	3	3	0	0	1	0	0	0	0	0	0	0	0	0	0	0	0	0	0	0	0	0	0	0	0	0	1	0	0	0	1	0	0	0	0	0	0	0	0	0	0	0
A0A0H3NA28	A0A0H3NA28	6	5	5	tr|A0A0H3NA28|A0A0H3NA28_SALTS Uncharacterized protein OS=Salmonella typhimurium (strain SL1344) OX=216597 GN=SL1344_0888 PE=4 SV=1	1	6	5	5	0	0	4	6	5	5	3	3	3	2	1	0	0	0	0	0	0	0	0	0	0	0	0	0	4	1	1	1	1	1	1	1	0	0	0	0	0	0	0	0
A0A0H3NA37	A0A0H3NA37	9	9	9	tr|A0A0H3NA37|A0A0H3NA37_SALTS Cell division protein FtsK OS=Salmonella typhimurium (strain SL1344) OX=216597 GN=ftsK PE=3 SV=1	1	9	9	9	0	0	0	0	0	0	0	0	0	0	0	0	0	1	0	1	2	0	0	0	3	0	1	1	0	0	0	0	0	0	0	0	0	0	0	0	0	0	0	0
A0A0H3NA43;A0A0H3ND07	A0A0H3NA43;A0A0H3ND07	14;13	14;13	14;13	tr|A0A0H3NA43|A0A0H3NA43_SALTS Anaerobic dimethyl sulfoxide reductase chain B OS=Salmonella typhimurium (strain SL1344) OX=216597 GN=dmsB PE=4 SV=1;tr|A0A0H3ND07|A0A0H3ND07_SALTS Hypothetical anaerobic dimethyl sulfoxide reductase OS=Salmonella typhimurium	2	14	14	14	7	10	11	11	6	8	7	6	6	1	0	0	0	0	0	0	0	0	0	0	3	1	2	2	9	3	2	2	1	1	1	0	0	0	0	0	0	0	0	0
A0A0H3NA44	A0A0H3NA44	9	9	9	tr|A0A0H3NA44|A0A0H3NA44_SALTS Adenine phosphoribosyltransferase OS=Salmonella typhimurium (strain SL1344) OX=216597 GN=apt PE=3 SV=1	1	9	9	9	6	7	5	4	3	4	4	3	2	2	1	0	0	0	0	0	0	0	0	0	0	2	4	3	5	3	1	1	1	1	1	0	0	0	0	0	0	0	0	0
A0A0H3NA46	A0A0H3NA46	4	4	4	tr|A0A0H3NA46|A0A0H3NA46_SALTS Hypothetical transcriptional regulator OS=Salmonella typhimurium (strain SL1344) OX=216597 GN=SL1344_1065 PE=4 SV=1	1	4	4	4	0	1	2	2	3	1	2	1	0	0	0	0	0	0	0	0	0	0	0	0	1	0	0	0	0	1	1	0	0	1	1	1	1	0	0	0	0	0	0	0
A0A0H3NA48	A0A0H3NA48	22	22	22	tr|A0A0H3NA48|A0A0H3NA48_SALTS Adenylate kinase OS=Salmonella typhimurium (strain SL1344) OX=216597 GN=adk PE=3 SV=1	1	22	22	22	22	22	18	14	13	11	9	6	6	4	5	2	2	0	0	0	0	0	0	0	0	3	6	5	16	3	2	2	2	1	1	1	1	1	1	1	1	1	1	1
A0A0H3NA56	A0A0H3NA56	10	10	10	tr|A0A0H3NA56|A0A0H3NA56_SALTS Copper-transporting ATPase OS=Salmonella typhimurium (strain SL1344) OX=216597 GN=copA PE=3 SV=1	1	10	10	10	4	5	4	3	2	2	2	2	2	2	2	0	0	0	0	0	0	0	0	0	3	1	2	2	2	1	0	0	0	0	0	0	0	0	0	0	0	0	0	0
A0A0H3NA63	A0A0H3NA63	6	6	6	tr|A0A0H3NA63|A0A0H3NA63_SALTS Cardiolipin synthase C OS=Salmonella typhimurium (strain SL1344) OX=216597 GN=ymdC PE=3 SV=1	1	6	6	6	0	0	0	0	0	0	0	3	3	3	2	1	0	1	2	2	2	1	0	0	0	0	0	0	0	0	0	0	2	2	2	1	1	1	1	1	1	1	0	0
A0A0H3NA64	A0A0H3NA64	14	14	14	tr|A0A0H3NA64|A0A0H3NA64_SALTS tRNA 2-selenouridine synthase OS=Salmonella typhimurium (strain SL1344) OX=216597 GN=ybbB PE=3 SV=1	1	14	14	14	1	11	11	10	9	7	6	5	3	3	1	0	0	0	0	0	0	0	0	0	0	0	1	1	9	1	0	0	0	0	1	1	0	1	0	0	0	0	0	0
A0A0H3NA66	A0A0H3NA66	4	4	4	tr|A0A0H3NA66|A0A0H3NA66_SALTS Acidic protein MsyB multicopy suppressor of SecY OS=Salmonella typhimurium (strain SL1344) OX=216597 GN=msyB PE=4 SV=1	1	4	4	4	4	2	1	0	0	0	0	0	0	0	0	0	0	0	0	0	0	0	0	0	0	0	1	1	2	0	0	0	0	0	0	0	0	0	0	0	0	0	0	0
A0A0H3NA71	A0A0H3NA71	19	19	19	tr|A0A0H3NA71|A0A0H3NA71_SALTS Dihydroorotase OS=Salmonella typhimurium (strain SL1344) OX=216597 GN=pyrC PE=3 SV=1	1	19	19	19	11	17	9	9	9	7	9	7	4	4	1	0	0	0	0	0	0	0	0	0	0	2	3	3	9	4	3	3	3	3	3	2	1	0	0	0	0	0	0	0
A0A0H3NA74	A0A0H3NA74	16	16	16	tr|A0A0H3NA74|A0A0H3NA74_SALTS UPF0502 protein YceH OS=Salmonella typhimurium (strain SL1344) OX=216597 GN=yceH PE=3 SV=1	1	16	16	16	14	15	13	13	11	10	11	7	6	5	5	1	1	0	0	0	0	0	0	0	0	0	3	6	14	6	4	3	2	2	1	0	0	0	0	0	0	0	0	0
A0A0H3NA75	A0A0H3NA75	80	80	80	tr|A0A0H3NA75|A0A0H3NA75_SALTS 30S ribosomal protein S1 OS=Salmonella typhimurium (strain SL1344) OX=216597 GN=rpsA PE=3 SV=1	1	80	80	80	24	31	31	37	40	43	42	46	46	49	51	42	53	42	51	40	44	57	51	41	47	27	17	21	27	25	28	31	36	38	46	51	54	52	51	46	43	40	40	51
A0A0H3NA79	A0A0H3NA79	8	8	8	tr|A0A0H3NA79|A0A0H3NA79_SALTS Flagella basal body P-ring formation protein FlgA OS=Salmonella typhimurium (strain SL1344) OX=216597 GN=flgA PE=3 SV=1	1	8	8	8	6	5	3	2	1	0	0	0	0	0	0	0	0	0	0	0	0	0	0	0	0	0	3	3	2	1	1	1	1	1	1	0	0	0	0	0	0	0	0	0
A0A0H3NA81	A0A0H3NA81	4	4	4	tr|A0A0H3NA81|A0A0H3NA81_SALTS N5-carboxyaminoimidazole ribonucleotide mutase OS=Salmonella typhimurium (strain SL1344) OX=216597 GN=purE PE=3 SV=1	1	4	4	4	0	2	4	3	3	3	3	3	3	2	1	1	0	0	0	0	0	0	0	0	0	0	0	1	2	1	1	1	1	1	0	0	0	0	1	1	0	0	0	0
A0A0H3NA82	A0A0H3NA82	5	5	5	tr|A0A0H3NA82|A0A0H3NA82_SALTS tRNA 5-carboxymethoxyuridine methyltransferase OS=Salmonella typhimurium (strain SL1344) OX=216597 GN=smtA PE=3 SV=1	1	5	5	5	2	4	2	1	1	1	1	1	1	0	0	0	0	0	0	0	0	0	0	0	0	0	0	0	2	0	0	0	0	0	0	0	0	0	0	0	0	0	0	0
A0A0H3NA83	A0A0H3NA83	2	2	2	tr|A0A0H3NA83|A0A0H3NA83_SALTS Flagellar basal body protein OS=Salmonella typhimurium (strain SL1344) OX=216597 GN=flgF PE=3 SV=1	1	2	2	2	2	1	1	0	0	0	0	0	0	0	0	0	0	0	0	0	0	0	0	0	0	0	0	0	0	0	0	0	0	0	0	0	0	0	0	0	0	0	0	0
A0A0H3NA86	A0A0H3NA86	5	5	5	tr|A0A0H3NA86|A0A0H3NA86_SALTS Hypothetical exported protein OS=Salmonella typhimurium (strain SL1344) OX=216597 GN=SL1344_0532 PE=4 SV=1	1	5	5	5	5	5	0	0	0	0	0	0	0	0	0	0	0	0	0	0	0	0	0	0	0	0	1	0	0	0	0	0	0	0	0	0	0	0	0	0	0	0	0	0
A0A0H3NA87	A0A0H3NA87	29	29	29	tr|A0A0H3NA87|A0A0H3NA87_SALTS Flagellar hook-associated protein 1 OS=Salmonella typhimurium (strain SL1344) OX=216597 GN=flgK PE=3 SV=1	1	29	29	29	8	10	7	5	1	1	1	1	1	0	0	0	0	1	3	3	2	8	7	4	23	1	1	1	7	0	0	0	0	0	0	0	0	0	0	0	0	1	3	7
A0A0H3NA89	A0A0H3NA89	1	1	1	tr|A0A0H3NA89|A0A0H3NA89_SALTS Hypothetical transcriptional regulator OS=Salmonella typhimurium (strain SL1344) OX=216597 GN=SL1344_0938 PE=4 SV=1	1	1	1	1	1	1	1	0	0	0	0	0	0	0	0	0	0	0	0	0	0	0	0	0	0	0	0	0	0	0	0	0	0	0	0	0	0	0	0	0	0	0	0	0
A0A0H3NA94	A0A0H3NA94	17	17	17	tr|A0A0H3NA94|A0A0H3NA94_SALTS 3-oxoacyl-[acyl-carrier-protein] synthase 3 OS=Salmonella typhimurium (strain SL1344) OX=216597 GN=fabH PE=3 SV=1	1	17	17	17	12	15	11	7	5	3	2	1	1	1	1	0	1	1	1	1	1	0	0	0	1	3	6	8	11	6	6	4	4	0	0	0	0	0	0	0	0	0	0	0
A0A0H3NA98	A0A0H3NA98	6	6	6	tr|A0A0H3NA98|A0A0H3NA98_SALTS 4-amino-4-deoxychorismate lyase OS=Salmonella typhimurium (strain SL1344) OX=216597 GN=pabC PE=3 SV=1	1	6	6	6	3	5	5	4	2	1	1	1	1	0	0	0	0	0	0	0	0	0	0	0	0	0	1	1	2	0	0	0	0	0	0	0	0	0	0	0	0	0	0	0
A0A0H3NAA4	A0A0H3NAA4	11	11	11	tr|A0A0H3NAA4|A0A0H3NAA4_SALTS PTS system, glucose-specific IIBC component OS=Salmonella typhimurium (strain SL1344) OX=216597 GN=ptsG PE=4 SV=1	1	11	11	11	0	0	0	0	0	0	0	0	1	1	1	0	2	1	2	2	2	3	1	2	9	2	0	0	0	0	0	0	0	0	0	0	0	0	0	0	0	0	1	2
A0A0H3NAA9	A0A0H3NAA9	2	2	2	tr|A0A0H3NAA9|A0A0H3NAA9_SALTS Thiamine kinase OS=Salmonella typhimurium (strain SL1344) OX=216597 GN=thiK PE=3 SV=1	1	2	2	2	1	0	0	0	0	0	0	0	0	0	0	0	0	0	0	0	0	0	0	0	0	0	0	0	0	0	0	0	0	0	0	0	0	0	0	0	0	1	1	0
A0A0H3NAB5	A0A0H3NAB5	3	3	3	tr|A0A0H3NAB5|A0A0H3NAB5_SALTS Hypothetical TetR-family regulatory protein OS=Salmonella typhimurium (strain SL1344) OX=216597 GN=ycfQ PE=4 SV=1	1	3	3	3	1	2	1	1	1	0	0	0	0	0	0	0	0	0	0	0	0	0	0	0	0	0	0	0	1	0	0	0	0	0	0	0	0	0	0	0	0	0	0	0
A0A0H3NAC0	A0A0H3NAC0	7	7	7	tr|A0A0H3NAC0|A0A0H3NAC0_SALTS Lipoprotein-releasing system ATP-binding protein LolD OS=Salmonella typhimurium (strain SL1344) OX=216597 GN=lolD PE=3 SV=1	1	7	7	7	0	0	0	0	0	0	4	4	4	3	0	0	0	0	0	0	0	0	0	0	3	1	0	0	0	0	0	0	1	1	0	0	0	1	0	1	1	0	0	0
A0A0H3NAC8	A0A0H3NAC8	31	31	31	tr|A0A0H3NAC8|A0A0H3NAC8_SALTS Adenylosuccinate lyase OS=Salmonella typhimurium (strain SL1344) OX=216597 GN=purB PE=3 SV=1	1	31	31	31	0	3	23	24	24	23	21	16	10	4	5	0	3	0	0	0	0	0	0	0	0	3	0	0	24	10	10	9	9	4	2	1	0	0	0	0	0	0	0	0
A0A0H3NAD0	A0A0H3NAD0	2	2	2	tr|A0A0H3NAD0|A0A0H3NAD0_SALTS Bacteriophage tail fibre assembly protein OS=Salmonella typhimurium (strain SL1344) OX=216597 GN=SL1344_0989 PE=4 SV=1	1	2	2	2	2	0	0	0	0	0	0	0	0	0	0	0	0	0	0	0	0	0	0	0	0	0	1	0	0	0	0	0	0	0	0	0	0	0	0	0	0	0	0	0
A0A0H3NAD2	A0A0H3NAD2	52	52	52	tr|A0A0H3NAD2|A0A0H3NAD2_SALTS Aminopeptidase N OS=Salmonella typhimurium (strain SL1344) OX=216597 GN=pepN PE=4 SV=1	1	52	52	52	19	39	39	43	38	28	22	19	13	9	10	3	3	0	0	0	0	0	0	0	0	13	11	20	43	23	21	18	16	8	3	2	1	1	1	1	2	0	0	0
A0A0H3NAD4	A0A0H3NAD4	28	28	28	tr|A0A0H3NAD4|A0A0H3NAD4_SALTS ABC transporter ATP-binding protein OS=Salmonella typhimurium (strain SL1344) OX=216597 GN=uup PE=4 SV=1	1	28	28	28	17	23	14	12	9	3	2	1	1	0	0	0	0	0	0	0	0	0	0	0	0	2	8	7	12	3	3	2	2	1	1	0	0	0	0	0	0	0	0	0
A0A0H3NAD6	A0A0H3NAD6	11	11	11	tr|A0A0H3NAD6|A0A0H3NAD6_SALTS 3-hydroxydecanoyl-[acyl-carrier-protein] dehydratase OS=Salmonella typhimurium (strain SL1344) OX=216597 GN=fabA PE=3 SV=1	1	11	11	11	10	10	8	8	8	7	5	4	2	2	2	2	1	0	1	1	2	1	1	0	1	1	3	4	8	2	2	1	1	1	1	1	1	0	0	0	0	0	0	1
A0A0H3NAD9	A0A0H3NAD9	2	2	2	tr|A0A0H3NAD9|A0A0H3NAD9_SALTS Required for gene induction OS=Salmonella typhimurium (strain SL1344) OX=216597 GN=sxy PE=4 SV=1	1	2	2	2	0	2	2	0	0	0	0	0	0	0	0	0	0	0	0	0	0	0	0	0	0	0	0	0	0	0	0	0	0	0	0	0	0	0	0	0	0	0	0	0
A0A0H3NAE6	A0A0H3NAE6	7	7	7	tr|A0A0H3NAE6|A0A0H3NAE6_SALTS Pseudouridine synthase OS=Salmonella typhimurium (strain SL1344) OX=216597 GN=rluB PE=3 SV=1	1	7	7	7	3	1	0	0	1	0	0	0	1	1	1	0	0	0	0	0	0	0	0	0	0	0	0	0	0	0	0	1	1	0	0	0	0	0	0	0	0	0	0	0
A0A0H3NAF5	A0A0H3NAF5	2	2	2	tr|A0A0H3NAF5|A0A0H3NAF5_SALTS Hypothetical lipoprotein OS=Salmonella typhimurium (strain SL1344) OX=216597 GN=envE PE=4 SV=1	1	2	2	2	2	0	0	0	0	0	0	0	0	0	0	0	0	0	0	0	0	0	0	0	0	0	0	0	0	0	0	0	0	0	0	0	0	0	0	0	0	0	0	0
A0A0H3NAG4	A0A0H3NAG4	7	7	7	tr|A0A0H3NAG4|A0A0H3NAG4_SALTS Uncharacterized protein OS=Salmonella typhimurium (strain SL1344) OX=216597 GN=yccJ PE=4 SV=1	1	7	7	7	7	6	2	1	2	2	3	3	3	3	2	2	1	1	0	0	0	0	0	0	0	2	5	5	4	3	3	3	3	3	3	2	2	2	2	2	2	1	1	0
A0A0H3NAG6	A0A0H3NAG6	5	5	5	tr|A0A0H3NAG6|A0A0H3NAG6_SALTS 2,3-dihydroxybenzoate-AMP ligase OS=Salmonella typhimurium (strain SL1344) OX=216597 GN=entE PE=4 SV=1	1	5	5	5	4	3	2	1	2	1	1	1	1	0	0	0	0	0	0	0	0	0	0	0	0	0	0	0	1	0	0	0	0	0	0	0	0	0	0	0	0	0	0	0
A0A0H3NAG7	A0A0H3NAG7	83	83	83	tr|A0A0H3NAG7|A0A0H3NAG7_SALTS Bifunctional protein PutA OS=Salmonella typhimurium (strain SL1344) OX=216597 GN=putA PE=3 SV=1	1	83	83	83	2	8	57	71	70	70	63	58	53	48	36	11	21	6	8	6	4	4	4	3	22	13	1	3	53	35	32	27	28	20	17	12	7	5	5	4	4	3	3	8
A0A0H3NAH1	A0A0H3NAH1	8	8	8	tr|A0A0H3NAH1|A0A0H3NAH1_SALTS Putative N-acetylmannosamine-6-phosphate 2-epimerase OS=Salmonella typhimurium (strain SL1344) OX=216597 GN=nanE PE=3 SV=1	1	8	8	8	2	5	0	1	0	0	0	0	0	0	0	0	0	0	0	0	0	0	0	0	0	0	1	1	4	0	0	0	0	0	0	0	0	0	0	0	0	0	0	0
A0A0H3NAH3	A0A0H3NAH3	33	33	33	tr|A0A0H3NAH3|A0A0H3NAH3_SALTS Hypothetical substrate-binding transport protein OS=Salmonella typhimurium (strain SL1344) OX=216597 GN=SL1344_1191 PE=4 SV=1	1	33	33	33	24	26	24	19	17	16	13	11	9	7	5	2	1	1	0	0	0	0	0	0	0	7	13	12	25	13	9	8	7	5	6	4	2	1	1	1	0	0	0	0
A0A0H3NAH4	A0A0H3NAH4	18	18	18	tr|A0A0H3NAH4|A0A0H3NAH4_SALTS Glyoxylate/hydroxypyruvate reductase A OS=Salmonella typhimurium (strain SL1344) OX=216597 GN=ycdW PE=3 SV=1	1	18	18	18	10	17	16	11	9	8	5	2	1	1	1	1	0	0	0	0	0	0	0	0	0	2	4	7	15	4	5	3	3	1	1	0	0	0	0	0	0	0	0	0
A0A0H3NAI1	A0A0H3NAI1	1	1	1	tr|A0A0H3NAI1|A0A0H3NAI1_SALTS Hypothetical lysR-family transcriptional regulator OS=Salmonella typhimurium (strain SL1344) OX=216597 GN=ybdO PE=4 SV=1	1	1	1	1	0	0	0	0	0	0	0	1	1	0	0	0	0	0	0	0	0	0	0	0	0	0	0	0	0	0	0	0	0	0	0	0	0	0	0	0	0	0	0	0
A0A0H3NAI9	A0A0H3NAI9	30	30	30	tr|A0A0H3NAI9|A0A0H3NAI9_SALTS Glucans biosynthesis protein G OS=Salmonella typhimurium (strain SL1344) OX=216597 GN=mdoG PE=3 SV=1	1	30	30	30	11	24	24	25	23	21	19	16	14	7	6	0	3	0	0	0	0	0	0	0	0	6	5	9	25	10	11	7	8	2	2	1	1	1	0	0	0	0	0	0
A0A0H3NAJ1	A0A0H3NAJ1	8	8	8	tr|A0A0H3NAJ1|A0A0H3NAJ1_SALTS Regulator of nucleoside diphosphate kinase OS=Salmonella typhimurium (strain SL1344) OX=216597 GN=rnk PE=3 SV=1	1	8	8	8	8	7	5	5	4	3	3	3	2	1	1	0	0	0	0	0	0	0	0	0	0	1	5	2	6	3	2	1	2	1	1	1	0	1	1	1	1	0	0	0
A0A0H3NAJ6	A0A0H3NAJ6	3	3	3	tr|A0A0H3NAJ6|A0A0H3NAJ6_SALTS Citrate lyase alpha chain OS=Salmonella typhimurium (strain SL1344) OX=216597 GN=citF PE=4 SV=1	1	3	3	3	1	0	2	0	0	0	0	0	0	0	0	0	0	0	0	0	0	0	0	0	0	1	0	0	1	1	1	1	0	0	0	0	0	0	0	0	0	0	0	0
A0A0H3NAJ8	A0A0H3NAJ8	9	9	9	tr|A0A0H3NAJ8|A0A0H3NAJ8_SALTS Uncharacterized protein OS=Salmonella typhimurium (strain SL1344) OX=216597 GN=yeaK PE=4 SV=1	1	9	9	9	9	8	5	1	2	1	1	1	0	1	1	0	0	0	1	0	0	1	1	0	2	2	3	3	3	0	0	0	0	0	0	0	0	0	0	0	0	0	0	0
A0A0H3NAK0	A0A0H3NAK0	16	16	16	tr|A0A0H3NAK0|A0A0H3NAK0_SALTS N-methyl-L-tryptophan oxidase OS=Salmonella typhimurium (strain SL1344) OX=216597 GN=solA PE=3 SV=1	1	16	16	16	13	12	11	11	10	8	6	4	3	1	0	1	1	0	0	0	0	0	0	0	1	3	7	6	12	5	4	2	1	1	1	0	0	0	1	0	0	0	0	0
A0A0H3NAK6	A0A0H3NAK6	15	15	15	tr|A0A0H3NAK6|A0A0H3NAK6_SALTS Glutaredoxin 2 OS=Salmonella typhimurium (strain SL1344) OX=216597 GN=grxB PE=4 SV=1	1	15	15	15	14	13	12	9	7	6	6	4	1	0	1	1	0	0	0	0	0	0	0	0	0	3	7	5	12	3	2	1	2	2	2	2	1	1	0	0	0	0	0	0
A0A0H3NAK9	A0A0H3NAK9	10	10	10	tr|A0A0H3NAK9|A0A0H3NAK9_SALTS Peptide methionine sulfoxide reductase MsrB OS=Salmonella typhimurium (strain SL1344) OX=216597 GN=yeaA PE=3 SV=1	1	10	10	10	10	9	8	6	6	4	4	3	2	1	1	0	0	0	0	0	0	0	0	0	0	1	5	7	7	2	1	1	1	1	1	0	0	0	0	0	0	0	0	0
A0A0H3NAL2	A0A0H3NAL2	3	3	3	tr|A0A0H3NAL2|A0A0H3NAL2_SALTS Uncharacterized protein (Fragment) OS=Salmonella typhimurium (strain SL1344) OX=216597 GN=ybeD PE=3 SV=1	1	3	3	3	3	3	1	1	1	1	1	1	1	1	0	0	0	0	0	0	0	0	0	0	0	0	0	0	1	0	0	0	0	0	0	0	0	0	0	0	0	0	0	0
A0A0H3NAL3	A0A0H3NAL3	15	15	15	tr|A0A0H3NAL3|A0A0H3NAL3_SALTS Hypothetical nitroreductase OS=Salmonella typhimurium (strain SL1344) OX=216597 GN=ydjA PE=4 SV=1	1	15	15	15	13	13	12	11	11	10	10	8	5	6	5	2	2	1	0	1	0	0	0	0	0	5	11	10	11	7	6	5	5	3	3	2	2	2	1	1	1	0	1	0
A0A0H3NAL6	A0A0H3NAL6	3	3	3	tr|A0A0H3NAL6|A0A0H3NAL6_SALTS Flagellar basal-body rod protein FlgC OS=Salmonella typhimurium (strain SL1344) OX=216597 GN=flgC PE=3 SV=1	1	3	3	3	1	0	0	0	0	0	0	0	0	0	0	0	0	0	0	0	0	0	0	0	0	0	0	0	0	0	0	0	0	0	0	0	0	0	0	0	0	0	0	1
A0A0H3NAL7	A0A0H3NAL7	6	6	6	tr|A0A0H3NAL7|A0A0H3NAL7_SALTS Ribosomal RNA large subunit methyltransferase H OS=Salmonella typhimurium (strain SL1344) OX=216597 GN=ybeA PE=3 SV=1	1	6	6	6	6	5	5	0	1	0	2	1	2	1	0	0	0	0	0	0	0	0	0	0	0	1	3	3	5	0	0	0	0	0	1	0	0	0	0	0	0	0	0	0
A0A0H3NAL9	A0A0H3NAL9	2	2	2	tr|A0A0H3NAL9|A0A0H3NAL9_SALTS Hypothetical MutT-family protein OS=Salmonella typhimurium (strain SL1344) OX=216597 GN=SL1344_1236 PE=3 SV=1	1	2	2	2	1	0	0	0	0	0	0	0	0	0	0	0	0	0	0	0	0	0	0	0	0	0	1	1	0	0	0	0	0	0	0	0	0	0	0	0	0	0	0	0
A0A0H3NAM1	A0A0H3NAM1	3	3	3	tr|A0A0H3NAM1|A0A0H3NAM1_SALTS DNA polymerase III, delta subunit OS=Salmonella typhimurium (strain SL1344) OX=216597 GN=holA PE=4 SV=1	1	3	3	3	0	0	0	0	0	0	0	1	1	0	1	0	0	0	0	0	0	0	0	0	1	1	0	0	0	0	0	0	0	0	0	0	0	0	0	0	0	0	0	0
A0A0H3NAM2	A0A0H3NAM2	3	3	3	tr|A0A0H3NAM2|A0A0H3NAM2_SALTS Flagellar L-ring protein OS=Salmonella typhimurium (strain SL1344) OX=216597 GN=flgH PE=3 SV=1	1	3	3	3	0	0	0	0	0	0	0	0	0	0	0	0	0	0	0	0	0	0	0	0	3	0	0	0	0	0	0	0	0	0	0	0	0	0	0	0	0	0	0	0
A0A0H3NAM4	A0A0H3NAM4	9	9	9	tr|A0A0H3NAM4|A0A0H3NAM4_SALTS N-succinylarginine dihydrolase OS=Salmonella typhimurium (strain SL1344) OX=216597 GN=astB PE=3 SV=1	1	9	9	9	1	5	7	3	4	2	0	0	0	0	0	0	0	0	0	0	0	0	0	0	0	0	0	0	4	1	1	1	0	0	0	0	0	0	0	0	0	0	0	0
A0A0H3NAM6	A0A0H3NAM6	91	91	91	tr|A0A0H3NAM6|A0A0H3NAM6_SALTS Ribonuclease E OS=Salmonella typhimurium (strain SL1344) OX=216597 GN=rne PE=3 SV=1	1	91	91	91	1	1	1	1	5	5	22	29	41	53	57	49	68	63	63	53	40	49	38	20	45	12	0	0	1	0	1	6	9	11	17	28	37	36	34	29	27	25	25	31
A0A0H3NAN0	A0A0H3NAN0	6	6	6	tr|A0A0H3NAN0|A0A0H3NAN0_SALTS Uncharacterized protein OS=Salmonella typhimurium (strain SL1344) OX=216597 GN=yceD PE=4 SV=1	1	6	6	6	6	5	5	1	1	2	1	1	2	2	2	1	1	0	0	0	0	0	0	0	0	0	1	0	3	2	0	0	0	0	0	0	0	0	0	0	0	0	0	0
A0A0H3NAN4	A0A0H3NAN4	13	13	13	tr|A0A0H3NAN4|A0A0H3NAN4_SALTS 3-oxoacyl-[acyl-carrier protein] reductase OS=Salmonella typhimurium (strain SL1344) OX=216597 GN=fabG PE=4 SV=1	1	13	13	13	12	12	12	12	12	10	11	10	8	7	4	0	2	0	0	0	0	0	0	0	3	5	6	7	10	7	6	5	5	2	1	1	2	0	0	0	0	0	0	0
A0A0H3NAN5	A0A0H3NAN5	7	7	7	tr|A0A0H3NAN5|A0A0H3NAN5_SALTS Glutamate/aspartate transport ATP-binding protein GltL OS=Salmonella typhimurium (strain SL1344) OX=216597 GN=gltL PE=4 SV=1	1	7	7	7	6	4	3	0	0	0	2	0	0	0	0	0	0	0	0	0	1	0	0	0	3	0	0	0	3	0	0	0	0	0	0	0	0	0	0	0	0	0	0	0
A0A0H3NAN8	A0A0H3NAN8	4	4	4	tr|A0A0H3NAN8|A0A0H3NAN8_SALTS Osmotically inducible lipoprotein E OS=Salmonella typhimurium (strain SL1344) OX=216597 GN=osmE PE=4 SV=1	1	4	4	4	2	0	0	0	0	1	3	0	2	1	1	1	2	1	3	0	1	0	0	0	3	0	0	0	0	0	0	0	0	0	0	0	0	0	0	0	0	0	0	0
A0A0H3NAN9	A0A0H3NAN9	15	15	15	tr|A0A0H3NAN9|A0A0H3NAN9_SALTS Thymidylate kinase OS=Salmonella typhimurium (strain SL1344) OX=216597 GN=tmk PE=3 SV=1	1	15	15	15	11	9	9	5	2	1	2	1	2	2	2	0	0	0	0	0	0	0	0	0	0	1	3	2	5	2	1	0	0	0	0	0	0	0	0	0	0	0	0	0
A0A0H3NAP1	A0A0H3NAP1	10	10	10	tr|A0A0H3NAP1|A0A0H3NAP1_SALTS Haemolysin-related protein OS=Salmonella typhimurium (strain SL1344) OX=216597 GN=ybeX PE=4 SV=1	1	10	10	10	6	6	6	4	5	2	1	0	0	0	0	0	0	0	0	0	0	0	0	0	0	1	1	2	6	1	0	0	0	0	0	0	0	0	0	0	0	0	0	0
A0A0H3NAP3	A0A0H3NAP3	16	16	16	tr|A0A0H3NAP3|A0A0H3NAP3_SALTS Phospho-beta-glucosidase B OS=Salmonella typhimurium (strain SL1344) OX=216597 GN=celF PE=3 SV=1	1	16	16	16	0	2	11	12	13	9	11	5	1	0	0	0	0	0	0	0	0	0	0	0	0	0	0	0	3	2	2	2	0	0	0	0	0	0	0	0	0	0	0	0
A0A0H3NAP4	A0A0H3NAP4	8	8	8	tr|A0A0H3NAP4|A0A0H3NAP4_SALTS Uncharacterized protein OS=Salmonella typhimurium (strain SL1344) OX=216597 GN=ycfF PE=4 SV=1	1	8	8	8	6	6	6	4	4	3	4	3	1	1	1	0	0	0	0	0	0	0	0	0	0	2	4	4	4	3	2	2	1	1	1	0	0	0	0	0	0	0	0	0
A0A0H3NAP8	A0A0H3NAP8	15	15	15	tr|A0A0H3NAP8|A0A0H3NAP8_SALTS UPF0227 protein YcfP OS=Salmonella typhimurium (strain SL1344) OX=216597 GN=ycfP PE=3 SV=1	1	15	15	15	14	14	12	7	9	6	6	5	4	2	1	0	1	0	0	0	0	0	0	0	0	5	7	6	11	2	2	2	1	1	0	0	0	0	1	0	0	0	0	0
A0A0H3NAQ1	A0A0H3NAQ1	15	15	15	tr|A0A0H3NAQ1|A0A0H3NAQ1_SALTS Glucosamine-6-phosphate deaminase OS=Salmonella typhimurium (strain SL1344) OX=216597 GN=nagB PE=3 SV=1	1	15	15	15	3	6	11	13	13	12	11	8	4	5	5	1	2	1	2	2	1	0	0	0	0	4	2	3	13	9	8	6	6	5	5	4	3	1	1	0	1	0	0	0
A0A0H3NAQ3	A0A0H3NAQ3	8	8	8	tr|A0A0H3NAQ3|A0A0H3NAQ3_SALTS Hypothetical exported protein OS=Salmonella typhimurium (strain SL1344) OX=216597 GN=ycfS PE=4 SV=1	1	8	8	8	7	7	1	0	0	0	0	0	0	0	0	0	0	0	0	0	0	0	0	0	0	1	1	1	0	0	0	0	0	0	0	0	0	0	0	0	0	0	0	0
A0A0H3NAQ6	A0A0H3NAQ6	9	9	9	tr|A0A0H3NAQ6|A0A0H3NAQ6_SALTS N-acetyl-D-glucosamine kinase OS=Salmonella typhimurium (strain SL1344) OX=216597 GN=ycfX PE=3 SV=1	1	9	9	9	4	7	4	3	3	2	1	0	1	0	0	0	0	0	0	0	0	0	0	0	0	1	2	3	5	2	1	0	0	0	0	0	0	0	0	0	0	0	0	0
A0A0H3NAQ7	A0A0H3NAQ7	8	8	8	tr|A0A0H3NAQ7|A0A0H3NAQ7_SALTS Flavodoxin OS=Salmonella typhimurium (strain SL1344) OX=216597 GN=fldA PE=3 SV=1	1	8	8	8	8	7	7	5	5	6	4	3	3	3	3	3	3	1	1	1	0	0	0	0	0	5	5	5	6	5	5	5	5	4	4	2	2	3	3	2	1	0	0	0
A0A0H3NAQ9	A0A0H3NAQ9	15	15	15	tr|A0A0H3NAQ9|A0A0H3NAQ9_SALTS Phosphofructokinase OS=Salmonella typhimurium (strain SL1344) OX=216597 GN=pfkB PE=3 SV=1	1	15	15	15	14	14	13	13	13	10	8	5	4	2	3	1	2	0	0	0	0	0	0	0	0	6	9	9	14	7	8	7	6	6	5	4	3	2	1	1	1	0	0	0
A0A0H3NAR0	A0A0H3NAR0	4	4	4	tr|A0A0H3NAR0|A0A0H3NAR0_SALTS Spermidine/putrescine import ATP-binding protein PotA OS=Salmonella typhimurium (strain SL1344) OX=216597 GN=potA PE=3 SV=1	1	4	4	4	1	1	1	0	0	0	0	1	0	0	0	0	0	0	0	0	0	0	0	0	2	0	0	0	0	0	0	0	0	0	0	0	0	0	0	0	0	0	0	0
A0A0H3NAR1	A0A0H3NAR1	3	3	3	tr|A0A0H3NAR1|A0A0H3NAR1_SALTS Possible 5-nitroimidazole antibiotic resistance OS=Salmonella typhimurium (strain SL1344) OX=216597 GN=SL1344_0681 PE=4 SV=1	1	3	3	3	2	3	2	0	0	0	0	0	0	0	0	0	0	0	0	0	0	0	0	0	0	0	0	0	1	0	0	0	0	0	0	0	0	0	0	0	0	0	0	0
A0A0H3NAR5	A0A0H3NAR5	13	13	13	tr|A0A0H3NAR5|A0A0H3NAR5_SALTS tRNA-specific 2-thiouridylase MnmA OS=Salmonella typhimurium (strain SL1344) OX=216597 GN=mnmA PE=3 SV=1	1	13	13	13	13	12	9	7	6	4	5	4	2	0	0	0	0	0	0	0	0	0	0	0	0	0	3	5	10	2	3	3	3	1	1	0	0	0	0	0	0	0	0	0
A0A0H3NAR7	A0A0H3NAR7	2	2	2	tr|A0A0H3NAR7|A0A0H3NAR7_SALTS Predicted bacteriophage protein OS=Salmonella typhimurium (strain SL1344) OX=216597 GN=SL1344_1177 PE=4 SV=1	1	2	2	2	0	1	1	1	1	0	0	0	0	0	0	0	1	0	0	0	0	0	0	0	0	0	0	0	0	0	0	0	0	0	0	0	0	0	0	0	0	0	0	0
A0A0H3NAS0	A0A0H3NAS0	14	14	14	tr|A0A0H3NAS0|A0A0H3NAS0_SALTS 50S ribosomal protein L20 OS=Salmonella typhimurium (strain SL1344) OX=216597 GN=rpl20 PE=3 SV=1	1	14	14	14	3	3	3	4	4	3	2	2	2	2	3	1	3	2	4	3	4	12	11	7	8	2	1	1	2	2	1	0	1	1	0	1	2	2	4	6	6	6	6	10
A0A0H3NAS5	A0A0H3NAS5	8	8	8	tr|A0A0H3NAS5|A0A0H3NAS5_SALTS Thioredoxin/glutathione peroxidase BtuE OS=Salmonella typhimurium (strain SL1344) OX=216597 GN=btuE PE=3 SV=1	1	8	8	8	7	6	4	4	2	2	2	1	0	0	0	0	0	0	0	0	0	0	0	0	0	1	4	1	3	1	1	1	1	1	1	1	0	0	0	0	0	0	0	0
A0A0H3NAU1	A0A0H3NAU1	4	4	4	tr|A0A0H3NAU1|A0A0H3NAU1_SALTS Uncharacterized protein OS=Salmonella typhimurium (strain SL1344) OX=216597 GN=SL1344_1198 PE=4 SV=1	1	4	4	4	4	3	0	0	0	0	0	0	0	0	0	0	0	0	0	0	0	0	0	0	0	0	1	1	1	0	0	0	0	0	0	0	0	0	0	0	0	0	0	0
A0A0H3NAU2	A0A0H3NAU2	53	53	53	tr|A0A0H3NAU2|A0A0H3NAU2_SALTS Dihydrolipoyllysine-residue succinyltransferase component of 2-oxoglutarate dehydrogenase complex OS=Salmonella typhimurium (strain SL1344) OX=216597 GN=sucB PE=3 SV=1	1	53	53	53	6	8	9	14	17	17	18	18	30	34	45	34	36	31	26	21	15	12	12	4	8	12	1	2	5	5	12	13	16	16	21	25	27	24	22	19	18	12	11	14
A0A0H3NAV1	A0A0H3NAV1	6	6	6	tr|A0A0H3NAV1|A0A0H3NAV1_SALTS TolA protein OS=Salmonella typhimurium (strain SL1344) OX=216597 GN=tolA PE=4 SV=1	1	6	6	6	0	0	1	0	1	0	0	0	0	0	0	0	0	0	0	0	0	0	0	0	4	0	0	0	0	0	0	0	0	0	0	0	0	0	0	1	1	1	1	1
A0A0H3NAW1	A0A0H3NAW1	5	5	5	tr|A0A0H3NAW1|A0A0H3NAW1_SALTS Hypothetical hydro-lyase OS=Salmonella typhimurium (strain SL1344) OX=216597 GN=SL1344_0739 PE=4 SV=1	1	5	5	5	4	3	3	3	2	1	1	0	0	0	0	0	0	0	0	0	0	0	0	0	0	0	1	2	2	2	2	1	0	0	0	0	0	0	0	0	0	0	0	0
A0A0H3NAW2	A0A0H3NAW2	6	6	6	tr|A0A0H3NAW2|A0A0H3NAW2_SALTS Cysteine desulfurase OS=Salmonella typhimurium (strain SL1344) OX=216597 GN=sufS PE=3 SV=1	1	6	6	6	0	3	5	3	0	0	0	0	0	0	0	0	0	0	0	0	0	0	0	0	0	0	0	0	2	0	0	0	0	0	0	0	0	0	0	0	0	0	0	0
A0A0H3NAW3	A0A0H3NAW3	2	2	2	tr|A0A0H3NAW3|A0A0H3NAW3_SALTS UPF0229 protein YeaH OS=Salmonella typhimurium (strain SL1344) OX=216597 GN=yeaH PE=3 SV=1	1	2	2	2	0	0	1	1	1	0	0	0	1	1	1	1	0	0	0	0	0	0	0	0	0	0	0	0	1	0	0	0	0	0	0	0	0	0	0	0	0	0	0	0
A0A0H3NAW7;A0A0H3N8M2	A0A0H3NAW7	20;1	20;1	20;1	tr|A0A0H3NAW7|A0A0H3NAW7_SALTS Putative glucose-6-phosphate 1-epimerase OS=Salmonella typhimurium (strain SL1344) OX=216597 GN=yeaD PE=3 SV=1	2	20	20	20	16	16	14	13	12	10	7	4	4	2	3	2	1	0	0	0	0	0	0	0	0	4	15	13	14	7	4	3	4	2	3	3	3	2	2	2	2	0	0	1
A0A0H3NAW8	A0A0H3NAW8	38	38	38	tr|A0A0H3NAW8|A0A0H3NAW8_SALTS Pyruvate kinase OS=Salmonella typhimurium (strain SL1344) OX=216597 GN=pykF PE=3 SV=1	1	38	38	38	3	20	29	33	31	31	29	26	26	21	19	6	14	4	4	3	1	3	2	2	1	11	0	11	32	25	24	21	18	17	14	11	5	6	5	4	3	2	4	3
A0A0H3NAX0	A0A0H3NAX0	15	15	15	tr|A0A0H3NAX0|A0A0H3NAX0_SALTS Aldose 1-epimerase OS=Salmonella typhimurium (strain SL1344) OX=216597 GN=galM PE=3 SV=1	1	15	15	15	12	12	13	12	8	5	6	5	4	3	2	2	2	1	1	0	0	0	0	0	0	6	7	8	12	6	5	4	4	1	0	0	0	0	0	0	0	0	0	0
A0A0H3NAX1	A0A0H3NAX1	4	4	4	tr|A0A0H3NAX1|A0A0H3NAX1_SALTS Pyrazinamidase/nicotinamidase OS=Salmonella typhimurium (strain SL1344) OX=216597 GN=nam PE=4 SV=1	1	4	4	4	4	2	2	1	0	0	0	0	0	0	0	0	0	0	0	0	0	0	0	0	0	0	0	0	1	0	0	0	0	0	0	0	0	0	0	0	0	0	0	0
A0A0H3NAX5	A0A0H3NAX5	12	12	12	tr|A0A0H3NAX5|A0A0H3NAX5_SALTS Hypothetical molybdenum transport ATP-binding protein ModF (Photorepair protein PhrA) OS=Salmonella typhimurium (strain SL1344) OX=216597 GN=modF PE=4 SV=1	1	12	12	12	7	8	4	2	0	2	3	6	5	2	0	0	0	0	0	0	0	0	0	0	0	2	2	2	5	2	0	0	1	1	1	1	1	0	0	0	0	0	0	0
A0A0H3NAX6	A0A0H3NAX6	11	11	11	tr|A0A0H3NAX6|A0A0H3NAX6_SALTS DNA topoisomerase 3 OS=Salmonella typhimurium (strain SL1344) OX=216597 GN=topB PE=3 SV=1	1	11	11	11	0	0	0	0	1	3	7	7	5	4	5	2	1	0	0	0	0	0	0	0	0	0	0	0	0	0	0	1	1	1	1	0	0	0	0	0	0	0	0	0
A0A0H3NAX9	A0A0H3NAX9	3	3	3	tr|A0A0H3NAX9|A0A0H3NAX9_SALTS Uncharacterized protein OS=Salmonella typhimurium (strain SL1344) OX=216597 GN=orf70 PE=4 SV=1	1	3	3	3	3	3	0	0	0	0	0	0	0	0	0	0	0	0	0	0	0	0	0	0	0	1	1	1	1	1	0	0	0	0	0	0	0	0	0	0	0	0	0	0
A0A0H3NAY0	A0A0H3NAY0	25	25	23	tr|A0A0H3NAY0|A0A0H3NAY0_SALTS Succinylornithine transaminase OS=Salmonella typhimurium (strain SL1344) OX=216597 GN=argDa PE=3 SV=1	1	25	25	23	9	16	19	16	11	7	5	3	3	3	1	0	0	0	0	0	0	0	0	0	0	5	3	9	20	9	7	6	3	1	1	0	0	0	0	0	0	0	0	0
A0A0H3NAY3	A0A0H3NAY3	8	8	8	tr|A0A0H3NAY3|A0A0H3NAY3_SALTS Molybdenum import ATP-binding protein ModC OS=Salmonella typhimurium (strain SL1344) OX=216597 GN=modC PE=3 SV=1	1	8	8	8	1	1	1	0	0	0	1	2	1	1	1	0	0	0	0	0	0	0	0	0	4	0	0	0	0	0	0	0	0	0	0	1	1	0	0	0	0	0	0	0
A0A0H3NAY6	A0A0H3NAY6	11	11	11	tr|A0A0H3NAY6|A0A0H3NAY6_SALTS Exported protein OS=Salmonella typhimurium (strain SL1344) OX=216597 GN=SL1344_1243 PE=4 SV=1	1	11	11	11	11	11	11	5	6	3	3	2	2	0	0	0	0	0	0	0	0	0	0	0	0	0	0	0	8	0	0	0	0	0	0	0	0	0	0	0	0	0	0	0
A0A0H3NAY8	A0A0H3NAY8	15	15	15	tr|A0A0H3NAY8|A0A0H3NAY8_SALTS Formimidoylglutamase OS=Salmonella typhimurium (strain SL1344) OX=216597 GN=hutG PE=3 SV=1	1	15	15	15	1	7	9	7	6	4	6	5	4	1	1	0	0	0	0	0	0	0	0	0	0	0	0	0	9	0	0	0	0	0	0	0	0	0	0	0	0	0	0	0
A0A0H3NAZ4	A0A0H3NAZ4	44	44	44	tr|A0A0H3NAZ4|A0A0H3NAZ4_SALTS Catalase OS=Salmonella typhimurium (strain SL1344) OX=216597 GN=katE PE=3 SV=1	1	44	44	44	4	13	15	22	34	38	39	35	32	28	19	5	8	5	2	2	0	0	0	1	0	2	1	1	10	4	5	10	8	7	5	2	2	3	2	2	3	1	1	0
A0A0H3NB00	A0A0H3NB00	15	15	15	tr|A0A0H3NB00|A0A0H3NB00_SALTS UvrABC system protein B OS=Salmonella typhimurium (strain SL1344) OX=216597 GN=uvrB PE=3 SV=1	1	15	15	15	9	14	7	5	5	4	2	1	1	1	0	0	0	0	0	0	0	0	0	0	0	0	1	2	3	0	0	0	0	0	0	0	0	0	0	0	0	0	0	0
A0A0H3NB04	A0A0H3NB04	4	4	4	tr|A0A0H3NB04|A0A0H3NB04_SALTS Hypothetical outer membrane protein OS=Salmonella typhimurium (strain SL1344) OX=216597 GN=SL1344_1263 PE=4 SV=1	1	4	4	4	1	1	1	1	1	1	1	1	1	1	0	0	1	0	0	0	0	0	0	0	1	0	0	0	1	0	0	0	0	0	0	0	0	0	0	0	0	0	0	0
A0A0H3NB06	A0A0H3NB06	12	12	12	tr|A0A0H3NB06|A0A0H3NB06_SALTS Cyclic pyranopterin monophosphate synthase OS=Salmonella typhimurium (strain SL1344) OX=216597 GN=moaC PE=3 SV=1	1	12	12	12	6	11	9	5	5	0	1	0	0	0	0	1	0	0	0	0	0	0	0	0	0	3	1	4	7	2	2	1	0	0	0	0	0	0	0	0	0	0	0	0
A0A0H3NB09	A0A0H3NB09	57	57	57	tr|A0A0H3NB09|A0A0H3NB09_SALTS Threonine--tRNA ligase OS=Salmonella typhimurium (strain SL1344) OX=216597 GN=thrS PE=3 SV=1	1	57	57	57	16	44	49	47	46	38	37	27	21	13	13	2	6	2	1	1	1	0	0	0	1	8	3	16	41	12	13	12	12	11	5	3	2	0	0	0	0	0	0	0
A0A0H3NB12	A0A0H3NB12	63	63	63	tr|A0A0H3NB12|A0A0H3NB12_SALTS Phenylalanine--tRNA ligase beta subunit OS=Salmonella typhimurium (strain SL1344) OX=216597 GN=pheT PE=3 SV=1	1	63	63	63	1	5	47	54	56	52	42	38	32	25	20	8	6	1	1	1	0	0	0	0	0	20	1	15	48	38	39	35	34	28	20	13	7	8	6	3	5	2	1	1
A0A0H3NB13	A0A0H3NB13	1	1	1	tr|A0A0H3NB13|A0A0H3NB13_SALTS Type III secretion system protein OS=Salmonella typhimurium (strain SL1344) OX=216597 GN=ssaQ PE=4 SV=1	1	1	1	1	1	0	0	0	0	0	0	0	0	0	0	0	0	0	0	0	0	0	0	0	0	0	0	0	0	0	0	0	0	0	0	0	0	0	0	0	0	0	0	0
A0A0H3NB18	A0A0H3NB18	17	17	17	tr|A0A0H3NB18|A0A0H3NB18_SALTS HTH-type transcriptional repressor PurR OS=Salmonella typhimurium (strain SL1344) OX=216597 GN=purR PE=3 SV=1	1	17	17	17	7	12	12	14	14	13	10	5	5	2	1	0	0	0	0	0	0	0	0	0	0	0	0	0	7	0	0	0	0	0	0	0	0	0	0	0	0	0	0	0
A0A0H3NB20	A0A0H3NB20	8	8	8	tr|A0A0H3NB20|A0A0H3NB20_SALTS Phosphoenolpyruvate synthase regulatory protein OS=Salmonella typhimurium (strain SL1344) OX=216597 GN=ydiA PE=3 SV=1	1	8	8	8	6	8	6	5	4	2	1	0	0	0	0	0	0	0	0	0	0	0	0	0	1	1	3	3	6	3	2	1	1	0	0	0	0	0	0	0	0	0	0	0
A0A0H3NB21	A0A0H3NB21	2	2	2	tr|A0A0H3NB21|A0A0H3NB21_SALTS Hypothetical tetR-family transcriptional regulator OS=Salmonella typhimurium (strain SL1344) OX=216597 GN=ybiH PE=4 SV=1	1	2	2	2	2	2	0	0	0	0	0	0	0	0	0	0	0	0	0	0	0	0	0	0	0	0	0	0	0	0	0	0	0	0	0	0	0	0	0	0	0	0	0	0
A0A0H3NB22	A0A0H3NB22	6	6	6	tr|A0A0H3NB22|A0A0H3NB22_SALTS Lactoylglutathione lyase OS=Salmonella typhimurium (strain SL1344) OX=216597 GN=gloA PE=3 SV=1	1	6	6	6	4	3	3	3	0	1	1	0	0	0	0	0	0	0	0	0	0	0	0	0	0	1	2	2	4	2	2	1	1	0	0	0	0	0	0	0	0	0	0	0
A0A0H3NB25	A0A0H3NB25	2	2	2	tr|A0A0H3NB25|A0A0H3NB25_SALTS Hypothetical Zinc-finger containing protein OS=Salmonella typhimurium (strain SL1344) OX=216597 GN=ybiI PE=4 SV=1	1	2	2	2	2	2	1	0	0	0	0	0	0	0	0	0	0	0	0	0	0	0	0	0	0	0	0	0	0	0	0	0	0	0	0	0	0	0	0	0	0	0	0	0
A0A0H3NB27	A0A0H3NB27	4	4	4	tr|A0A0H3NB27|A0A0H3NB27_SALTS Superoxide dismutase [Cu-Zn] OS=Salmonella typhimurium (strain SL1344) OX=216597 GN=sodCb PE=3 SV=1	1	4	4	4	2	1	0	0	0	0	0	0	0	0	0	0	0	0	0	0	0	0	0	0	0	0	2	0	1	0	0	0	0	0	0	0	0	0	0	0	0	0	0	0
A0A0H3NB28	A0A0H3NB28	15	15	15	tr|A0A0H3NB28|A0A0H3NB28_SALTS 3-dehydroquinate dehydratase OS=Salmonella typhimurium (strain SL1344) OX=216597 GN=aroD PE=3 SV=1	1	15	15	15	13	11	9	5	4	3	2	0	0	0	0	0	0	0	0	0	0	0	0	0	0	0	3	3	6	1	0	0	0	0	0	0	0	0	0	0	0	0	0	0
A0A0H3NB31	A0A0H3NB31	5	5	5	tr|A0A0H3NB31|A0A0H3NB31_SALTS Outer membrane lipoprotein SlyB OS=Salmonella typhimurium (strain SL1344) OX=216597 GN=slyB PE=4 SV=1	1	5	5	5	1	0	0	0	1	1	1	1	2	2	2	4	2	4	2	3	3	1	2	2	2	0	0	0	0	0	0	1	1	1	1	1	1	1	1	1	1	1	1	2
A0A0H3NB32	A0A0H3NB32	10	10	10	tr|A0A0H3NB32|A0A0H3NB32_SALTS Conserved hypothetical FAD-binding protein OS=Salmonella typhimurium (strain SL1344) OX=216597 GN=ydiJ PE=4 SV=1	1	10	10	10	0	0	0	0	2	0	0	1	0	0	0	0	0	0	0	0	0	0	0	1	8	0	0	0	0	0	0	0	0	0	0	0	0	0	0	0	0	0	0	0
A0A0H3NB33	A0A0H3NB33	20	20	20	tr|A0A0H3NB33|A0A0H3NB33_SALTS Glutamine-binding periplasmic protein OS=Salmonella typhimurium (strain SL1344) OX=216597 GN=glnH PE=3 SV=1	1	20	20	20	20	20	18	15	17	12	11	8	8	7	5	4	4	1	1	1	1	0	0	0	0	6	12	11	17	11	11	10	7	7	6	5	5	5	4	2	3	0	0	1
A0A0H3NB36	A0A0H3NB36	7	7	7	tr|A0A0H3NB36|A0A0H3NB36_SALTS Uncharacterized protein OS=Salmonella typhimurium (strain SL1344) OX=216597 GN=sufB PE=4 SV=1	1	7	7	7	0	1	3	4	3	2	0	0	0	0	0	0	0	0	0	0	0	0	0	0	0	0	0	1	3	1	1	1	0	0	0	0	0	0	0	0	0	0	0	0
A0A0H3NB37	A0A0H3NB37	12	12	12	tr|A0A0H3NB37|A0A0H3NB37_SALTS Pyridoxal kinase PdxY OS=Salmonella typhimurium (strain SL1344) OX=216597 GN=pdxY PE=3 SV=1	1	12	12	12	9	10	8	6	6	5	4	3	2	2	1	0	1	0	0	0	0	0	0	0	0	3	5	5	9	5	3	2	0	0	0	0	0	0	0	0	0	0	0	0
A0A0H3NB41	A0A0H3NB41	15	15	15	tr|A0A0H3NB41|A0A0H3NB41_SALTS Hypothetical exported protein OS=Salmonella typhimurium (strain SL1344) OX=216597 GN=ynhG PE=4 SV=1	1	15	15	15	11	10	9	4	4	3	2	1	0	0	0	0	0	0	0	0	0	0	0	0	0	1	2	0	7	1	0	0	0	0	0	0	0	0	0	0	0	0	0	0
A0A0H3NB42	A0A0H3NB42	1	1	1	tr|A0A0H3NB42|A0A0H3NB42_SALTS Ion-translocating oxidoreductase complex subunit G OS=Salmonella typhimurium (strain SL1344) OX=216597 GN=rnfG PE=3 SV=1	1	1	1	1	0	0	0	0	0	0	0	0	0	0	0	0	0	0	0	0	0	0	0	0	1	0	0	0	0	0	0	0	0	0	0	0	0	0	0	0	0	0	0	0
A0A0H3NB44	A0A0H3NB44	2	2	2	tr|A0A0H3NB44|A0A0H3NB44_SALTS Uncharacterized protein OS=Salmonella typhimurium (strain SL1344) OX=216597 GN=ybiU PE=4 SV=1	1	2	2	2	2	2	1	0	0	0	0	0	0	0	0	0	0	0	0	0	0	0	0	0	0	0	0	0	1	0	0	0	0	0	0	0	0	0	0	0	0	0	0	0
A0A0H3NB47	A0A0H3NB47	5	5	5	tr|A0A0H3NB47|A0A0H3NB47_SALTS Hypothetical hydrolase OS=Salmonella typhimurium (strain SL1344) OX=216597 GN=orf32 PE=4 SV=1	1	5	5	5	2	2	0	0	0	0	0	0	0	0	0	0	0	0	0	0	0	0	0	0	0	0	3	1	1	0	0	0	0	1	1	0	0	0	0	0	0	0	0	0
A0A0H3NB52	A0A0H3NB52	19	19	19	tr|A0A0H3NB52|A0A0H3NB52_SALTS Mannose-6-phosphate isomerase OS=Salmonella typhimurium (strain SL1344) OX=216597 GN=manA PE=3 SV=1	1	19	19	19	19	19	16	14	14	12	10	7	5	2	2	1	1	0	0	0	0	0	0	0	0	5	6	6	13	4	2	1	1	1	2	2	0	0	0	0	0	0	0	0
A0A0H3NB53	A0A0H3NB53	16	16	16	tr|A0A0H3NB53|A0A0H3NB53_SALTS Molybdopterin biosynthesis MoeA protein OS=Salmonella typhimurium (strain SL1344) OX=216597 GN=moeA PE=4 SV=1	1	16	16	16	10	13	12	10	11	8	6	5	3	1	1	0	0	0	0	0	0	0	0	0	0	3	2	2	10	4	3	2	1	0	0	1	1	1	1	1	0	0	0	0
A0A0H3NB60	A0A0H3NB60	25	25	25	tr|A0A0H3NB60|A0A0H3NB60_SALTS Hypothetical exported protein OS=Salmonella typhimurium (strain SL1344) OX=216597 GN=ydgH PE=4 SV=1	1	25	25	25	20	19	17	15	16	13	12	11	9	10	9	3	6	3	5	3	2	1	0	0	5	5	11	10	19	8	6	4	5	4	4	2	1	2	2	1	1	0	0	0
A0A0H3NB74	A0A0H3NB74	3	3	3	tr|A0A0H3NB74|A0A0H3NB74_SALTS Hypothetical ABC transporter periplasmic binding protein OS=Salmonella typhimurium (strain SL1344) OX=216597 GN=SL1344_1423 PE=4 SV=1	1	3	3	3	2	2	0	0	0	0	0	0	0	0	1	1	1	1	0	0	0	0	0	0	0	0	1	0	0	0	0	0	0	0	0	0	0	0	0	0	0	0	0	0
A0A0H3NB88	A0A0H3NB88	7	7	7	tr|A0A0H3NB88|A0A0H3NB88_SALTS Putrescine-binding periplasmic protein OS=Salmonella typhimurium (strain SL1344) OX=216597 GN=potF PE=3 SV=1	1	7	7	7	7	6	2	1	1	1	0	0	0	0	0	0	0	0	0	0	0	0	0	0	0	0	1	1	1	0	0	0	0	0	0	0	0	0	0	0	0	0	0	0
A0A0H3NB92	A0A0H3NB92	13	13	13	tr|A0A0H3NB92|A0A0H3NB92_SALTS Cyclopropane-fatty-acyl-phospholipid synthase OS=Salmonella typhimurium (strain SL1344) OX=216597 GN=cfa PE=4 SV=1	1	13	13	13	2	6	5	4	3	1	1	0	0	0	0	0	0	0	0	0	0	0	0	0	1	1	0	2	5	1	0	0	0	0	0	0	0	0	0	1	0	0	0	0
A0A0H3NB93	A0A0H3NB93	4	4	4	tr|A0A0H3NB93|A0A0H3NB93_SALTS 23S rRNA (uracil(747)-C(5))-methyltransferase RlmC OS=Salmonella typhimurium (strain SL1344) OX=216597 GN=rumB PE=3 SV=1	1	4	4	4	1	1	1	1	1	1	2	3	2	2	1	1	0	0	0	0	0	0	0	0	1	0	0	0	0	0	0	0	0	0	1	0	0	0	0	0	0	0	0	0
A0A0H3NBA3	A0A0H3NBA3	4	4	4	tr|A0A0H3NBA3|A0A0H3NBA3_SALTS UPF0145 protein YbjQ OS=Salmonella typhimurium (strain SL1344) OX=216597 GN=ybjQ PE=3 SV=1	1	4	4	4	0	1	3	3	3	2	2	2	1	0	0	0	0	1	1	0	0	0	0	0	0	0	1	0	4	1	0	0	0	0	0	0	0	0	0	0	0	0	0	0
A0A0H3NBA6	A0A0H3NBA6	6	6	6	tr|A0A0H3NBA6|A0A0H3NBA6_SALTS Hypothetical HlyD-family protein OS=Salmonella typhimurium (strain SL1344) OX=216597 GN=ydhJ PE=3 SV=1	1	6	6	6	0	0	0	0	0	0	0	0	0	0	0	0	0	0	0	0	0	0	0	0	3	0	0	0	0	0	0	0	0	0	0	0	0	0	0	0	0	0	0	0
A0A0H3NBA9	A0A0H3NBA9	5	5	5	tr|A0A0H3NBA9|A0A0H3NBA9_SALTS UPF0482 protein YnfB OS=Salmonella typhimurium (strain SL1344) OX=216597 GN=ynfB PE=3 SV=1	1	5	5	5	5	2	2	1	1	0	0	0	0	0	0	0	0	0	0	0	0	0	0	0	1	0	1	1	2	0	0	0	0	0	0	0	0	0	0	0	0	0	0	0
A0A0H3NBB0	A0A0H3NBB0	16	16	16	tr|A0A0H3NBB0|A0A0H3NBB0_SALTS Pyruvate dehydrogenase OS=Salmonella typhimurium (strain SL1344) OX=216597 GN=poxB PE=3 SV=1	1	16	16	16	0	0	3	14	13	11	5	4	2	1	1	0	0	0	0	0	0	0	0	0	0	4	0	0	4	4	4	6	4	4	3	2	1	0	0	0	0	0	0	0
A0A0H3NBB4	A0A0H3NBB4	6	6	6	tr|A0A0H3NBB4|A0A0H3NBB4_SALTS Uncharacterized protein OS=Salmonella typhimurium (strain SL1344) OX=216597 GN=ydfZ PE=4 SV=1	1	6	6	6	5	3	5	6	6	5	4	3	3	4	2	0	1	0	0	0	0	0	0	0	0	0	1	0	4	4	1	1	1	0	0	0	0	0	0	0	0	0	0	0
A0A0H3NBB8	A0A0H3NBB8	6	6	6	tr|A0A0H3NBB8|A0A0H3NBB8_SALTS Uncharacterized protein OS=Salmonella typhimurium (strain SL1344) OX=216597 GN=ydeJ PE=3 SV=1	1	6	6	6	4	4	1	1	1	1	1	0	0	0	0	0	0	0	0	0	0	0	0	0	0	0	2	1	0	1	1	0	0	0	0	0	0	0	0	0	0	0	0	0
A0A0H3NBB9	A0A0H3NBB9	12	12	12	tr|A0A0H3NBB9|A0A0H3NBB9_SALTS Hypothetical virK protein OS=Salmonella typhimurium (strain SL1344) OX=216597 GN=ybjX PE=4 SV=1	1	12	12	12	0	0	0	0	1	1	3	6	6	5	4	4	3	7	4	2	1	2	2	1	6	0	0	0	0	0	0	0	2	3	4	3	2	3	3	3	1	1	1	2
A0A0H3NBC5	A0A0H3NBC5	10	10	10	tr|A0A0H3NBC5|A0A0H3NBC5_SALTS Hypothetical oxidoreductase OS=Salmonella typhimurium (strain SL1344) OX=216597 GN=yneI PE=4 SV=1	1	10	10	10	1	6	6	6	6	0	1	0	0	0	0	0	0	0	0	0	0	0	0	0	0	2	0	2	8	2	3	2	2	0	0	0	0	0	0	0	0	0	0	0
A0A0H3NBC6	A0A0H3NBC6	35	35	35	tr|A0A0H3NBC6|A0A0H3NBC6_SALTS ATP-dependent Clp protease ATP-binding subunit ClpA OS=Salmonella typhimurium (strain SL1344) OX=216597 GN=clpA PE=3 SV=1	1	35	35	35	14	22	20	20	19	15	14	10	10	9	9	4	10	6	7	3	2	10	4	3	18	6	7	6	15	9	9	8	5	3	3	3	3	3	3	2	2	1	2	6
A0A0H3NBC9	A0A0H3NBC9	24	24	24	tr|A0A0H3NBC9|A0A0H3NBC9_SALTS Hypothetical oxidoreductase OS=Salmonella typhimurium (strain SL1344) OX=216597 GN=ydgJ PE=4 SV=1	1	24	24	24	10	14	12	15	17	13	9	7	4	4	2	0	0	0	0	0	0	0	0	0	0	5	5	6	12	8	9	9	8	5	4	3	2	1	1	1	0	0	0	0
A0A0H3NBD2	A0A0H3NBD2	4	4	4	tr|A0A0H3NBD2|A0A0H3NBD2_SALTS Hypothetical transcriptional activator OS=Salmonella typhimurium (strain SL1344) OX=216597 GN=SL1344_0890 PE=4 SV=1	1	4	4	4	2	2	0	0	0	0	0	0	0	0	0	0	0	0	0	0	0	0	0	0	0	0	0	2	1	1	2	0	0	0	0	0	0	0	0	0	0	0	0	0
A0A0H3NBD5	A0A0H3NBD5	4	4	4	tr|A0A0H3NBD5|A0A0H3NBD5_SALTS Hydrogenase isoenzymes formation protein OS=Salmonella typhimurium (strain SL1344) OX=216597 GN=SL1344_1464 PE=4 SV=1	1	4	4	4	2	1	0	0	0	0	0	1	0	0	0	0	0	0	0	0	0	0	0	0	0	1	0	0	0	0	0	0	0	0	0	0	0	0	0	0	0	0	0	0
A0A0H3NBD6	A0A0H3NBD6	29	29	29	tr|A0A0H3NBD6|A0A0H3NBD6_SALTS Fumarate hydratase class II OS=Salmonella typhimurium (strain SL1344) OX=216597 GN=fumC PE=3 SV=1	1	29	29	29	0	3	17	24	22	17	12	11	10	7	3	1	2	1	0	0	0	0	0	0	0	2	0	2	21	11	10	8	6	3	2	0	0	0	0	0	0	0	0	0
A0A0H3NBD9	A0A0H3NBD9	10	10	10	tr|A0A0H3NBD9|A0A0H3NBD9_SALTS Hypothetical secreted hydrolase OS=Salmonella typhimurium (strain SL1344) OX=216597 GN=SL1344_1469 PE=4 SV=1	1	10	10	10	9	9	8	3	3	3	0	0	0	0	0	0	0	0	0	0	0	0	0	0	0	0	0	0	5	0	0	0	0	0	0	0	0	0	0	0	0	0	0	0
A0A0H3NBE0	A0A0H3NBE0	4	4	4	tr|A0A0H3NBE0|A0A0H3NBE0_SALTS Transport ATP-binding protein CydD OS=Salmonella typhimurium (strain SL1344) OX=216597 GN=cydD PE=4 SV=1	1	4	4	4	0	0	0	0	0	0	0	0	0	0	0	0	0	0	0	0	0	0	0	0	3	0	0	0	0	0	0	0	0	0	0	0	0	0	0	0	0	0	0	0
A0A0H3NBE1	A0A0H3NBE1	9	9	9	tr|A0A0H3NBE1|A0A0H3NBE1_SALTS Hypothetical two-component response regulator OS=Salmonella typhimurium (strain SL1344) OX=216597 GN=rstA PE=4 SV=1	1	9	9	9	8	7	5	4	3	1	0	0	2	0	0	0	0	0	0	0	0	0	0	0	2	3	2	2	4	0	0	0	0	0	0	0	0	0	0	0	0	0	0	0
A0A0H3NBE5	A0A0H3NBE5	8	8	8	tr|A0A0H3NBE5|A0A0H3NBE5_SALTS NAD(P) transhydrogenase subunit beta OS=Salmonella typhimurium (strain SL1344) OX=216597 GN=pntB PE=3 SV=1	1	8	8	8	0	0	0	0	0	0	0	0	0	0	1	1	1	1	1	0	1	2	1	0	6	0	0	0	0	0	0	0	0	0	0	0	0	0	1	1	0	0	0	1
A0A0H3NBE7	A0A0H3NBE7	2	2	2	tr|A0A0H3NBE7|A0A0H3NBE7_SALTS Plasmid stability protein OS=Salmonella typhimurium (strain SL1344) OX=216597 GN=SL1344_1479 PE=4 SV=1	1	2	2	2	1	2	1	0	0	0	0	0	0	0	0	0	0	0	0	0	0	0	0	0	0	0	0	0	0	0	0	0	0	0	0	0	0	0	0	0	0	0	0	0
A0A0H3NBE8	A0A0H3NBE8	18	18	18	tr|A0A0H3NBE8|A0A0H3NBE8_SALTS Uncharacterized protein OS=Salmonella typhimurium (strain SL1344) OX=216597 GN=ycaJ PE=4 SV=1	1	18	18	18	0	0	12	15	14	11	9	5	5	1	0	0	0	0	0	0	0	0	0	0	0	1	1	0	7	2	2	3	1	0	1	0	0	1	0	0	0	0	0	0
A0A0H3NBF2	A0A0H3NBF2	1	1	1	tr|A0A0H3NBF2|A0A0H3NBF2_SALTS Hypothetical LacI-family transcriptional regulator OS=Salmonella typhimurium (strain SL1344) OX=216597 GN=SL1344_1485 PE=4 SV=1	1	1	1	1	0	1	1	0	0	0	0	0	0	0	0	0	0	0	0	0	0	0	0	0	0	0	0	0	0	0	0	0	0	0	0	0	0	0	0	0	0	0	0	0
A0A0H3NBF5	A0A0H3NBF5	13	13	13	tr|A0A0H3NBF5|A0A0H3NBF5_SALTS Malto-oligosyltrehalose trehalohydrolase OS=Salmonella typhimurium (strain SL1344) OX=216597 GN=SL1344_1490 PE=3 SV=1	1	13	13	13	8	12	10	6	3	0	1	0	0	0	0	0	0	0	0	0	0	0	0	0	0	0	0	0	3	0	0	0	0	0	0	0	0	0	0	0	0	0	0	0
A0A0H3NBF9	A0A0H3NBF9	7	7	7	tr|A0A0H3NBF9|A0A0H3NBF9_SALTS 30S ribosomal protein S22 OS=Salmonella typhimurium (strain SL1344) OX=216597 GN=rpsV PE=4 SV=1	1	7	7	7	2	2	1	1	3	3	3	3	4	5	6	4	7	3	6	6	6	4	4	3	4	0	0	0	2	0	0	0	0	0	2	3	3	4	4	4	3	3	2	5
A0A0H3NBG2	A0A0H3NBG2	2	2	2	tr|A0A0H3NBG2|A0A0H3NBG2_SALTS Tat proofreading chaperone DmsD OS=Salmonella typhimurium (strain SL1344) OX=216597 GN=ynfI PE=3 SV=1	1	2	2	2	1	1	1	0	0	0	0	0	0	0	0	0	0	0	0	0	0	0	0	0	0	0	0	0	1	0	0	0	0	0	0	0	0	0	0	0	0	0	0	0
A0A0H3NBG3	A0A0H3NBG3	68	68	62	tr|A0A0H3NBG3|A0A0H3NBG3_SALTS Formate acetyltransferase 1 OS=Salmonella typhimurium (strain SL1344) OX=216597 GN=pflB PE=4 SV=1	1	68	68	62	4	36	56	61	61	59	57	54	51	38	31	11	17	7	7	4	5	5	2	1	7	17	2	18	56	40	37	35	36	31	18	15	9	9	7	6	5	2	2	6
A0A0H3NBG4	A0A0H3NBG4	16	13	13	tr|A0A0H3NBG4|A0A0H3NBG4_SALTS Formate dehydrogenase N (Nitrate-inducible, alpha subunit) OS=Salmonella typhimurium (strain SL1344) OX=216597 GN=fdnG PE=3 SV=1	1	16	13	13	1	2	5	5	5	3	3	2	2	1	0	0	0	0	0	0	0	0	0	1	9	0	0	0	0	0	0	0	0	2	2	2	1	0	0	0	0	0	0	0
A0A0H3NBH6	A0A0H3NBH6	5	5	5	tr|A0A0H3NBH6|A0A0H3NBH6_SALTS Hypothetical acetyltransferase OS=Salmonella typhimurium (strain SL1344) OX=216597 GN=yncA PE=4 SV=1	1	5	5	5	3	3	2	1	1	1	1	0	0	0	0	0	0	0	0	0	0	0	0	0	0	0	1	2	0	0	0	0	0	0	0	0	0	0	0	0	0	0	0	0
A0A0H3NBH9	A0A0H3NBH9	12	12	12	tr|A0A0H3NBH9|A0A0H3NBH9_SALTS Virulence protein OS=Salmonella typhimurium (strain SL1344) OX=216597 GN=srfC PE=4 SV=1	1	12	12	12	1	6	7	5	4	3	3	0	1	0	1	0	1	0	0	0	0	0	0	0	4	1	0	0	5	2	0	0	0	1	1	0	1	0	0	0	0	0	0	0
A0A0H3NBI7	A0A0H3NBI7	2	2	2	tr|A0A0H3NBI7|A0A0H3NBI7_SALTS Hypothetical exported protein OS=Salmonella typhimurium (strain SL1344) OX=216597 GN=ynfD PE=4 SV=1	1	2	2	2	2	2	2	1	1	1	1	0	0	0	0	0	0	0	0	0	0	0	0	0	0	1	1	1	2	1	1	1	1	1	1	1	0	0	0	0	0	0	0	0
A0A0H3NBI9	A0A0H3NBI9	19	19	19	tr|A0A0H3NBI9|A0A0H3NBI9_SALTS Starvation sensing protein RspA OS=Salmonella typhimurium (strain SL1344) OX=216597 GN=rspA PE=3 SV=1	1	19	19	19	1	1	3	5	16	16	19	17	16	10	6	1	1	1	1	1	1	0	0	0	0	0	0	0	0	0	3	4	6	6	5	2	2	2	1	1	1	1	1	1
A0A0H3NBJ3	A0A0H3NBJ3	12	12	12	tr|A0A0H3NBJ3|A0A0H3NBJ3_SALTS Hypothetical oxidoreductase OS=Salmonella typhimurium (strain SL1344) OX=216597 GN=ydfG PE=3 SV=1	1	12	12	12	12	12	11	11	11	8	8	3	1	0	1	0	0	0	0	0	0	0	0	0	4	6	5	7	11	6	5	5	4	3	3	2	2	0	0	0	0	0	0	0
A0A0H3NBJ4	A0A0H3NBJ4	3	3	3	tr|A0A0H3NBJ4|A0A0H3NBJ4_SALTS Uncharacterized protein OS=Salmonella typhimurium (strain SL1344) OX=216597 GN=SL1344_1545 PE=4 SV=1	1	3	3	3	0	0	0	0	0	0	0	2	2	2	0	0	0	0	0	0	0	0	0	0	0	0	0	0	0	0	0	0	1	1	1	0	0	0	0	0	0	0	0	0
A0A0H3NBJ7	A0A0H3NBJ7	19	19	19	tr|A0A0H3NBJ7|A0A0H3NBJ7_SALTS 3-phosphoshikimate 1-carboxyvinyltransferase OS=Salmonella typhimurium (strain SL1344) OX=216597 GN=aroA PE=3 SV=1	1	19	19	19	16	15	8	8	6	3	4	2	1	1	2	0	0	0	0	0	0	0	0	0	0	1	3	4	10	2	2	0	0	0	0	0	0	0	0	0	0	0	0	0
A0A0H3NBK4	A0A0H3NBK4	8	8	8	tr|A0A0H3NBK4|A0A0H3NBK4_SALTS Hypothetical LysR-family transcriptional regulatory protein OS=Salmonella typhimurium (strain SL1344) OX=216597 GN=ydcI PE=4 SV=1	1	8	8	8	2	4	4	4	1	1	1	1	0	0	0	0	0	0	0	0	0	0	0	0	1	1	1	1	2	1	1	0	0	0	0	0	0	0	0	0	0	1	1	1
A0A0H3NBK8	A0A0H3NBK8	16	16	16	tr|A0A0H3NBK8|A0A0H3NBK8_SALTS 3-deoxy-manno-octulosonate cytidylyltransferase OS=Salmonella typhimurium (strain SL1344) OX=216597 GN=kdsB PE=3 SV=1	1	16	16	16	14	14	12	9	9	6	5	2	0	0	1	0	0	0	0	0	0	0	0	0	0	1	1	5	14	1	0	0	0	0	0	0	0	0	0	0	0	0	0	0
A0A0H3NBL1	A0A0H3NBL1	1	1	1	tr|A0A0H3NBL1|A0A0H3NBL1_SALTS Hypothetical ATP/GTP-binding protein OS=Salmonella typhimurium (strain SL1344) OX=216597 GN=SL1344_1461 PE=4 SV=1	1	1	1	1	1	1	0	0	0	0	0	0	0	0	0	0	0	0	0	0	0	0	0	0	0	0	0	0	0	0	0	0	0	0	0	0	0	0	0	0	0	0	0	0
A0A0H3NBL2	A0A0H3NBL2	9	9	9	tr|A0A0H3NBL2|A0A0H3NBL2_SALTS Chromosome partition protein MukE OS=Salmonella typhimurium (strain SL1344) OX=216597 GN=mukE PE=3 SV=1	1	9	9	9	2	3	4	7	9	9	9	7	5	4	1	1	1	0	0	0	0	0	0	0	0	1	0	0	3	3	3	2	3	3	2	0	0	0	0	0	0	0	0	0
A0A0H3NBL7	A0A0H3NBL7	35	35	35	tr|A0A0H3NBL7|A0A0H3NBL7_SALTS Aminotransferase OS=Salmonella typhimurium (strain SL1344) OX=216597 GN=aspC PE=3 SV=1	1	35	35	35	29	33	31	30	30	29	26	24	22	19	17	5	10	1	1	0	0	1	1	0	0	12	11	18	31	18	16	12	12	8	7	6	2	4	2	2	3	0	0	0
A0A0H3NBL8	A0A0H3NBL8	14	14	14	tr|A0A0H3NBL8|A0A0H3NBL8_SALTS Hypothetical alcohol dehydrogenase OS=Salmonella typhimurium (strain SL1344) OX=216597 GN=SL1344_1471 PE=4 SV=1	1	14	14	14	12	12	10	6	3	1	3	1	1	1	0	0	0	0	0	0	0	0	0	0	1	0	2	2	4	0	0	0	0	0	0	0	0	0	0	0	0	0	0	0
A0A0H3NBL9	A0A0H3NBL9	14	14	14	tr|A0A0H3NBL9|A0A0H3NBL9_SALTS Uncharacterized protein OS=Salmonella typhimurium (strain SL1344) OX=216597 GN=ydcF PE=4 SV=1	1	14	14	14	12	9	9	3	4	3	4	6	3	3	3	0	0	0	0	0	0	0	0	0	3	3	6	6	6	2	1	1	4	5	4	4	3	4	2	2	2	0	0	0
A0A0H3NBM3	A0A0H3NBM3	3	3	3	tr|A0A0H3NBM3|A0A0H3NBM3_SALTS Hypothetical regulatory protein OS=Salmonella typhimurium (strain SL1344) OX=216597 GN=SL1344_1476 PE=4 SV=1	1	3	3	3	2	2	1	0	0	0	0	0	0	0	0	0	0	0	0	0	0	0	0	0	0	0	0	0	0	0	0	0	0	0	0	0	0	0	0	0	0	0	0	0
A0A0H3NBN5	A0A0H3NBN5	7	7	7	tr|A0A0H3NBN5|A0A0H3NBN5_SALTS Predicted bacteriophage protein OS=Salmonella typhimurium (strain SL1344) OX=216597 GN=SL1344_0956 PE=4 SV=1	1	7	7	7	7	7	7	5	5	3	4	1	0	0	0	0	0	0	0	0	0	0	0	0	0	0	1	1	5	0	0	0	0	0	0	0	0	0	0	0	0	0	0	0
A0A0H3NBN6	A0A0H3NBN6	4	4	4	tr|A0A0H3NBN6|A0A0H3NBN6_SALTS ATP-dependent RNA helicase DbpA OS=Salmonella typhimurium (strain SL1344) OX=216597 GN=dbpA PE=3 SV=1	1	4	4	4	1	3	0	0	0	0	0	0	0	0	0	0	0	0	0	0	0	0	0	0	1	0	1	1	1	0	0	0	0	0	0	0	0	1	0	0	0	0	0	0
A0A0H3NBN9	A0A0H3NBN9	3	3	3	tr|A0A0H3NBN9|A0A0H3NBN9_SALTS Acid stress chaperone HdeB OS=Salmonella typhimurium (strain SL1344) OX=216597 GN=hdeB PE=3 SV=1	1	3	3	3	3	3	2	0	0	0	0	0	0	0	0	0	0	0	0	0	0	0	0	0	0	0	1	1	0	0	0	0	0	0	0	0	0	0	0	0	0	0	0	0
A0A0H3NBP1	A0A0H3NBP1	4	4	4	tr|A0A0H3NBP1|A0A0H3NBP1_SALTS Fumarate and nitrate reduction regulatory protein OS=Salmonella typhimurium (strain SL1344) OX=216597 GN=fnr PE=4 SV=1	1	4	4	4	3	2	2	0	0	0	0	0	0	0	0	0	0	1	1	0	0	1	0	0	2	2	1	1	0	1	0	0	0	0	0	0	1	0	0	0	0	0	1	0
A0A0H3NBP3	A0A0H3NBP3	16	16	16	tr|A0A0H3NBP3|A0A0H3NBP3_SALTS Alcohol dehydrogenase OS=Salmonella typhimurium (strain SL1344) OX=216597 GN=adhP PE=3 SV=1	1	16	16	16	6	10	13	13	14	11	8	7	7	7	6	2	1	0	0	0	0	0	0	0	0	5	6	9	14	11	11	9	8	6	4	3	4	2	3	1	1	0	0	1
A0A0H3NBP7	A0A0H3NBP7	7	7	7	tr|A0A0H3NBP7|A0A0H3NBP7_SALTS Uncharacterized protein OS=Salmonella typhimurium (strain SL1344) OX=216597 GN=SL1344_1596 PE=4 SV=1	1	7	7	7	6	4	3	2	1	0	0	0	0	0	0	0	0	0	0	0	0	0	0	0	0	0	3	3	3	1	0	0	0	0	0	0	0	0	0	0	0	0	0	0
A0A0H3NBQ0;A0A0H3NHV2;A0A0H3NGG2	A0A0H3NBQ0	18;2;2	18;2;2	16;1;0	tr|A0A0H3NBQ0|A0A0H3NBQ0_SALTS Outer membrane protein OS=Salmonella typhimurium (strain SL1344) OX=216597 GN=ompD PE=3 SV=1	3	18	18	16	1	2	4	4	8	9	9	9	9	9	9	2	9	1	7	5	6	9	9	1	12	1	0	0	0	0	2	5	5	2	1	3	4	1	1	0	0	0	0	7
A0A0H3NBQ1	A0A0H3NBQ1	15	15	15	tr|A0A0H3NBQ1|A0A0H3NBQ1_SALTS Uncharacterized protein OS=Salmonella typhimurium (strain SL1344) OX=216597 GN=SL1344_1602 PE=4 SV=1	1	15	15	15	5	10	9	10	7	3	1	2	1	0	0	0	0	0	0	0	0	0	0	0	1	3	0	5	8	3	1	0	0	0	0	0	0	0	0	0	0	0	0	0
A0A0H3NBQ6	A0A0H3NBQ6	1	1	1	tr|A0A0H3NBQ6|A0A0H3NBQ6_SALTS Hypothetical transcriptional regulator OS=Salmonella typhimurium (strain SL1344) OX=216597 GN=SL1344_1607 PE=4 SV=1	1	1	1	1	0	0	0	0	0	0	0	0	1	1	1	0	0	0	0	0	0	0	0	0	0	0	0	0	0	0	0	0	0	0	0	0	0	0	0	0	0	0	0	0
A0A0H3NBR0	A0A0H3NBR0	4	4	4	tr|A0A0H3NBR0|A0A0H3NBR0_SALTS N-hydroxyarylamine O-acetyltransferase OS=Salmonella typhimurium (strain SL1344) OX=216597 GN=nhoA PE=3 SV=1	1	4	4	4	1	1	1	0	0	0	0	0	1	0	0	0	0	0	0	0	0	0	0	0	0	0	0	1	3	1	0	0	0	0	0	0	0	0	0	0	0	0	0	0
A0A0H3NBR4	A0A0H3NBR4	13	13	13	tr|A0A0H3NBR4|A0A0H3NBR4_SALTS Thiol peroxidase OS=Salmonella typhimurium (strain SL1344) OX=216597 GN=tpx PE=3 SV=1	1	13	13	13	11	10	9	9	8	8	7	7	7	7	7	4	4	1	2	2	1	0	0	0	1	6	9	8	10	7	7	6	6	5	5	5	4	4	3	3	3	1	1	2
A0A0H3NBS3	A0A0H3NBS3	3	3	3	tr|A0A0H3NBS3|A0A0H3NBS3_SALTS Uncharacterized protein OS=Salmonella typhimurium (strain SL1344) OX=216597 GN=ydcY PE=4 SV=1	1	3	3	3	3	3	2	1	1	0	0	0	0	0	0	0	0	0	0	0	0	0	0	0	0	0	0	0	1	0	0	0	0	0	0	0	0	0	0	0	0	0	0	0
A0A0H3NBS4	A0A0H3NBS4	5	5	5	tr|A0A0H3NBS4|A0A0H3NBS4_SALTS Peptide transport periplasmic protein SapA OS=Salmonella typhimurium (strain SL1344) OX=216597 GN=sapA PE=4 SV=1	1	5	5	5	3	2	3	0	0	0	0	0	0	0	0	0	0	0	0	0	0	0	0	0	0	0	0	0	1	0	0	0	0	0	0	0	0	0	0	0	0	0	0	0
A0A0H3NBS6	A0A0H3NBS6	4	4	4	tr|A0A0H3NBS6|A0A0H3NBS6_SALTS Hypothetical secreted protein OS=Salmonella typhimurium (strain SL1344) OX=216597 GN=pqiB PE=4 SV=1	1	4	4	4	0	0	0	0	0	0	0	0	0	0	0	0	0	0	0	0	0	0	0	0	3	0	0	0	0	0	0	0	0	0	0	0	0	0	0	0	0	0	0	0
A0A0H3NBS8	A0A0H3NBS8	20	20	20	tr|A0A0H3NBS8|A0A0H3NBS8_SALTS Gamma-aminobutyraldehyde dehydrogenase OS=Salmonella typhimurium (strain SL1344) OX=216597 GN=ydcW PE=3 SV=1	1	20	20	20	0	2	14	16	19	12	10	9	5	3	3	2	0	0	0	1	0	0	0	0	1	3	0	1	8	6	6	5	5	4	3	0	0	0	0	0	1	0	0	0
A0A0H3NBT1	A0A0H3NBT1	7	7	7	tr|A0A0H3NBT1|A0A0H3NBT1_SALTS Macrodomain Ter protein OS=Salmonella typhimurium (strain SL1344) OX=216597 GN=ycbG PE=3 SV=1	1	7	7	7	1	1	1	2	4	5	5	5	4	4	4	0	1	0	0	0	0	0	0	0	1	0	0	0	0	0	1	1	1	1	1	1	1	1	1	1	1	0	0	0
A0A0H3NBT7	A0A0H3NBT7	3	3	3	tr|A0A0H3NBT7|A0A0H3NBT7_SALTS Hypothetical lipoprotein OS=Salmonella typhimurium (strain SL1344) OX=216597 GN=SL1344_1537 PE=4 SV=1	1	3	3	3	0	0	0	0	0	0	0	0	0	0	1	1	1	0	1	1	1	0	0	0	1	0	0	0	0	0	0	0	0	0	1	0	0	0	0	0	0	0	0	0
A0A0H3NBT9	A0A0H3NBT9	1	1	1	tr|A0A0H3NBT9|A0A0H3NBT9_SALTS Osmotically inducible lipoprotein B OS=Salmonella typhimurium (strain SL1344) OX=216597 GN=osmB PE=4 SV=1	1	1	1	1	0	0	0	0	0	0	0	0	0	0	0	0	0	0	0	0	0	0	0	0	0	0	0	0	0	0	0	0	0	0	0	0	0	0	0	0	0	0	0	0
A0A0H3NBU1	A0A0H3NBU1	3	3	3	tr|A0A0H3NBU1|A0A0H3NBU1_SALTS Heat shock protein HspQ OS=Salmonella typhimurium (strain SL1344) OX=216597 GN=yccV PE=3 SV=1	1	3	3	3	3	2	1	0	0	0	0	0	0	0	0	0	0	0	0	0	0	0	0	0	0	0	1	0	2	0	0	0	0	0	0	0	0	0	0	0	0	0	0	0
A0A0H3NBU2	A0A0H3NBU2	7	7	7	tr|A0A0H3NBU2|A0A0H3NBU2_SALTS Uncharacterized protein OS=Salmonella typhimurium (strain SL1344) OX=216597 GN=SL1344_1542 PE=3 SV=1	1	7	7	7	0	0	0	0	4	4	1	0	0	0	0	0	0	0	0	0	0	0	0	0	0	0	0	0	0	0	0	1	1	0	0	0	0	0	0	0	0	0	0	0
A0A0H3NBU6	A0A0H3NBU6	6	6	6	tr|A0A0H3NBU6|A0A0H3NBU6_SALTS Sulfurtransferase OS=Salmonella typhimurium (strain SL1344) OX=216597 GN=yccK PE=3 SV=1	1	6	6	6	3	3	3	1	1	0	0	0	0	0	0	0	0	0	0	0	0	0	0	0	0	0	1	1	0	0	0	0	0	0	0	0	0	0	1	1	0	1	1	1
A0A0H3NBV0	A0A0H3NBV0	7	7	7	tr|A0A0H3NBV0|A0A0H3NBV0_SALTS Uncharacterized protein OS=Salmonella typhimurium (strain SL1344) OX=216597 GN=yciN PE=4 SV=1	1	7	7	7	7	7	6	4	4	3	3	1	1	1	1	0	0	0	0	0	0	0	0	0	0	2	5	5	6	3	2	1	1	1	1	1	0	0	0	0	0	0	0	0
A0A0H3NBV1	A0A0H3NBV1	3	3	3	tr|A0A0H3NBV1|A0A0H3NBV1_SALTS Chaperone protein OS=Salmonella typhimurium (strain SL1344) OX=216597 GN=pipC PE=3 SV=1	1	3	3	3	2	3	2	2	1	0	0	0	0	0	0	0	0	0	0	0	0	0	0	0	0	2	1	1	3	1	1	1	0	0	0	0	0	0	0	0	0	0	0	0
A0A0H3NBV2	A0A0H3NBV2	25	25	25	tr|A0A0H3NBV2|A0A0H3NBV2_SALTS Glucans biosynthesis protein D OS=Salmonella typhimurium (strain SL1344) OX=216597 GN=ydcG PE=3 SV=1	1	25	25	25	4	19	20	18	18	16	13	9	6	3	4	0	0	0	0	0	0	0	0	0	0	4	1	7	19	10	7	6	3	0	0	0	0	0	0	0	0	0	0	0
A0A0H3NBV6	A0A0H3NBV6	10	10	10	tr|A0A0H3NBV6|A0A0H3NBV6_SALTS Uncharacterized protein OS=Salmonella typhimurium (strain SL1344) OX=216597 GN=yciO PE=3 SV=1	1	10	10	10	10	10	7	5	4	3	6	4	6	5	4	0	2	0	0	0	0	0	0	0	3	1	2	2	8	1	1	1	2	2	1	1	1	0	0	0	0	0	0	1
A0A0H3NBV8	A0A0H3NBV8	16	16	16	tr|A0A0H3NBV8|A0A0H3NBV8_SALTS S-(hydroxymethyl)glutathione dehydrogenase OS=Salmonella typhimurium (strain SL1344) OX=216597 GN=adhC PE=3 SV=1	1	16	16	16	11	13	14	13	11	9	5	6	4	4	4	0	0	0	0	0	0	0	0	0	0	2	2	4	10	3	3	3	1	1	0	0	0	1	1	1	0	0	0	0
A0A0H3NBW0	A0A0H3NBW0	9	9	9	tr|A0A0H3NBW0|A0A0H3NBW0_SALTS Homoprotocatechuate degradative operon repressor OS=Salmonella typhimurium (strain SL1344) OX=216597 GN=hpaR PE=4 SV=1	1	9	9	9	5	6	5	1	0	0	0	0	0	0	0	0	0	0	0	0	0	0	0	0	0	0	3	3	3	0	0	0	0	0	0	0	0	0	0	0	0	0	0	0
A0A0H3NBW1	A0A0H3NBW1	11	11	11	tr|A0A0H3NBW1|A0A0H3NBW1_SALTS Tryptophan synthase beta chain OS=Salmonella typhimurium (strain SL1344) OX=216597 GN=trpB PE=3 SV=1	1	11	11	11	4	8	8	6	6	3	1	1	1	0	0	0	0	0	0	0	0	0	0	0	1	3	2	4	4	2	2	1	0	0	0	0	0	0	0	0	0	0	0	0
A0A0H3NBW6	A0A0H3NBW6	7	7	7	tr|A0A0H3NBW6|A0A0H3NBW6_SALTS Catalase OS=Salmonella typhimurium (strain SL1344) OX=216597 GN=katN PE=4 SV=1	1	7	7	7	0	0	0	5	4	4	3	4	1	0	0	0	0	0	0	0	0	0	0	0	0	0	0	0	2	0	0	0	0	0	0	0	0	0	0	0	0	0	0	0
A0A0H3NBX1	A0A0H3NBX1	5	5	5	tr|A0A0H3NBX1|A0A0H3NBX1_SALTS Hypothetical acyl-coA hydrolase OS=Salmonella typhimurium (strain SL1344) OX=216597 GN=yciA PE=4 SV=1	1	5	5	5	3	4	4	2	1	0	0	0	0	0	0	0	0	0	0	0	0	0	0	0	0	0	1	1	1	0	0	0	0	0	0	0	0	0	0	0	0	0	0	0
A0A0H3NBX3	A0A0H3NBX3	8	8	8	tr|A0A0H3NBX3|A0A0H3NBX3_SALTS FMN-dependent NADH-azoreductase OS=Salmonella typhimurium (strain SL1344) OX=216597 GN=acpD PE=3 SV=1	1	8	8	8	8	6	5	4	2	0	0	0	0	0	0	0	0	0	0	0	0	0	0	0	0	0	1	1	4	1	0	0	0	0	0	0	0	0	0	0	0	0	0	0
A0A0H3NBX5	A0A0H3NBX5	2	2	2	tr|A0A0H3NBX5|A0A0H3NBX5_SALTS Secreted protein, suppressor for copper-sensitivity C OS=Salmonella typhimurium (strain SL1344) OX=216597 GN=scsC PE=4 SV=1	1	2	2	2	2	0	0	0	0	0	0	0	0	0	0	0	0	0	0	0	0	0	0	0	0	0	0	0	0	0	0	0	0	0	0	0	0	0	0	0	0	0	0	0
A0A0H3NBX8	A0A0H3NBX8	17	17	17	tr|A0A0H3NBX8|A0A0H3NBX8_SALTS D-lactate dehydrogenase OS=Salmonella typhimurium (strain SL1344) OX=216597 GN=ldhA PE=3 SV=1	1	17	17	17	1	11	14	14	15	13	9	7	6	3	2	1	1	0	1	0	0	0	0	0	0	3	0	2	14	7	5	6	4	4	3	4	1	1	0	0	0	0	0	0
A0A0H3NBY2	A0A0H3NBY2	47	47	47	tr|A0A0H3NBY2|A0A0H3NBY2_SALTS Periplasmic oligopeptide-binding protein (OppA) OS=Salmonella typhimurium (strain SL1344) OX=216597 GN=oppA PE=4 SV=1	1	47	47	47	38	39	39	37	35	31	25	23	18	16	17	8	10	2	1	1	1	0	0	0	0	7	19	23	34	20	14	12	13	7	9	6	4	7	7	4	4	0	1	0
A0A0H3NBY3	A0A0H3NBY3	15	15	15	tr|A0A0H3NBY3|A0A0H3NBY3_SALTS Uncharacterized protein OS=Salmonella typhimurium (strain SL1344) OX=216597 GN=ynaF PE=4 SV=1	1	15	15	15	15	15	14	13	10	11	8	5	5	3	2	1	1	1	1	1	0	1	0	0	1	7	8	9	12	7	7	6	5	5	5	1	1	0	0	0	0	1	1	1
A0A0H3NBY6	A0A0H3NBY6	6	6	6	tr|A0A0H3NBY6|A0A0H3NBY6_SALTS PhoH protein (Phosphate starvation-inducible protein PsiH) OS=Salmonella typhimurium (strain SL1344) OX=216597 GN=phoH PE=4 SV=1	1	6	6	6	4	3	3	2	4	3	5	3	2	2	2	1	1	1	2	0	0	0	0	0	0	1	1	1	2	1	1	1	1	1	1	1	1	1	1	0	0	0	0	0
A0A0H3NBY9	A0A0H3NBY9	24	24	23	sp|A0A0H3NBY9|HNS_SALTS DNA-binding protein H-NS OS=Salmonella typhimurium (strain SL1344) OX=216597 GN=hns PE=1 SV=1	1	24	24	23	13	13	12	13	13	12	14	13	17	17	18	11	15	11	11	7	4	7	7	2	3	9	8	10	12	10	11	11	13	13	12	9	10	8	9	8	8	5	5	7
A0A0H3NBZ1	A0A0H3NBZ1	2	2	2	tr|A0A0H3NBZ1|A0A0H3NBZ1_SALTS Hypothetical secreted protein OS=Salmonella typhimurium (strain SL1344) OX=216597 GN=SL1344_1069 PE=4 SV=1	1	2	2	2	0	0	0	0	0	0	0	0	0	0	0	0	0	0	1	1	0	0	0	0	1	0	0	0	0	0	0	0	0	0	0	0	0	0	0	0	0	0	0	0
A0A0H3NBZ4	A0A0H3NBZ4	16	16	16	tr|A0A0H3NBZ4|A0A0H3NBZ4_SALTS Formyltetrahydrofolate deformylase OS=Salmonella typhimurium (strain SL1344) OX=216597 GN=purU PE=3 SV=1	1	16	16	16	0	10	13	14	13	10	7	5	1	1	1	0	0	0	0	0	0	0	0	0	0	4	0	4	15	8	4	5	2	1	0	0	0	0	0	0	0	0	0	0
A0A0H3NBZ6	A0A0H3NBZ6	7	7	7	tr|A0A0H3NBZ6|A0A0H3NBZ6_SALTS Uncharacterized protein OS=Salmonella typhimurium (strain SL1344) OX=216597 GN=ycdY PE=4 SV=1	1	7	7	7	7	6	4	3	2	1	0	0	0	0	0	0	0	0	0	0	0	0	0	0	2	1	1	1	3	1	0	0	1	0	0	0	1	1	1	1	1	1	0	0
A0A0H3NC01	A0A0H3NC01	25	25	19	tr|A0A0H3NC01|A0A0H3NC01_SALTS Respiratory nitrate reductase 1 alpha chain OS=Salmonella typhimurium (strain SL1344) OX=216597 GN=narG PE=3 SV=1	1	25	25	19	0	0	1	6	7	6	10	6	4	2	1	1	1	1	2	1	0	0	0	0	14	0	0	0	0	0	0	0	0	0	0	0	0	0	0	0	0	1	1	0
A0A0H3NC04	A0A0H3NC04	10	10	10	tr|A0A0H3NC04|A0A0H3NC04_SALTS O-acetyl-ADP-ribose deacetylase OS=Salmonella typhimurium (strain SL1344) OX=216597 GN=ymdB PE=3 SV=1	1	10	10	10	10	9	8	6	4	1	1	1	1	1	1	0	0	0	0	0	0	0	0	0	0	1	2	1	5	0	0	0	0	0	0	0	0	0	0	0	0	0	0	0
A0A0H3NC05	A0A0H3NC05	5	5	5	tr|A0A0H3NC05|A0A0H3NC05_SALTS Uncharacterized protein OS=Salmonella typhimurium (strain SL1344) OX=216597 GN=ychN PE=4 SV=1	1	5	5	5	3	3	3	3	3	1	0	0	0	0	0	0	0	0	0	0	0	0	0	0	0	1	3	3	5	4	2	1	1	0	0	0	0	0	0	0	0	0	0	0
A0A0H3NC08	A0A0H3NC08	25	25	25	tr|A0A0H3NC08|A0A0H3NC08_SALTS Periplasmic murein peptide-binding protein MppA OS=Salmonella typhimurium (strain SL1344) OX=216597 GN=mppA PE=4 SV=1	1	25	25	25	19	22	21	12	11	8	5	3	3	3	1	0	0	0	0	0	0	0	0	0	0	1	3	5	13	5	3	1	2	2	2	2	1	1	0	0	0	0	0	0
A0A0H3NC14	A0A0H3NC14	10	10	10	tr|A0A0H3NC14|A0A0H3NC14_SALTS Protein YceI OS=Salmonella typhimurium (strain SL1344) OX=216597 GN=yceI PE=3 SV=1	1	10	10	10	7	8	7	4	2	2	2	0	0	0	0	0	0	0	0	0	0	0	0	0	0	2	6	6	7	3	1	1	0	0	0	0	0	0	0	0	0	0	0	0
A0A0H3NC15	A0A0H3NC15	10	10	10	tr|A0A0H3NC15|A0A0H3NC15_SALTS 4-diphosphocytidyl-2-C-methyl-D-erythritol kinase OS=Salmonella typhimurium (strain SL1344) OX=216597 GN=ipk PE=3 SV=1	1	10	10	10	7	8	4	2	1	0	0	0	0	0	0	0	0	0	0	0	0	0	0	0	0	3	7	5	5	2	0	0	0	0	0	0	0	0	0	0	0	0	0	0
A0A0H3NC18	A0A0H3NC18	2	2	2	tr|A0A0H3NC18|A0A0H3NC18_SALTS Damage-inducible protein OS=Salmonella typhimurium (strain SL1344) OX=216597 GN=dinI PE=4 SV=1	1	2	2	2	2	0	0	0	0	0	0	0	0	0	0	0	0	0	0	0	0	0	0	0	0	0	0	0	0	0	0	0	0	0	0	0	0	0	0	0	0	0	0	0
A0A0H3NC19	A0A0H3NC19	21	21	21	tr|A0A0H3NC19|A0A0H3NC19_SALTS Ribosome-binding ATPase YchF OS=Salmonella typhimurium (strain SL1344) OX=216597 GN=ychF PE=3 SV=1	1	21	21	21	20	21	18	18	18	15	13	11	9	8	5	0	2	0	0	0	0	2	0	0	7	5	8	9	17	3	2	4	6	5	4	3	3	5	4	3	2	1	1	4
A0A0H3NC23	A0A0H3NC23	3	3	3	tr|A0A0H3NC23|A0A0H3NC23_SALTS Bacteriophage shock protein B OS=Salmonella typhimurium (strain SL1344) OX=216597 GN=pspB PE=4 SV=1	1	3	3	3	0	0	0	0	0	0	0	0	0	0	0	0	0	0	0	0	0	3	2	0	2	0	0	0	0	0	0	0	0	0	0	0	0	0	0	0	0	1	1	2
A0A0H3NC27	A0A0H3NC27	4	4	4	tr|A0A0H3NC27|A0A0H3NC27_SALTS Negative regulator of flagellin synthesis (Anti-sigma factor) OS=Salmonella typhimurium (strain SL1344) OX=216597 GN=flgM PE=4 SV=1	1	4	4	4	4	4	4	2	2	2	2	1	1	0	0	0	1	0	0	0	0	0	0	0	0	1	1	1	1	1	1	1	1	1	1	1	1	0	0	0	0	0	0	0
A0A0H3NC31	A0A0H3NC31	32	32	32	tr|A0A0H3NC31|A0A0H3NC31_SALTS Glutamate dehydrogenase OS=Salmonella typhimurium (strain SL1344) OX=216597 GN=SL1344_1723 PE=3 SV=1	1	32	32	32	27	29	28	28	25	27	26	24	23	19	18	8	11	3	3	3	1	6	2	1	20	14	18	23	27	21	18	19	17	15	12	9	7	5	6	6	6	5	4	3
A0A0H3NC32	A0A0H3NC32	16	16	16	tr|A0A0H3NC32|A0A0H3NC32_SALTS Flagellar hook protein FlgE OS=Salmonella typhimurium (strain SL1344) OX=216597 GN=flgE PE=3 SV=1	1	16	16	16	14	13	8	7	4	4	3	3	4	4	9	5	8	7	10	10	13	14	13	10	15	5	6	4	9	3	3	3	3	0	1	1	1	2	5	5	5	6	10	14
A0A0H3NC36	A0A0H3NC36	11	11	11	tr|A0A0H3NC36|A0A0H3NC36_SALTS Uncharacterized protein OS=Salmonella typhimurium (strain SL1344) OX=216597 GN=ldcA PE=4 SV=1	1	11	11	11	8	9	8	4	4	2	2	0	1	1	1	0	0	0	0	0	0	0	0	0	0	1	3	5	7	2	2	1	1	0	0	0	0	0	0	0	0	0	0	0
A0A0H3NC41	A0A0H3NC41	12	12	12	tr|A0A0H3NC41|A0A0H3NC41_SALTS Fatty acid metabolism regulator protein OS=Salmonella typhimurium (strain SL1344) OX=216597 GN=fadR PE=3 SV=1	1	12	12	12	8	9	10	7	6	4	4	4	3	4	3	1	3	0	2	0	1	0	0	0	5	2	0	3	8	2	0	0	0	0	0	0	0	0	0	0	0	0	0	0
A0A0H3NC43	A0A0H3NC43	12	12	12	tr|A0A0H3NC43|A0A0H3NC43_SALTS Orotidine 5-phosphate decarboxylase OS=Salmonella typhimurium (strain SL1344) OX=216597 GN=pyrF PE=3 SV=1	1	12	12	12	9	8	6	4	4	4	2	1	1	1	2	0	0	0	0	0	0	0	0	0	0	3	3	3	4	1	1	1	1	1	1	0	0	0	0	0	0	0	0	0
A0A0H3NC46	A0A0H3NC46	4	4	4	tr|A0A0H3NC46|A0A0H3NC46_SALTS Phosphate acyltransferase OS=Salmonella typhimurium (strain SL1344) OX=216597 GN=plsX PE=3 SV=1	1	4	4	4	0	0	0	0	0	1	3	2	2	1	2	0	0	0	0	0	0	1	0	0	1	0	0	0	0	0	0	0	0	0	0	0	0	0	0	0	0	0	0	0
A0A0H3NC48	A0A0H3NC48	40	40	40	tr|A0A0H3NC48|A0A0H3NC48_SALTS Aconitate hydratase OS=Salmonella typhimurium (strain SL1344) OX=216597 GN=acnA PE=3 SV=1	1	40	40	40	14	31	31	31	26	20	15	10	6	5	3	1	1	0	0	0	0	0	0	0	0	6	2	15	28	11	8	7	4	2	1	1	0	0	0	0	0	0	0	0
A0A0H3NC49	A0A0H3NC49	29	29	29	tr|A0A0H3NC49|A0A0H3NC49_SALTS Site-determining protein OS=Salmonella typhimurium (strain SL1344) OX=216597 GN=minD PE=3 SV=1	1	29	29	29	21	19	18	16	16	15	14	18	17	17	14	8	15	7	15	11	9	10	8	3	19	9	8	8	15	5	4	5	6	5	5	5	6	4	4	4	3	3	4	9
A0A0H3NC50	A0A0H3NC50	19	19	19	tr|A0A0H3NC50|A0A0H3NC50_SALTS 3-oxoacyl-[acyl-carrier-protein] synthase 2 OS=Salmonella typhimurium (strain SL1344) OX=216597 GN=fabF PE=3 SV=1	1	19	19	19	12	15	14	16	16	16	10	12	11	11	11	3	5	2	4	5	3	2	1	1	3	7	5	12	15	13	12	8	8	5	5	5	5	4	4	2	2	1	1	2
A0A0H3NC52	A0A0H3NC52	16	16	16	tr|A0A0H3NC52|A0A0H3NC52_SALTS Hypothetical oxidoreductase OS=Salmonella typhimurium (strain SL1344) OX=216597 GN=yciK PE=4 SV=1	1	16	16	16	13	16	13	9	9	7	6	4	2	2	2	0	1	0	0	0	0	0	0	0	1	5	5	5	10	5	5	5	3	1	1	2	0	0	0	0	0	0	0	0
A0A0H3NC54	A0A0H3NC54	7	7	7	tr|A0A0H3NC54|A0A0H3NC54_SALTS Uncharacterized protein OS=Salmonella typhimurium (strain SL1344) OX=216597 GN=yeaZ PE=4 SV=1	1	7	7	7	6	5	3	1	1	0	0	0	0	0	0	1	0	0	0	0	0	0	0	0	0	1	3	3	1	1	1	1	1	1	1	1	0	0	1	1	1	0	0	0
A0A0H3NC55	A0A0H3NC55	16	16	16	tr|A0A0H3NC55|A0A0H3NC55_SALTS Uncharacterized protein OS=Salmonella typhimurium (strain SL1344) OX=216597 GN=ycfH PE=4 SV=1	1	16	16	16	8	8	7	4	4	6	9	11	9	9	6	2	1	0	0	0	0	0	0	0	0	0	2	1	1	1	1	1	3	5	5	2	1	2	1	0	0	0	0	0
A0A0H3NC58	A0A0H3NC58	2	2	2	tr|A0A0H3NC58|A0A0H3NC58_SALTS Penicillin-binding protein activator LpoB OS=Salmonella typhimurium (strain SL1344) OX=216597 GN=ycfM PE=3 SV=1	1	2	2	2	0	0	0	0	0	0	0	0	0	0	0	0	0	0	0	0	0	0	0	0	2	0	0	0	0	0	0	0	0	0	0	0	0	0	0	0	0	0	0	0
A0A0H3NC59	A0A0H3NC59	5	5	5	tr|A0A0H3NC59|A0A0H3NC59_SALTS Uncharacterized Nudix hydrolase NudL OS=Salmonella typhimurium (strain SL1344) OX=216597 GN=yeaB PE=3 SV=1	1	5	5	5	0	3	1	2	1	0	3	2	2	2	2	0	0	0	0	0	0	0	0	0	0	0	0	0	1	0	0	1	1	1	1	1	1	1	1	1	1	1	0	0
A0A0H3NC61	A0A0H3NC61	1	1	1	tr|A0A0H3NC61|A0A0H3NC61_SALTS Phosphotransferase enzyme II, C component OS=Salmonella typhimurium (strain SL1344) OX=216597 GN=SL1344_1760 PE=4 SV=1	1	1	1	1	0	0	0	0	0	0	0	0	0	1	1	0	0	0	1	1	1	1	1	0	1	0	0	0	0	0	0	0	0	0	0	0	0	0	0	0	0	0	0	0
A0A0H3NC63	A0A0H3NC63	3	3	3	tr|A0A0H3NC63|A0A0H3NC63_SALTS Uncharacterized protein OS=Salmonella typhimurium (strain SL1344) OX=216597 GN=yciG PE=4 SV=1	1	3	3	3	3	0	0	0	0	0	0	0	0	0	0	0	0	0	0	0	0	0	0	0	0	0	0	0	0	0	0	0	0	0	0	0	0	0	0	0	0	0	0	0
A0A0H3NC66	A0A0H3NC66	4	4	4	tr|A0A0H3NC66|A0A0H3NC66_SALTS ABC transporter integral membrane subunit OS=Salmonella typhimurium (strain SL1344) OX=216597 GN=ycfU PE=4 SV=1	1	4	4	4	1	1	1	1	0	0	1	1	1	1	1	1	1	1	1	1	1	1	1	0	3	0	0	0	0	0	0	1	1	1	1	1	1	1	1	1	1	1	1	1
A0A0H3NC67	A0A0H3NC67	5	5	5	tr|A0A0H3NC67|A0A0H3NC67_SALTS Uncharacterized protein OS=Salmonella typhimurium (strain SL1344) OX=216597 GN=SL1344_1664 PE=4 SV=1	1	5	5	5	4	4	3	1	1	0	0	0	0	0	0	0	0	0	0	0	0	0	0	0	0	0	2	2	2	1	0	0	0	0	0	0	0	0	0	0	0	0	0	0
A0A0H3NC70	A0A0H3NC70	22	22	22	tr|A0A0H3NC70|A0A0H3NC70_SALTS Putrescine-binding periplasmic protein OS=Salmonella typhimurium (strain SL1344) OX=216597 GN=potD PE=3 SV=1	1	22	22	22	21	20	17	15	13	11	13	9	5	2	2	0	3	0	0	0	0	0	0	0	0	2	6	7	18	3	2	2	1	0	1	0	0	0	0	0	0	0	0	0
A0A0H3NC72	A0A0H3NC72	4	4	4	tr|A0A0H3NC72|A0A0H3NC72_SALTS Uncharacterized protein OS=Salmonella typhimurium (strain SL1344) OX=216597 GN=yciI PE=4 SV=1	1	4	4	4	4	4	3	3	3	3	2	1	0	0	0	0	0	0	0	0	0	0	0	0	0	0	1	2	4	1	0	0	0	0	0	0	0	0	0	0	0	0	0	0
A0A0H3NC75	A0A0H3NC75	7	7	7	tr|A0A0H3NC75|A0A0H3NC75_SALTS Uncharacterized protein OS=Salmonella typhimurium (strain SL1344) OX=216597 GN=ycfD PE=4 SV=1	1	7	7	7	0	5	4	3	2	2	0	0	0	0	0	0	0	0	0	0	0	0	0	0	0	0	0	1	6	1	1	1	0	0	0	0	0	0	0	0	0	0	0	0
A0A0H3NC78	A0A0H3NC78	10	10	10	tr|A0A0H3NC78|A0A0H3NC78_SALTS Oligopeptide transport ATP-binding protein (OppD) OS=Salmonella typhimurium (strain SL1344) OX=216597 GN=oppD PE=3 SV=1	1	10	10	10	1	1	1	0	0	0	2	5	2	2	0	0	0	0	0	0	0	0	0	0	7	0	0	0	0	0	0	0	0	0	0	0	0	0	0	0	0	0	0	0
A0A0H3NC79	A0A0H3NC79	19	19	19	tr|A0A0H3NC79|A0A0H3NC79_SALTS RNA chaperone ProQ OS=Salmonella typhimurium (strain SL1344) OX=216597 GN=proQ PE=3 SV=1	1	19	19	19	12	12	12	11	11	14	14	12	12	11	12	8	11	7	6	4	5	9	7	2	4	5	8	6	12	6	6	5	5	4	3	2	1	0	0	0	0	0	0	0
A0A0H3NC81	A0A0H3NC81	3	3	3	tr|A0A0H3NC81|A0A0H3NC81_SALTS Hypothetical secreted protein OS=Salmonella typhimurium (strain SL1344) OX=216597 GN=SL1344_1174 PE=4 SV=1	1	3	3	3	3	1	1	0	0	0	0	0	0	0	0	0	0	0	0	0	0	0	0	0	0	0	1	1	0	0	0	0	0	0	0	0	0	0	0	0	0	0	0	0
A0A0H3NC84	A0A0H3NC84	3	3	3	tr|A0A0H3NC84|A0A0H3NC84_SALTS Uncharacterized protein OS=Salmonella typhimurium (strain SL1344) OX=216597 GN=SL1344_1780 PE=4 SV=1	1	3	3	3	3	2	2	0	0	0	0	0	0	0	0	0	0	0	0	0	0	0	0	0	0	0	1	1	1	0	0	0	0	0	0	0	0	0	0	0	0	0	0	0
A0A0H3NC85;A0A0H3NFA0	A0A0H3NC85	6;1	6;1	6;1	tr|A0A0H3NC85|A0A0H3NC85_SALTS Hypothetical virulence protein (MsgA) OS=Salmonella typhimurium (strain SL1344) OX=216597 GN=msgA PE=4 SV=1	2	6	6	6	6	6	2	0	0	0	0	0	0	0	0	0	0	0	0	0	0	0	0	0	0	0	1	0	1	0	0	0	0	0	0	0	0	0	0	0	0	0	0	0
A0A0H3NC87	A0A0H3NC87	5	5	5	tr|A0A0H3NC87|A0A0H3NC87_SALTS Regulator of RpoS OS=Salmonella typhimurium (strain SL1344) OX=216597 GN=hnr PE=3 SV=1	1	5	5	5	0	1	1	0	0	0	0	1	1	1	0	0	0	0	0	0	0	0	0	0	2	0	0	0	0	0	0	0	0	0	0	0	0	0	0	0	0	0	0	0
A0A0H3NC89	A0A0H3NC89	1	1	1	tr|A0A0H3NC89|A0A0H3NC89_SALTS Uncharacterized protein OS=Salmonella typhimurium (strain SL1344) OX=216597 GN=SL1344_1785 PE=4 SV=1	1	1	1	1	0	0	0	0	0	0	0	0	0	0	0	0	0	0	0	0	0	0	0	0	0	0	0	0	1	0	0	0	0	0	0	0	0	0	0	0	0	0	0	0
A0A0H3NC90	A0A0H3NC90	2	2	2	tr|A0A0H3NC90|A0A0H3NC90_SALTS Hypothetical secreted protein OS=Salmonella typhimurium (strain SL1344) OX=216597 GN=pliC PE=4 SV=1	1	2	2	2	2	2	2	2	2	2	2	2	2	1	1	0	1	0	0	0	0	0	0	0	0	0	0	0	2	0	0	0	0	0	0	0	0	0	0	0	0	0	0	0
A0A0H3NC94	A0A0H3NC94	2	2	2	tr|A0A0H3NC94|A0A0H3NC94_SALTS Hypothetical lipoprotein OS=Salmonella typhimurium (strain SL1344) OX=216597 GN=SL1344_1190 PE=4 SV=1	1	2	2	2	0	0	0	0	0	0	0	0	0	0	0	0	0	1	2	1	0	0	0	0	0	0	0	0	0	0	0	0	0	0	0	0	0	0	0	0	0	0	0	0
A0A0H3NCA6	A0A0H3NCA6	7	7	7	tr|A0A0H3NCA6|A0A0H3NCA6_SALTS Oligopeptidase OS=Salmonella typhimurium (strain SL1344) OX=216597 GN=opdB PE=4 SV=1	1	7	7	7	0	3	5	4	2	0	1	0	0	0	0	0	0	0	0	0	0	0	0	0	0	0	0	0	3	0	1	0	0	0	0	0	0	0	0	0	0	0	0	0
A0A0H3NCA7	A0A0H3NCA7	19	19	19	tr|A0A0H3NCA7|A0A0H3NCA7_SALTS Peptide chain release factor 1 OS=Salmonella typhimurium (strain SL1344) OX=216597 GN=prfA PE=3 SV=1	1	19	19	19	13	10	5	4	4	5	7	6	8	10	10	5	10	5	5	4	2	6	6	3	12	3	5	5	6	2	2	3	3	4	4	4	4	2	2	2	2	1	1	3
A0A0H3NCB2	A0A0H3NCB2	11	11	11	tr|A0A0H3NCB2|A0A0H3NCB2_SALTS KHG/KDPG aldolase OS=Salmonella typhimurium (strain SL1344) OX=216597 GN=eda PE=4 SV=1	1	11	11	11	10	10	9	9	10	9	8	8	7	4	5	0	1	0	0	0	0	0	0	0	0	5	5	4	8	4	3	3	2	2	2	2	2	0	0	1	1	0	0	0
A0A0H3NCC4	A0A0H3NCC4	6	6	6	tr|A0A0H3NCC4|A0A0H3NCC4_SALTS Holliday junction ATP-dependent DNA helicase RuvB OS=Salmonella typhimurium (strain SL1344) OX=216597 GN=ruvB PE=3 SV=1	1	6	6	6	1	1	0	0	0	1	4	4	3	3	0	0	0	0	0	0	0	0	0	0	1	0	0	0	0	0	0	0	0	0	0	0	0	0	0	0	0	0	0	0
A0A0H3NCC6	A0A0H3NCC6	4	4	4	tr|A0A0H3NCC6|A0A0H3NCC6_SALTS Hypothetical outer membrane protein OS=Salmonella typhimurium (strain SL1344) OX=216597 GN=mipA PE=4 SV=1	1	4	4	4	0	0	0	0	0	1	2	2	1	2	1	0	1	0	0	0	0	0	0	0	2	0	0	0	0	0	0	0	0	0	0	0	0	0	0	0	0	0	0	1
A0A0H3NCD0	A0A0H3NCD0	4	4	4	tr|A0A0H3NCD0|A0A0H3NCD0_SALTS dATP pyrophosphohydrolase OS=Salmonella typhimurium (strain SL1344) OX=216597 GN=ntpA PE=4 SV=1	1	4	4	4	3	2	0	0	0	0	0	0	0	0	0	0	0	0	0	0	0	0	0	0	0	0	2	2	0	1	0	0	0	0	0	0	0	0	0	0	0	0	0	0
A0A0H3NCD1	A0A0H3NCD1	35	35	35	tr|A0A0H3NCD1|A0A0H3NCD1_SALTS Glyceraldehyde-3-phosphate dehydrogenase OS=Salmonella typhimurium (strain SL1344) OX=216597 GN=gapA PE=3 SV=1	1	35	35	35	17	26	30	31	27	28	27	27	24	24	23	10	17	8	10	9	7	6	4	3	4	17	5	21	31	26	23	22	21	16	12	11	9	5	5	5	4	1	1	7
A0A0H3NCD4	A0A0H3NCD4	10	10	10	tr|A0A0H3NCD4|A0A0H3NCD4_SALTS Alanine racemase OS=Salmonella typhimurium (strain SL1344) OX=216597 GN=alr-a PE=3 SV=1	1	10	10	10	5	8	7	7	3	2	3	2	2	2	0	0	0	0	0	0	0	0	0	0	0	1	2	2	5	3	3	3	1	1	2	0	0	0	0	0	0	0	0	0
A0A0H3NCD5	A0A0H3NCD5	11	11	11	tr|A0A0H3NCD5|A0A0H3NCD5_SALTS Carboxy-S-adenosyl-L-methionine synthase OS=Salmonella typhimurium (strain SL1344) OX=216597 GN=yecO PE=3 SV=1	1	11	11	11	6	7	3	2	0	1	0	0	0	0	0	0	0	0	0	0	0	0	0	0	0	2	2	2	7	2	2	1	1	1	1	1	1	1	0	0	0	0	0	0
A0A0H3NCD8	A0A0H3NCD8	11	11	11	tr|A0A0H3NCD8|A0A0H3NCD8_SALTS Protease 4 OS=Salmonella typhimurium (strain SL1344) OX=216597 GN=sppA PE=3 SV=1	1	11	11	11	0	0	0	0	0	0	1	0	0	0	0	0	0	0	0	0	0	0	0	0	9	0	0	0	0	0	0	0	0	0	0	0	0	0	0	0	0	0	0	0
A0A0H3NCE0	A0A0H3NCE0	7	7	7	tr|A0A0H3NCE0|A0A0H3NCE0_SALTS Flagellar protein FlhE OS=Salmonella typhimurium (strain SL1344) OX=216597 GN=flhE PE=4 SV=1	1	7	7	7	6	5	4	3	2	1	1	0	0	0	0	0	0	1	1	1	0	0	0	0	0	0	3	2	2	0	0	0	0	0	0	0	0	0	0	0	0	0	0	0
A0A0H3NCE4	A0A0H3NCE4	5	5	5	tr|A0A0H3NCE4|A0A0H3NCE4_SALTS Hypothetical exported protein OS=Salmonella typhimurium (strain SL1344) OX=216597 GN=SL1344_1235 PE=4 SV=1	1	5	5	5	4	5	5	3	2	2	2	1	1	1	1	0	0	0	0	0	0	0	0	0	0	0	3	2	5	0	1	1	1	1	1	0	0	0	0	0	0	0	0	0
A0A0H3NCE6	A0A0H3NCE6	21	21	21	tr|A0A0H3NCE6|A0A0H3NCE6_SALTS Chemotaxis response regulator protein-glutamate methylesterase OS=Salmonella typhimurium (strain SL1344) OX=216597 GN=cheB PE=3 SV=1	1	21	21	21	20	19	17	13	12	6	7	5	5	5	3	0	1	0	1	0	0	0	1	1	4	4	7	5	12	6	3	4	3	2	2	0	0	0	0	0	0	1	1	0
A0A0H3NCE8	A0A0H3NCE8	9	9	9	tr|A0A0H3NCE8|A0A0H3NCE8_SALTS Hypothetical hydrolase OS=Salmonella typhimurium (strain SL1344) OX=216597 GN=ycgM PE=4 SV=1	1	9	9	9	6	4	4	4	3	2	2	2	2	1	1	0	0	0	0	0	0	0	0	0	0	0	3	3	4	1	0	0	1	0	0	0	0	0	0	0	0	0	0	0
A0A0H3NCF0	A0A0H3NCF0	12	12	12	tr|A0A0H3NCF0|A0A0H3NCF0_SALTS N-succinylglutamate 5-semialdehyde dehydrogenase OS=Salmonella typhimurium (strain SL1344) OX=216597 GN=astD PE=3 SV=1	1	12	12	12	0	8	8	7	6	5	3	1	0	0	0	0	0	0	0	0	0	0	0	0	0	1	0	2	9	3	1	1	0	0	0	0	0	0	1	1	1	1	1	1
A0A0H3NCF1	A0A0H3NCF1	10	10	10	tr|A0A0H3NCF1|A0A0H3NCF1_SALTS Motility protein B OS=Salmonella typhimurium (strain SL1344) OX=216597 GN=motB PE=4 SV=1	1	10	10	10	5	5	4	2	3	2	3	0	0	0	0	1	0	1	1	1	0	0	0	0	4	0	1	1	1	1	1	0	0	0	0	0	0	0	0	0	0	0	0	0
A0A0H3NCF3	A0A0H3NCF3	4	4	4	tr|A0A0H3NCF3|A0A0H3NCF3_SALTS Ribonuclease D OS=Salmonella typhimurium (strain SL1344) OX=216597 GN=rnd PE=3 SV=1	1	4	4	4	3	3	2	1	0	0	0	0	0	0	0	0	0	0	0	0	0	0	0	0	0	0	1	1	1	0	0	0	0	0	0	0	0	0	0	0	0	0	0	0
A0A0H3NCF4	A0A0H3NCF4	24	24	24	tr|A0A0H3NCF4|A0A0H3NCF4_SALTS Bifunctional aspartokinase/homoserine dehydrogenase OS=Salmonella typhimurium (strain SL1344) OX=216597 GN=thrA PE=3 SV=1	1	24	24	24	2	8	18	17	14	10	7	1	1	0	0	0	1	0	0	0	0	0	0	0	0	2	0	0	9	6	5	0	0	0	0	0	0	0	0	0	0	0	0	0
A0A0H3NCF5	A0A0H3NCF5	25	25	25	tr|A0A0H3NCF5|A0A0H3NCF5_SALTS NH(3)-dependent NAD(+) synthetase OS=Salmonella typhimurium (strain SL1344) OX=216597 GN=nadE PE=3 SV=1	1	25	25	25	22	21	18	16	13	9	11	9	5	2	1	0	0	0	0	0	0	0	0	0	0	5	5	9	17	5	4	5	3	4	4	2	1	1	0	0	0	0	0	0
A0A0H3NCF6	A0A0H3NCF6	3	3	3	tr|A0A0H3NCF6|A0A0H3NCF6_SALTS Uncharacterized protein OS=Salmonella typhimurium (strain SL1344) OX=216597 GN=araH PE=4 SV=1	1	3	3	3	2	2	1	0	0	0	0	0	0	0	0	0	0	0	0	0	0	0	0	0	0	0	1	1	0	0	0	0	0	0	0	0	0	0	0	0	0	0	0	0
A0A0H3NCF8	A0A0H3NCF8	28	28	26	tr|A0A0H3NCF8|A0A0H3NCF8_SALTS Transaldolase OS=Salmonella typhimurium (strain SL1344) OX=216597 GN=talB PE=3 SV=1	1	28	28	26	25	26	26	26	26	25	23	23	21	18	15	5	9	2	2	2	0	1	0	0	4	14	17	21	25	21	16	16	16	12	11	10	8	6	5	3	4	0	1	2
A0A0H3NCF9	A0A0H3NCF9	5	5	5	tr|A0A0H3NCF9|A0A0H3NCF9_SALTS Uncharacterized protein OS=Salmonella typhimurium (strain SL1344) OX=216597 GN=yoaB PE=4 SV=1	1	5	5	5	3	3	3	3	3	2	3	2	0	0	0	0	0	0	0	0	0	0	0	0	0	0	3	2	2	2	2	3	3	3	3	1	1	1	1	1	1	0	0	0
A0A0H3NCG1	A0A0H3NCG1	1	1	1	tr|A0A0H3NCG1|A0A0H3NCG1_SALTS Uncharacterized protein OS=Salmonella typhimurium (strain SL1344) OX=216597 GN=yecH PE=4 SV=1	1	1	1	1	1	1	0	0	0	0	0	0	0	1	0	0	0	0	0	0	0	0	0	0	0	0	1	1	1	0	0	0	0	0	0	0	0	0	0	0	0	0	0	0
A0A0H3NCG3	A0A0H3NCG3	68	68	68	tr|A0A0H3NCG3|A0A0H3NCG3_SALTS Chaperone protein DnaK OS=Salmonella typhimurium (strain SL1344) OX=216597 GN=dnaK PE=2 SV=1	1	68	68	68	54	57	59	57	57	57	55	51	52	52	50	36	51	34	36	26	20	37	25	21	40	26	31	40	58	38	31	32	30	31	28	27	22	24	24	25	23	22	25	34
A0A0H3NCG7	A0A0H3NCG7	3	3	3	tr|A0A0H3NCG7|A0A0H3NCG7_SALTS Hypothetical sodium:dicarboxylate symporter OS=Salmonella typhimurium (strain SL1344) OX=216597 GN=ydjN PE=3 SV=1	1	3	3	3	0	0	0	0	0	0	0	0	0	0	0	0	0	0	0	0	0	0	0	0	1	0	0	0	0	0	0	0	0	0	0	0	0	0	0	0	0	0	0	0
A0A0H3NCH0	A0A0H3NCH0	3	3	3	tr|A0A0H3NCH0|A0A0H3NCH0_SALTS Cell-division regulatory protein OS=Salmonella typhimurium (strain SL1344) OX=216597 GN=sdiA PE=4 SV=1	1	3	3	3	0	0	0	0	0	0	2	3	2	0	0	0	0	0	0	0	0	0	0	0	0	0	0	0	0	0	0	0	0	0	0	0	0	0	0	0	0	0	0	0
A0A0H3NCH4	A0A0H3NCH4	2	2	2	tr|A0A0H3NCH4|A0A0H3NCH4_SALTS Uncharacterized protein OS=Salmonella typhimurium (strain SL1344) OX=216597 GN=ydiZ PE=4 SV=1	1	2	2	2	2	1	0	0	0	0	0	0	0	0	0	0	0	0	0	0	0	0	0	0	0	0	0	0	0	0	0	0	0	0	0	0	0	0	0	0	0	0	0	0
A0A0H3NCH8	A0A0H3NCH8	12	12	12	tr|A0A0H3NCH8|A0A0H3NCH8_SALTS FliZ protein OS=Salmonella typhimurium (strain SL1344) OX=216597 GN=fliZ PE=4 SV=1	1	12	12	12	11	11	11	11	11	12	9	8	7	6	2	0	1	0	0	0	0	0	0	0	2	1	2	1	10	3	3	3	4	4	1	1	0	1	1	1	0	0	0	0
A0A0H3NCI3	A0A0H3NCI3	8	8	8	tr|A0A0H3NCI3|A0A0H3NCI3_SALTS Flagellar secretion chaperone FliS OS=Salmonella typhimurium (strain SL1344) OX=216597 GN=fliS PE=3 SV=1	1	8	8	8	7	8	7	7	6	4	4	4	2	2	1	0	1	0	0	0	0	0	0	0	1	0	2	1	6	1	2	1	1	0	0	0	0	0	0	0	0	0	0	0
A0A0H3NCI5	A0A0H3NCI5	2	2	2	tr|A0A0H3NCI5|A0A0H3NCI5_SALTS 50S ribosomal protein L35 OS=Salmonella typhimurium (strain SL1344) OX=216597 GN=rpl35 PE=3 SV=1	1	2	2	2	0	0	0	0	0	0	0	0	0	0	1	1	1	1	2	1	2	1	1	1	1	1	0	0	0	0	0	0	0	0	1	1	1	1	1	1	1	1	1	1
A0A0H3NCI9	A0A0H3NCI9	2	2	2	tr|A0A0H3NCI9|A0A0H3NCI9_SALTS Uncharacterized protein OS=Salmonella typhimurium (strain SL1344) OX=216597 GN=yedF PE=3 SV=1	1	2	2	2	2	2	0	1	0	0	0	0	0	0	0	1	0	0	0	0	0	0	0	0	0	0	2	2	0	0	0	0	1	1	1	0	0	0	0	0	0	0	0	0
A0A0H3NCJ0	A0A0H3NCJ0	11	11	11	tr|A0A0H3NCJ0|A0A0H3NCJ0_SALTS Hypothetical glycosyl hydrolase OS=Salmonella typhimurium (strain SL1344) OX=216597 GN=SL1344_0042 PE=3 SV=1	1	11	11	11	0	0	0	2	6	6	5	2	1	1	1	0	0	0	0	0	0	0	0	0	0	0	0	0	0	1	1	1	1	1	1	0	0	0	0	0	0	0	0	0
A0A0H3NCJ4	A0A0H3NCJ4	61	61	61	tr|A0A0H3NCJ4|A0A0H3NCJ4_SALTS Isoleucine--tRNA ligase OS=Salmonella typhimurium (strain SL1344) OX=216597 GN=ileS PE=3 SV=1	1	61	61	61	35	48	51	52	47	43	41	31	28	19	15	2	5	2	2	1	0	0	0	0	0	4	12	20	51	19	18	12	11	7	5	5	3	2	2	2	2	0	0	0
A0A0H3NCJ5	A0A0H3NCJ5	7	7	7	tr|A0A0H3NCJ5|A0A0H3NCJ5_SALTS Flagellar assembly protein FliH OS=Salmonella typhimurium (strain SL1344) OX=216597 GN=fliH PE=4 SV=1	1	7	7	7	6	5	6	5	5	4	3	3	2	1	2	1	2	0	2	0	1	1	0	0	2	1	2	2	6	2	1	1	0	0	0	0	0	0	0	0	0	0	0	0
A0A0H3NCJ6	A0A0H3NCJ6	9	9	9	tr|A0A0H3NCJ6|A0A0H3NCJ6_SALTS UPF0061 protein YdiU OS=Salmonella typhimurium (strain SL1344) OX=216597 GN=ydiU PE=3 SV=1	1	9	9	9	0	2	1	0	0	0	1	6	6	5	1	0	0	0	0	0	0	0	0	0	0	1	0	0	1	1	0	0	0	1	2	0	1	1	0	0	0	0	0	0
A0A0H3NCJ8	A0A0H3NCJ8	9	9	9	tr|A0A0H3NCJ8|A0A0H3NCJ8_SALTS Non-specific ribonucleoside hydrolase RihC OS=Salmonella typhimurium (strain SL1344) OX=216597 GN=rihC PE=3 SV=1	1	9	9	9	0	6	6	5	5	0	1	0	0	0	0	0	0	0	0	0	0	0	0	0	0	1	1	3	8	4	3	2	1	0	0	0	0	0	0	0	0	0	0	0
A0A0H3NCJ9	A0A0H3NCJ9	8	8	8	tr|A0A0H3NCJ9|A0A0H3NCJ9_SALTS Hypothetical acetyltransferase OS=Salmonella typhimurium (strain SL1344) OX=216597 GN=SL1344_1787 PE=4 SV=1	1	8	8	8	6	4	4	4	1	1	0	0	0	0	0	0	1	0	0	0	0	0	0	0	0	1	1	0	1	1	0	0	0	0	1	1	1	0	0	0	0	0	0	0
A0A0H3NCK0	A0A0H3NCK0	8	8	8	tr|A0A0H3NCK0|A0A0H3NCK0_SALTS Flagellar motor switch protein FliM OS=Salmonella typhimurium (strain SL1344) OX=216597 GN=fliM PE=3 SV=1	1	8	8	8	0	0	0	0	0	1	1	2	1	1	1	0	1	0	0	0	0	1	0	1	8	2	0	0	0	0	1	1	1	1	1	1	0	0	0	0	0	0	0	1
A0A0H3NCL4	A0A0H3NCL4	4	4	4	tr|A0A0H3NCL4|A0A0H3NCL4_SALTS Transcriptional activator CaiF OS=Salmonella typhimurium (strain SL1344) OX=216597 GN=caiF PE=4 SV=1	1	4	4	4	2	1	1	1	1	1	2	2	0	1	1	0	0	0	1	0	0	0	0	0	0	0	0	0	0	0	0	0	0	0	0	0	0	0	0	0	0	0	0	0
A0A0H3NCL6	A0A0H3NCL6	4	4	4	tr|A0A0H3NCL6|A0A0H3NCL6_SALTS DNA polymerase III, theta subunit OS=Salmonella typhimurium (strain SL1344) OX=216597 GN=holE PE=4 SV=1	1	4	4	4	4	3	1	1	0	2	1	1	2	2	1	1	1	0	1	1	1	0	0	0	1	1	1	1	1	1	1	1	1	1	1	0	0	0	0	0	0	0	0	0
A0A0H3NCL7	A0A0H3NCL7	15	15	15	tr|A0A0H3NCL7|A0A0H3NCL7_SALTS Cytosine-specific methyltransferase OS=Salmonella typhimurium (strain SL1344) OX=216597 GN=dcm PE=3 SV=1	1	15	15	15	0	2	2	7	9	12	12	8	1	1	0	0	0	0	0	0	0	0	0	0	0	2	0	1	1	1	2	3	3	3	2	2	0	0	0	0	0	0	0	0
A0A0H3NCL9	A0A0H3NCL9	5	5	5	tr|A0A0H3NCL9|A0A0H3NCL9_SALTS Uncharacterized protein OS=Salmonella typhimurium (strain SL1344) OX=216597 GN=ydiH PE=4 SV=1	1	5	5	5	4	2	2	2	3	3	2	2	1	0	0	0	0	0	0	0	0	0	0	0	0	0	0	0	2	0	0	0	0	0	0	0	0	1	1	1	0	0	0	0
A0A0H3NCM2	A0A0H3NCM2	9	9	9	tr|A0A0H3NCM2|A0A0H3NCM2_SALTS Protein YebF OS=Salmonella typhimurium (strain SL1344) OX=216597 GN=yebF PE=3 SV=1	1	9	9	9	9	5	3	0	0	1	1	0	1	0	0	0	0	0	0	0	0	0	0	0	0	5	8	7	7	2	1	1	2	2	1	0	0	0	0	0	0	0	0	0
A0A0H3NCM3	A0A0H3NCM3	9	9	9	tr|A0A0H3NCM3|A0A0H3NCM3_SALTS Uncharacterized protein OS=Salmonella typhimurium (strain SL1344) OX=216597 GN=sufD PE=4 SV=1	1	9	9	9	0	2	6	4	3	1	1	0	0	0	0	0	0	0	0	0	0	0	0	0	0	2	0	1	3	1	2	0	0	0	0	0	0	0	0	0	0	0	0	0
A0A0H3NCM7	A0A0H3NCM7	40	40	40	tr|A0A0H3NCM7|A0A0H3NCM7_SALTS Glucose-6-phosphate 1-dehydrogenase OS=Salmonella typhimurium (strain SL1344) OX=216597 GN=zwf PE=3 SV=1	1	40	40	40	0	16	32	35	35	31	25	24	20	12	10	2	2	2	2	2	1	0	0	0	0	6	1	5	33	19	18	14	13	8	5	5	1	1	1	1	0	0	0	0
A0A0H3NCM8;A0A0H3NKT8	A0A0H3NCM8	8;2	8;2	8;2	tr|A0A0H3NCM8|A0A0H3NCM8_SALTS Major outer membrane lipoprotein OS=Salmonella typhimurium (strain SL1344) OX=216597 GN=lpp PE=4 SV=1	2	8	8	8	4	4	3	3	4	4	5	4	4	5	5	3	7	5	6	5	5	5	3	1	3	1	1	1	1	0	0	1	1	1	1	1	1	1	1	1	1	0	0	4
A0A0H3NCN1	A0A0H3NCN1	10	10	10	tr|A0A0H3NCN1|A0A0H3NCN1_SALTS Ribosomal RNA small subunit methyltransferase A OS=Salmonella typhimurium (strain SL1344) OX=216597 GN=ksgA PE=3 SV=1	1	10	10	10	5	6	5	3	2	1	1	1	1	0	0	0	0	0	0	0	0	0	0	0	5	0	0	0	2	0	1	2	2	4	3	4	3	1	0	0	0	0	0	1
A0A0H3NCN2	A0A0H3NCN2	11	11	11	tr|A0A0H3NCN2|A0A0H3NCN2_SALTS High-affinity zinc uptake system periplasmic binding protein OS=Salmonella typhimurium (strain SL1344) OX=216597 GN=znuA PE=4 SV=1	1	11	11	11	10	9	8	5	5	2	0	0	0	0	0	0	0	0	0	0	0	0	0	0	0	2	2	3	7	2	2	1	0	0	0	0	0	0	0	0	0	0	0	0
A0A0H3NCN3	A0A0H3NCN3	6	6	6	tr|A0A0H3NCN3|A0A0H3NCN3_SALTS Ribokinase OS=Salmonella typhimurium (strain SL1344) OX=216597 GN=orf408 PE=3 SV=1	1	6	6	6	0	0	0	0	0	1	3	5	3	0	0	0	0	0	0	0	0	0	0	0	0	0	0	0	0	0	0	0	0	2	1	1	0	0	0	0	0	0	0	0
A0A0H3NCN6	A0A0H3NCN6	2	2	2	tr|A0A0H3NCN6|A0A0H3NCN6_SALTS Pseudouridine synthase OS=Salmonella typhimurium (strain SL1344) OX=216597 GN=rluA PE=3 SV=1	1	2	2	2	2	0	0	0	0	0	0	0	0	0	0	0	0	0	0	0	0	0	0	0	0	0	0	0	0	0	0	0	0	0	0	0	0	0	0	0	0	0	0	0
A0A0H3NCN8	A0A0H3NCN8	1	1	1	tr|A0A0H3NCN8|A0A0H3NCN8_SALTS Hypothetical two-component response regulator OS=Salmonella typhimurium (strain SL1344) OX=216597 GN=ttrR PE=4 SV=1	1	1	1	1	0	0	0	0	0	0	0	0	0	0	0	0	0	0	0	0	0	0	0	0	1	0	0	0	0	0	0	0	0	0	0	0	0	0	0	0	0	0	0	0
A0A0H3NCP0	A0A0H3NCP0	3	3	3	tr|A0A0H3NCP0|A0A0H3NCP0_SALTS Hypothetical hydrolase OS=Salmonella typhimurium (strain SL1344) OX=216597 GN=yecD PE=4 SV=1	1	3	3	3	1	3	3	1	0	0	0	0	0	0	0	0	0	0	0	0	0	0	0	0	0	0	0	0	2	0	0	0	0	0	0	0	0	0	0	0	0	0	0	0
A0A0H3NCP5	A0A0H3NCP5	7	7	7	tr|A0A0H3NCP5|A0A0H3NCP5_SALTS Copper homeostasis protein CutC OS=Salmonella typhimurium (strain SL1344) OX=216597 GN=cutC PE=3 SV=1	1	7	7	7	4	6	3	1	1	0	0	0	0	0	0	0	0	0	0	0	0	0	0	0	0	0	0	0	2	0	0	0	0	0	0	1	1	0	0	0	0	0	0	0
A0A0H3NCP8	A0A0H3NCP8	9	9	9	tr|A0A0H3NCP8|A0A0H3NCP8_SALTS 3-isopropylmalate dehydratase large subunit OS=Salmonella typhimurium (strain SL1344) OX=216597 GN=leuC PE=3 SV=1	1	9	9	9	4	7	4	2	0	0	0	0	0	0	0	0	0	0	0	0	0	0	0	0	0	0	2	3	3	0	1	1	1	0	0	0	0	0	0	0	0	0	0	0
A0A0H3NCQ2	A0A0H3NCQ2	10	10	10	tr|A0A0H3NCQ2|A0A0H3NCQ2_SALTS Acetolactate synthase OS=Salmonella typhimurium (strain SL1344) OX=216597 GN=ilvI PE=3 SV=1	1	10	10	10	0	3	7	6	5	1	1	0	0	0	0	0	0	0	0	0	0	0	0	0	0	2	0	1	4	2	2	2	0	0	0	0	0	0	0	0	0	0	0	0
A0A0H3NCQ5	A0A0H3NCQ5	1	1	1	tr|A0A0H3NCQ5|A0A0H3NCQ5_SALTS Cell division protein FtsL OS=Salmonella typhimurium (strain SL1344) OX=216597 GN=ftsL PE=3 SV=1	1	1	1	1	0	0	0	0	0	0	0	0	0	0	0	0	0	0	0	0	0	0	0	0	1	0	0	0	0	0	0	0	0	0	0	0	0	0	0	0	0	0	0	0
A0A0H3NCQ6	A0A0H3NCQ6	21	21	19	tr|A0A0H3NCQ6|A0A0H3NCQ6_SALTS Methyl-accepting chemotaxis protein II OS=Salmonella typhimurium (strain SL1344) OX=216597 GN=cheM PE=4 SV=1	1	21	21	19	1	0	0	1	1	1	1	3	2	3	4	0	4	3	6	4	4	5	4	0	19	1	0	0	0	0	0	0	0	0	0	0	0	0	0	0	0	0	0	3
A0A0H3NCR0	A0A0H3NCR0	16	16	16	tr|A0A0H3NCR0|A0A0H3NCR0_SALTS UDP-N-acetylmuramoylalanine--D-glutamate ligase OS=Salmonella typhimurium (strain SL1344) OX=216597 GN=murD PE=3 SV=1	1	16	16	16	15	16	13	11	12	4	4	0	1	1	0	0	0	0	0	0	0	0	0	0	0	2	3	6	10	3	3	3	2	2	1	1	1	1	1	1	0	0	0	0
A0A0H3NCR4	A0A0H3NCR4	3	3	3	tr|A0A0H3NCR4|A0A0H3NCR4_SALTS Putative sugar phosphate isomerase OS=Salmonella typhimurium (strain SL1344) OX=216597 GN=SL1344_1866 PE=4 SV=1	1	3	3	3	0	1	2	0	0	1	0	0	0	0	0	0	0	0	0	0	0	0	0	0	0	0	0	0	0	0	0	0	0	0	0	0	0	0	0	0	0	0	0	0
A0A0H3NCR5	A0A0H3NCR5	2	2	2	tr|A0A0H3NCR5|A0A0H3NCR5_SALTS Cell division protein FtsQ OS=Salmonella typhimurium (strain SL1344) OX=216597 GN=ftsQ PE=3 SV=1	1	2	2	2	0	0	0	0	0	0	0	0	0	0	0	0	0	0	0	0	0	0	0	0	2	0	0	0	0	0	0	0	0	0	0	0	0	0	0	0	0	0	0	0
A0A0H3NCR8	A0A0H3NCR8	59	59	59	tr|A0A0H3NCR8|A0A0H3NCR8_SALTS Protein translocase subunit SecA OS=Salmonella typhimurium (strain SL1344) OX=216597 GN=secA PE=2 SV=1	1	59	59	59	4	41	48	48	44	29	33	21	14	11	7	2	4	1	2	0	0	1	1	2	7	12	2	16	42	19	21	17	16	11	6	4	3	2	3	2	2	0	1	1
A0A0H3NCR9	A0A0H3NCR9	9	9	9	tr|A0A0H3NCR9|A0A0H3NCR9_SALTS Uncharacterized protein OS=Salmonella typhimurium (strain SL1344) OX=216597 GN=yecA PE=3 SV=1	1	9	9	9	7	7	6	5	2	1	0	0	0	0	0	0	0	0	0	0	0	0	0	0	0	0	1	1	3	0	0	0	0	0	0	0	0	0	0	0	0	0	0	0
A0A0H3NCS2	A0A0H3NCS2	17	17	17	tr|A0A0H3NCS2|A0A0H3NCS2_SALTS GMP reductase OS=Salmonella typhimurium (strain SL1344) OX=216597 GN=guaC PE=3 SV=1	1	17	17	17	8	10	11	14	10	9	7	8	5	4	2	0	1	0	0	0	0	0	0	0	0	0	0	0	13	6	6	3	2	1	1	1	0	0	0	0	0	0	0	0
A0A0H3NCS4	A0A0H3NCS4	5	5	5	tr|A0A0H3NCS4|A0A0H3NCS4_SALTS UvrABC system protein C OS=Salmonella typhimurium (strain SL1344) OX=216597 GN=uvrC PE=3 SV=1	1	5	5	5	0	0	0	0	0	1	2	1	1	0	0	0	0	0	0	0	0	0	0	0	3	0	0	0	0	0	0	0	1	0	0	0	0	0	0	0	0	0	0	0
A0A0H3NCS9	A0A0H3NCS9	12	12	12	tr|A0A0H3NCS9|A0A0H3NCS9_SALTS Ribonuclease T OS=Salmonella typhimurium (strain SL1344) OX=216597 GN=rnt PE=3 SV=1	1	12	12	12	10	10	7	6	6	4	1	1	1	1	0	0	0	0	0	0	0	0	0	0	0	4	5	7	10	5	3	3	2	1	0	0	0	0	0	0	0	0	0	0
A0A0H3NCT0	A0A0H3NCT0	54	54	54	tr|A0A0H3NCT0|A0A0H3NCT0_SALTS Dihydrolipoyl dehydrogenase OS=Salmonella typhimurium (strain SL1344) OX=216597 GN=lpdA PE=3 SV=1	1	54	54	54	18	25	26	26	30	33	33	34	34	37	37	31	47	44	38	31	24	22	19	12	13	20	12	21	24	23	25	27	28	28	28	31	32	31	32	33	31	26	25	22
A0A0H3NCT3	A0A0H3NCT3	26	26	26	tr|A0A0H3NCT3|A0A0H3NCT3_SALTS Lysine-N-methylase (Ec 2.1.1.-) (Lysine N-methyltransferase) OS=Salmonella typhimurium (strain SL1344) OX=216597 GN=fliB PE=4 SV=1	1	26	26	26	22	23	22	22	20	12	11	13	12	11	9	3	9	4	9	6	4	6	1	0	7	3	4	7	18	5	5	2	1	0	0	0	0	0	0	0	0	0	1	5
A0A0H3NCT4	A0A0H3NCT4	9	9	9	tr|A0A0H3NCT4|A0A0H3NCT4_SALTS Hypothetical oxidoreductase OS=Salmonella typhimurium (strain SL1344) OX=216597 GN=ydhF PE=4 SV=1	1	9	9	9	2	7	6	4	4	3	3	3	2	2	1	0	0	0	0	0	0	0	0	0	0	1	1	1	6	1	1	2	1	1	1	1	0	0	0	0	0	0	0	0
A0A0H3NCT6	A0A0H3NCT6	7	7	7	tr|A0A0H3NCT6|A0A0H3NCT6_SALTS UPF0231 protein YacL OS=Salmonella typhimurium (strain SL1344) OX=216597 GN=yacL PE=3 SV=1	1	7	7	7	2	2	1	1	1	4	5	3	5	3	2	1	2	1	0	0	0	0	0	0	0	0	0	0	0	0	1	0	2	2	2	2	1	2	2	1	1	1	1	1
A0A0H3NCT9	A0A0H3NCT9	3	3	3	tr|A0A0H3NCT9|A0A0H3NCT9_SALTS Cytoplasmic alpha-amylase OS=Salmonella typhimurium (strain SL1344) OX=216597 GN=amyA PE=4 SV=1	1	3	3	3	1	2	1	0	0	0	0	0	0	0	0	0	0	0	0	0	0	0	0	0	0	0	0	0	0	0	0	0	0	0	0	1	1	0	0	0	0	0	0	0
A0A0H3NCU0	A0A0H3NCU0	5	5	5	tr|A0A0H3NCU0|A0A0H3NCU0_SALTS Transcriptional regulator SlyA OS=Salmonella typhimurium (strain SL1344) OX=216597 GN=slyA PE=3 SV=1	1	5	5	5	5	5	4	4	4	3	4	2	1	2	1	0	1	0	0	0	0	0	0	0	0	0	2	3	5	3	1	1	1	0	0	0	0	0	0	0	0	0	0	0
A0A0H3NCU1	A0A0H3NCU1	10	10	10	tr|A0A0H3NCU1|A0A0H3NCU1_SALTS S-adenosylmethionine decarboxylase proenzyme OS=Salmonella typhimurium (strain SL1344) OX=216597 GN=speD PE=3 SV=1	1	10	10	10	8	7	7	8	6	3	1	0	0	0	1	0	0	0	0	0	0	0	0	0	0	3	4	6	8	6	6	6	3	2	1	0	0	0	0	0	0	0	0	0
A0A0H3NCU4	A0A0H3NCU4	25	25	25	tr|A0A0H3NCU4|A0A0H3NCU4_SALTS Tyrosine--tRNA ligase OS=Salmonella typhimurium (strain SL1344) OX=216597 GN=tyrS PE=3 SV=1	1	25	25	25	13	19	20	21	19	19	15	12	9	8	6	2	3	1	1	1	0	0	0	0	0	3	9	11	23	13	12	11	7	5	1	1	1	0	0	0	0	0	0	0
A0A0H3NCU6	A0A0H3NCU6	14	14	14	tr|A0A0H3NCU6|A0A0H3NCU6_SALTS Hypoxanthine phosphoribosyltransferase OS=Salmonella typhimurium (strain SL1344) OX=216597 GN=hpt PE=3 SV=1	1	14	14	14	11	12	13	13	8	8	7	4	3	2	3	1	1	0	0	0	0	0	0	0	0	4	5	7	13	7	5	4	1	0	1	1	1	1	1	1	1	0	1	1
A0A0H3NCU9	A0A0H3NCU9	9	9	9	tr|A0A0H3NCU9|A0A0H3NCU9_SALTS Flagellar FliJ protein OS=Salmonella typhimurium (strain SL1344) OX=216597 GN=fliJ PE=3 SV=1	1	9	9	9	7	4	5	3	2	1	1	0	0	0	0	0	0	0	0	0	0	0	0	0	0	0	0	0	5	0	0	0	0	0	0	0	0	0	0	0	0	0	0	0
A0A0H3NCV5	A0A0H3NCV5	4	4	4	tr|A0A0H3NCV5|A0A0H3NCV5_SALTS Aspartate 1-decarboxylase OS=Salmonella typhimurium (strain SL1344) OX=216597 GN=panD PE=3 SV=1	1	4	4	4	3	3	2	2	3	3	3	3	3	1	0	0	0	0	0	0	0	0	0	0	0	0	0	0	4	0	0	1	0	0	0	0	0	0	0	0	0	0	0	0
A0A0H3NCV8	A0A0H3NCV8	1	1	1	tr|A0A0H3NCV8|A0A0H3NCV8_SALTS Flagellar protein OS=Salmonella typhimurium (strain SL1344) OX=216597 GN=fliO PE=3 SV=1	1	1	1	1	0	0	0	0	0	0	0	0	0	0	0	0	0	0	0	0	0	0	0	0	1	0	0	0	0	0	0	0	0	0	0	0	0	0	0	0	0	0	0	0
A0A0H3NCW0	A0A0H3NCW0	5	5	5	tr|A0A0H3NCW0|A0A0H3NCW0_SALTS Glutamyl-Q tRNA(Asp) synthetase OS=Salmonella typhimurium (strain SL1344) OX=216597 GN=yadB PE=3 SV=1	1	5	5	5	4	4	3	1	0	0	0	0	0	0	0	0	0	0	0	0	0	0	0	0	0	0	1	1	2	0	0	0	0	0	0	0	0	0	0	0	0	0	0	0
A0A0H3NCW1	A0A0H3NCW1	23	23	23	tr|A0A0H3NCW1|A0A0H3NCW1_SALTS Uncharacterized protein OS=Salmonella typhimurium (strain SL1344) OX=216597 GN=ydgA PE=4 SV=1	1	23	23	23	0	0	0	0	1	1	1	1	4	4	2	2	2	1	1	1	2	4	2	1	20	2	0	0	0	0	0	0	0	0	0	0	0	1	1	1	1	0	1	1
A0A0H3NCW5	A0A0H3NCW5	27	27	27	tr|A0A0H3NCW5|A0A0H3NCW5_SALTS AMP nucleosidase OS=Salmonella typhimurium (strain SL1344) OX=216597 GN=amn PE=3 SV=1	1	27	27	27	0	3	9	19	14	15	9	4	1	0	0	0	0	0	0	0	0	0	0	0	0	2	0	0	7	9	10	6	5	1	0	0	0	0	0	0	0	0	0	0
A0A0H3NCW6	A0A0H3NCW6	14	14	14	tr|A0A0H3NCW6|A0A0H3NCW6_SALTS Penicillin-binding protein 1B OS=Salmonella typhimurium (strain SL1344) OX=216597 GN=mrcB PE=3 SV=1	1	14	14	14	1	1	1	1	0	0	0	0	0	0	0	0	0	0	0	0	0	0	0	0	10	0	0	0	0	0	0	0	0	0	0	0	0	1	0	0	0	0	0	0
A0A0H3NCX0	A0A0H3NCX0	13	12	12	tr|A0A0H3NCX0|A0A0H3NCX0_SALTS Hypothetical exported protein OS=Salmonella typhimurium (strain SL1344) OX=216597 GN=erfK PE=4 SV=1	1	13	12	12	11	11	6	1	1	1	0	0	0	0	0	0	0	0	0	0	0	0	0	0	1	1	1	1	1	1	1	1	0	0	0	0	0	0	0	0	0	0	0	0
A0A0H3NCX4	A0A0H3NCX4	9	9	9	tr|A0A0H3NCX4|A0A0H3NCX4_SALTS Cobalt import ATP-binding protein CbiO OS=Salmonella typhimurium (strain SL1344) OX=216597 GN=cbiO PE=3 SV=1	1	9	9	9	0	0	0	0	0	0	5	8	8	3	2	1	0	0	0	0	0	0	0	0	0	0	0	0	0	0	0	0	2	2	1	0	0	0	0	0	0	0	0	0
A0A0H3NCX9	A0A0H3NCX9	10	10	10	tr|A0A0H3NCX9|A0A0H3NCX9_SALTS Sirohydrochlorin cobaltochelatase OS=Salmonella typhimurium (strain SL1344) OX=216597 GN=cbiK PE=3 SV=1	1	10	10	10	7	8	8	4	3	3	2	1	1	0	0	0	0	0	0	1	1	1	1	0	0	1	4	4	8	2	1	1	1	0	0	0	0	0	0	1	1	1	1	1
A0A0H3NCY2	A0A0H3NCY2	5	5	5	tr|A0A0H3NCY2|A0A0H3NCY2_SALTS Vitamin B12-binding protein OS=Salmonella typhimurium (strain SL1344) OX=216597 GN=btuF PE=3 SV=1	1	5	5	5	4	2	1	1	0	0	2	0	0	0	0	0	0	0	0	0	0	0	0	0	0	0	1	1	0	0	0	0	0	0	0	0	0	0	0	0	0	0	0	0
A0A0H3NCY4	A0A0H3NCY4	1	1	1	tr|A0A0H3NCY4|A0A0H3NCY4_SALTS Precorrin-8W decarboxylase OS=Salmonella typhimurium (strain SL1344) OX=216597 GN=cbiT PE=4 SV=1	1	1	1	1	0	1	1	0	0	0	0	0	0	0	0	0	0	0	0	0	0	0	0	0	0	0	0	0	0	0	0	0	0	0	0	0	0	0	0	0	0	0	0	0
A0A0H3NCY7	A0A0H3NCY7	13	13	13	tr|A0A0H3NCY7|A0A0H3NCY7_SALTS UPF0325 protein YaeH OS=Salmonella typhimurium (strain SL1344) OX=216597 GN=yaeH PE=3 SV=1	1	13	13	13	13	13	13	12	11	10	11	9	8	5	6	4	2	1	2	2	0	1	0	0	3	3	6	8	11	4	2	2	3	3	2	1	0	1	2	2	0	0	0	1
A0A0H3NCY8	A0A0H3NCY8	10	10	10	tr|A0A0H3NCY8|A0A0H3NCY8_SALTS Cobyrinate a,c-diamide synthase OS=Salmonella typhimurium (strain SL1344) OX=216597 GN=cbiA PE=3 SV=1	1	10	10	10	7	6	5	4	4	2	5	7	6	3	1	0	0	0	0	0	0	0	0	0	1	1	2	2	3	2	0	0	1	1	1	1	0	0	0	0	0	0	0	0
A0A0H3NCZ1	A0A0H3NCZ1	23	23	23	tr|A0A0H3NCZ1|A0A0H3NCZ1_SALTS 30S ribosomal protein S2 OS=Salmonella typhimurium (strain SL1344) OX=216597 GN=rpsB PE=3 SV=1	1	23	23	23	9	8	10	10	11	11	12	13	17	18	19	11	18	6	15	10	19	20	18	14	17	10	3	2	11	3	3	4	6	7	13	14	13	13	13	12	13	12	11	18
A0A0H3NCZ4	A0A0H3NCZ4	20	20	20	tr|A0A0H3NCZ4|A0A0H3NCZ4_SALTS Glycerol dehydratase large subunit OS=Salmonella typhimurium (strain SL1344) OX=216597 GN=dhaB PE=3 SV=1	1	20	20	20	1	4	11	17	17	12	12	4	4	3	3	0	0	0	0	0	0	0	0	0	0	1	1	2	11	4	4	5	5	5	4	1	1	1	1	0	0	0	0	0
A0A0H3NCZ5	A0A0H3NCZ5	7	7	7	tr|A0A0H3NCZ5|A0A0H3NCZ5_SALTS Ditrans,polycis-undecaprenyl-diphosphate synthase ((2E,6E)-farnesyl-diphosphate specific) OS=Salmonella typhimurium (strain SL1344) OX=216597 GN=uppS PE=3 SV=1	1	7	7	7	4	5	4	3	0	0	1	0	0	0	0	0	0	0	0	0	0	0	0	0	0	1	0	1	1	0	0	0	0	0	0	0	0	0	0	0	0	0	0	0
A0A0H3NCZ8	A0A0H3NCZ8	7	7	7	tr|A0A0H3NCZ8|A0A0H3NCZ8_SALTS Propanediol utilization protein OS=Salmonella typhimurium (strain SL1344) OX=216597 GN=pduJ PE=4 SV=1	1	7	7	7	6	6	5	5	3	1	2	2	1	1	0	0	0	0	0	0	0	0	0	0	0	1	2	2	5	3	2	3	1	0	1	0	0	0	0	0	0	0	0	0
A0A0H3NCZ9	A0A0H3NCZ9	5	5	5	tr|A0A0H3NCZ9|A0A0H3NCZ9_SALTS UDP-3-O-(3-hydroxymyristoyl)glucosamine N-acyltransferase OS=Salmonella typhimurium (strain SL1344) OX=216597 GN=lpxD PE=3 SV=1	1	5	5	5	0	1	3	1	1	0	1	1	0	1	0	0	0	0	0	0	0	0	0	0	0	0	0	1	3	1	2	0	0	0	0	0	0	0	0	0	0	0	0	0
A0A0H3ND02	A0A0H3ND02	4	4	4	tr|A0A0H3ND02|A0A0H3ND02_SALTS Capsid related protein OS=Salmonella typhimurium (strain SL1344) OX=216597 GN=SL1344_1947 PE=4 SV=1	1	4	4	4	1	0	0	0	0	0	0	0	0	0	0	0	0	0	0	0	0	0	0	0	2	0	0	0	1	0	0	0	0	0	0	0	0	0	0	0	0	0	0	0
A0A0H3ND04	A0A0H3ND04	20	20	20	tr|A0A0H3ND04|A0A0H3ND04_SALTS DNA-directed DNA polymerase OS=Salmonella typhimurium (strain SL1344) OX=216597 GN=dnaE PE=4 SV=1	1	20	20	20	0	0	9	13	11	7	8	3	1	0	0	0	0	0	0	0	1	0	0	0	1	2	0	0	1	1	1	1	0	0	0	0	0	0	0	0	0	0	0	0
A0A0H3ND05	A0A0H3ND05	11	11	11	tr|A0A0H3ND05|A0A0H3ND05_SALTS tRNA(Ile)-lysidine synthase OS=Salmonella typhimurium (strain SL1344) OX=216597 GN=mesJ PE=3 SV=1	1	11	11	11	0	7	7	7	5	2	1	0	0	0	0	0	0	0	0	0	0	0	0	0	0	0	0	2	8	1	1	0	0	0	0	0	0	0	0	0	0	0	0	0
A0A0H3ND08	A0A0H3ND08	27	27	27	tr|A0A0H3ND08|A0A0H3ND08_SALTS Thiosulfate reductase OS=Salmonella typhimurium (strain SL1344) OX=216597 GN=phsA PE=3 SV=1	1	27	27	27	8	21	24	19	18	11	12	7	8	3	2	0	0	0	0	0	0	0	1	1	7	0	0	2	15	2	1	1	1	0	1	0	0	0	0	0	0	0	0	0
A0A0H3ND10	A0A0H3ND10	16	16	16	tr|A0A0H3ND10|A0A0H3ND10_SALTS Spermidine N1-acetyltransferase OS=Salmonella typhimurium (strain SL1344) OX=216597 GN=speG PE=4 SV=1	1	16	16	16	8	8	6	11	11	9	7	6	4	3	2	0	1	0	0	0	0	0	0	0	0	4	3	3	10	10	7	5	5	4	3	2	1	0	0	0	0	0	0	0
A0A0H3ND11	A0A0H3ND11	9	9	9	tr|A0A0H3ND11|A0A0H3ND11_SALTS Uncharacterized protein OS=Salmonella typhimurium (strain SL1344) OX=216597 GN=yeeZ PE=4 SV=1	1	9	9	9	8	8	7	3	2	0	0	0	0	0	0	0	0	0	0	0	0	0	0	0	0	1	3	3	5	1	0	0	0	0	0	0	0	0	0	0	0	0	0	0
A0A0H3ND12	A0A0H3ND12	9	5	5	tr|A0A0H3ND12|A0A0H3ND12_SALTS Hypothetical D-mannonate oxidoreductase OS=Salmonella typhimurium (strain SL1344) OX=216597 GN=ydfI PE=3 SV=1	1	9	5	5	6	8	6	1	1	0	0	0	0	0	0	0	0	0	0	0	0	0	0	0	0	0	1	1	4	0	0	0	0	0	0	0	0	0	0	0	0	0	0	0
A0A0H3ND14	A0A0H3ND14	11	11	11	tr|A0A0H3ND14|A0A0H3ND14_SALTS Imidazole glycerol phosphate synthase subunit HisH OS=Salmonella typhimurium (strain SL1344) OX=216597 GN=hisH PE=3 SV=1	1	11	11	11	9	9	7	4	2	2	2	1	0	0	0	0	0	0	0	0	0	0	0	0	0	0	4	2	5	0	0	0	0	0	0	0	0	0	0	0	0	0	0	0
A0A0H3ND19	A0A0H3ND19	16	16	16	tr|A0A0H3ND19|A0A0H3ND19_SALTS UDP-glucose 6-dehydrogenase OS=Salmonella typhimurium (strain SL1344) OX=216597 GN=udg PE=3 SV=1	1	16	16	16	7	14	14	11	8	8	9	6	5	1	1	1	1	0	0	0	0	0	0	0	1	1	0	2	4	2	1	0	1	1	2	1	0	0	0	0	0	0	0	0
A0A0H3ND22	A0A0H3ND22	9	9	9	tr|A0A0H3ND22|A0A0H3ND22_SALTS Rhamnosyltransferase OS=Salmonella typhimurium (strain SL1344) OX=216597 GN=rfbN PE=4 SV=1	1	9	9	9	0	0	0	0	0	0	2	4	3	1	1	0	0	0	1	0	1	1	0	0	6	0	0	0	0	0	0	0	0	0	0	0	0	0	0	0	0	0	0	0
A0A0H3ND24	A0A0H3ND24	3	3	3	tr|A0A0H3ND24|A0A0H3ND24_SALTS Hypothetical exported protein OS=Salmonella typhimurium (strain SL1344) OX=216597 GN=SL1344_1458 PE=4 SV=1	1	3	3	3	2	2	2	0	0	0	0	0	0	0	0	0	0	0	0	0	0	0	0	0	0	0	0	0	0	0	0	1	0	0	0	0	0	0	0	0	0	0	0	0
A0A0H3ND26	A0A0H3ND26	35	35	35	tr|A0A0H3ND26|A0A0H3ND26_SALTS Dehydratase OS=Salmonella typhimurium (strain SL1344) OX=216597 GN=rfbH PE=3 SV=1	1	35	35	35	29	32	32	31	31	27	24	27	19	18	17	8	12	4	3	1	0	0	0	0	0	6	9	21	31	19	14	13	10	12	7	6	8	4	1	1	3	1	2	0
A0A0H3ND28	A0A0H3ND28	4	4	4	tr|A0A0H3ND28|A0A0H3ND28_SALTS Hydrogenase-1 operon protein HyaE2 OS=Salmonella typhimurium (strain SL1344) OX=216597 GN=hyaE2 PE=4 SV=1	1	4	4	4	4	4	1	0	0	0	0	0	0	0	0	0	0	0	0	0	0	0	0	0	0	0	0	0	0	0	0	0	0	0	0	0	0	0	0	0	0	0	0	0
A0A0H3ND30;A0A0H3NHU9	A0A0H3ND30	19;1	19;1	19;1	tr|A0A0H3ND30|A0A0H3ND30_SALTS Glucose-1-phosphate thymidylyltransferase OS=Salmonella typhimurium (strain SL1344) OX=216597 GN=rfbA PE=3 SV=1	2	19	19	19	14	17	16	13	10	8	6	5	5	2	2	1	1	0	0	0	0	0	0	0	1	5	6	7	14	5	5	5	4	1	1	1	1	1	0	0	0	0	0	0
A0A0H3ND31	A0A0H3ND31	1	1	1	tr|A0A0H3ND31|A0A0H3ND31_SALTS Uncharacterized protein OS=Salmonella typhimurium (strain SL1344) OX=216597 GN=sciH PE=4 SV=1	1	1	1	1	1	1	1	1	1	1	1	1	1	1	1	1	0	0	0	0	0	0	0	0	0	0	1	1	1	1	1	1	1	1	1	1	1	1	1	0	0	0	0	0
A0A0H3ND32	A0A0H3ND32	3	3	3	tr|A0A0H3ND32|A0A0H3ND32_SALTS Uptake hydrogenase small subunit OS=Salmonella typhimurium (strain SL1344) OX=216597 GN=hyaA2 PE=4 SV=1	1	3	3	3	1	1	1	1	1	0	2	3	1	1	0	0	0	0	0	0	0	0	0	0	2	0	0	0	1	0	0	0	0	0	0	0	0	0	0	0	0	0	0	0
A0A0H3ND34	A0A0H3ND34	9	9	9	tr|A0A0H3ND34|A0A0H3ND34_SALTS Predicted bacteriophage protein OS=Salmonella typhimurium (strain SL1344) OX=216597 GN=SL1344_1967 PE=4 SV=1	1	9	9	9	9	8	2	1	1	1	1	0	1	0	0	0	0	0	0	0	0	0	0	0	0	0	0	1	3	0	0	0	0	0	0	0	0	0	0	0	0	0	0	0
A0A0H3ND37	A0A0H3ND37	1	1	1	tr|A0A0H3ND37|A0A0H3ND37_SALTS Hypothetical bacteriophage protein OS=Salmonella typhimurium (strain SL1344) OX=216597 GN=SL1344_1972 PE=4 SV=1	1	1	1	1	1	0	0	0	0	0	0	0	0	0	0	0	0	0	0	0	0	0	0	0	0	0	0	0	0	0	0	0	0	0	0	0	0	0	0	0	0	0	0	0
A0A0H3ND40	A0A0H3ND40	2	2	2	tr|A0A0H3ND40|A0A0H3ND40_SALTS Uncharacterized protein OS=Salmonella typhimurium (strain SL1344) OX=216597 GN=SL1344_1478 PE=4 SV=1	1	2	2	2	2	2	2	0	0	0	0	0	0	0	0	0	0	0	0	0	0	0	0	0	0	0	0	0	1	0	0	0	0	0	0	0	0	0	0	0	0	0	0	0
A0A0H3ND42	A0A0H3ND42	7	7	7	tr|A0A0H3ND42|A0A0H3ND42_SALTS Protein MtfA OS=Salmonella typhimurium (strain SL1344) OX=216597 GN=yeeI PE=3 SV=1	1	7	7	7	5	5	5	4	3	0	1	0	0	0	0	0	0	0	0	0	0	0	0	0	0	1	3	2	6	1	0	0	0	0	0	0	0	0	0	0	0	0	0	0
A0A0H3ND45	A0A0H3ND45	16	16	16	tr|A0A0H3ND45|A0A0H3ND45_SALTS Uncharacterized protein OS=Salmonella typhimurium (strain SL1344) OX=216597 GN=SL1344_1484 PE=4 SV=1	1	16	16	16	0	1	1	0	0	3	8	11	11	11	6	3	3	3	3	1	1	1	0	0	5	0	0	0	0	0	0	0	0	1	2	1	1	1	0	0	0	1	1	2
A0A0H3ND48	A0A0H3ND48	13	13	13	tr|A0A0H3ND48|A0A0H3ND48_SALTS Hypothetical hydrolase OS=Salmonella typhimurium (strain SL1344) OX=216597 GN=SL1344_1489 PE=4 SV=1	1	13	13	13	0	9	8	3	1	1	0	1	1	1	0	0	0	0	0	0	0	0	0	0	0	0	0	0	7	1	1	0	0	0	0	0	0	0	0	0	0	0	0	0
A0A0H3ND55	A0A0H3ND55	5	4	4	tr|A0A0H3ND55|A0A0H3ND55_SALTS Formate dehydrogenase, nitrate-inducible, iron-sulfur subunit (Formate dehydrogenase-n beta subunit) (Fdh-n beta subunit) (Anaerobic formate dehydrogenase iron-sulfur subunit) OS=Salmonella typhimurium (strain SL1344) OX=2165	1	5	4	4	0	0	0	0	0	1	1	1	1	0	0	0	0	0	0	0	0	0	0	0	4	0	0	0	0	0	0	0	0	0	0	0	0	0	0	0	0	0	0	0
A0A0H3ND56	A0A0H3ND56	9	9	9	tr|A0A0H3ND56|A0A0H3ND56_SALTS Hypothetical outer membrane assembly protein OS=Salmonella typhimurium (strain SL1344) OX=216597 GN=asmA PE=4 SV=1	1	9	9	9	0	0	0	0	0	0	0	0	0	0	0	0	0	0	0	0	0	0	0	0	4	0	0	0	0	0	0	0	0	0	0	0	0	0	0	0	0	0	0	0
A0A0H3ND59	A0A0H3ND59	7	7	7	tr|A0A0H3ND59|A0A0H3ND59_SALTS Uncharacterized protein OS=Salmonella typhimurium (strain SL1344) OX=216597 GN=yegD PE=4 SV=1	1	7	7	7	0	0	0	0	0	2	4	6	6	2	3	0	0	0	0	0	0	0	0	0	0	0	0	0	0	0	0	1	1	1	1	1	0	0	0	0	0	0	0	0
A0A0H3ND61	A0A0H3ND61	6	6	6	tr|A0A0H3ND61|A0A0H3ND61_SALTS Precorrin-3 C17-methyltransferase OS=Salmonella typhimurium (strain SL1344) OX=216597 GN=cbiH PE=4 SV=1	1	6	6	6	5	4	3	2	1	3	3	3	3	3	3	0	0	0	0	0	0	0	0	0	0	0	2	2	2	0	0	0	0	0	0	0	0	0	0	0	0	0	0	0
A0A0H3ND63	A0A0H3ND63	1	1	1	tr|A0A0H3ND63|A0A0H3ND63_SALTS L-asparagine permease OS=Salmonella typhimurium (strain SL1344) OX=216597 GN=ansP PE=4 SV=1	1	1	1	1	0	0	0	0	0	0	0	0	0	0	0	0	0	0	0	0	0	0	0	0	1	0	0	0	0	0	0	0	0	0	0	0	0	0	0	0	0	0	0	0
A0A0H3ND64	A0A0H3ND64	7	7	7	tr|A0A0H3ND64|A0A0H3ND64_SALTS Cobalt-precorrin-5B C(1)-methyltransferase OS=Salmonella typhimurium (strain SL1344) OX=216597 GN=cbiD PE=3 SV=1	1	7	7	7	0	1	1	4	1	2	1	1	0	0	0	0	0	0	0	0	0	0	0	0	0	0	0	0	1	2	2	1	0	0	0	0	0	0	0	0	0	0	0	0
A0A0H3ND65	A0A0H3ND65	9	9	9	tr|A0A0H3ND65|A0A0H3ND65_SALTS Hypothetical NADP-dependent oxidoreductase OS=Salmonella typhimurium (strain SL1344) OX=216597 GN=yncB PE=4 SV=1	1	9	9	9	5	6	6	6	3	2	1	0	0	0	0	0	0	0	0	0	0	0	0	0	0	1	3	4	6	3	4	2	1	0	0	0	0	0	0	0	0	0	0	0
A0A0H3ND66	A0A0H3ND66	18	18	18	tr|A0A0H3ND66|A0A0H3ND66_SALTS Hypothetical protease OS=Salmonella typhimurium (strain SL1344) OX=216597 GN=yegQ PE=4 SV=1	1	18	18	18	3	14	15	13	12	8	5	2	2	1	0	0	0	0	0	0	0	0	0	0	0	1	2	3	9	3	3	2	1	0	1	0	0	0	0	0	0	0	0	0
A0A0H3ND68	A0A0H3ND68	35	35	35	tr|A0A0H3ND68|A0A0H3ND68_SALTS Virulence protein OS=Salmonella typhimurium (strain SL1344) OX=216597 GN=srfB PE=4 SV=1	1	35	35	35	0	19	25	20	18	10	8	3	3	1	0	0	0	0	0	0	0	0	0	0	2	3	0	5	21	7	5	5	2	1	0	0	0	0	0	0	0	0	0	0
A0A0H3ND69	A0A0H3ND69	2	2	2	tr|A0A0H3ND69|A0A0H3ND69_SALTS Probable lipid kinase YegS OS=Salmonella typhimurium (strain SL1344) OX=216597 GN=yegS PE=3 SV=1	1	2	2	2	1	1	0	0	0	0	0	0	0	0	0	0	0	0	0	0	0	0	0	0	0	0	0	0	0	0	0	0	0	0	0	0	0	0	0	0	0	0	0	0
A0A0H3ND71	A0A0H3ND71	15	15	15	tr|A0A0H3ND71|A0A0H3ND71_SALTS Diol dehydratase small subunit OS=Salmonella typhimurium (strain SL1344) OX=216597 GN=pduE PE=4 SV=1	1	15	15	15	6	6	10	12	10	7	11	7	3	2	0	0	0	0	0	0	0	0	0	0	2	0	0	0	7	1	1	2	1	1	0	0	0	0	0	0	0	0	0	0
A0A0H3ND72	A0A0H3ND72	13	13	13	tr|A0A0H3ND72|A0A0H3ND72_SALTS D-alanyl-D-alanine dipeptidase OS=Salmonella typhimurium (strain SL1344) OX=216597 GN=pdgL PE=3 SV=1	1	13	13	13	11	11	10	6	5	4	3	1	1	2	1	1	1	0	0	0	0	0	0	0	0	3	4	5	9	4	3	1	0	1	1	1	0	0	0	0	0	0	0	0
A0A0H3ND73	A0A0H3ND73	5	5	5	tr|A0A0H3ND73|A0A0H3ND73_SALTS Uncharacterized protein OS=Salmonella typhimurium (strain SL1344) OX=216597 GN=sciX PE=4 SV=1	1	5	5	5	4	3	0	0	0	1	0	0	0	0	0	0	0	0	0	0	0	0	0	0	0	0	0	0	0	0	0	0	0	0	0	0	0	0	0	0	0	0	0	0
A0A0H3ND74	A0A0H3ND74	4	4	4	tr|A0A0H3ND74|A0A0H3ND74_SALTS Hypothetical gntR-family transcriptional regulator OS=Salmonella typhimurium (strain SL1344) OX=216597 GN=yegW PE=4 SV=1	1	4	4	4	1	1	2	2	1	1	1	0	1	0	0	0	0	0	0	0	0	0	0	0	0	1	0	0	1	0	1	1	0	0	0	0	0	0	0	0	0	0	0	0
A0A0H3ND75	A0A0H3ND75	13	13	13	tr|A0A0H3ND75|A0A0H3ND75_SALTS Hypothetical peptidase OS=Salmonella typhimurium (strain SL1344) OX=216597 GN=ydcP PE=4 SV=1	1	13	13	13	4	9	7	3	3	1	1	1	2	1	2	1	0	1	0	0	0	0	0	0	0	1	0	0	1	0	0	0	0	0	0	0	0	0	0	0	0	0	1	0
A0A0H3ND76	A0A0H3ND76	4	4	4	tr|A0A0H3ND76|A0A0H3ND76_SALTS Phosphate propanoyltransferase OS=Salmonella typhimurium (strain SL1344) OX=216597 GN=pduL PE=3 SV=1	1	4	4	4	1	2	1	1	0	0	0	0	0	0	0	0	0	0	0	0	0	0	0	0	0	0	0	0	2	0	0	0	0	0	0	0	0	0	0	0	0	0	0	0
A0A0H3ND78	A0A0H3ND78	3	3	3	tr|A0A0H3ND78|A0A0H3ND78_SALTS Hypothetical propanol dehydrogenase OS=Salmonella typhimurium (strain SL1344) OX=216597 GN=pduQ PE=4 SV=1	1	3	3	3	0	0	0	1	2	1	1	1	0	1	0	0	0	0	0	0	0	0	0	0	1	1	0	0	0	0	0	0	0	0	0	0	0	0	0	0	0	0	0	0
A0A0H3ND82	A0A0H3ND82	45	45	45	tr|A0A0H3ND82|A0A0H3ND82_SALTS Methionine--tRNA ligase OS=Salmonella typhimurium (strain SL1344) OX=216597 GN=metG PE=3 SV=1	1	45	45	45	4	32	37	32	33	30	25	16	13	11	9	1	3	0	0	0	0	0	0	0	0	9	4	13	34	12	9	7	5	5	5	2	1	2	1	1	2	0	0	0
A0A0H3ND83	A0A0H3ND83	3	3	3	tr|A0A0H3ND83|A0A0H3ND83_SALTS Aminoglycoside N(6)-acetyltransferase type 1 OS=Salmonella typhimurium (strain SL1344) OX=216597 GN=aac PE=4 SV=1	1	3	3	3	3	3	3	0	0	0	0	0	0	0	0	0	0	0	0	0	0	0	0	0	0	0	0	0	1	0	0	0	0	0	0	0	0	0	0	0	0	0	0	0
A0A0H3ND87	A0A0H3ND87	15	15	15	tr|A0A0H3ND87|A0A0H3ND87_SALTS Uncharacterized protein OS=Salmonella typhimurium (strain SL1344) OX=216597 GN=SL1344_1554 PE=4 SV=1	1	15	15	15	11	12	9	8	5	2	3	1	0	0	0	0	0	0	0	0	0	0	0	0	0	1	2	3	10	2	0	0	0	0	0	0	0	0	0	0	0	0	0	0
A0A0H3ND89	A0A0H3ND89	24	24	24	tr|A0A0H3ND89|A0A0H3ND89_SALTS Exodeoxyribonuclease I OS=Salmonella typhimurium (strain SL1344) OX=216597 GN=sbcB PE=4 SV=1	1	24	24	24	15	18	19	14	11	10	8	5	5	3	2	2	0	0	0	0	0	0	0	0	0	1	2	3	17	5	1	2	2	1	1	1	0	0	0	0	0	0	0	0
A0A0H3ND92	A0A0H3ND92	15	15	15	tr|A0A0H3ND92|A0A0H3ND92_SALTS Hypothetical periplasmic protein OS=Salmonella typhimurium (strain SL1344) OX=216597 GN=yehZ PE=4 SV=1	1	15	15	15	13	14	11	6	5	3	2	2	0	0	0	0	0	0	0	0	0	0	0	0	0	3	3	4	4	3	3	3	2	0	0	0	0	0	0	0	0	0	0	0
A0A0H3ND93	A0A0H3ND93	16	16	16	tr|A0A0H3ND93|A0A0H3ND93_SALTS Histidinol dehydrogenase OS=Salmonella typhimurium (strain SL1344) OX=216597 GN=hisD PE=3 SV=1	1	16	16	16	9	13	12	12	12	10	8	7	3	2	1	0	0	0	0	0	0	0	0	0	0	2	3	5	13	5	3	2	1	0	0	0	0	0	0	0	0	0	0	0
A0A0H3ND95	A0A0H3ND95	8	8	8	tr|A0A0H3ND95|A0A0H3ND95_SALTS Probable secreted protein (SPI-6 associated) OS=Salmonella typhimurium (strain SL1344) OX=216597 GN=sciZ PE=1 SV=1	1	8	8	8	8	7	7	5	1	0	1	0	1	0	0	0	0	0	0	0	0	0	0	0	0	1	1	0	4	0	0	0	0	0	0	0	0	0	0	0	0	0	0	0
A0A0H3ND98	A0A0H3ND98	15	15	15	tr|A0A0H3ND98|A0A0H3ND98_SALTS Imidazole glycerol phosphate synthase subunit HisF OS=Salmonella typhimurium (strain SL1344) OX=216597 GN=hisF PE=3 SV=1	1	15	15	15	15	15	12	7	7	4	5	1	1	1	1	0	0	0	0	0	0	0	0	0	0	1	4	4	9	1	1	1	1	1	1	0	0	1	0	0	1	0	0	0
A0A0H3NDA2	A0A0H3NDA2	4	4	4	tr|A0A0H3NDA2|A0A0H3NDA2_SALTS Hypothetical secreted protein OS=Salmonella typhimurium (strain SL1344) OX=216597 GN=ydbL PE=4 SV=1	1	4	4	4	4	2	0	0	0	0	0	0	0	0	0	0	0	0	0	0	0	0	0	0	0	0	0	0	0	0	0	0	0	0	0	0	0	0	0	0	0	0	0	0
A0A0H3NDA3	A0A0H3NDA3	4	4	4	tr|A0A0H3NDA3|A0A0H3NDA3_SALTS Undecaprenyl-phosphate galactosephosphotransferase OS=Salmonella typhimurium (strain SL1344) OX=216597 GN=rfbP PE=4 SV=1	1	4	4	4	0	0	0	0	0	0	0	0	0	0	0	0	0	0	0	0	0	0	0	0	3	0	0	0	0	0	0	0	0	0	0	0	0	0	0	0	0	0	0	0
A0A0H3NDA5	A0A0H3NDA5	26	26	26	tr|A0A0H3NDA5|A0A0H3NDA5_SALTS Esterase FrsA OS=Salmonella typhimurium (strain SL1344) OX=216597 GN=frsA PE=3 SV=1	1	26	26	26	20	23	21	13	9	5	3	3	1	1	1	1	1	0	0	0	0	1	1	1	1	3	4	7	18	2	1	1	1	0	1	1	1	1	1	1	1	1	1	1
A0A0H3NDA8	A0A0H3NDA8	11	11	11	tr|A0A0H3NDA8|A0A0H3NDA8_SALTS Glycosyltransferase OS=Salmonella typhimurium (strain SL1344) OX=216597 GN=rfbV PE=4 SV=1	1	11	11	11	0	0	1	1	1	1	3	3	2	1	2	1	1	0	0	0	0	1	0	0	7	0	0	0	0	0	0	0	0	0	0	0	0	0	1	0	0	0	0	0
A0A0H3NDB1	A0A0H3NDB1	13	13	13	tr|A0A0H3NDB1|A0A0H3NDB1_SALTS tRNA-cytidine(32) 2-sulfurtransferase OS=Salmonella typhimurium (strain SL1344) OX=216597 GN=ydaO PE=3 SV=1	1	13	13	13	10	10	9	7	6	4	3	3	1	2	1	0	0	0	0	0	0	0	0	0	0	2	2	2	9	2	2	0	0	0	0	0	0	0	0	0	0	0	0	0
A0A0H3NDB2	A0A0H3NDB2	16	16	16	tr|A0A0H3NDB2|A0A0H3NDB2_SALTS Glucose-1-phosphate cytidylyltransferase OS=Salmonella typhimurium (strain SL1344) OX=216597 GN=rfbF PE=4 SV=1	1	16	16	16	2	8	11	11	12	12	10	9	9	6	4	0	2	0	0	0	0	0	0	0	0	1	1	3	13	6	5	4	4	3	2	1	1	0	0	0	0	0	0	0
A0A0H3NDB3	A0A0H3NDB3	21	21	21	tr|A0A0H3NDB3|A0A0H3NDB3_SALTS Hypothetical oxidoreductase OS=Salmonella typhimurium (strain SL1344) OX=216597 GN=SL1344_2163 PE=4 SV=1	1	21	21	21	3	4	10	14	14	10	8	4	1	2	2	0	0	0	0	0	0	0	0	0	0	1	0	1	11	4	6	6	4	0	0	0	0	0	0	0	0	0	0	0
A0A0H3NDB4	A0A0H3NDB4	8	8	8	tr|A0A0H3NDB4|A0A0H3NDB4_SALTS Methylated-DNA--protein-cysteine methyltransferase OS=Salmonella typhimurium (strain SL1344) OX=216597 GN=ogt PE=3 SV=1	1	8	8	8	1	1	1	1	1	0	5	8	7	6	4	1	0	0	0	0	0	0	0	0	0	0	1	1	1	1	0	0	1	1	1	1	1	1	1	1	0	0	0	0
A0A0H3NDB6	A0A0H3NDB6	4	4	4	tr|A0A0H3NDB6|A0A0H3NDB6_SALTS Conserved hypothetical DNA-binding protein OS=Salmonella typhimurium (strain SL1344) OX=216597 GN=SL1344_1595 PE=4 SV=1	1	4	4	4	2	3	1	0	0	0	0	0	0	0	0	0	0	0	0	0	0	0	0	0	0	0	1	0	2	0	0	0	0	0	0	0	0	0	0	0	0	0	0	0
A0A0H3NDB7	A0A0H3NDB7	11	11	11	tr|A0A0H3NDB7|A0A0H3NDB7_SALTS Mgl repressor and galactose ultrainduction factor OS=Salmonella typhimurium (strain SL1344) OX=216597 GN=galS PE=4 SV=1	1	11	11	11	8	8	2	2	1	1	0	0	0	0	0	0	0	0	0	0	0	0	0	0	0	2	3	3	3	2	2	1	0	0	0	0	0	0	0	0	0	0	0	0
A0A0H3NDB8	A0A0H3NDB8	24	24	22	tr|A0A0H3NDB8|A0A0H3NDB8_SALTS dTDP-glucose 4,6-dehydratase OS=Salmonella typhimurium (strain SL1344) OX=216597 GN=rfbB PE=3 SV=1	1	24	24	22	15	23	19	17	17	11	9	7	4	0	0	0	0	0	0	0	0	0	0	0	0	2	5	7	19	6	6	5	3	1	0	0	0	0	0	0	0	0	0	0
A0A0H3NDC3	A0A0H3NDC3	10	10	10	tr|A0A0H3NDC3|A0A0H3NDC3_SALTS Hypothetical oxidoreductase OS=Salmonella typhimurium (strain SL1344) OX=216597 GN=SL1344_1606 PE=4 SV=1	1	10	10	10	5	7	6	3	3	1	0	0	0	0	0	0	0	0	0	0	0	0	0	0	0	0	1	2	4	1	0	0	0	0	0	0	0	0	0	0	0	0	0	0
A0A0H3NDC4	A0A0H3NDC4	8	8	8	tr|A0A0H3NDC4|A0A0H3NDC4_SALTS Hypothetical transcriptional regulator OS=Salmonella typhimurium (strain SL1344) OX=216597 GN=yeiE PE=4 SV=1	1	8	8	8	4	6	4	2	3	0	1	1	1	0	0	0	0	0	0	0	0	0	0	0	2	4	0	1	3	0	0	0	0	0	0	0	0	0	0	0	0	0	0	0
A0A0H3NDC6	A0A0H3NDC6	9	9	9	tr|A0A0H3NDC6|A0A0H3NDC6_SALTS Hypothetical mandelate racemase / muconate lactonizing enzyme family protein OS=Salmonella typhimurium (strain SL1344) OX=216597 GN=ycjG PE=3 SV=1	1	9	9	9	6	7	7	4	3	1	2	0	0	0	0	0	0	0	0	0	0	0	0	0	0	1	3	3	5	2	1	1	1	0	0	0	0	0	0	0	0	0	0	0
A0A0H3NDC8	A0A0H3NDC8	15	15	15	tr|A0A0H3NDC8|A0A0H3NDC8_SALTS Pts system, fructose-specific IIA/FPR component OS=Salmonella typhimurium (strain SL1344) OX=216597 GN=fruB PE=4 SV=1	1	15	15	15	14	8	7	6	3	2	2	1	1	0	0	0	0	0	0	0	0	0	0	0	2	0	3	3	4	0	0	0	0	0	0	0	0	0	0	0	0	0	0	0
A0A0H3NDC9	A0A0H3NDC9	3	3	3	tr|A0A0H3NDC9|A0A0H3NDC9_SALTS Bacteriophage shock protein E OS=Salmonella typhimurium (strain SL1344) OX=216597 GN=pspE PE=4 SV=1	1	3	3	3	3	3	3	3	2	2	1	1	1	1	1	0	0	0	0	0	0	1	1	0	0	1	1	1	2	1	1	1	1	0	0	0	0	0	0	0	0	0	0	1
A0A0H3NDD3	A0A0H3NDD3	13	13	13	tr|A0A0H3NDD3|A0A0H3NDD3_SALTS Elongation factor P-like protein OS=Salmonella typhimurium (strain SL1344) OX=216597 GN=yeiP PE=3 SV=1	1	13	13	13	13	9	6	4	3	3	3	2	2	0	1	0	0	0	0	0	0	0	0	0	0	2	5	4	6	3	3	2	2	2	2	2	2	1	1	0	0	0	0	0
A0A0H3NDD4	A0A0H3NDD4	2	2	2	tr|A0A0H3NDD4|A0A0H3NDD4_SALTS Psp operon transcriptional activator PspF OS=Salmonella typhimurium (strain SL1344) OX=216597 GN=pspF PE=4 SV=1	1	2	2	2	0	0	1	1	1	1	1	1	0	0	0	0	0	0	0	0	0	0	0	0	0	0	0	0	1	0	0	0	0	0	0	0	0	0	0	0	0	0	0	0
A0A0H3NDD6	A0A0H3NDD6	14	14	14	tr|A0A0H3NDD6|A0A0H3NDD6_SALTS Hypothetical transport system periplasmic binding protein OS=Salmonella typhimurium (strain SL1344) OX=216597 GN=yejA PE=4 SV=1	1	14	14	14	3	11	9	6	4	0	1	0	0	1	0	0	0	0	0	0	0	0	0	0	0	1	1	3	7	1	0	0	0	0	0	0	0	0	0	0	0	0	0	0
A0A0H3NDD7	A0A0H3NDD7	3	3	3	tr|A0A0H3NDD7|A0A0H3NDD7_SALTS Peptide transport system ATP-binding protein SapF OS=Salmonella typhimurium (strain SL1344) OX=216597 GN=sapF PE=4 SV=1	1	3	3	3	0	0	0	0	0	0	0	0	0	0	0	0	0	0	0	0	0	0	1	1	1	0	0	0	0	0	0	0	0	1	1	0	0	0	0	0	0	0	0	1
A0A0H3NDE2	A0A0H3NDE2	16	16	16	tr|A0A0H3NDE2|A0A0H3NDE2_SALTS Enoyl-[acyl-carrier-protein] reductase [NADH] OS=Salmonella typhimurium (strain SL1344) OX=216597 GN=fabI PE=3 SV=1	1	16	16	16	13	14	15	14	14	14	16	13	12	10	9	4	4	1	0	0	0	0	0	0	3	8	4	8	15	9	9	6	5	5	4	4	3	3	3	3	3	0	1	0
A0A0H3NDE3	A0A0H3NDE3	11	11	11	tr|A0A0H3NDE3|A0A0H3NDE3_SALTS Uridine kinase OS=Salmonella typhimurium (strain SL1344) OX=216597 GN=udk PE=3 SV=1	1	11	11	11	9	8	6	4	4	2	1	3	3	1	1	1	0	0	1	1	1	1	0	0	1	0	1	2	9	0	1	1	1	1	1	0	0	0	0	0	0	0	0	0
A0A0H3NDE7	A0A0H3NDE7	18	18	18	tr|A0A0H3NDE7|A0A0H3NDE7_SALTS Nucleoid-associated protein YejK OS=Salmonella typhimurium (strain SL1344) OX=216597 GN=yejK PE=3 SV=1	1	18	18	18	0	4	8	11	14	15	13	14	12	11	10	5	5	3	3	1	0	0	0	0	0	4	1	4	7	6	9	10	11	11	10	9	8	7	3	2	2	1	1	0
A0A0H3NDE9	A0A0H3NDE9	20	20	20	tr|A0A0H3NDE9|A0A0H3NDE9_SALTS Hypothetical regulatory protein OS=Salmonella typhimurium (strain SL1344) OX=216597 GN=yciT PE=4 SV=1	1	20	20	20	3	4	5	7	11	13	13	13	12	7	5	4	2	0	0	0	0	0	0	0	0	1	2	1	4	5	7	7	11	11	8	4	3	2	1	1	0	0	0	0
A0A0H3NDF2	A0A0H3NDF2	6	6	6	tr|A0A0H3NDF2|A0A0H3NDF2_SALTS Hypothetical lipopolysaccharide modification acyltransferase OS=Salmonella typhimurium (strain SL1344) OX=216597 GN=oafA PE=4 SV=1	1	6	6	6	0	0	0	0	0	0	0	0	0	0	0	0	0	0	1	1	1	1	0	0	5	0	0	0	0	0	0	0	0	0	0	0	0	0	0	0	0	0	0	0
A0A0H3NDF6	A0A0H3NDF6	23	23	23	tr|A0A0H3NDF6|A0A0H3NDF6_SALTS Delta-aminolevulinic acid dehydratase OS=Salmonella typhimurium (strain SL1344) OX=216597 GN=hemB PE=3 SV=1	1	23	23	23	0	0	4	18	19	19	20	17	15	7	4	0	1	0	0	0	0	0	0	0	0	0	0	0	2	9	11	12	11	11	8	4	1	0	0	0	0	0	0	0
A0A0H3NDG1	A0A0H3NDG1	2	2	2	tr|A0A0H3NDG1|A0A0H3NDG1_SALTS Hydroxyethylthiazole kinase OS=Salmonella typhimurium (strain SL1344) OX=216597 GN=thiM PE=3 SV=1	1	2	2	2	0	2	1	0	0	0	0	0	0	0	0	0	0	0	0	0	0	0	0	0	0	0	0	0	0	0	0	0	0	0	0	0	0	0	0	0	0	0	0	0
A0A0H3NDG3	A0A0H3NDG3	62	62	62	tr|A0A0H3NDG3|A0A0H3NDG3_SALTS DNA topoisomerase 1 OS=Salmonella typhimurium (strain SL1344) OX=216597 GN=topA PE=3 SV=1	1	62	62	62	1	2	11	28	37	43	49	43	45	45	43	21	26	14	13	7	3	2	1	0	4	2	0	0	4	5	14	18	18	17	15	14	13	12	10	10	5	1	1	5
A0A0H3NDG4	A0A0H3NDG4	5	5	5	tr|A0A0H3NDG4|A0A0H3NDG4_SALTS Hypothetical fimbrial subunit protein OS=Salmonella typhimurium (strain SL1344) OX=216597 GN=stcA PE=4 SV=1	1	5	5	5	5	3	2	1	0	0	0	0	0	0	0	0	0	0	0	0	0	0	0	0	0	1	2	1	1	0	0	0	1	0	0	0	0	0	0	0	0	0	0	0
A0A0H3NHM3;A0A0H3NDG6	A0A0H3NHM3;A0A0H3NDG6	2;2	2;2	2;2	tr|A0A0H3NHM3|A0A0H3NHM3_SALTS Cytochrome c-type biogenesis protein CcmE OS=Salmonella typhimurium (strain SL1344) OX=216597 GN=ccmE1 PE=3 SV=1;tr|A0A0H3NDG6|A0A0H3NDG6_SALTS Cytochrome c-type biogenesis protein CcmE OS=Salmonella typhimurium (strain SL134	2	2	2	2	1	0	0	0	0	0	0	0	0	0	0	0	0	0	0	0	0	0	0	0	2	0	0	0	0	0	0	0	0	0	0	0	0	0	0	0	0	0	0	0
A0A0H3NDG8	A0A0H3NDG8	3	3	3	tr|A0A0H3NDG8|A0A0H3NDG8_SALTS UPF0178 protein YaiI OS=Salmonella typhimurium (strain SL1344) OX=216597 GN=yaiI PE=3 SV=1	1	3	3	3	2	1	1	0	1	1	1	1	1	0	0	0	0	0	0	0	0	0	0	0	0	0	1	1	1	0	0	0	0	0	0	0	0	0	0	0	0	0	0	0
A0A0H3NDH0	A0A0H3NDH0	12	12	12	tr|A0A0H3NDH0|A0A0H3NDH0_SALTS Pseudouridine synthase OS=Salmonella typhimurium (strain SL1344) OX=216597 GN=yciL PE=3 SV=1	1	12	12	12	1	1	2	3	8	8	7	7	5	3	3	1	0	0	0	0	0	0	0	0	4	1	0	0	1	1	2	2	4	4	4	4	4	0	0	0	0	0	0	0
A0A0H3NDH2	A0A0H3NDH2	16	16	16	tr|A0A0H3NDH2|A0A0H3NDH2_SALTS Recombination-associated protein RdgC OS=Salmonella typhimurium (strain SL1344) OX=216597 GN=rdgC PE=3 SV=1	1	16	16	16	4	5	6	7	11	10	11	11	12	9	6	1	2	1	0	0	0	0	0	0	0	1	1	1	2	3	7	7	7	6	5	4	3	3	2	1	0	0	0	0
A0A0H3NDH3	A0A0H3NDH3	2	2	2	tr|A0A0H3NDH3|A0A0H3NDH3_SALTS Periplasmic nitrate reductase, electron transfer subunit OS=Salmonella typhimurium (strain SL1344) OX=216597 GN=napB PE=3 SV=1	1	2	2	2	2	2	2	2	2	0	1	1	0	0	0	0	0	0	0	0	0	0	0	0	0	0	0	0	1	0	0	0	0	0	0	0	0	0	0	0	0	0	0	0
A0A0H3NDH4	A0A0H3NDH4	37	37	37	tr|A0A0H3NDH4|A0A0H3NDH4_SALTS Quinone-dependent D-lactate dehydrogenase OS=Salmonella typhimurium (strain SL1344) OX=216597 GN=dld PE=3 SV=1	1	37	37	37	9	16	20	23	25	23	23	22	20	17	15	2	13	2	3	2	2	7	2	0	5	4	0	4	18	7	8	8	8	7	5	5	5	3	2	1	1	1	1	5
A0A0H3NDH6	A0A0H3NDH6	8	8	8	tr|A0A0H3NDH6|A0A0H3NDH6_SALTS Phosphate regulon transcriptional regulatory protein PhoB OS=Salmonella typhimurium (strain SL1344) OX=216597 GN=phoB PE=4 SV=1	1	8	8	8	7	6	1	0	0	0	0	0	0	0	0	0	0	0	0	0	0	0	0	0	0	1	1	1	1	0	0	0	0	0	0	0	0	0	0	0	0	0	0	0
A0A0H3NDH7	A0A0H3NDH7	7	7	7	tr|A0A0H3NDH7|A0A0H3NDH7_SALTS Multifunctional fusion protein OS=Salmonella typhimurium (strain SL1344) OX=216597 GN=trpC PE=3 SV=1	1	7	7	7	5	5	3	1	0	0	0	0	0	0	0	0	0	0	0	0	0	0	0	0	0	0	0	0	1	0	0	0	0	0	0	0	0	0	0	0	0	0	0	0
A0A0H3NDH9	A0A0H3NDH9	5	5	5	tr|A0A0H3NDH9|A0A0H3NDH9_SALTS Ferredoxin-type protein NapF OS=Salmonella typhimurium (strain SL1344) OX=216597 GN=napF PE=3 SV=1	1	5	5	5	1	1	2	0	0	0	3	3	4	2	0	0	0	0	0	0	0	0	0	0	0	0	0	0	0	0	0	0	1	2	2	1	0	0	0	0	0	0	0	0
A0A0H3NDI1	A0A0H3NDI1	15	15	15	tr|A0A0H3NDI1|A0A0H3NDI1_SALTS Alkyl hydroperoxide reductase OS=Salmonella typhimurium (strain SL1344) OX=216597 GN=tsaA PE=4 SV=1	1	15	15	15	13	13	14	14	14	13	11	12	10	9	9	2	3	1	1	1	0	0	0	0	3	6	7	11	14	12	8	8	8	7	5	4	4	2	2	1	1	1	1	1
A0A0H3NDI2	A0A0H3NDI2	8	8	8	tr|A0A0H3NDI2|A0A0H3NDI2_SALTS Uncharacterized protein OS=Salmonella typhimurium (strain SL1344) OX=216597 GN=yciE PE=4 SV=1	1	8	8	8	5	5	1	1	1	1	1	0	0	0	0	0	0	0	0	0	0	0	0	0	0	1	1	0	1	0	0	0	0	0	0	0	0	0	0	0	0	0	0	0
A0A0H3NDI3	A0A0H3NDI3	5	5	5	tr|A0A0H3NDI3|A0A0H3NDI3_SALTS Hypothetical gentisate 1,2-dioxygenase OS=Salmonella typhimurium (strain SL1344) OX=216597 GN=SL1344_2155 PE=4 SV=1	1	5	5	5	0	0	4	0	1	0	0	0	0	0	0	0	0	0	0	0	0	0	0	0	0	0	0	0	2	1	1	0	0	0	0	0	0	0	0	0	0	0	0	0
A0A0H3NDI5	A0A0H3NDI5	6	6	6	tr|A0A0H3NDI5|A0A0H3NDI5_SALTS FAD:protein FMN transferase OS=Salmonella typhimurium (strain SL1344) OX=216597 GN=apbE PE=3 SV=1	1	6	6	6	0	0	0	0	0	0	0	0	0	0	0	0	0	0	0	0	0	0	0	0	4	0	0	0	0	0	0	0	1	0	0	0	0	0	0	0	0	0	0	0
A0A0H3NDI7	A0A0H3NDI7	12	12	12	tr|A0A0H3NDI7|A0A0H3NDI7_SALTS Cytidine deaminase OS=Salmonella typhimurium (strain SL1344) OX=216597 GN=cdd PE=3 SV=1	1	12	12	12	9	12	8	7	8	7	3	1	1	0	0	0	0	0	0	0	0	0	0	0	0	3	5	5	8	4	5	3	2	0	0	0	0	0	0	0	0	0	0	0
A0A0H3NDJ2;A0A0H3NA33	A0A0H3NDJ2	59;1	59;1	59;1	tr|A0A0H3NDJ2|A0A0H3NDJ2_SALTS DNA gyrase subunit A OS=Salmonella typhimurium (strain SL1344) OX=216597 GN=gyrA PE=3 SV=1	2	59	59	59	0	23	45	49	46	40	37	31	23	15	14	1	6	0	0	0	0	0	0	0	0	3	0	3	47	22	19	16	12	6	3	2	0	0	0	1	0	0	0	0
A0A0H3NDJ4	A0A0H3NDJ4	12	12	12	tr|A0A0H3NDJ4|A0A0H3NDJ4_SALTS GTP cyclohydrolase 1 OS=Salmonella typhimurium (strain SL1344) OX=216597 GN=folE PE=3 SV=1	1	12	12	12	4	10	7	6	6	5	4	3	1	1	0	0	0	0	0	0	0	0	0	0	0	1	0	2	8	2	1	1	1	0	0	0	0	0	0	0	0	0	0	0
A0A0H3NDJ5	A0A0H3NDJ5	12	12	12	tr|A0A0H3NDJ5|A0A0H3NDJ5_SALTS Thymidine kinase OS=Salmonella typhimurium (strain SL1344) OX=216597 GN=tdk PE=3 SV=1	1	12	12	12	11	10	7	7	4	3	3	3	3	2	1	0	0	0	0	0	0	0	0	0	0	2	5	4	4	2	2	1	0	0	1	1	0	0	0	0	0	0	0	0
A0A0H3NDJ8	A0A0H3NDJ8	6	6	6	tr|A0A0H3NDJ8|A0A0H3NDJ8_SALTS UPF0225 protein YchJ OS=Salmonella typhimurium (strain SL1344) OX=216597 GN=ychJ PE=3 SV=1	1	6	6	6	6	5	4	0	0	0	0	0	0	0	0	0	0	0	0	0	0	0	0	0	0	0	0	0	2	0	0	0	0	0	0	0	0	0	0	0	0	0	0	0
A0A0H3NDK0	A0A0H3NDK0	12	12	12	tr|A0A0H3NDK0|A0A0H3NDK0_SALTS Probable endonuclease 4 OS=Salmonella typhimurium (strain SL1344) OX=216597 GN=nfo PE=3 SV=1	1	12	12	12	9	8	4	3	2	3	5	6	3	3	1	0	0	0	0	0	0	0	0	0	0	2	6	5	7	3	3	2	3	4	3	4	4	0	0	0	0	0	0	0
A0A0H3NDK1	A0A0H3NDK1	14	14	10	tr|A0A0H3NDK1|A0A0H3NDK1_SALTS Respiratory nitrate reductase 1 beta chain OS=Salmonella typhimurium (strain SL1344) OX=216597 GN=narH PE=4 SV=1	1	14	14	10	3	5	6	6	4	5	9	9	6	8	6	3	2	1	0	0	0	0	0	1	6	0	0	0	0	0	0	0	1	1	1	0	0	0	1	0	0	0	0	0
A0A0H3NDK2	A0A0H3NDK2	51	51	51	tr|A0A0H3NDK2|A0A0H3NDK2_SALTS Ribonucleoside-diphosphate reductase OS=Salmonella typhimurium (strain SL1344) OX=216597 GN=nrdA PE=3 SV=1	1	51	51	51	25	39	46	46	45	40	41	29	19	13	8	3	0	0	0	0	0	0	1	0	1	11	4	14	39	22	19	12	9	7	6	4	2	0	0	0	0	0	0	1
A0A0H3NDK6	A0A0H3NDK6	26	26	26	tr|A0A0H3NDK6|A0A0H3NDK6_SALTS Protein translocase subunit SecD OS=Salmonella typhimurium (strain SL1344) OX=216597 GN=secD PE=3 SV=1	1	26	26	26	1	1	1	2	2	2	2	2	1	1	1	1	2	1	5	2	2	6	4	1	22	2	1	1	1	1	1	1	1	0	0	0	0	0	0	0	0	0	1	1
A0A0H3NDK7	A0A0H3NDK7	1	1	1	tr|A0A0H3NDK7|A0A0H3NDK7_SALTS Lipid A 1-diphosphate synthase OS=Salmonella typhimurium (strain SL1344) OX=216597 GN=yeiU PE=3 SV=1	1	1	1	1	0	0	0	0	0	0	0	0	0	0	0	0	0	0	0	0	0	0	0	0	1	0	0	0	0	0	0	0	0	0	0	0	0	0	0	0	0	0	0	0
A0A0H3NDK9	A0A0H3NDK9	6	6	6	tr|A0A0H3NDK9|A0A0H3NDK9_SALTS Nucleoside-specific channel-forming protein tsx OS=Salmonella typhimurium (strain SL1344) OX=216597 GN=tsx PE=4 SV=1	1	6	6	6	0	0	0	0	1	0	2	2	2	3	3	1	3	0	0	0	0	2	1	0	5	0	0	0	0	0	0	0	0	0	0	0	0	0	0	0	0	0	0	0
A0A0H3NDL1	A0A0H3NDL1	33	33	33	tr|A0A0H3NDL1|A0A0H3NDL1_SALTS Glycerophosphoryl diester phosphodiesterase periplasmic OS=Salmonella typhimurium (strain SL1344) OX=216597 GN=glpQ PE=4 SV=1	1	33	33	33	25	26	26	24	26	25	26	25	25	22	22	13	21	10	10	6	5	3	0	1	3	4	8	12	25	13	8	10	11	9	8	7	5	6	6	5	4	1	2	2
A0A0H3NDL2	A0A0H3NDL2	9	9	9	tr|A0A0H3NDL2|A0A0H3NDL2_SALTS Transcription antitermination protein NusB OS=Salmonella typhimurium (strain SL1344) OX=216597 GN=nusB PE=3 SV=1	1	9	9	9	9	9	9	6	5	3	2	2	1	1	1	0	0	0	0	0	0	0	0	0	1	2	3	3	3	2	1	1	1	1	1	1	0	1	1	1	1	0	1	0
A0A0H3NDL4	A0A0H3NDL4	3	3	3	tr|A0A0H3NDL4|A0A0H3NDL4_SALTS Hypothetical helicase OS=Salmonella typhimurium (strain SL1344) OX=216597 GN=yejH PE=4 SV=1	1	3	3	3	0	1	1	1	1	0	0	0	0	0	0	0	0	0	0	0	0	0	0	0	0	0	0	0	1	0	0	0	0	0	0	0	0	0	0	0	0	0	0	0
A0A0H3NDL5	A0A0H3NDL5	8	8	8	tr|A0A0H3NDL5|A0A0H3NDL5_SALTS Geranyltranstransferase OS=Salmonella typhimurium (strain SL1344) OX=216597 GN=ispA PE=3 SV=1	1	8	8	8	7	6	6	3	4	1	1	1	1	1	1	0	0	0	0	0	0	0	0	0	2	0	0	0	1	0	0	0	0	0	0	0	0	0	0	0	0	0	0	0
A0A0H3NDL7	A0A0H3NDL7	14	14	14	tr|A0A0H3NDL7|A0A0H3NDL7_SALTS Peptidyl-tRNA hydrolase OS=Salmonella typhimurium (strain SL1344) OX=216597 GN=pth PE=3 SV=1	1	14	14	14	13	12	9	4	6	5	5	6	3	2	2	1	1	0	0	0	0	0	0	0	0	2	3	3	6	1	0	2	1	1	1	1	1	0	1	1	0	0	0	0
A0A0H3NDL9	A0A0H3NDL9	3	3	3	tr|A0A0H3NDL9|A0A0H3NDL9_SALTS Hypothetical sulphatase OS=Salmonella typhimurium (strain SL1344) OX=216597 GN=yejM PE=4 SV=1	1	3	3	3	0	1	1	1	1	1	1	0	0	0	0	0	0	0	0	0	0	0	0	0	2	0	0	0	1	0	0	0	0	0	0	0	0	0	0	0	0	0	0	0
A0A0H3NDM2	A0A0H3NDM2	6	6	6	tr|A0A0H3NDM2|A0A0H3NDM2_SALTS 4-methyl-5(B-hydroxyethyl)-thiazole monophosphate biosynthesis (ThiJ) protein OS=Salmonella typhimurium (strain SL1344) OX=216597 GN=thiJ PE=4 SV=1	1	6	6	6	6	5	5	3	1	1	1	0	0	0	0	0	0	0	0	0	0	0	0	0	0	1	3	1	4	2	1	1	0	0	0	0	0	0	0	0	0	0	0	0
A0A0H3NDM5	A0A0H3NDM5	15	15	15	tr|A0A0H3NDM5|A0A0H3NDM5_SALTS UDP-4-amino-4-deoxy-L-arabinose--oxoglutarate aminotransferase OS=Salmonella typhimurium (strain SL1344) OX=216597 GN=yfbE PE=3 SV=1	1	15	15	15	10	13	15	14	14	12	11	10	7	6	5	0	1	0	0	0	0	0	0	0	0	3	3	6	14	3	3	3	2	2	2	1	0	0	0	0	0	0	0	0
A0A0H3NDN0	A0A0H3NDN0	7	7	7	tr|A0A0H3NDN0|A0A0H3NDN0_SALTS Ubiquinol oxidase subunit 2 OS=Salmonella typhimurium (strain SL1344) OX=216597 GN=cyoA PE=3 SV=1	1	7	7	7	1	0	0	0	0	0	0	1	1	1	1	1	2	1	2	1	1	1	1	0	6	0	0	0	0	0	0	0	0	0	0	0	0	0	0	0	0	0	0	1
A0A0H3NDN2	A0A0H3NDN2	5	5	5	tr|A0A0H3NDN2|A0A0H3NDN2_SALTS Uncharacterized protein OS=Salmonella typhimurium (strain SL1344) OX=216597 GN=ycgB PE=4 SV=1	1	5	5	5	0	4	5	4	2	0	0	0	0	0	0	0	0	0	0	0	0	0	0	0	0	0	0	0	3	0	0	0	0	0	0	0	0	0	0	0	0	0	0	0
A0A0H3NDN3	A0A0H3NDN3	13	13	13	tr|A0A0H3NDN3|A0A0H3NDN3_SALTS ATP-dependent Clp protease proteolytic subunit OS=Salmonella typhimurium (strain SL1344) OX=216597 GN=clpP PE=3 SV=1	1	13	13	13	2	4	6	11	11	9	12	9	8	7	6	4	3	2	0	1	0	1	0	1	1	3	1	1	5	3	5	5	5	5	5	4	4	3	3	3	3	1	2	1
A0A0H3NDN5	A0A0H3NDN5	15	15	15	tr|A0A0H3NDN5|A0A0H3NDN5_SALTS 1,4-dihydroxy-2-naphthoyl-CoA synthase OS=Salmonella typhimurium (strain SL1344) OX=216597 GN=menB PE=3 SV=1	1	15	15	15	1	4	12	13	13	12	11	11	7	4	4	1	2	0	1	0	0	0	0	0	0	1	0	0	12	4	5	5	6	1	1	1	0	0	0	0	0	0	0	0
A0A0H3NDN6	A0A0H3NDN6	7	7	7	tr|A0A0H3NDN6|A0A0H3NDN6_SALTS Uncharacterized protein OS=Salmonella typhimurium (strain SL1344) OX=216597 GN=SL1344_1737 PE=4 SV=1	1	7	7	7	7	6	4	2	2	1	1	1	1	0	1	0	0	0	0	0	0	0	0	0	0	2	4	3	3	0	0	0	0	0	0	0	0	0	0	0	0	0	0	0
A0A0H3NDN7	A0A0H3NDN7	3	3	3	tr|A0A0H3NDN7|A0A0H3NDN7_SALTS Competence gene-DNA binding and transport OS=Salmonella typhimurium (strain SL1344) OX=216597 GN=comE1 PE=4 SV=1	1	3	3	3	2	1	0	0	0	0	0	0	0	0	0	0	0	0	0	0	0	0	0	0	0	1	2	2	0	0	0	0	0	0	0	0	0	0	0	0	0	0	0	0
A0A0H3NDN9	A0A0H3NDN9	14	14	14	tr|A0A0H3NDN9|A0A0H3NDN9_SALTS Probable septum site-determining protein MinC OS=Salmonella typhimurium (strain SL1344) OX=216597 GN=minC PE=3 SV=1	1	14	14	14	12	10	7	4	3	4	3	3	1	0	0	0	0	1	1	1	1	0	0	0	0	2	4	4	6	3	1	1	2	0	0	0	0	1	0	0	0	0	0	0
A0A0H3NDP0	A0A0H3NDP0	9	9	9	tr|A0A0H3NDP0|A0A0H3NDP0_SALTS Uncharacterized protein OS=Salmonella typhimurium (strain SL1344) OX=216597 GN=elaA PE=4 SV=1	1	9	9	9	7	6	5	2	2	1	1	0	0	0	0	0	0	0	0	0	0	0	0	0	0	1	5	3	4	1	1	1	1	0	0	0	0	0	0	0	0	0	0	0
A0A0H3NDP3	A0A0H3NDP3	5	5	5	tr|A0A0H3NDP3|A0A0H3NDP3_SALTS Ferredoxin-type protein NapG OS=Salmonella typhimurium (strain SL1344) OX=216597 GN=napG PE=4 SV=1	1	5	5	5	1	1	0	0	0	0	0	0	0	0	0	0	0	0	0	0	0	0	0	0	3	0	0	0	0	0	0	0	0	0	0	0	0	0	0	0	0	0	0	0
A0A0H3NDP6	A0A0H3NDP6	18	18	18	tr|A0A0H3NDP6|A0A0H3NDP6_SALTS Para-aminobenzoate synthase component I OS=Salmonella typhimurium (strain SL1344) OX=216597 GN=pabB PE=4 SV=1	1	18	18	18	12	13	11	4	2	0	0	0	0	0	0	0	0	0	0	0	0	0	0	0	0	1	3	3	9	0	0	0	0	0	0	0	0	0	0	0	0	0	0	0
A0A0H3NDP7	A0A0H3NDP7	2	2	2	tr|A0A0H3NDP7|A0A0H3NDP7_SALTS 50S ribosomal protein L31 type B OS=Salmonella typhimurium (strain SL1344) OX=216597 GN=rpmE2 PE=3 SV=1	1	2	2	2	0	0	0	0	0	0	0	0	0	0	0	0	0	0	0	0	1	1	1	0	1	0	0	0	0	0	0	0	0	0	0	0	0	0	0	0	1	0	0	1
A0A0H3NDQ0	A0A0H3NDQ0	5	5	5	tr|A0A0H3NDQ0|A0A0H3NDQ0_SALTS Phosphotransferase RcsD OS=Salmonella typhimurium (strain SL1344) OX=216597 GN=yojN PE=3 SV=1	1	5	5	5	0	0	0	0	0	0	0	0	0	0	0	0	0	0	0	0	0	0	0	0	4	0	0	0	0	0	0	0	0	0	0	0	0	0	0	0	0	0	0	0
A0A0H3NDQ1	A0A0H3NDQ1	2	2	2	tr|A0A0H3NDQ1|A0A0H3NDQ1_SALTS NADH-quinone oxidoreductase subunit H OS=Salmonella typhimurium (strain SL1344) OX=216597 GN=nuoH PE=3 SV=1	1	2	2	2	0	0	0	0	0	0	0	0	0	0	0	0	0	0	0	0	0	0	0	0	2	0	0	0	0	0	0	0	0	0	0	0	0	0	0	0	0	0	0	0
A0A0H3NDQ2	A0A0H3NDQ2	21	21	21	tr|A0A0H3NDQ2|A0A0H3NDQ2_SALTS PTS system, mannose-specific IIAB component OS=Salmonella typhimurium (strain SL1344) OX=216597 GN=SL1344_1759 PE=4 SV=1	1	21	21	21	14	15	14	14	14	15	14	13	13	11	8	3	10	3	4	5	6	8	4	4	16	10	12	12	18	10	9	7	6	6	5	4	4	3	4	4	3	2	3	5
A0A0H3NDQ5	A0A0H3NDQ5	12	12	12	tr|A0A0H3NDQ5|A0A0H3NDQ5_SALTS NADH-quinone oxidoreductase subunit B OS=Salmonella typhimurium (strain SL1344) OX=216597 GN=nuoB PE=3 SV=1	1	12	12	12	7	5	5	3	4	3	6	8	7	4	2	0	3	1	3	2	3	4	2	0	5	0	0	0	5	0	0	0	0	1	1	1	0	1	0	1	0	0	0	3
A0A0H3NDQ7	A0A0H3NDQ7	4	4	4	tr|A0A0H3NDQ7|A0A0H3NDQ7_SALTS rRNA guanine-N1-methyltransferase OS=Salmonella typhimurium (strain SL1344) OX=216597 GN=rrmA PE=4 SV=1	1	4	4	4	4	1	2	0	1	0	0	0	0	0	0	0	0	0	0	0	0	0	0	0	0	0	1	1	1	0	0	0	0	0	0	0	0	0	0	0	0	0	0	0
A0A0H3NDQ8	A0A0H3NDQ8	1	1	1	tr|A0A0H3NDQ8|A0A0H3NDQ8_SALTS Uncharacterized protein OS=Salmonella typhimurium (strain SL1344) OX=216597 GN=SL1344_0472 PE=4 SV=1	1	1	1	1	0	0	0	0	0	0	0	1	0	0	0	0	0	0	0	0	0	0	0	0	0	0	0	0	0	0	0	0	0	0	0	0	0	0	0	0	0	0	0	0
A0A0H3NDR1	A0A0H3NDR1	6	6	6	tr|A0A0H3NDR1|A0A0H3NDR1_SALTS 5-deoxynucleotidase YfbR OS=Salmonella typhimurium (strain SL1344) OX=216597 GN=yfbR PE=3 SV=1	1	6	6	6	5	6	5	2	2	1	1	0	0	0	0	0	0	0	0	0	0	0	0	0	0	0	0	0	2	0	0	0	0	0	0	0	0	0	0	0	0	0	0	0
A0A0H3NDR2	A0A0H3NDR2	9	9	9	tr|A0A0H3NDR2|A0A0H3NDR2_SALTS Nucleoid-associated protein YbaB OS=Salmonella typhimurium (strain SL1344) OX=216597 GN=ybaB PE=3 SV=1	1	9	9	9	8	7	6	5	4	1	2	0	0	0	0	0	0	0	0	0	0	0	0	0	0	1	2	1	4	0	0	0	2	1	2	1	1	1	1	1	1	0	0	0
A0A0H3NDR3	A0A0H3NDR3	56	56	56	tr|A0A0H3NDR3|A0A0H3NDR3_SALTS Glycerol-3-phosphate dehydrogenase OS=Salmonella typhimurium (strain SL1344) OX=216597 GN=glpA PE=3 SV=1	1	56	56	56	37	42	42	43	41	42	42	46	48	46	42	23	31	14	15	13	10	11	7	4	23	15	12	18	39	15	12	15	28	32	28	25	25	18	15	10	8	6	6	10
A0A0H3NDR5	A0A0H3NDR5	24	24	24	tr|A0A0H3NDR5|A0A0H3NDR5_SALTS Acetate kinase OS=Salmonella typhimurium (strain SL1344) OX=216597 GN=ackA PE=3 SV=1	1	24	24	24	18	21	20	19	20	17	14	14	11	13	12	7	8	4	4	3	1	2	0	0	2	9	13	14	18	13	12	13	12	10	8	8	9	7	4	3	3	2	2	2
A0A0H3NDR7	A0A0H3NDR7	2	2	2	tr|A0A0H3NDR7|A0A0H3NDR7_SALTS 2-keto-3-deoxy-L-rhamnonate aldolase OS=Salmonella typhimurium (strain SL1344) OX=216597 GN=rhmA PE=3 SV=1	1	2	2	2	0	0	0	2	2	2	1	0	0	0	0	0	0	0	0	0	0	0	0	0	0	0	0	0	2	0	0	0	0	0	0	0	0	0	0	0	0	0	0	0
A0A0H3NDR8	A0A0H3NDR8	1	1	1	tr|A0A0H3NDR8|A0A0H3NDR8_SALTS Acetyl esterase OS=Salmonella typhimurium (strain SL1344) OX=216597 GN=aes PE=3 SV=1	1	1	1	1	0	1	0	0	0	0	0	0	0	0	0	0	0	0	0	0	0	0	0	0	0	0	0	0	0	0	0	0	0	0	0	0	0	0	0	0	0	0	0	0
A0A0H3NDR9	A0A0H3NDR9	32	32	32	tr|A0A0H3NDR9|A0A0H3NDR9_SALTS Tail-specific protease OS=Salmonella typhimurium (strain SL1344) OX=216597 GN=prc PE=3 SV=1	1	32	32	32	9	27	28	24	23	14	12	5	4	2	1	0	0	0	2	1	0	0	0	0	0	5	2	6	21	7	5	3	2	1	1	1	1	0	0	0	0	0	0	0
A0A0H3NDS2	A0A0H3NDS2	16	16	16	tr|A0A0H3NDS2|A0A0H3NDS2_SALTS Cys-tRNA(Pro)/Cys-tRNA(Cys) deacylase OS=Salmonella typhimurium (strain SL1344) OX=216597 GN=ybaK PE=3 SV=1	1	16	16	16	15	11	9	3	4	3	2	1	0	0	0	0	0	0	0	0	0	0	0	0	0	6	9	8	9	3	2	1	1	1	1	0	0	0	0	0	0	0	0	0
A0A0H3NDS5	A0A0H3NDS5	4	4	4	tr|A0A0H3NDS5|A0A0H3NDS5_SALTS Phosphoesterase OS=Salmonella typhimurium (strain SL1344) OX=216597 GN=yfcE PE=3 SV=1	1	4	4	4	4	4	3	3	3	2	0	0	0	0	0	0	0	0	0	0	0	0	0	0	0	1	3	3	3	2	2	2	1	1	2	0	0	0	0	0	0	0	0	0
A0A0H3NDS7	A0A0H3NDS7	4	4	4	tr|A0A0H3NDS7|A0A0H3NDS7_SALTS Ribosomal RNA small subunit methyltransferase F OS=Salmonella typhimurium (strain SL1344) OX=216597 GN=yebU PE=3 SV=1	1	4	4	4	4	3	2	0	0	0	0	0	0	0	0	0	0	0	0	0	0	0	0	0	0	0	1	1	2	1	0	0	0	0	0	0	0	0	0	0	0	0	0	0
A0A0H3NDS8	A0A0H3NDS8	54	54	54	tr|A0A0H3NDS8|A0A0H3NDS8_SALTS Bifunctional polymyxin resistance protein ArnA OS=Salmonella typhimurium (strain SL1344) OX=216597 GN=yfbG PE=3 SV=1	1	54	54	54	0	8	21	40	45	43	35	30	17	13	10	1	4	0	0	0	0	0	1	2	2	9	0	3	17	15	20	19	15	10	7	5	4	2	0	0	0	0	0	0
A0A0H3NDT1	A0A0H3NDT1	3	3	3	tr|A0A0H3NDT1|A0A0H3NDT1_SALTS Polymyxin B resistance protein OS=Salmonella typhimurium (strain SL1344) OX=216597 GN=pmrD PE=4 SV=1	1	3	3	3	2	2	1	0	0	0	2	1	2	0	0	0	0	0	0	0	0	0	0	0	0	0	1	1	1	0	0	0	0	0	0	0	0	0	0	0	0	0	0	0
A0A0H3NDT2	A0A0H3NDT2	7	7	7	tr|A0A0H3NDT2|A0A0H3NDT2_SALTS Guanine nucleotide exchange factor OS=Salmonella typhimurium (strain SL1344) OX=216597 GN=sopE2 PE=3 SV=1	1	7	7	7	5	4	4	4	3	2	1	1	1	0	0	0	0	0	0	0	0	0	0	1	2	1	1	1	4	1	0	0	0	0	0	0	0	0	0	0	0	0	0	0
A0A0H3NDT3	A0A0H3NDT3	10	10	10	tr|A0A0H3NDT3|A0A0H3NDT3_SALTS Hypothetical oxidoreductase OS=Salmonella typhimurium (strain SL1344) OX=216597 GN=ybbO PE=4 SV=1	1	10	10	10	0	0	1	2	3	3	5	2	5	5	5	1	3	1	1	1	0	1	0	0	4	0	0	0	0	0	0	0	0	0	1	1	0	0	0	0	0	0	0	1
A0A0H3NDT6	A0A0H3NDT6	6	6	6	tr|A0A0H3NDT6|A0A0H3NDT6_SALTS Lipoprotein OS=Salmonella typhimurium (strain SL1344) OX=216597 GN=sfbA PE=4 SV=1	1	6	6	6	4	3	1	1	1	1	0	0	0	0	0	0	0	0	0	0	0	0	0	0	0	1	3	1	3	1	0	0	0	0	0	0	0	0	0	0	0	0	0	0
A0A0H3NDT8	A0A0H3NDT8	17	17	17	tr|A0A0H3NDT8|A0A0H3NDT8_SALTS 2-succinyl-5-enolpyruvyl-6-hydroxy-3-cyclohexene-1-carboxylate synthase OS=Salmonella typhimurium (strain SL1344) OX=216597 GN=menD PE=3 SV=1	1	17	17	17	0	0	3	11	12	4	3	1	1	1	0	0	0	0	0	0	0	0	0	0	0	1	0	0	2	3	2	2	2	1	1	0	0	0	0	0	0	0	0	0
A0A0H3NDU2	A0A0H3NDU2	20	20	20	tr|A0A0H3NDU2|A0A0H3NDU2_SALTS Amidophosphoribosyltransferase OS=Salmonella typhimurium (strain SL1344) OX=216597 GN=purF PE=3 SV=1	1	20	20	20	0	0	8	15	12	13	7	6	4	4	1	0	0	0	0	0	0	0	0	0	0	2	0	1	6	5	4	4	4	2	0	1	0	0	0	0	0	0	0	0
A0A0H3NDU3	A0A0H3NDU3	23	23	23	tr|A0A0H3NDU3|A0A0H3NDU3_SALTS Hypothetical receptor/regulator protein OS=Salmonella typhimurium (strain SL1344) OX=216597 GN=SL1344_2283 PE=4 SV=1	1	23	23	23	15	15	8	8	10	9	9	9	8	10	10	8	7	7	7	5	5	5	5	3	13	9	7	7	8	6	5	5	5	4	6	6	9	8	7	9	9	7	5	6
A0A0H3NDV0	A0A0H3NDV0	6	6	6	tr|A0A0H3NDV0|A0A0H3NDV0_SALTS Uncharacterized protein OS=Salmonella typhimurium (strain SL1344) OX=216597 GN=ylbA PE=4 SV=1	1	6	6	6	0	0	2	6	6	6	4	3	3	2	2	0	0	0	0	0	0	0	0	0	0	1	0	0	3	1	3	3	2	3	2	0	0	0	0	0	0	0	0	0
A0A0H3NDV2	A0A0H3NDV2	32	32	32	tr|A0A0H3NDV2|A0A0H3NDV2_SALTS NADH-quinone oxidoreductase subunit F OS=Salmonella typhimurium (strain SL1344) OX=216597 GN=nuoF PE=3 SV=1	1	32	32	32	13	18	17	16	19	15	16	18	16	11	7	5	5	4	5	5	6	6	1	1	16	3	1	3	18	3	6	5	5	4	3	2	1	1	2	1	0	1	1	5
A0A0H3NDV3	A0A0H3NDV3	5	5	5	tr|A0A0H3NDV3|A0A0H3NDV3_SALTS Hypothetical exported protein OS=Salmonella typhimurium (strain SL1344) OX=216597 GN=SL1344_1807 PE=4 SV=1	1	5	5	5	5	3	2	1	1	1	0	0	0	0	0	0	0	0	0	0	0	0	0	0	0	2	2	2	2	1	1	1	1	0	0	0	0	0	0	0	0	0	0	0
A0A0H3NDV8	A0A0H3NDV8	12	12	12	tr|A0A0H3NDV8|A0A0H3NDV8_SALTS Peptidyl-prolyl cis-trans isomerase OS=Salmonella typhimurium (strain SL1344) OX=216597 GN=ppiB PE=3 SV=1	1	12	12	12	12	11	9	10	10	6	9	4	5	5	4	1	1	1	0	0	0	0	0	0	0	2	5	6	6	4	4	3	3	2	2	2	2	1	1	0	1	0	0	0
A0A0H3NDV9	A0A0H3NDV9	4	4	4	tr|A0A0H3NDV9|A0A0H3NDV9_SALTS Formate-dependent phosphoribosylglycinamide formyltransferase OS=Salmonella typhimurium (strain SL1344) OX=216597 GN=purT PE=3 SV=1	1	4	4	4	0	2	2	2	0	0	0	0	0	0	0	0	0	0	0	0	0	0	0	0	0	0	0	0	1	0	0	0	0	0	0	0	0	0	0	0	0	0	0	0
A0A0H3NDW0	A0A0H3NDW0	11	11	11	tr|A0A0H3NDW0|A0A0H3NDW0_SALTS Hypothetical phosphatase OS=Salmonella typhimurium (strain SL1344) OX=216597 GN=yfbT PE=4 SV=1	1	11	11	11	9	7	5	1	1	0	0	0	0	0	0	0	0	0	0	0	0	0	0	0	0	2	8	8	8	3	3	2	2	0	0	0	0	0	0	0	0	0	0	0
A0A0H3NDW2	A0A0H3NDW2	4	4	4	tr|A0A0H3NDW2|A0A0H3NDW2_SALTS Uncharacterized protein OS=Salmonella typhimurium (strain SL1344) OX=216597 GN=ybcJ PE=4 SV=1	1	4	4	4	4	3	1	2	2	1	2	1	1	0	0	0	0	0	0	0	0	0	0	0	0	0	1	1	3	0	0	0	0	0	0	0	0	0	0	0	0	0	0	0
A0A0H3NDW4	A0A0H3NDW4	29	29	29	tr|A0A0H3NDW4|A0A0H3NDW4_SALTS Pyruvate kinase OS=Salmonella typhimurium (strain SL1344) OX=216597 GN=pykA PE=3 SV=1	1	29	29	29	12	22	25	27	23	24	21	20	18	17	13	3	9	1	2	1	1	1	0	0	1	9	7	15	25	16	14	14	11	7	5	6	5	4	4	2	4	0	0	0
A0A0H3NDW5	A0A0H3NDW5	5	5	5	tr|A0A0H3NDW5|A0A0H3NDW5_SALTS Phosphohistidine phosphatase OS=Salmonella typhimurium (strain SL1344) OX=216597 GN=sixA PE=4 SV=1	1	5	5	5	5	5	5	2	1	0	1	0	0	0	0	0	0	0	0	0	0	0	0	0	0	0	0	0	4	0	0	0	0	0	0	0	0	0	0	0	0	0	0	0
A0A0H3NDW7	A0A0H3NDW7	5	5	5	tr|A0A0H3NDW7|A0A0H3NDW7_SALTS Hypothetical sugar phosphotransferase component II A OS=Salmonella typhimurium (strain SL1344) OX=216597 GN=SL1344_2313 PE=4 SV=1	1	5	5	5	5	4	1	1	0	0	0	0	0	0	0	0	0	0	0	0	0	0	0	0	0	1	2	2	3	0	1	1	1	0	0	0	0	0	0	0	0	0	0	0
A0A0H3NDX2	A0A0H3NDX2	10	10	10	tr|A0A0H3NDX2|A0A0H3NDX2_SALTS Probable transcriptional regulatory protein YebC OS=Salmonella typhimurium (strain SL1344) OX=216597 GN=yebC PE=3 SV=1	1	10	10	10	10	10	9	8	8	5	6	3	4	2	1	0	0	0	0	0	0	0	0	0	0	2	2	3	7	1	1	1	1	1	1	0	0	0	0	0	0	0	0	0
A0A0H3NDX3	A0A0H3NDX3	2	2	2	tr|A0A0H3NDX3|A0A0H3NDX3_SALTS Hypothetical glutathione-S transferase OS=Salmonella typhimurium (strain SL1344) OX=216597 GN=yfcG PE=4 SV=1	1	2	2	2	0	1	0	0	0	0	0	0	0	0	0	0	0	0	0	0	0	0	0	0	0	0	1	0	0	0	0	0	0	0	0	0	0	0	0	0	0	0	0	0
A0A0H3NDX4	A0A0H3NDX4	1	1	1	tr|A0A0H3NDX4|A0A0H3NDX4_SALTS Phosphoglycerate transport regulatory protein PgtC OS=Salmonella typhimurium (strain SL1344) OX=216597 GN=pgtC PE=4 SV=1	1	1	1	1	0	1	0	0	0	0	0	0	0	0	0	0	0	0	0	0	0	0	0	0	0	0	0	0	0	0	0	0	0	0	0	0	0	0	0	0	0	0	0	0
A0A0H3NDX8	A0A0H3NDX8	20	20	19	tr|A0A0H3NDX8|A0A0H3NDX8_SALTS Histidine-binding periplasmic protein OS=Salmonella typhimurium (strain SL1344) OX=216597 GN=hisJ PE=3 SV=1	1	20	20	19	19	19	15	13	14	10	9	7	6	3	5	2	4	1	1	1	0	0	0	0	0	6	11	11	14	8	5	5	4	3	4	3	3	2	2	1	1	0	0	0
A0A0H3NDY0	A0A0H3NDY0	13	13	13	tr|A0A0H3NDY0|A0A0H3NDY0_SALTS Glucokinase OS=Salmonella typhimurium (strain SL1344) OX=216597 GN=glk PE=3 SV=1	1	13	13	13	9	10	10	9	8	7	6	5	3	3	3	1	1	0	0	1	0	0	0	0	0	2	6	6	10	5	3	3	1	1	1	0	0	0	0	0	0	0	0	0
A0A0H3NDY7	A0A0H3NDY7	20	20	20	tr|A0A0H3NDY7|A0A0H3NDY7_SALTS Oxygen-insensitive NAD(P)H nitroreductase OS=Salmonella typhimurium (strain SL1344) OX=216597 GN=nfnB PE=4 SV=1	1	20	20	20	18	18	17	16	15	10	9	7	6	4	5	2	0	2	0	0	0	0	0	0	0	4	5	6	17	7	5	2	1	0	0	1	0	2	2	2	1	0	0	0
A0A0H3NDY8	A0A0H3NDY8	12	12	12	tr|A0A0H3NDY8|A0A0H3NDY8_SALTS Chemotaxis protein CheY OS=Salmonella typhimurium (strain SL1344) OX=216597 GN=cheY PE=4 SV=1	1	12	12	12	11	9	8	6	5	4	4	4	4	3	3	2	1	1	0	0	0	2	2	2	3	7	11	9	8	6	6	4	4	3	3	1	1	1	1	1	1	1	0	1
A0A0H3NDZ0	A0A0H3NDZ0	4	4	4	tr|A0A0H3NDZ0|A0A0H3NDZ0_SALTS Cell division protein DedD OS=Salmonella typhimurium (strain SL1344) OX=216597 GN=dedD PE=3 SV=1	1	4	4	4	2	2	1	1	0	0	0	0	0	0	0	0	0	0	0	0	0	0	0	0	4	0	0	0	1	0	0	0	0	0	0	0	0	0	0	0	0	0	0	0
A0A0H3NDZ2	A0A0H3NDZ2	36	36	36	tr|A0A0H3NDZ2|A0A0H3NDZ2_SALTS Glutamate--tRNA ligase OS=Salmonella typhimurium (strain SL1344) OX=216597 GN=gltX PE=3 SV=1	1	36	36	36	32	31	29	26	25	20	18	13	9	7	3	0	2	0	0	0	0	0	0	0	0	6	15	17	28	11	12	11	9	5	5	1	1	0	0	0	0	0	0	0
A0A0H3NDZ4	A0A0H3NDZ4	9	9	9	tr|A0A0H3NDZ4|A0A0H3NDZ4_SALTS Hypothetical semialdehyde dehydrogenase OS=Salmonella typhimurium (strain SL1344) OX=216597 GN=usg PE=3 SV=1	1	9	9	9	3	6	6	8	6	4	4	3	3	4	4	2	2	0	0	0	0	1	1	1	5	0	2	4	6	3	3	2	3	1	0	0	0	0	1	1	0	1	2	1
A0A0H3NDZ5	A0A0H3NDZ5	30	30	30	tr|A0A0H3NDZ5|A0A0H3NDZ5_SALTS Chemotaxis protein CheA OS=Salmonella typhimurium (strain SL1344) OX=216597 GN=cheA PE=4 SV=1	1	30	30	30	12	16	12	14	13	8	14	7	9	5	6	3	5	3	3	3	2	4	5	3	20	7	1	2	8	4	6	5	9	5	5	4	6	6	4	2	2	2	3	4
A0A0H3NDZ7	A0A0H3NDZ7	9	9	9	tr|A0A0H3NDZ7|A0A0H3NDZ7_SALTS Enterobactin synthetase component F OS=Salmonella typhimurium (strain SL1344) OX=216597 GN=entF PE=4 SV=1	1	9	9	9	0	0	5	2	3	2	1	1	1	1	1	1	1	0	0	0	0	0	0	0	0	0	0	0	2	1	1	1	0	0	0	0	0	0	0	0	0	0	0	0
A0A0H3NE00	A0A0H3NE00	5	5	5	tr|A0A0H3NE00|A0A0H3NE00_SALTS Universal stress protein OS=Salmonella typhimurium (strain SL1344) OX=216597 GN=yecG PE=3 SV=1	1	5	5	5	3	2	0	0	0	0	0	0	0	0	0	0	0	0	0	0	0	0	0	0	0	0	2	1	0	0	0	0	0	0	0	0	0	0	0	0	0	0	0	0
A0A0H3NE03	A0A0H3NE03	6	6	6	tr|A0A0H3NE03|A0A0H3NE03_SALTS Cell division protein ZipA OS=Salmonella typhimurium (strain SL1344) OX=216597 GN=zipA PE=3 SV=1	1	6	6	6	1	1	1	1	1	1	1	1	1	1	1	0	2	0	1	0	0	0	0	0	3	0	0	0	0	0	0	0	0	0	0	0	0	0	0	0	0	0	0	0
A0A0H3NE04	A0A0H3NE04	12	12	12	tr|A0A0H3NE04|A0A0H3NE04_SALTS Ferritin OS=Salmonella typhimurium (strain SL1344) OX=216597 GN=ftn PE=3 SV=1	1	12	12	12	4	4	2	0	2	1	5	8	9	9	10	7	8	5	4	4	4	4	3	1	2	2	0	0	1	0	0	1	2	3	5	5	5	3	3	2	2	1	1	5
A0A0H3NE05	A0A0H3NE05	9	9	9	tr|A0A0H3NE05|A0A0H3NE05_SALTS tRNA 5-methylaminomethyl-2-thiouridine biosynthesis bifunctional protein MnmC OS=Salmonella typhimurium (strain SL1344) OX=216597 GN=mnmC PE=3 SV=1	1	9	9	9	0	7	6	2	2	0	0	0	0	0	0	0	0	0	0	0	0	0	0	0	0	1	0	3	2	1	0	0	0	0	0	0	0	0	0	0	0	0	0	0
A0A0H3NE07	A0A0H3NE07	5	5	5	tr|A0A0H3NE07|A0A0H3NE07_SALTS 2,3-dihydro-2,3-dihydroxybenzoate dehydrogenase OS=Salmonella typhimurium (strain SL1344) OX=216597 GN=entA PE=4 SV=1	1	5	5	5	0	3	3	2	2	1	0	0	0	0	0	0	0	0	0	0	0	0	0	0	0	0	0	0	1	1	1	0	0	0	0	0	0	0	0	0	0	0	0	0
A0A0H3NE09	A0A0H3NE09	14	14	14	tr|A0A0H3NE09|A0A0H3NE09_SALTS Pts system, glucose-specific IIA component OS=Salmonella typhimurium (strain SL1344) OX=216597 GN=crr PE=4 SV=1	1	14	14	14	12	12	11	9	7	7	7	7	7	6	6	5	6	5	5	5	4	2	2	3	1	4	9	10	11	10	6	5	4	3	3	3	2	2	2	2	2	2	2	1
A0A0H3NE10	A0A0H3NE10	14	14	14	tr|A0A0H3NE10|A0A0H3NE10_SALTS Chorismate synthase OS=Salmonella typhimurium (strain SL1344) OX=216597 GN=aroC PE=3 SV=1	1	14	14	14	1	4	6	10	8	7	4	2	3	2	0	0	0	0	0	0	0	0	0	0	0	1	1	1	7	4	3	3	2	2	0	0	0	0	0	0	0	0	0	0
A0A0H3NE12	A0A0H3NE12	7	7	7	tr|A0A0H3NE12|A0A0H3NE12_SALTS 3-ketoacyl-CoA thiolase OS=Salmonella typhimurium (strain SL1344) OX=216597 GN=fadI PE=3 SV=1	1	7	7	7	0	0	0	1	3	4	4	4	4	4	4	2	0	1	1	0	0	0	0	0	0	0	0	0	0	0	0	0	0	0	0	0	0	1	1	1	1	0	1	0
A0A0H3NE13	A0A0H3NE13	9	9	9	tr|A0A0H3NE13|A0A0H3NE13_SALTS Hypothetical aminotransferase OS=Salmonella typhimurium (strain SL1344) OX=216597 GN=ybdL PE=4 SV=1	1	9	9	9	2	7	3	0	0	0	0	0	0	0	0	0	0	0	0	0	0	0	0	0	0	0	1	1	3	0	0	0	0	0	0	0	0	0	0	0	0	0	0	0
A0A0H3NE14	A0A0H3NE14	3	3	3	tr|A0A0H3NE14|A0A0H3NE14_SALTS Uncharacterized protein OS=Salmonella typhimurium (strain SL1344) OX=216597 GN=yecF PE=4 SV=1	1	3	3	3	2	2	2	2	2	2	2	1	1	1	0	0	0	0	0	0	0	0	0	0	0	0	3	2	2	0	0	0	0	0	0	0	0	0	0	0	0	0	0	0
A0A0H3NE15	A0A0H3NE15	1	1	1	tr|A0A0H3NE15|A0A0H3NE15_SALTS Uncharacterized protein OS=Salmonella typhimurium (strain SL1344) OX=216597 GN=yfeK PE=4 SV=1	1	1	1	1	1	1	0	0	0	0	0	0	0	0	0	0	0	0	0	0	0	0	0	0	0	0	0	0	0	0	0	0	0	0	0	0	0	0	0	0	0	0	0	0
A0A0H3NE21	A0A0H3NE21	13	13	13	tr|A0A0H3NE21|A0A0H3NE21_SALTS Alkyl hydroperoxide reductase c22 protein OS=Salmonella typhimurium (strain SL1344) OX=216597 GN=ahpC PE=4 SV=1	1	13	13	13	12	13	12	12	11	11	10	8	8	6	4	2	4	2	1	1	1	0	0	0	1	6	8	10	13	9	7	4	4	4	4	2	1	1	0	0	0	0	0	0
A0A0H3NE22	A0A0H3NE22	30	30	30	tr|A0A0H3NE22|A0A0H3NE22_SALTS Cystine-binding periplasmic protein (FliY) OS=Salmonella typhimurium (strain SL1344) OX=216597 GN=fliY PE=3 SV=1	1	30	30	30	27	23	21	17	14	10	8	8	6	4	4	2	0	0	0	0	0	0	0	0	0	11	14	13	22	8	6	5	6	3	4	3	2	1	1	1	0	0	0	0
A0A0H3NE23	A0A0H3NE23	9	9	9	tr|A0A0H3NE23|A0A0H3NE23_SALTS Hypothetical decarboxylase OS=Salmonella typhimurium (strain SL1344) OX=216597 GN=SL1344_2373 PE=3 SV=1	1	9	9	9	0	5	2	0	0	0	0	0	0	0	0	0	0	0	0	0	0	0	0	0	0	1	0	1	2	0	0	0	0	0	0	0	0	0	0	0	0	0	0	0
A0A0H3NE27	A0A0H3NE27	27	27	27	tr|A0A0H3NE27|A0A0H3NE27_SALTS Flagellar hook-associated protein 2 OS=Salmonella typhimurium (strain SL1344) OX=216597 GN=fliD PE=3 SV=1	1	27	27	27	18	20	15	12	9	6	8	1	4	0	2	2	3	3	5	4	4	11	7	5	22	1	3	3	9	0	1	1	1	0	0	0	0	1	1	1	1	1	2	10
A0A0H3NE29	A0A0H3NE29	1	1	1	tr|A0A0H3NE29|A0A0H3NE29_SALTS Hypothetical membrane protein OS=Salmonella typhimurium (strain SL1344) OX=216597 GN=yfeA PE=4 SV=1	1	1	1	1	0	0	0	0	0	0	0	0	0	0	0	0	0	0	0	0	0	0	0	0	1	0	0	0	0	0	0	0	0	0	0	0	0	0	0	0	0	0	0	0
A0A0H3NE30	A0A0H3NE30	15	15	15	tr|A0A0H3NE30|A0A0H3NE30_SALTS Ethanolamine ammonia-lyase heavy chain OS=Salmonella typhimurium (strain SL1344) OX=216597 GN=eutB PE=4 SV=1	1	15	15	15	0	0	0	4	7	12	9	7	4	1	1	0	1	0	0	0	0	0	0	0	1	0	0	0	0	0	1	2	1	1	1	1	1	0	0	0	0	0	0	0
A0A0H3NE38	A0A0H3NE38	14	14	14	tr|A0A0H3NE38|A0A0H3NE38_SALTS Flagellar motor switch protein FliG OS=Salmonella typhimurium (strain SL1344) OX=216597 GN=fliG PE=3 SV=1	1	14	14	14	10	9	3	0	0	0	0	0	0	0	0	0	0	0	0	0	0	1	0	0	8	1	2	2	2	0	0	0	0	0	0	0	0	0	0	0	0	0	1	1
A0A0H3NE42	A0A0H3NE42	8	8	8	tr|A0A0H3NE42|A0A0H3NE42_SALTS Flagellar protein FliL OS=Salmonella typhimurium (strain SL1344) OX=216597 GN=fliL PE=3 SV=1	1	8	8	8	0	0	0	0	0	0	0	0	0	0	0	0	0	0	0	0	0	0	0	0	6	0	0	0	0	0	0	0	0	0	0	0	0	0	0	0	0	0	0	0
A0A0H3NE44	A0A0H3NE44	23	23	23	tr|A0A0H3NE44|A0A0H3NE44_SALTS Cysteine synthase OS=Salmonella typhimurium (strain SL1344) OX=216597 GN=cysK PE=3 SV=1	1	23	23	23	20	21	22	19	19	19	19	16	14	15	16	7	12	4	2	2	0	1	1	0	2	15	17	20	20	18	18	18	17	12	9	9	8	7	5	6	4	1	1	2
A0A0H3NE47	A0A0H3NE47	25	25	25	tr|A0A0H3NE47|A0A0H3NE47_SALTS Transketolase OS=Salmonella typhimurium (strain SL1344) OX=216597 GN=tktB PE=3 SV=1	1	25	25	25	1	7	17	18	18	15	13	6	2	3	4	1	2	0	0	0	0	0	0	0	0	3	0	2	18	5	6	6	6	3	3	3	0	0	0	0	1	0	0	0
A0A0H3NE48	A0A0H3NE48	2	2	2	tr|A0A0H3NE48|A0A0H3NE48_SALTS Pyridoxine/pyridoxal/pyridoxamine kinase OS=Salmonella typhimurium (strain SL1344) OX=216597 GN=pdxK PE=3 SV=1	1	2	2	2	0	1	0	0	0	0	1	0	0	0	0	0	0	0	0	0	0	0	0	0	0	0	0	0	1	0	0	0	0	0	0	0	0	0	0	0	0	0	0	0
A0A0H3NE49	A0A0H3NE49	21	21	21	tr|A0A0H3NE49|A0A0H3NE49_SALTS Lipoyl synthase OS=Salmonella typhimurium (strain SL1344) OX=216597 GN=lipA PE=3 SV=1	1	21	21	21	19	18	18	14	16	12	15	12	13	16	16	8	18	10	7	1	0	1	0	0	2	4	6	4	17	4	3	3	4	2	3	2	4	3	7	7	5	3	2	1
A0A0H3NE51	A0A0H3NE51	11	11	11	tr|A0A0H3NE51|A0A0H3NE51_SALTS Cysteine synthase OS=Salmonella typhimurium (strain SL1344) OX=216597 GN=cysM PE=3 SV=1	1	11	11	11	3	6	4	5	1	1	0	0	0	0	0	0	0	0	0	0	0	0	0	0	0	1	2	3	6	3	3	1	1	0	0	0	0	0	0	0	0	0	0	0
A0A0H3NE52	A0A0H3NE52	3	3	3	tr|A0A0H3NE52|A0A0H3NE52_SALTS Mannosyl-3-phosphoglycerate phosphatase OS=Salmonella typhimurium (strain SL1344) OX=216597 GN=mngB PE=3 SV=1	1	3	3	3	1	2	0	0	0	0	0	0	0	0	0	0	0	0	0	0	0	0	0	0	0	0	1	1	0	0	0	0	0	0	0	0	0	0	0	0	0	0	0	0
A0A0H3NE53	A0A0H3NE53	3	3	3	tr|A0A0H3NE53|A0A0H3NE53_SALTS Endolytic peptidoglycan transglycosylase RlpA OS=Salmonella typhimurium (strain SL1344) OX=216597 GN=rlpA PE=3 SV=1	1	3	3	3	0	0	0	0	0	0	0	0	0	0	0	0	1	0	0	0	0	0	0	0	2	1	0	0	0	0	0	0	0	0	0	0	0	0	0	0	0	0	0	0
A0A0H3NE54	A0A0H3NE54	3	3	3	tr|A0A0H3NE54|A0A0H3NE54_SALTS Hypothetical oxidoreductase OS=Salmonella typhimurium (strain SL1344) OX=216597 GN=aegA PE=4 SV=1	1	3	3	3	1	1	1	1	1	0	1	0	0	0	0	0	0	0	0	0	0	0	0	0	0	0	0	0	2	0	0	1	0	0	0	0	0	0	0	0	0	0	0	0
A0A0H3NE56	A0A0H3NE56	4	4	4	tr|A0A0H3NE56|A0A0H3NE56_SALTS Very short patch repair endonuclease OS=Salmonella typhimurium (strain SL1344) OX=216597 GN=vsr PE=3 SV=1	1	4	4	4	2	1	0	0	0	0	0	0	0	0	0	0	0	0	0	0	0	0	0	0	0	0	1	0	1	0	0	0	0	0	0	0	0	0	0	0	0	0	0	0
A0A0H3NE57	A0A0H3NE57	19	19	19	tr|A0A0H3NE57|A0A0H3NE57_SALTS Hypothetical oxidoreductase OS=Salmonella typhimurium (strain SL1344) OX=216597 GN=ucpA PE=4 SV=1	1	19	19	19	11	16	16	13	15	13	11	9	9	6	2	0	0	0	0	0	0	0	0	0	0	7	6	8	18	10	8	8	8	6	4	4	2	1	1	0	0	0	0	0
A0A0H3NE62	A0A0H3NE62	2	2	2	tr|A0A0H3NE62|A0A0H3NE62_SALTS Probable N-acetylmuramoyl-L-alanine amidase OS=Salmonella typhimurium (strain SL1344) OX=216597 GN=amiA PE=4 SV=1	1	2	2	2	0	2	1	0	0	0	0	0	0	0	0	0	0	0	0	0	0	0	0	0	0	0	0	0	0	0	0	0	0	0	0	0	0	0	0	0	0	0	0	0
A0A0H3NE63	A0A0H3NE63	55	55	55	tr|A0A0H3NE63|A0A0H3NE63_SALTS Leucine--tRNA ligase OS=Salmonella typhimurium (strain SL1344) OX=216597 GN=leuS PE=3 SV=1	1	55	55	55	33	46	48	49	44	42	39	30	27	19	15	4	5	4	1	2	0	0	0	0	0	8	10	15	42	11	12	9	10	7	6	3	4	2	2	2	1	0	0	0
A0A0H3NE67	A0A0H3NE67	12	12	12	tr|A0A0H3NE67|A0A0H3NE67_SALTS Uncharacterized protein OS=Salmonella typhimurium (strain SL1344) OX=216597 GN=ybeL PE=4 SV=1	1	12	12	12	11	10	5	4	3	3	1	1	0	0	1	1	1	1	0	0	0	0	0	0	0	3	4	4	8	4	2	1	1	1	1	1	1	1	1	0	0	0	0	0
A0A0H3NE72	A0A0H3NE72	2	2	2	tr|A0A0H3NE72|A0A0H3NE72_SALTS Chaperone heat shock protein OS=Salmonella typhimurium (strain SL1344) OX=216597 GN=hscC PE=3 SV=1	1	2	2	2	0	1	0	0	0	0	0	0	0	0	0	0	0	0	0	0	0	0	0	0	0	1	0	0	0	1	1	0	0	0	0	0	0	0	0	0	0	0	0	0
A0A0H3NE73	A0A0H3NE73	1	1	1	tr|A0A0H3NE73|A0A0H3NE73_SALTS Ethanolamine utilization protein OS=Salmonella typhimurium (strain SL1344) OX=216597 GN=eutM PE=4 SV=1	1	1	1	1	0	0	0	0	0	0	0	0	0	0	0	0	0	0	0	0	0	0	0	0	0	0	0	0	0	0	0	1	1	0	0	0	0	0	0	0	0	0	0	0
A0A0H3NE76	A0A0H3NE76	2	2	2	tr|A0A0H3NE76|A0A0H3NE76_SALTS Glutamate/aspartate transport system permease protein GltJ OS=Salmonella typhimurium (strain SL1344) OX=216597 GN=gltJ PE=3 SV=1	1	2	2	2	0	0	0	0	0	0	0	0	0	0	0	0	0	0	0	0	0	0	0	0	1	0	0	0	0	0	0	0	0	0	0	0	0	0	0	0	0	0	0	0
A0A0H3NE79	A0A0H3NE79	24	24	24	tr|A0A0H3NE79|A0A0H3NE79_SALTS PhoH-like ATP-binding protein OS=Salmonella typhimurium (strain SL1344) OX=216597 GN=phoL PE=4 SV=1	1	24	24	24	0	4	15	16	16	14	15	15	14	14	12	5	12	8	11	10	9	9	4	1	2	4	0	4	8	6	6	7	8	6	6	6	6	3	3	3	4	2	1	2
A0A0H3NE83	A0A0H3NE83	10	10	10	tr|A0A0H3NE83|A0A0H3NE83_SALTS NagD protein OS=Salmonella typhimurium (strain SL1344) OX=216597 GN=nagD PE=4 SV=1	1	10	10	10	9	8	5	5	4	4	6	8	8	5	4	3	3	0	0	0	0	0	0	0	2	2	4	4	5	3	1	2	3	3	3	0	0	0	0	0	0	0	0	0
A0A0H3NE85	A0A0H3NE85	42	42	42	tr|A0A0H3NE85|A0A0H3NE85_SALTS Glutamine--tRNA ligase OS=Salmonella typhimurium (strain SL1344) OX=216597 GN=glnS PE=3 SV=1	1	42	42	42	32	38	32	31	29	22	21	12	6	5	4	1	2	1	1	0	0	0	0	0	0	4	12	15	28	13	6	5	3	1	1	1	1	0	1	1	1	0	0	0
A0A0H3NE87	A0A0H3NE87	16	16	16	tr|A0A0H3NE87|A0A0H3NE87_SALTS 4-hydroxy-tetrahydrodipicolinate synthase OS=Salmonella typhimurium (strain SL1344) OX=216597 GN=dapA PE=3 SV=1	1	16	16	16	9	11	13	14	14	12	9	10	7	6	7	1	3	2	3	0	1	0	0	0	0	6	3	8	14	10	9	7	6	5	5	2	1	0	0	0	0	0	0	0
A0A0H3NE89	A0A0H3NE89	14	14	14	tr|A0A0H3NE89|A0A0H3NE89_SALTS Beta-barrel assembly-enhancing protease OS=Salmonella typhimurium (strain SL1344) OX=216597 GN=bepA PE=3 SV=1	1	14	14	14	10	11	7	5	5	3	2	2	2	1	1	0	0	0	0	0	0	0	0	0	0	2	3	3	8	2	1	0	0	0	0	0	0	0	0	0	0	0	0	0
A0A0H3NE93	A0A0H3NE93	8	8	8	tr|A0A0H3NE93|A0A0H3NE93_SALTS Phosphoribosylformylglycinamidine cyclo-ligase OS=Salmonella typhimurium (strain SL1344) OX=216597 GN=purM PE=3 SV=1	1	8	8	8	4	4	4	1	2	1	1	0	0	0	0	0	0	0	0	0	0	0	0	0	0	2	3	4	6	3	3	1	1	0	0	0	0	0	0	0	0	0	0	0
A0A0H3NE94	A0A0H3NE94	11	11	11	tr|A0A0H3NE94|A0A0H3NE94_SALTS Hypothetical esterase/lipase YbfF OS=Salmonella typhimurium (strain SL1344) OX=216597 GN=ybfF PE=4 SV=1	1	11	11	11	11	10	5	3	1	1	1	2	2	2	2	0	0	0	0	0	0	0	0	0	0	2	6	5	6	4	3	3	3	3	2	1	0	0	0	0	0	0	0	0
A0A0H3NE98	A0A0H3NE98	45	45	43	tr|A0A0H3NE98|A0A0H3NE98_SALTS Ornithine decarboxylase, inducible (Ec 4.1.1.17) OS=Salmonella typhimurium (strain SL1344) OX=216597 GN=speF PE=4 SV=1	1	45	45	43	19	31	39	37	34	32	28	28	24	21	15	4	8	0	0	0	0	0	0	0	1	12	10	21	40	23	22	23	17	14	9	6	3	3	2	2	1	0	0	0
A0A0H3NE99	A0A0H3NE99	29	29	29	tr|A0A0H3NE99|A0A0H3NE99_SALTS Inosine-5-monophosphate dehydrogenase OS=Salmonella typhimurium (strain SL1344) OX=216597 GN=guaB PE=3 SV=1	1	29	29	29	1	7	18	24	23	21	18	17	15	14	8	6	2	2	2	1	0	0	0	0	0	5	0	3	21	14	12	12	11	9	9	3	3	3	1	0	0	0	0	0
A0A0H3NEA4	A0A0H3NEA4	4	4	4	tr|A0A0H3NEA4|A0A0H3NEA4_SALTS Uncharacterized protein OS=Salmonella typhimurium (strain SL1344) OX=216597 GN=ybgJ PE=4 SV=1	1	4	4	4	2	4	2	2	1	1	1	1	1	1	1	1	0	0	0	0	0	0	0	0	0	1	1	1	3	1	0	0	0	0	0	0	0	0	0	0	0	0	0	0
A0A0H3NEA5	A0A0H3NEA5	28	28	28	tr|A0A0H3NEA5|A0A0H3NEA5_SALTS Histidine--tRNA ligase OS=Salmonella typhimurium (strain SL1344) OX=216597 GN=hisS PE=3 SV=1	1	28	28	28	20	22	25	23	22	18	15	11	10	5	5	1	1	0	1	0	0	0	0	0	0	5	5	13	26	14	11	6	7	5	4	2	1	0	1	0	0	0	0	0
A0A0H3NEA9	A0A0H3NEA9	14	14	14	tr|A0A0H3NEA9|A0A0H3NEA9_SALTS Bacterioferritin comigratory protein OS=Salmonella typhimurium (strain SL1344) OX=216597 GN=bcp PE=4 SV=1	1	14	14	14	14	14	13	10	8	7	6	4	4	3	3	1	1	0	0	0	0	0	0	0	0	2	7	7	10	5	4	4	3	1	1	1	1	0	0	0	0	0	0	0
A0A0H3NEB1	A0A0H3NEB1	19	19	19	tr|A0A0H3NEB1|A0A0H3NEB1_SALTS Hypothetical lipoprotein OS=Salmonella typhimurium (strain SL1344) OX=216597 GN=SL1344_2494 PE=4 SV=1	1	19	19	19	0	0	0	0	5	5	5	2	1	1	1	0	0	0	0	0	0	0	0	0	9	1	0	0	0	0	1	3	3	0	2	1	1	1	1	1	1	1	0	0
A0A0H3NEB2	A0A0H3NEB2	4	4	4	tr|A0A0H3NEB2|A0A0H3NEB2_SALTS DnaA regulatory inactivator Hda OS=Salmonella typhimurium (strain SL1344) OX=216597 GN=yfgE PE=3 SV=1	1	4	4	4	3	4	3	0	0	0	0	0	0	0	0	0	0	0	0	0	0	0	0	0	0	0	0	0	0	0	0	0	0	0	0	0	0	0	0	0	0	0	0	0
A0A0H3NEB4	A0A0H3NEB4	40	40	40	tr|A0A0H3NEB4|A0A0H3NEB4_SALTS Polyphosphate kinase OS=Salmonella typhimurium (strain SL1344) OX=216597 GN=ppk PE=3 SV=1	1	40	40	40	1	1	1	2	13	22	22	25	24	21	16	4	11	5	9	4	7	9	11	3	7	1	1	1	1	0	1	5	10	7	8	6	6	5	4	3	4	2	2	6
A0A0H3NEB6	A0A0H3NEB6	3	3	3	tr|A0A0H3NEB6|A0A0H3NEB6_SALTS Uncharacterized protein OS=Salmonella typhimurium (strain SL1344) OX=216597 GN=yfhJ PE=4 SV=1	1	3	3	3	3	2	2	2	2	1	1	1	1	1	1	0	1	0	0	0	0	0	0	0	0	0	2	2	2	0	0	0	1	1	1	0	0	0	0	0	0	0	0	0
A0A0H3NEC0	A0A0H3NEC0	7	7	7	tr|A0A0H3NEC0|A0A0H3NEC0_SALTS Iron-sulfur cluster assembly scaffold protein IscU OS=Salmonella typhimurium (strain SL1344) OX=216597 GN=nifU PE=3 SV=1	1	7	7	7	7	6	7	6	5	5	5	3	3	1	1	1	0	0	0	0	0	0	0	0	0	2	4	2	6	4	2	1	1	1	0	0	0	0	0	0	0	0	0	0
A0A0H3NEC2	A0A0H3NEC2	40	40	40	tr|A0A0H3NEC2|A0A0H3NEC2_SALTS Succinate dehydrogenase flavoprotein subunit OS=Salmonella typhimurium (strain SL1344) OX=216597 GN=sdhA PE=3 SV=1	1	40	40	40	21	28	26	27	24	19	22	19	21	17	14	8	15	6	7	3	1	8	8	7	24	6	8	10	25	10	12	11	10	11	9	8	5	5	6	7	6	4	5	8
A0A0H3NEC5	A0A0H3NEC5	19	19	19	tr|A0A0H3NEC5|A0A0H3NEC5_SALTS GTPase Der OS=Salmonella typhimurium (strain SL1344) OX=216597 GN=engA PE=3 SV=1	1	19	19	19	7	11	11	2	2	2	1	2	3	2	3	1	3	2	5	4	5	4	1	0	9	2	2	2	5	1	1	0	0	0	0	0	0	0	0	0	0	0	0	0
A0A0H3NEC8	A0A0H3NEC8	22	22	22	tr|A0A0H3NEC8|A0A0H3NEC8_SALTS Succinate--CoA ligase [ADP-forming] subunit alpha OS=Salmonella typhimurium (strain SL1344) OX=216597 GN=sucD PE=3 SV=1	1	22	22	22	19	20	21	18	20	19	18	17	13	12	12	4	12	4	2	3	2	2	1	1	5	7	7	14	20	13	13	14	12	11	7	5	3	0	0	0	0	0	0	1
A0A0H3NEC9	A0A0H3NEC9	11	11	11	tr|A0A0H3NEC9|A0A0H3NEC9_SALTS Cytoskeleton protein RodZ OS=Salmonella typhimurium (strain SL1344) OX=216597 GN=yfgA PE=3 SV=1	1	11	11	11	1	1	0	1	0	0	0	0	1	0	0	1	0	1	0	1	0	1	0	0	9	0	0	0	0	0	0	1	1	1	1	1	0	0	0	0	0	0	0	0
A0A0H3NED0	A0A0H3NED0	2	2	2	tr|A0A0H3NED0|A0A0H3NED0_SALTS Transcriptional activator cadC OS=Salmonella typhimurium (strain SL1344) OX=216597 GN=cadC PE=4 SV=1	1	2	2	2	0	0	0	0	0	0	0	0	0	0	0	0	0	0	0	0	0	0	0	0	1	0	1	1	1	1	1	1	1	1	1	0	0	0	0	0	0	0	0	0
A0A0H3NED2	A0A0H3NED2	2	2	2	tr|A0A0H3NED2|A0A0H3NED2_SALTS Uncharacterized protein OS=Salmonella typhimurium (strain SL1344) OX=216597 GN=ybgC PE=4 SV=1	1	2	2	2	2	2	2	1	1	1	0	0	0	0	0	0	0	0	0	0	0	0	0	0	0	0	0	0	0	0	0	0	0	0	0	0	0	0	0	0	0	0	0	0
A0A0H3NED3	A0A0H3NED3	12	12	12	tr|A0A0H3NED3|A0A0H3NED3_SALTS Hypothetical transcriptional regulator OS=Salmonella typhimurium (strain SL1344) OX=216597 GN=yfhA PE=4 SV=1	1	12	12	12	6	9	2	0	0	0	0	0	0	0	0	0	0	0	0	1	0	1	1	0	4	2	0	0	0	0	0	0	0	0	0	0	1	1	0	0	0	0	0	1
A0A0H3NED6	A0A0H3NED6	4	4	4	tr|A0A0H3NED6|A0A0H3NED6_SALTS tRNA-specific adenosine deaminase OS=Salmonella typhimurium (strain SL1344) OX=216597 GN=yfhC PE=3 SV=1	1	4	4	4	2	3	0	0	0	0	0	0	0	0	0	0	0	0	0	0	0	0	0	0	0	0	0	0	1	0	0	0	0	0	0	0	0	0	0	0	0	0	0	0
A0A0H3NED8	A0A0H3NED8	11	11	11	tr|A0A0H3NED8|A0A0H3NED8_SALTS Peptidoglycan-associated protein OS=Salmonella typhimurium (strain SL1344) OX=216597 GN=pal PE=3 SV=1	1	11	11	11	4	2	2	1	1	1	0	0	1	2	2	2	2	2	3	3	2	2	1	0	8	1	2	1	2	0	0	2	2	1	1	0	0	0	1	1	0	0	0	0
A0A0H3NEE0	A0A0H3NEE0	32	32	32	tr|A0A0H3NEE0|A0A0H3NEE0_SALTS Chaperone protein HscA OS=Salmonella typhimurium (strain SL1344) OX=216597 GN=hscA PE=3 SV=1	1	32	32	32	20	24	22	21	18	14	14	5	2	1	0	0	0	0	0	0	0	0	0	0	1	7	10	9	20	8	7	6	3	2	2	1	1	1	0	0	0	0	0	0
A0A0H3NEE2	A0A0H3NEE2	16	16	16	tr|A0A0H3NEE2|A0A0H3NEE2_SALTS Pyridoxine 5-phosphate synthase OS=Salmonella typhimurium (strain SL1344) OX=216597 GN=pdxJ PE=3 SV=1	1	16	16	16	0	0	12	13	13	12	11	9	7	5	4	1	1	0	0	0	0	0	0	0	0	4	0	1	9	8	8	8	8	4	4	2	2	1	0	0	0	0	0	0
A0A0H3NEE3	A0A0H3NEE3	6	6	6	tr|A0A0H3NEE3|A0A0H3NEE3_SALTS HTH-type transcriptional regulator IscR OS=Salmonella typhimurium (strain SL1344) OX=216597 GN=yfhP PE=3 SV=1	1	6	6	6	5	6	6	4	5	2	2	2	2	1	1	1	0	0	0	0	0	0	0	0	1	1	1	1	2	0	0	0	0	1	1	0	1	1	1	0	0	0	0	0
A0A0H3NEE4	A0A0H3NEE4	6	6	6	tr|A0A0H3NEE4|A0A0H3NEE4_SALTS Hypothetical exported protein OS=Salmonella typhimurium (strain SL1344) OX=216597 GN=ybgS PE=4 SV=1	1	6	6	6	6	6	4	3	2	1	1	0	0	0	0	0	0	0	0	0	0	0	0	0	0	0	0	0	2	0	0	0	0	0	0	0	0	0	0	0	0	0	0	0
A0A0H3NEE6	A0A0H3NEE6	28	28	28	tr|A0A0H3NEE6|A0A0H3NEE6_SALTS Elongation factor 4 OS=Salmonella typhimurium (strain SL1344) OX=216597 GN=lepA PE=3 SV=1	1	28	28	28	10	16	15	13	11	8	10	9	7	8	7	5	5	5	6	3	3	4	1	2	16	6	1	3	10	1	2	2	2	2	2	2	2	1	2	0	2	1	1	4
A0A0H3NEE7	A0A0H3NEE7	11	11	11	tr|A0A0H3NEE7|A0A0H3NEE7_SALTS Anaerobic sulfite reductase subunit B OS=Salmonella typhimurium (strain SL1344) OX=216597 GN=asrB PE=4 SV=1	1	11	11	11	8	5	1	0	0	0	0	0	0	0	0	0	0	0	0	0	0	0	0	0	0	1	2	3	4	2	2	2	1	1	1	1	1	1	0	0	0	0	0	0
A0A0H3NEF6	A0A0H3NEF6	41	41	41	tr|A0A0H3NEF6|A0A0H3NEF6_SALTS Lysine decarboxylase OS=Salmonella typhimurium (strain SL1344) OX=216597 GN=cadA PE=4 SV=1	1	41	41	41	0	0	4	4	11	27	36	39	38	31	24	10	9	1	0	0	0	0	0	0	0	2	0	0	0	1	3	9	14	15	15	12	11	7	3	1	2	0	0	0
A0A0H3NEG0	A0A0H3NEG0	16	16	16	tr|A0A0H3NEG0|A0A0H3NEG0_SALTS Galactose-1-phosphate uridylyltransferase OS=Salmonella typhimurium (strain SL1344) OX=216597 GN=galT PE=3 SV=1	1	16	16	16	9	13	13	11	11	11	8	7	6	4	3	2	0	0	0	0	0	0	0	0	0	1	2	3	12	3	1	1	0	0	0	0	0	0	0	0	0	0	0	0
A0A0H3NEG3	A0A0H3NEG3	3	3	3	tr|A0A0H3NEG3|A0A0H3NEG3_SALTS Hypothetical PTS system IIBC component OS=Salmonella typhimurium (strain SL1344) OX=216597 GN=SL1344_2532 PE=4 SV=1	1	3	3	3	0	0	0	0	2	1	1	1	1	1	2	0	0	0	0	0	0	0	0	0	0	0	0	0	0	0	0	0	0	0	0	0	0	0	0	0	0	0	0	0
A0A0H3NEG4	A0A0H3NEG4	22	22	22	tr|A0A0H3NEG4|A0A0H3NEG4_SALTS Predicted bacteriophage protein OS=Salmonella typhimurium (strain SL1344) OX=216597 GN=SL1344_1969 PE=4 SV=1	1	22	22	22	0	0	0	0	7	10	16	21	22	22	22	9	16	5	3	0	0	0	0	0	0	1	0	0	0	0	1	1	3	6	7	7	7	6	5	3	2	1	1	1
A0A0H3NEG6	A0A0H3NEG6	2	2	2	tr|A0A0H3NEG6|A0A0H3NEG6_SALTS Predicted bacteriophage protein OS=Salmonella typhimurium (strain SL1344) OX=216597 GN=SL1344_1974 PE=4 SV=1	1	2	2	2	0	0	2	1	1	1	0	0	0	0	0	0	0	0	0	0	0	0	0	0	0	0	0	0	2	0	0	0	0	0	0	0	0	0	0	0	0	0	0	0
A0A0H3NEG7	A0A0H3NEG7	16	16	16	tr|A0A0H3NEG7|A0A0H3NEG7_SALTS 6-phosphogluconolactonase OS=Salmonella typhimurium (strain SL1344) OX=216597 GN=ybhE PE=3 SV=1	1	16	16	16	16	16	15	11	12	11	6	6	5	4	4	1	2	1	0	0	0	0	0	0	0	7	8	8	15	6	5	5	4	4	4	2	2	3	3	1	2	0	0	0
A0A0H3NEG9	A0A0H3NEG9	2	2	2	tr|A0A0H3NEG9|A0A0H3NEG9_SALTS Predicted bacteriophage tail protein OS=Salmonella typhimurium (strain SL1344) OX=216597 GN=SL1344_2569 PE=4 SV=1	1	2	2	2	2	1	0	0	0	0	0	0	0	0	0	0	0	0	0	0	0	0	0	0	0	0	0	0	0	0	0	0	0	0	0	0	0	0	0	0	0	0	0	0
A0A0H3NEH2	A0A0H3NEH2	23	23	23	tr|A0A0H3NEH2|A0A0H3NEH2_SALTS Urocanate hydratase OS=Salmonella typhimurium (strain SL1344) OX=216597 GN=hutU PE=3 SV=1	1	23	23	23	0	14	19	19	18	12	9	5	3	3	1	1	0	0	0	0	0	0	0	0	0	1	0	7	19	5	6	6	5	4	1	0	0	0	0	0	0	0	0	0
A0A0H3NEH3	A0A0H3NEH3	9	9	9	tr|A0A0H3NEH3|A0A0H3NEH3_SALTS GTPase Era OS=Salmonella typhimurium (strain SL1344) OX=216597 GN=era PE=3 SV=1	1	9	9	9	8	8	4	3	2	1	1	0	0	0	0	0	0	0	0	0	0	0	0	0	0	1	4	2	5	1	1	1	1	0	0	0	0	0	0	0	0	0	0	0
A0A0H3NEH6	A0A0H3NEH6	7	7	7	tr|A0A0H3NEH6|A0A0H3NEH6_SALTS Predicted bacteriophage protein OS=Salmonella typhimurium (strain SL1344) OX=216597 GN=SL1344_2574 PE=4 SV=1	1	7	7	7	6	3	1	0	0	0	0	0	0	0	0	0	0	0	0	0	0	0	0	0	0	2	3	3	1	1	0	1	1	1	1	0	0	0	0	0	0	0	1	1
A0A0H3NEI1	A0A0H3NEI1	1	1	1	tr|A0A0H3NEI1|A0A0H3NEI1_SALTS Predicted antitermination protein OS=Salmonella typhimurium (strain SL1344) OX=216597 GN=SL1344_2579 PE=4 SV=1	1	1	1	1	0	0	0	0	0	1	1	1	1	1	0	0	0	0	0	0	0	0	0	0	0	0	0	0	0	0	0	0	0	0	0	0	0	0	0	0	0	0	0	0
A0A0H3NEI2	A0A0H3NEI2	12	12	12	tr|A0A0H3NEI2|A0A0H3NEI2_SALTS Cobyric acid synthase OS=Salmonella typhimurium (strain SL1344) OX=216597 GN=cbiP PE=3 SV=1	1	12	12	12	6	9	4	2	1	2	0	2	2	2	1	0	0	0	1	0	0	0	0	0	1	1	3	3	3	3	3	2	2	2	1	0	0	0	0	0	0	0	0	0
A0A0H3NEI6	A0A0H3NEI6	11	11	11	tr|A0A0H3NEI6|A0A0H3NEI6_SALTS Cobalt-precorrin-2 C(20)-methyltransferase OS=Salmonella typhimurium (strain SL1344) OX=216597 GN=cbiL PE=3 SV=1	1	11	11	11	11	11	10	9	9	7	4	3	2	1	1	1	0	0	0	0	0	0	0	0	0	5	8	8	9	7	5	3	2	2	0	0	0	0	0	0	0	0	0	0
A0A0H3NEI7	A0A0H3NEI7	5	5	5	tr|A0A0H3NEI7|A0A0H3NEI7_SALTS Predicted bacteriophage protein OS=Salmonella typhimurium (strain SL1344) OX=216597 GN=SL1344_2561 PE=4 SV=1	1	5	5	5	4	0	0	0	0	0	0	1	2	2	2	1	3	2	3	1	2	1	0	0	0	1	1	1	0	0	0	0	0	1	1	1	1	1	1	1	1	1	1	1
A0A0H3NEI9	A0A0H3NEI9	11	11	11	tr|A0A0H3NEI9|A0A0H3NEI9_SALTS Precorrin-4 C11-methyltransferase OS=Salmonella typhimurium (strain SL1344) OX=216597 GN=cbiF PE=3 SV=1	1	11	11	11	11	10	11	9	7	7	5	4	3	2	2	1	1	0	0	0	0	0	0	0	1	3	3	4	9	4	3	3	3	2	2	1	0	0	0	0	0	0	0	0
A0A0H3NEJ0	A0A0H3NEJ0	1	1	1	tr|A0A0H3NEJ0|A0A0H3NEJ0_SALTS Predicted bacteriophage protein OS=Salmonella typhimurium (strain SL1344) OX=216597 GN=SL1344_2566 PE=4 SV=1	1	1	1	1	1	0	0	0	0	0	0	0	0	0	0	0	0	0	0	0	0	0	0	0	0	0	0	0	0	0	0	0	0	0	0	0	0	0	0	0	0	0	0	0
A0A0H3NEJ1	A0A0H3NEJ1	21	21	21	tr|A0A0H3NEJ1|A0A0H3NEJ1_SALTS Predicted bacteriophage protein OS=Salmonella typhimurium (strain SL1344) OX=216597 GN=SL1344_2594 PE=4 SV=1	1	21	21	21	19	20	20	20	19	18	18	18	15	15	15	6	11	3	7	3	5	8	6	1	14	9	8	12	18	10	11	8	8	7	5	5	4	2	2	1	1	1	2	6
A0A0H3NEJ3	A0A0H3NEJ3	13	13	13	tr|A0A0H3NEJ3|A0A0H3NEJ3_SALTS Putative gluconeogenesis factor OS=Salmonella typhimurium (strain SL1344) OX=216597 GN=ybhK PE=3 SV=1	1	13	13	13	2	9	9	4	4	0	0	0	0	0	0	0	0	0	0	0	0	0	0	0	0	0	1	1	5	2	1	0	0	0	0	0	0	0	0	0	0	0	0	1
A0A0H3NEJ8	A0A0H3NEJ8	6	6	6	tr|A0A0H3NEJ8|A0A0H3NEJ8_SALTS Hypothetical propanediol utilization protein PduB OS=Salmonella typhimurium (strain SL1344) OX=216597 GN=pduB PE=4 SV=1	1	6	6	6	1	0	0	1	2	2	2	2	2	0	0	0	0	0	1	1	1	0	0	0	1	0	0	0	0	0	1	2	1	0	0	0	0	0	0	0	0	0	0	0
A0A0H3NEJ9	A0A0H3NEJ9	11	11	11	tr|A0A0H3NEJ9|A0A0H3NEJ9_SALTS Molybdopterin converting factor, subunit 2 OS=Salmonella typhimurium (strain SL1344) OX=216597 GN=moaE PE=4 SV=1	1	11	11	11	8	9	6	6	5	3	1	1	0	0	0	0	0	0	0	0	0	0	0	0	0	2	2	3	8	3	1	1	1	0	0	0	0	0	0	0	0	0	0	0
A0A0H3NEK9	A0A0H3NEK9	1	1	1	tr|A0A0H3NEK9|A0A0H3NEK9_SALTS Hypothetical propanediol utilization protein OS=Salmonella typhimurium (strain SL1344) OX=216597 GN=pduT PE=4 SV=1	1	1	1	1	0	0	0	0	0	0	0	1	1	1	0	0	0	0	0	0	0	0	0	0	0	0	0	0	0	0	0	0	0	0	0	0	0	0	0	0	0	0	0	0
A0A0H3NEL2	A0A0H3NEL2	4	4	4	tr|A0A0H3NEL2|A0A0H3NEL2_SALTS Exodeoxyribonuclease VIII OS=Salmonella typhimurium (strain SL1344) OX=216597 GN=recEb PE=4 SV=1	1	4	4	4	1	0	1	1	2	2	2	1	1	0	0	0	0	0	0	0	0	0	0	0	0	0	1	1	0	0	0	0	0	0	0	0	0	0	0	0	0	0	0	0
A0A0H3NEL3	A0A0H3NEL3	10	10	10	tr|A0A0H3NEL3|A0A0H3NEL3_SALTS UPF0265 protein YeeX OS=Salmonella typhimurium (strain SL1344) OX=216597 GN=yeeX PE=3 SV=1	1	10	10	10	5	7	7	10	8	7	6	4	3	2	2	1	1	1	0	0	0	0	0	0	1	1	0	5	7	6	5	4	1	2	0	0	1	1	0	1	1	1	1	0
A0A0H3NEL4	A0A0H3NEL4	20	18	18	tr|A0A0H3NEL4|A0A0H3NEL4_SALTS Autonomous glycyl radical cofactor OS=Salmonella typhimurium (strain SL1344) OX=216597 GN=yfiD PE=3 SV=1	1	20	18	18	19	17	17	17	17	17	15	13	13	10	10	3	4	2	3	1	1	2	1	0	0	7	11	12	18	10	7	6	5	4	5	4	3	3	2	1	1	1	1	1
A0A0H3NEL7	A0A0H3NEL7	5	5	5	tr|A0A0H3NEL7|A0A0H3NEL7_SALTS Sigma-E factor regulatory protein RseB OS=Salmonella typhimurium (strain SL1344) OX=216597 GN=rseB PE=4 SV=1	1	5	5	5	2	5	3	1	0	0	0	0	0	0	0	0	0	0	0	0	0	0	0	0	0	0	0	0	1	0	0	0	0	0	0	0	0	0	0	0	0	0	0	0
A0A0H3NEL8	A0A0H3NEL8	11	11	11	tr|A0A0H3NEL8|A0A0H3NEL8_SALTS Thiosulfate reductase electron transport protein PhsB OS=Salmonella typhimurium (strain SL1344) OX=216597 GN=phsB PE=4 SV=1	1	11	11	11	10	11	10	9	10	7	9	7	5	3	2	0	0	0	0	0	0	0	0	0	3	0	1	1	10	1	1	0	1	1	0	0	0	0	0	0	0	0	0	0
A0A0H3NEM0	A0A0H3NEM0	22	22	22	tr|A0A0H3NEM0|A0A0H3NEM0_SALTS Hypothetical acyl-CoA synthetase OS=Salmonella typhimurium (strain SL1344) OX=216597 GN=yfiQ PE=4 SV=1	1	22	22	22	1	10	12	13	13	6	5	3	2	1	1	1	0	0	0	0	0	0	0	0	0	2	0	4	14	6	2	2	1	1	0	0	0	0	0	0	0	0	0	0
A0A0H3NEM2	A0A0H3NEM2	18	18	18	tr|A0A0H3NEM2|A0A0H3NEM2_SALTS ATP-dependent RNA helicase SrmB OS=Salmonella typhimurium (strain SL1344) OX=216597 GN=srmB PE=3 SV=1	1	18	18	18	1	1	1	2	6	7	10	10	10	8	10	3	4	1	1	0	0	1	1	1	10	1	0	0	0	0	0	0	0	1	1	2	1	0	0	0	0	0	0	1
A0A0H3NEM4	A0A0H3NEM4	85	85	85	tr|A0A0H3NEM4|A0A0H3NEM4_SALTS Chaperone protein ClpB OS=Salmonella typhimurium (strain SL1344) OX=216597 GN=clpB PE=3 SV=1	1	85	85	85	62	69	70	68	67	56	54	47	40	38	36	17	31	18	15	12	10	17	10	6	32	18	20	27	60	24	21	23	23	12	11	7	10	9	9	9	10	10	8	12
A0A0H3NEM6	A0A0H3NEM6	14	14	14	tr|A0A0H3NEM6|A0A0H3NEM6_SALTS Histidine biosynthesis bifunctional protein HisB OS=Salmonella typhimurium (strain SL1344) OX=216597 GN=hisB PE=3 SV=1	1	14	14	14	0	1	9	11	9	9	6	6	6	3	4	1	2	1	1	1	0	0	0	0	0	2	0	0	5	4	4	5	4	3	3	2	0	2	1	1	0	0	0	0
A0A0H3NEM7	A0A0H3NEM7	8	8	8	tr|A0A0H3NEM7|A0A0H3NEM7_SALTS Outer membrane protein x OS=Salmonella typhimurium (strain SL1344) OX=216597 GN=ompX PE=4 SV=1	1	8	8	8	0	1	2	2	2	1	2	3	2	3	4	2	2	2	1	2	0	2	1	2	5	0	0	0	1	0	0	0	2	2	2	2	3	2	2	2	2	2	2	2
A0A0H3NEM8	A0A0H3NEM8	11	11	11	tr|A0A0H3NEM8|A0A0H3NEM8_SALTS Hypothetical RNA methyltransferase OS=Salmonella typhimurium (strain SL1344) OX=216597 GN=yfiF PE=3 SV=1	1	11	11	11	3	2	2	1	2	1	1	1	2	1	1	0	0	0	0	0	1	1	0	0	7	0	0	0	0	0	0	0	0	0	0	0	0	0	0	0	0	0	0	0
A0A0H3NEN0	A0A0H3NEN0	11	11	11	tr|A0A0H3NEN0|A0A0H3NEN0_SALTS Chorismate mutase-P/prephenate dehydratase OS=Salmonella typhimurium (strain SL1344) OX=216597 GN=pheA PE=4 SV=1	1	11	11	11	1	7	10	11	11	9	7	2	2	1	1	0	0	0	0	0	0	0	0	0	0	3	0	3	8	2	1	1	0	0	0	0	0	1	1	1	1	0	1	1
A0A0H3NEN1	A0A0H3NEN1	9	9	9	tr|A0A0H3NEN1|A0A0H3NEN1_SALTS Lipopolysaccharide O-antigen chain length regulator OS=Salmonella typhimurium (strain SL1344) OX=216597 GN=wzzB PE=4 SV=1	1	9	9	9	0	0	0	0	0	0	0	0	0	1	1	0	1	2	2	2	2	1	0	0	8	0	0	0	0	0	0	0	0	0	0	0	0	0	0	0	0	0	0	0
A0A0H3NEN3	A0A0H3NEN3	23	23	23	tr|A0A0H3NEN3|A0A0H3NEN3_SALTS ABC transporter ATP-binding protein OS=Salmonella typhimurium (strain SL1344) OX=216597 GN=ybiT PE=4 SV=1	1	23	23	23	13	18	13	13	7	6	3	1	0	0	0	0	0	0	0	0	0	0	0	0	0	1	4	3	11	4	3	2	2	2	2	2	1	0	0	0	0	0	0	0
A0A0H3NEN6	A0A0H3NEN6	20	20	20	tr|A0A0H3NEN6|A0A0H3NEN6_SALTS Mannose-1-phosphate guanylyltransferase OS=Salmonella typhimurium (strain SL1344) OX=216597 GN=cpsB2 PE=3 SV=1	1	20	20	20	5	16	15	15	13	9	8	5	3	2	0	0	1	0	0	0	0	0	0	0	0	2	1	3	12	4	2	2	2	0	1	0	0	0	0	0	0	0	0	0
A0A0H3NEN7	A0A0H3NEN7	13	13	13	tr|A0A0H3NEN7|A0A0H3NEN7_SALTS Pseudouridine synthase OS=Salmonella typhimurium (strain SL1344) OX=216597 GN=rluD PE=3 SV=1	1	13	13	13	9	10	7	6	6	4	2	2	2	1	0	0	0	0	0	0	0	0	0	0	0	2	3	3	5	3	4	2	2	2	2	1	2	3	2	1	1	1	0	0
A0A0H3NEN8	A0A0H3NEN8	18	18	18	tr|A0A0H3NEN8|A0A0H3NEN8_SALTS CDP-abequose synthase OS=Salmonella typhimurium (strain SL1344) OX=216597 GN=rfbJ PE=4 SV=1	1	18	18	18	12	13	12	7	5	4	2	0	0	0	0	0	0	0	0	0	0	0	0	0	0	4	8	10	10	8	6	1	0	0	0	0	0	0	0	0	0	0	0	0
A0A0H3NEP1	A0A0H3NEP1	6	6	6	tr|A0A0H3NEP1|A0A0H3NEP1_SALTS T-protein OS=Salmonella typhimurium (strain SL1344) OX=216597 GN=tyrA PE=4 SV=1	1	6	6	6	0	3	2	2	0	0	0	0	0	0	0	0	0	0	0	0	0	0	0	0	0	0	0	0	4	0	0	0	0	0	0	0	0	0	0	0	0	0	0	0
A0A0H3NEP5	A0A0H3NEP5	11	11	11	tr|A0A0H3NEP5|A0A0H3NEP5_SALTS dTDP-4-dehydrorhamnose 3,5-epimerase OS=Salmonella typhimurium (strain SL1344) OX=216597 GN=rfbC PE=3 SV=1	1	11	11	11	10	9	7	7	6	3	3	1	0	0	0	0	0	0	0	0	0	0	0	0	0	3	6	7	10	4	3	3	3	2	2	1	1	0	0	0	0	0	0	0
A0A0H3NEP6	A0A0H3NEP6	6	6	6	tr|A0A0H3NEP6|A0A0H3NEP6_SALTS Hypothetical exported protein OS=Salmonella typhimurium (strain SL1344) OX=216597 GN=SL1344_2632 PE=4 SV=1	1	6	6	6	6	5	5	5	5	5	4	3	2	3	3	1	0	0	0	0	0	0	0	0	0	1	2	1	5	2	1	1	1	1	1	0	0	0	0	0	0	0	0	0
A0A0H3NEP7	A0A0H3NEP7	2	2	2	tr|A0A0H3NEP7|A0A0H3NEP7_SALTS Hypothetical ABC transporter ATP-binding protein OS=Salmonella typhimurium (strain SL1344) OX=216597 GN=yliA PE=3 SV=1	1	2	2	2	0	0	0	0	0	0	0	1	1	0	0	0	0	0	0	0	0	0	0	0	0	0	0	0	0	0	0	0	0	0	0	0	0	0	0	0	0	0	0	0
A0A0H3NEQ4	A0A0H3NEQ4	20	20	20	tr|A0A0H3NEQ4|A0A0H3NEQ4_SALTS Signal recognition particle protein OS=Salmonella typhimurium (strain SL1344) OX=216597 GN=ffh PE=3 SV=1	1	20	20	20	1	13	15	14	10	8	7	5	4	5	4	2	2	1	1	1	1	4	6	4	11	4	0	0	0	1	1	1	1	2	2	2	3	1	1	2	2	2	2	7
A0A0H3NER0	A0A0H3NER0	7	7	7	tr|A0A0H3NER0|A0A0H3NER0_SALTS NAD kinase OS=Salmonella typhimurium (strain SL1344) OX=216597 GN=ppnK PE=3 SV=1	1	7	7	7	1	3	3	4	3	2	2	2	0	0	0	0	0	0	0	0	0	0	0	0	0	1	1	1	6	1	1	1	1	1	1	1	0	0	0	0	0	0	0	0
A0A0H3NER1	A0A0H3NER1	8	8	8	tr|A0A0H3NER1|A0A0H3NER1_SALTS tRNA (guanine-N(1)-)-methyltransferase OS=Salmonella typhimurium (strain SL1344) OX=216597 GN=trmD PE=3 SV=1	1	8	8	8	7	8	6	1	2	1	1	0	0	0	0	0	0	0	0	0	0	0	0	0	0	1	1	1	3	1	0	0	0	0	0	0	0	0	0	0	0	0	0	0
A0A0H3NER3	A0A0H3NER3	11	11	11	tr|A0A0H3NER3|A0A0H3NER3_SALTS SsrA-binding protein OS=Salmonella typhimurium (strain SL1344) OX=216597 GN=smpB PE=3 SV=1	1	11	11	11	0	0	0	1	1	2	4	5	5	5	3	1	7	1	1	1	1	6	5	1	5	0	0	0	0	1	1	2	1	1	1	1	1	1	1	0	0	1	0	5
A0A0H3NER6	A0A0H3NER6	17	17	16	tr|A0A0H3NER6|A0A0H3NER6_SALTS D-alanyl-D-alanine carboxypeptidase (Penicillin-binding protein 6) OS=Salmonella typhimurium (strain SL1344) OX=216597 GN=dacC PE=3 SV=1	1	17	17	16	0	0	0	0	0	0	0	0	0	0	0	0	0	0	1	1	1	0	0	0	10	0	0	0	0	0	0	0	0	0	0	0	0	0	0	0	0	0	0	0
A0A0H3NER8	A0A0H3NER8	3	3	3	tr|A0A0H3NER8|A0A0H3NER8_SALTS Hypothetical membrane protein OS=Salmonella typhimurium (strain SL1344) OX=216597 GN=corB PE=4 SV=1	1	3	3	3	0	0	0	0	0	0	0	0	0	0	0	0	0	0	0	0	0	0	0	0	1	0	0	0	0	0	0	0	0	0	0	0	0	0	1	1	1	1	1	1
A0A0H3NER9	A0A0H3NER9	2	2	2	tr|A0A0H3NER9|A0A0H3NER9_SALTS Outer membrane protein assembly factor BamE OS=Salmonella typhimurium (strain SL1344) OX=216597 GN=smpA PE=3 SV=1	1	2	2	2	0	0	0	0	0	0	0	0	0	0	0	0	1	0	0	0	0	0	0	0	0	0	0	0	0	0	0	0	0	0	0	0	0	0	0	0	0	0	0	0
A0A0H3NES4;A0A0H3NE64	A0A0H3NES4	3;1	3;1	3;1	tr|A0A0H3NES4|A0A0H3NES4_SALTS Hypothetical bacteriophage tail fibre protein OS=Salmonella typhimurium (strain SL1344) OX=216597 GN=SL1344_2675 PE=4 SV=1	2	3	3	3	3	1	1	1	0	0	0	0	0	0	0	0	0	0	0	0	0	0	0	0	0	0	0	0	1	0	0	0	0	0	0	0	0	0	0	0	0	0	0	0
A0A0H3NEU4	A0A0H3NEU4	1	1	1	tr|A0A0H3NEU4|A0A0H3NEU4_SALTS Hypothetical sugar kinase OS=Salmonella typhimurium (strain SL1344) OX=216597 GN=yegV PE=4 SV=1	1	1	1	1	1	1	1	0	0	0	0	0	0	0	0	0	0	0	0	0	0	0	0	0	0	0	0	0	0	0	0	0	0	0	0	0	0	0	0	0	0	0	0	0
A0A0H3NEU5	A0A0H3NEU5	16	16	16	tr|A0A0H3NEU5|A0A0H3NEU5_SALTS Hypothetical competence protein OS=Salmonella typhimurium (strain SL1344) OX=216597 GN=SL1344_2695 PE=4 SV=1	1	16	16	16	3	2	3	0	0	1	7	10	11	9	4	1	1	0	0	0	0	0	0	0	1	1	0	0	0	0	0	0	3	3	3	3	1	0	0	0	0	0	0	0
A0A0H3NEU6	A0A0H3NEU6	21	21	21	tr|A0A0H3NEU6|A0A0H3NEU6_SALTS Arginine-binding periplasmic protein 1 OS=Salmonella typhimurium (strain SL1344) OX=216597 GN=artI PE=3 SV=1	1	21	21	21	21	20	15	13	15	11	11	10	8	4	3	3	2	2	1	1	1	0	0	0	0	8	11	14	18	6	6	6	6	5	5	3	2	1	1	1	1	0	0	0
A0A0H3NEV1	A0A0H3NEV1	7	7	7	tr|A0A0H3NEV1|A0A0H3NEV1_SALTS Hypothetical oxidoreductase OS=Salmonella typhimurium (strain SL1344) OX=216597 GN=SL1344_0871 PE=4 SV=1	1	7	7	7	1	1	0	0	0	1	4	7	7	4	0	0	0	0	0	0	0	0	0	0	0	0	0	0	0	0	0	0	1	1	1	0	0	0	0	0	0	0	0	0
A0A0H3NEV4	A0A0H3NEV4	9	9	9	tr|A0A0H3NEV4|A0A0H3NEV4_SALTS Iron-sulfur cluster carrier protein OS=Salmonella typhimurium (strain SL1344) OX=216597 GN=mrp PE=3 SV=1	1	9	9	9	8	8	8	7	7	4	5	3	3	2	2	1	2	1	2	1	0	2	2	1	2	1	2	4	7	3	3	3	2	1	1	1	1	1	1	1	1	1	1	1
A0A0H3NEV7	A0A0H3NEV7	8	8	8	tr|A0A0H3NEV7|A0A0H3NEV7_SALTS Hydroxylamine reductase OS=Salmonella typhimurium (strain SL1344) OX=216597 GN=hcp PE=3 SV=1	1	8	8	8	4	7	4	2	3	0	1	0	0	0	0	0	0	0	0	0	0	0	0	0	0	0	1	1	1	0	0	0	0	0	0	0	0	0	0	0	0	0	0	0
A0A0H3NEW0	A0A0H3NEW0	8	8	8	tr|A0A0H3NEW0|A0A0H3NEW0_SALTS Uncharacterized protein OS=Salmonella typhimurium (strain SL1344) OX=216597 GN=SL1344_2710 PE=4 SV=1	1	8	8	8	0	0	0	0	0	0	6	6	8	4	4	1	1	0	0	0	0	0	0	0	2	1	0	0	0	0	0	0	0	0	0	0	0	0	0	0	0	0	0	0
A0A0H3NEW1	A0A0H3NEW1	11	11	11	tr|A0A0H3NEW1|A0A0H3NEW1_SALTS Hypothetical two-component system response regulator OS=Salmonella typhimurium (strain SL1344) OX=216597 GN=yehT PE=4 SV=1	1	11	11	11	9	6	3	1	0	0	0	0	0	0	0	0	0	0	0	0	0	0	0	1	1	1	2	1	1	1	0	0	0	0	0	0	0	0	0	0	0	0	0	0
A0A0H3NEX0	A0A0H3NEX0	32	32	32	tr|A0A0H3NEX0|A0A0H3NEX0_SALTS Uncharacterized protein OS=Salmonella typhimurium (strain SL1344) OX=216597 GN=SL1344_2713 PE=4 SV=1	1	32	32	32	3	9	11	16	22	24	26	24	20	16	11	2	1	1	1	0	0	1	0	0	3	3	0	0	5	2	3	3	8	5	3	3	2	2	0	1	0	0	0	0
A0A0H3NEX7	A0A0H3NEX7	3	3	3	tr|A0A0H3NEX7|A0A0H3NEX7_SALTS Hypothetical n-hydroxybenzoate hydroxylase OS=Salmonella typhimurium (strain SL1344) OX=216597 GN=SL1344_2152 PE=4 SV=1	1	3	3	3	1	1	1	1	0	0	0	0	0	0	0	0	0	0	0	0	0	0	0	0	0	0	0	2	0	0	0	0	0	0	0	0	0	0	0	0	0	0	0	0
A0A0H3NEX8	A0A0H3NEX8	18	18	18	tr|A0A0H3NEX8|A0A0H3NEX8_SALTS Leucine-responsive regulatory protein OS=Salmonella typhimurium (strain SL1344) OX=216597 GN=lrp PE=4 SV=1	1	18	18	18	13	14	13	14	14	14	16	12	11	10	8	1	2	0	1	0	0	0	0	0	6	2	3	3	16	6	2	1	2	1	1	1	0	0	0	0	0	0	1	2
A0A0H3NEY2	A0A0H3NEY2	24	24	24	tr|A0A0H3NEY2|A0A0H3NEY2_SALTS Hypothetical ATPase OS=Salmonella typhimurium (strain SL1344) OX=216597 GN=SL1344_2730 PE=4 SV=1	1	24	24	24	2	10	14	20	19	18	16	7	7	4	3	2	2	3	3	3	3	1	0	0	7	5	1	4	19	12	11	9	7	3	2	2	0	0	0	0	0	0	0	0
A0A0H3NEY3;A0A0H3NGK9	A0A0H3NEY3	35;2	35;2	32;0	tr|A0A0H3NEY3|A0A0H3NEY3_SALTS Anaerobic dimethyl sulfoxide reductase chain A OS=Salmonella typhimurium (strain SL1344) OX=216597 GN=dmsA PE=3 SV=1	2	35	35	32	3	17	26	22	21	13	9	4	2	0	2	0	0	0	0	0	0	0	0	0	9	1	0	4	18	4	2	2	0	0	0	0	0	0	0	0	0	0	0	0
A0A0H3NEY4	A0A0H3NEY4	11	11	11	tr|A0A0H3NEY4|A0A0H3NEY4_SALTS Hypothetical hexulose 6 phosphate synthase OS=Salmonella typhimurium (strain SL1344) OX=216597 GN=SL1344_2738 PE=4 SV=1	1	11	11	11	2	8	3	2	2	1	0	0	0	0	0	0	0	1	0	0	0	0	0	0	0	0	1	1	5	1	1	0	0	0	0	0	0	0	0	0	0	0	0	0
A0A0H3NEY8	A0A0H3NEY8	18	18	18	tr|A0A0H3NEY8|A0A0H3NEY8_SALTS Pyruvate formate-lyase-activating enzyme OS=Salmonella typhimurium (strain SL1344) OX=216597 GN=pflA PE=3 SV=1	1	18	18	18	16	15	11	7	7	4	1	1	1	0	0	0	0	0	0	0	0	0	0	0	0	2	4	5	12	3	3	4	1	1	0	0	0	0	0	0	0	0	0	0
A0A0H3NEZ1	A0A0H3NEZ1	29	29	29	tr|A0A0H3NEZ1|A0A0H3NEZ1_SALTS D-galactose-binding periplasmic protein OS=Salmonella typhimurium (strain SL1344) OX=216597 GN=mglB PE=4 SV=1	1	29	29	29	29	28	26	22	21	21	21	17	17	14	13	2	12	2	3	2	1	2	1	1	1	8	11	13	24	5	5	5	4	5	5	5	3	2	2	2	2	2	2	1
A0A0H3NEZ4	A0A0H3NEZ4	1	1	1	tr|A0A0H3NEZ4|A0A0H3NEZ4_SALTS Uncharacterized protein OS=Salmonella typhimurium (strain SL1344) OX=216597 GN=SL1344_2751 PE=4 SV=1	1	1	1	1	0	0	0	0	0	0	1	1	0	0	0	0	0	0	0	0	0	0	0	0	0	0	0	0	0	0	0	0	0	0	0	0	0	0	0	0	0	0	0	0
A0A0H3NEZ5	A0A0H3NEZ5	19	19	19	tr|A0A0H3NEZ5|A0A0H3NEZ5_SALTS Uncharacterized protein OS=Salmonella typhimurium (strain SL1344) OX=216597 GN=ycaO PE=4 SV=1	1	19	19	19	1	7	13	14	11	12	9	6	5	4	3	1	1	1	1	1	0	0	0	0	0	1	0	1	12	3	1	2	1	0	0	0	0	0	0	0	0	0	0	0
A0A0H3NEZ7	A0A0H3NEZ7	2	2	2	tr|A0A0H3NEZ7|A0A0H3NEZ7_SALTS Hypothetical inner membrane protein OS=Salmonella typhimurium (strain SL1344) OX=216597 GN=SL1344_2745 PE=4 SV=1	1	2	2	2	0	1	1	1	1	1	1	2	2	1	1	1	1	1	1	1	1	1	0	0	0	0	0	0	0	0	0	0	0	0	0	0	0	0	0	0	0	0	0	0
A0A0H3NEZ8	A0A0H3NEZ8	41	15	15	tr|A0A0H3NEZ8|A0A0H3NEZ8_SALTS Flagellin OS=Salmonella typhimurium (strain SL1344) OX=216597 GN=fljB PE=3 SV=1	1	41	15	15	13	12	14	13	14	13	12	12	12	12	12	12	16	14	15	14	13	18	16	13	33	16	8	8	13	6	6	6	6	6	6	5	7	7	9	8	8	8	13	16
A0A0H3NF01	A0A0H3NF01	2	2	2	tr|A0A0H3NF01|A0A0H3NF01_SALTS Hypothetical exported protein OS=Salmonella typhimurium (strain SL1344) OX=216597 GN=iroE PE=4 SV=1	1	2	2	2	2	0	0	0	0	0	0	0	0	0	0	0	0	0	0	0	0	0	0	0	0	0	0	0	0	0	0	0	0	0	0	0	0	0	0	0	0	0	0	0
A0A0H3NF06	A0A0H3NF06	6	6	6	tr|A0A0H3NF06|A0A0H3NF06_SALTS L-2-hydroxyglutarate oxidase LhgO OS=Salmonella typhimurium (strain SL1344) OX=216597 GN=ygaF PE=3 SV=1	1	6	6	6	1	1	1	1	1	1	2	3	5	2	2	1	0	0	0	0	0	0	0	0	0	1	0	1	1	0	0	0	0	1	2	1	1	1	0	0	0	0	0	0
A0A0H3NF07;REV__A0A0H3NAS5	A0A0H3NF07	7;1	7;1	7;1	tr|A0A0H3NF07|A0A0H3NF07_SALTS Phosphofructokinase OS=Salmonella typhimurium (strain SL1344) OX=216597 GN=fruK PE=3 SV=1	2	7	7	7	3	5	5	6	6	1	0	0	0	0	0	0	0	0	0	0	0	0	0	0	0	0	0	1	4	0	0	0	0	0	0	0	0	0	0	0	0	0	0	0
A0A0H3NF10	A0A0H3NF10	7	7	7	tr|A0A0H3NF10|A0A0H3NF10_SALTS Uncharacterized protein OS=Salmonella typhimurium (strain SL1344) OX=216597 GN=ygaU PE=4 SV=1	1	7	7	7	5	4	1	0	0	0	0	0	0	0	0	0	0	0	0	0	0	0	0	0	0	0	0	0	0	0	0	0	0	0	2	2	1	1	1	0	0	0	0	0
A0A0H3NF11	A0A0H3NF11	29	29	29	tr|A0A0H3NF11|A0A0H3NF11_SALTS Hypothetical exported protein OS=Salmonella typhimurium (strain SL1344) OX=216597 GN=SL1344_2770 PE=4 SV=1	1	29	29	29	26	26	24	23	19	16	17	13	9	7	7	5	4	1	1	0	0	1	0	0	3	11	14	16	23	11	10	9	9	8	7	5	4	5	6	4	2	2	2	2
A0A0H3NF12	A0A0H3NF12	1	1	1	tr|A0A0H3NF12|A0A0H3NF12_SALTS Uncharacterized protein OS=Salmonella typhimurium (strain SL1344) OX=216597 GN=SL1344_2187 PE=4 SV=1	1	1	1	1	1	0	0	0	0	0	0	0	0	0	0	0	0	0	0	0	0	0	0	0	0	0	1	0	0	0	0	0	0	0	0	0	0	0	0	0	0	0	0	0
A0A0H3NF14	A0A0H3NF14	18	18	18	tr|A0A0H3NF14|A0A0H3NF14_SALTS 4-aminobutyrate aminotransferase OS=Salmonella typhimurium (strain SL1344) OX=216597 GN=gabT PE=3 SV=1	1	18	18	18	0	1	11	15	13	12	12	6	3	2	1	0	1	0	0	0	0	0	0	0	0	2	0	1	11	11	9	9	6	1	1	0	0	0	0	0	0	0	0	0
A0A0H3NF20	A0A0H3NF20	4	4	4	tr|A0A0H3NF20|A0A0H3NF20_SALTS Uncharacterized protein OS=Salmonella typhimurium (strain SL1344) OX=216597 GN=yejG PE=4 SV=1	1	4	4	4	4	1	0	0	0	0	0	0	0	0	0	0	0	0	0	0	0	0	0	0	0	0	1	1	1	0	0	0	0	0	0	0	0	0	0	0	0	0	0	0
A0A0H3NF21	A0A0H3NF21	1	1	1	tr|A0A0H3NF21|A0A0H3NF21_SALTS Hypothetical transcriptional regulator OS=Salmonella typhimurium (strain SL1344) OX=216597 GN=SL1344_2781 PE=4 SV=1	1	1	1	1	1	1	0	0	0	0	0	0	0	0	0	0	0	0	0	0	0	0	0	0	0	0	0	0	1	0	0	0	0	0	0	0	0	0	0	0	0	0	0	0
A0A0H3NF25	A0A0H3NF25	3	3	3	tr|A0A0H3NF25|A0A0H3NF25_SALTS Uncharacterized protein OS=Salmonella typhimurium (strain SL1344) OX=216597 GN=ygaM PE=4 SV=1	1	3	3	3	0	0	0	0	0	0	0	1	1	0	2	0	2	0	3	2	3	3	2	0	2	0	0	0	0	0	0	0	0	0	0	0	0	0	0	0	0	0	0	2
A0A0H3NF28	A0A0H3NF28	11	11	11	tr|A0A0H3NF28|A0A0H3NF28_SALTS Cytidylate kinase OS=Salmonella typhimurium (strain SL1344) OX=216597 GN=cmk PE=3 SV=1	1	11	11	11	11	10	8	5	5	3	3	1	0	1	1	0	0	0	0	0	0	0	0	0	1	4	8	7	8	1	1	1	0	0	0	0	0	0	0	0	0	0	0	0
A0A0H3NF30	A0A0H3NF30	6	6	6	tr|A0A0H3NF30|A0A0H3NF30_SALTS Multidrug resistance protein A OS=Salmonella typhimurium (strain SL1344) OX=216597 GN=emrA PE=4 SV=1	1	6	6	6	0	0	0	0	0	0	0	0	0	0	0	0	0	0	0	0	0	0	0	0	5	0	0	0	0	0	0	0	0	0	0	0	0	0	0	0	0	0	0	0
A0A0H3NF33	A0A0H3NF33	7	7	7	tr|A0A0H3NF33|A0A0H3NF33_SALTS Glycine betaine-binding periplasmic protein OS=Salmonella typhimurium (strain SL1344) OX=216597 GN=proX PE=4 SV=1	1	7	7	7	3	3	2	1	2	2	1	1	1	1	1	0	0	0	0	0	0	0	0	0	0	0	3	2	1	1	1	0	0	0	0	0	0	0	0	0	0	0	0	0
A0A0H3NF39	A0A0H3NF39	2	2	2	tr|A0A0H3NF39|A0A0H3NF39_SALTS Hypothetical membrane protein OS=Salmonella typhimurium (strain SL1344) OX=216597 GN=ycbC PE=4 SV=1	1	2	2	2	0	0	0	0	0	1	1	1	1	1	1	1	0	0	0	0	0	1	1	0	2	0	0	0	0	0	0	0	0	0	0	0	0	0	0	0	0	0	0	0
A0A0H3NF40	A0A0H3NF40	18	18	18	tr|A0A0H3NF40|A0A0H3NF40_SALTS Protein RecA OS=Salmonella typhimurium (strain SL1344) OX=216597 GN=recA PE=3 SV=1	1	18	18	18	16	16	14	13	12	15	12	13	12	10	13	6	8	5	4	3	1	8	4	5	12	9	11	11	12	10	8	9	8	7	7	6	5	6	6	6	7	5	3	5
A0A0H3NF42	A0A0H3NF42	5	5	5	tr|A0A0H3NF42|A0A0H3NF42_SALTS Translational regulator CsrA OS=Salmonella typhimurium (strain SL1344) OX=216597 GN=csrA PE=3 SV=1	1	5	5	5	5	3	2	3	2	4	2	1	1	1	1	0	1	0	1	1	1	1	1	0	0	1	1	2	4	0	2	1	2	0	1	1	0	0	0	0	0	0	0	0
A0A0H3NF43	A0A0H3NF43	17	17	17	tr|A0A0H3NF43|A0A0H3NF43_SALTS Hypothetical exported protein OS=Salmonella typhimurium (strain SL1344) OX=216597 GN=ycbB PE=4 SV=1	1	17	17	17	11	12	11	5	2	2	1	1	1	0	0	0	0	0	0	0	0	0	0	0	0	1	3	4	8	3	0	0	0	0	0	0	0	0	0	0	0	0	0	0
A0A0H3NJA7;A0A0H3NF44	A0A0H3NJA7;A0A0H3NF44	2;2	2;2	2;2	tr|A0A0H3NJA7|A0A0H3NJA7_SALTS Cytochrome c-type biogenesis protein OS=Salmonella typhimurium (strain SL1344) OX=216597 GN=ccmH1 PE=3 SV=1;tr|A0A0H3NF44|A0A0H3NF44_SALTS Cytochrome c-type biogenesis protein OS=Salmonella typhimurium (strain SL1344) OX=2165	2	2	2	2	0	0	0	0	0	0	0	0	0	0	0	0	0	0	1	1	1	0	0	0	2	0	0	0	0	0	0	0	0	0	0	0	0	0	0	0	0	0	0	0
A0A0H3NF45	A0A0H3NF45	7	7	7	tr|A0A0H3NF45|A0A0H3NF45_SALTS PTS system, glucitol/sorbitol-specific IIA component OS=Salmonella typhimurium (strain SL1344) OX=216597 GN=slrB PE=4 SV=1	1	7	7	7	5	2	1	0	0	0	0	0	0	0	0	0	0	0	0	0	0	0	0	0	0	1	2	2	1	0	0	0	0	0	1	0	0	0	0	0	0	0	0	0
A0A0H3NF48	A0A0H3NF48	37	37	37	tr|A0A0H3NF48|A0A0H3NF48_SALTS Asparagine--tRNA ligase OS=Salmonella typhimurium (strain SL1344) OX=216597 GN=asnCa PE=3 SV=1	1	37	37	37	3	26	36	36	34	31	30	27	17	15	12	4	7	2	0	0	0	0	0	0	1	12	8	16	34	19	17	15	14	12	8	8	7	5	3	2	2	1	1	0
A0A0H3NF49	A0A0H3NF49	2	2	2	tr|A0A0H3NF49|A0A0H3NF49_SALTS Anaerobic nitric oxide reductase transcription regulator NorR OS=Salmonella typhimurium (strain SL1344) OX=216597 GN=norR PE=3 SV=1	1	2	2	2	0	0	1	0	0	0	0	0	0	0	0	0	0	0	0	0	0	0	0	0	0	0	0	0	0	0	0	0	0	0	0	0	0	0	0	0	0	0	0	0
A0A0H3NF50	A0A0H3NF50	1	1	1	tr|A0A0H3NF50|A0A0H3NF50_SALTS Cytochrome c-type protein OS=Salmonella typhimurium (strain SL1344) OX=216597 GN=napC PE=4 SV=1	1	1	1	1	0	0	0	0	0	0	0	0	0	0	0	0	0	0	0	0	0	0	0	0	1	0	0	0	0	0	0	0	0	0	0	0	0	0	0	0	0	0	0	0
A0A0H3NF54	A0A0H3NF54	1	1	1	tr|A0A0H3NF54|A0A0H3NF54_SALTS Chaperone NapD OS=Salmonella typhimurium (strain SL1344) OX=216597 GN=napD PE=3 SV=1	1	1	1	1	1	1	1	1	0	0	0	0	0	0	0	0	0	0	0	0	0	0	0	0	0	1	1	1	0	0	0	0	0	0	0	0	0	0	0	0	0	0	0	0
A0A0H3NF60	A0A0H3NF60	2	2	2	tr|A0A0H3NF60|A0A0H3NF60_SALTS Formate hydrogenlyase subunit 5 OS=Salmonella typhimurium (strain SL1344) OX=216597 GN=hycE PE=4 SV=1	1	2	2	2	0	0	0	0	0	0	1	2	2	1	0	0	0	0	0	0	0	0	0	0	0	0	0	0	0	0	0	0	0	0	0	0	0	0	0	0	0	0	0	0
A0A0H3NF69	A0A0H3NF69	18	18	18	tr|A0A0H3NF69|A0A0H3NF69_SALTS Ubiquinone biosynthesis O-methyltransferase OS=Salmonella typhimurium (strain SL1344) OX=216597 GN=ubiG PE=3 SV=1	1	18	18	18	6	5	4	1	4	7	12	14	13	9	7	6	2	2	2	0	0	0	0	0	0	0	3	1	3	1	2	3	6	8	7	5	4	3	2	2	1	0	0	0
A0A0H3NF73	A0A0H3NF73	2	2	2	tr|A0A0H3NF73|A0A0H3NF73_SALTS Hydrogenase isoenzymes formation protein HypC OS=Salmonella typhimurium (strain SL1344) OX=216597 GN=hypC PE=4 SV=1	1	2	2	2	2	1	0	0	0	0	0	0	0	0	0	0	0	0	0	0	0	0	0	0	0	1	1	1	0	0	0	0	0	0	0	0	0	0	0	0	0	0	0	0
A0A0H3NF75	A0A0H3NF75	2	2	2	tr|A0A0H3NF75|A0A0H3NF75_SALTS Hypothetical transcriptional regulator OS=Salmonella typhimurium (strain SL1344) OX=216597 GN=SL1344_2250 PE=4 SV=1	1	2	2	2	1	2	2	2	2	1	1	0	0	0	0	0	0	0	0	0	0	0	0	0	1	0	0	1	0	0	0	0	0	0	0	0	0	0	0	0	0	0	0	0
A0A0H3NF77	A0A0H3NF77	13	13	13	tr|A0A0H3NF77|A0A0H3NF77_SALTS Type III secretion system effector protein-regulator of Salmonella-induced inflammatory response OS=Salmonella typhimurium (strain SL1344) OX=216597 GN=avrA PE=4 SV=1	1	13	13	13	1	1	1	0	2	3	3	4	6	5	5	3	4	1	2	2	2	2	2	1	6	1	0	0	0	0	0	0	0	1	1	1	1	1	1	1	1	2	2	2
A0A0H3NF80	A0A0H3NF80	31	31	31	tr|A0A0H3NF80|A0A0H3NF80_SALTS Anaerobic glycerol-3-phosphate dehydrogenase subunit C OS=Salmonella typhimurium (strain SL1344) OX=216597 GN=glpC PE=4 SV=1	1	31	31	31	20	26	26	23	22	14	17	16	16	11	11	4	8	4	7	4	7	7	4	0	10	3	6	8	26	9	8	7	6	5	3	1	2	3	3	2	1	2	2	4
A0A0H3NF82	A0A0H3NF82	7	7	7	tr|A0A0H3NF82|A0A0H3NF82_SALTS Type III secretion system apparatus OS=Salmonella typhimurium (strain SL1344) OX=216597 GN=prgI PE=4 SV=1	1	7	7	7	6	5	2	4	6	6	6	6	6	6	6	4	5	4	6	4	5	5	5	2	5	3	2	2	1	0	3	4	5	5	3	3	3	2	2	2	2	2	2	5
A0A0H3NF83	A0A0H3NF83	3	3	3	tr|A0A0H3NF83|A0A0H3NF83_SALTS Uncharacterized protein OS=Salmonella typhimurium (strain SL1344) OX=216597 GN=orgC PE=4 SV=1	1	3	3	3	3	1	1	1	1	0	0	0	0	0	0	0	0	0	0	0	0	0	0	0	0	0	1	0	1	0	0	0	0	0	0	0	0	0	0	0	0	0	0	0
A0A0H3NF85	A0A0H3NF85	13	13	13	tr|A0A0H3NF85|A0A0H3NF85_SALTS L-rhamnonate dehydratase OS=Salmonella typhimurium (strain SL1344) OX=216597 GN=yfaW PE=3 SV=1	1	13	13	13	0	0	1	5	12	9	9	6	5	4	2	0	0	0	0	0	0	1	0	0	0	0	0	0	0	1	2	2	2	1	1	1	1	0	0	0	0	0	0	0
A0A0H3NF87	A0A0H3NF87	33	33	33	tr|A0A0H3NF87|A0A0H3NF87_SALTS Pathogenicity island 1 Type III secretion system effector protein OS=Salmonella typhimurium (strain SL1344) OX=216597 GN=sipB PE=4 SV=1	1	33	33	33	10	15	18	19	20	22	23	23	24	21	21	12	19	14	16	13	11	22	18	8	27	6	2	2	18	4	6	7	8	9	9	8	7	10	10	9	9	11	10	21
A0A0H3NF89	A0A0H3NF89	25	25	25	tr|A0A0H3NF89|A0A0H3NF89_SALTS Invasion protein regulator OS=Salmonella typhimurium (strain SL1344) OX=216597 GN=hilA PE=4 SV=1	1	25	25	25	17	17	15	15	14	11	12	9	11	11	10	3	11	4	4	0	5	10	6	2	12	2	1	2	9	5	4	4	3	3	5	3	4	3	2	2	4	2	2	7
A0A0H3NF90	A0A0H3NF90	8	8	8	tr|A0A0H3NF90|A0A0H3NF90_SALTS Lipopolysaccharide core heptose(II)-phosphate phosphatase OS=Salmonella typhimurium (strain SL1344) OX=216597 GN=ais PE=3 SV=1	1	8	8	8	8	7	2	0	0	0	0	0	0	0	0	0	0	0	0	0	0	0	0	0	0	0	4	4	3	0	0	0	0	0	0	0	0	0	0	0	0	0	0	0
A0A0H3NF91	A0A0H3NF91	6	6	6	tr|A0A0H3NF91|A0A0H3NF91_SALTS Superoxide dismutase [Cu-Zn] OS=Salmonella typhimurium (strain SL1344) OX=216597 GN=sodCa PE=3 SV=1	1	6	6	6	6	6	6	6	6	5	6	6	4	2	2	1	2	0	0	0	0	0	0	0	1	2	2	3	5	1	1	1	1	1	1	1	1	1	1	1	1	0	0	0
A0A0H3NF93	A0A0H3NF93	1	1	1	tr|A0A0H3NF93|A0A0H3NF93_SALTS Type III secretion system secretory apparatus OS=Salmonella typhimurium (strain SL1344) OX=216597 GN=spaP PE=3 SV=1	1	1	1	1	0	0	0	0	0	0	0	0	0	0	0	0	0	0	0	0	0	0	0	0	0	0	0	0	0	0	0	0	0	0	0	0	0	1	1	1	0	0	0	0
A0A0H3NF95	A0A0H3NF95	3	3	3	tr|A0A0H3NF95|A0A0H3NF95_SALTS Type III secretion system secretory apparatus OS=Salmonella typhimurium (strain SL1344) OX=216597 GN=spaS PE=4 SV=1	1	3	3	3	1	0	0	0	0	1	0	0	0	0	0	0	0	0	0	0	0	0	0	0	0	0	0	0	1	0	0	0	0	0	0	0	0	0	0	0	0	0	0	0
A0A0H3NF97	A0A0H3NF97	20	20	20	tr|A0A0H3NF97|A0A0H3NF97_SALTS Surface presentation of antigens protein (Associated with type III secretion and virulence) OS=Salmonella typhimurium (strain SL1344) OX=216597 GN=invJ PE=4 SV=1	1	20	20	20	20	19	18	15	11	7	8	2	2	1	1	1	1	1	0	0	0	0	0	0	0	4	7	7	15	3	2	2	1	1	1	0	0	0	0	0	0	0	0	0
A0A0H3NF98	A0A0H3NF98	9	9	9	tr|A0A0H3NF98|A0A0H3NF98_SALTS o-succinylbenzoate synthase OS=Salmonella typhimurium (strain SL1344) OX=216597 GN=menC PE=3 SV=1	1	9	9	9	8	6	7	3	2	0	1	0	0	0	0	0	0	0	0	0	0	0	0	0	0	3	3	4	1	0	0	0	0	0	0	0	0	0	0	0	0	0	0	0
A0A0H3NF99	A0A0H3NF99	6	6	6	tr|A0A0H3NF99|A0A0H3NF99_SALTS Chaperone protein for type III secretion system effectors OS=Salmonella typhimurium (strain SL1344) OX=216597 GN=invB PE=4 SV=1	1	6	6	6	4	4	4	4	4	4	4	4	4	4	4	2	3	3	2	3	2	1	2	2	5	4	2	4	5	4	2	2	3	2	2	2	2	2	2	1	1	1	1	2
A0A0H3NFA1	A0A0H3NFA1	5	5	5	tr|A0A0H3NFA1|A0A0H3NFA1_SALTS Uncharacterized protein OS=Salmonella typhimurium (strain SL1344) OX=216597 GN=elaB PE=4 SV=1	1	5	5	5	0	0	0	0	0	0	0	0	1	1	1	0	2	0	1	0	1	5	4	1	4	0	0	0	0	0	0	0	0	0	0	0	0	0	0	0	0	0	0	4
A0A0H3NFA2	A0A0H3NFA2	9	9	9	tr|A0A0H3NFA2|A0A0H3NFA2_SALTS Cell invasion protein OS=Salmonella typhimurium (strain SL1344) OX=216597 GN=invE PE=4 SV=1	1	9	9	9	1	1	0	0	1	2	1	0	3	1	2	3	3	2	3	3	3	1	0	0	5	2	0	0	0	0	0	0	0	0	0	0	0	0	0	0	0	0	0	1
A0A0H3NFA4	A0A0H3NFA4	30	30	30	tr|A0A0H3NFA4|A0A0H3NFA4_SALTS Ribosomal RNA large subunit methyltransferase K/L OS=Salmonella typhimurium (strain SL1344) OX=216597 GN=rlmL PE=3 SV=1	1	30	30	30	10	19	15	10	10	4	4	1	1	1	0	1	0	1	1	1	1	0	0	0	2	5	3	7	18	6	4	3	1	1	1	0	0	0	0	0	0	0	0	0
A0A0H3NFA6	A0A0H3NFA6	2	2	2	tr|A0A0H3NFA6|A0A0H3NFA6_SALTS Salmonella pathogenicity island 1 protein OS=Salmonella typhimurium (strain SL1344) OX=216597 GN=SL1344_2885 PE=4 SV=1	1	2	2	2	1	1	2	1	1	1	1	0	0	0	0	0	0	0	0	0	0	0	0	0	0	0	0	0	1	0	0	0	0	0	0	0	0	0	0	0	0	0	0	0
A0A0H3NFA7	A0A0H3NFA7	3	3	3	tr|A0A0H3NFA7|A0A0H3NFA7_SALTS Ribosome modulation factor OS=Salmonella typhimurium (strain SL1344) OX=216597 GN=rmf PE=2 SV=1	1	3	3	3	0	0	2	3	2	3	3	3	3	2	2	1	2	0	0	0	0	0	0	0	0	0	0	0	1	0	0	0	0	0	0	0	0	0	0	0	0	0	0	0
A0A0H3NFA9	A0A0H3NFA9	15	15	15	tr|A0A0H3NFA9|A0A0H3NFA9_SALTS NADH-quinone oxidoreductase subunit I OS=Salmonella typhimurium (strain SL1344) OX=216597 GN=nuoI PE=3 SV=1	1	15	15	15	3	3	4	8	9	7	7	10	10	8	8	1	5	1	5	1	2	4	3	1	11	1	0	0	1	0	0	1	1	1	1	1	1	0	1	1	1	1	1	2
A0A0H3NFB3	A0A0H3NFB3	28	28	28	tr|A0A0H3NFB3|A0A0H3NFB3_SALTS NADH-quinone oxidoreductase subunit C/D OS=Salmonella typhimurium (strain SL1344) OX=216597 GN=nuoC PE=3 SV=1	1	28	28	28	1	7	10	14	14	13	14	11	13	11	10	4	6	2	3	2	1	4	2	0	20	3	0	3	10	5	5	3	4	4	2	1	1	0	0	0	0	0	0	2
A0A0H3NFB5	A0A0H3NFB5	4	4	4	tr|A0A0H3NFB5|A0A0H3NFB5_SALTS Methylglyoxal synthase OS=Salmonella typhimurium (strain SL1344) OX=216597 GN=mgsA PE=3 SV=1	1	4	4	4	4	4	4	4	4	4	3	2	1	1	0	0	1	0	0	0	0	0	0	0	0	1	1	2	4	1	1	1	1	1	0	0	0	0	0	0	0	0	0	0
A0A0H3NFB7	A0A0H3NFB7	4	4	4	tr|A0A0H3NFB7|A0A0H3NFB7_SALTS Possible sugar aldolase OS=Salmonella typhimurium (strain SL1344) OX=216597 GN=ygbL PE=4 SV=1	1	4	4	4	0	1	2	0	0	0	1	0	0	0	0	0	0	0	0	0	0	0	0	0	0	0	0	0	3	0	0	0	0	0	0	0	0	0	0	0	0	0	0	0
A0A0H3NFC0	A0A0H3NFC0	24	24	24	tr|A0A0H3NFC0|A0A0H3NFC0_SALTS Hypothetical aminotransferase OS=Salmonella typhimurium (strain SL1344) OX=216597 GN=yfbQ PE=4 SV=1	1	24	24	24	7	12	9	3	3	2	17	21	19	14	13	1	4	1	1	1	1	1	0	0	7	4	2	5	8	3	2	3	8	8	9	5	4	4	2	1	0	0	0	0
A0A0H3NFC3	A0A0H3NFC3	5	5	5	tr|A0A0H3NFC3|A0A0H3NFC3_SALTS Uncharacterized protein OS=Salmonella typhimurium (strain SL1344) OX=216597 GN=ygbJ PE=4 SV=1	1	5	5	5	2	4	2	2	1	0	0	0	0	0	0	0	0	0	0	0	0	0	0	0	0	0	0	0	1	0	0	0	0	0	0	0	0	0	0	0	0	0	0	0
A0A0H3NFC7	A0A0H3NFC7	4	4	4	tr|A0A0H3NFC7|A0A0H3NFC7_SALTS Uncharacterized protein OS=Salmonella typhimurium (strain SL1344) OX=216597 GN=orfX PE=4 SV=1	1	4	4	4	0	0	0	2	3	3	3	3	3	3	3	0	1	0	0	0	0	0	0	0	0	0	0	0	0	0	0	1	1	0	0	0	0	0	0	0	0	0	0	0
A0A0H3NFC8	A0A0H3NFC8	9	9	9	tr|A0A0H3NFC8|A0A0H3NFC8_SALTS Protein-L-isoaspartate O-methyltransferase OS=Salmonella typhimurium (strain SL1344) OX=216597 GN=pcm PE=3 SV=1	1	9	9	9	9	7	5	1	0	1	0	0	0	0	0	0	0	0	0	0	0	0	0	0	0	0	4	2	2	0	0	0	0	0	0	0	0	0	0	0	0	0	0	0
A0A0H3NFC9	A0A0H3NFC9	23	23	23	tr|A0A0H3NFC9|A0A0H3NFC9_SALTS Hypothetical transketolase N-terminal section OS=Salmonella typhimurium (strain SL1344) OX=216597 GN=SL1344_2310 PE=4 SV=1	1	23	23	23	12	17	16	18	17	14	10	8	7	5	4	0	0	0	0	0	0	0	0	0	3	8	7	9	22	12	11	9	8	5	4	2	1	0	0	0	0	0	0	0
A0A0H3NFD2	A0A0H3NFD2	2	2	2	tr|A0A0H3NFD2|A0A0H3NFD2_SALTS 5-hydroxyisourate hydrolase OS=Salmonella typhimurium (strain SL1344) OX=216597 GN=SL1344_1036 PE=3 SV=1	1	2	2	2	1	0	0	0	0	0	0	0	0	0	0	0	0	0	0	0	0	0	0	0	0	0	1	0	0	0	0	0	1	0	0	0	0	0	0	0	0	0	0	0
A0A0H3NFD4	A0A0H3NFD4	12	12	12	tr|A0A0H3NFD4|A0A0H3NFD4_SALTS Uncharacterized protein OS=Salmonella typhimurium (strain SL1344) OX=216597 GN=SL1344_2315 PE=4 SV=1	1	12	12	12	11	10	6	3	3	1	2	2	2	1	1	0	0	0	0	0	0	0	0	0	0	2	5	5	8	3	3	2	4	2	2	1	0	0	0	0	0	0	0	0
A0A0H3NFD5	A0A0H3NFD5	2	2	2	tr|A0A0H3NFD5|A0A0H3NFD5_SALTS Cell division protein FtsB OS=Salmonella typhimurium (strain SL1344) OX=216597 GN=ftsB PE=3 SV=1	1	2	2	2	0	0	0	0	0	0	0	0	0	0	0	0	0	0	0	0	0	0	0	0	1	0	0	0	0	0	0	0	0	0	0	0	0	0	0	1	1	1	1	0
A0A0H3NFD6	A0A0H3NFD6	17	17	17	tr|A0A0H3NFD6|A0A0H3NFD6_SALTS tRNA pseudouridine synthase D OS=Salmonella typhimurium (strain SL1344) OX=216597 GN=truD PE=3 SV=1	1	17	17	17	14	15	13	12	5	3	2	0	0	0	0	0	0	0	0	0	0	0	0	0	0	3	4	2	5	2	1	1	0	0	0	0	0	0	0	0	0	0	0	0
A0A0H3NFD8	A0A0H3NFD8	10	10	10	tr|A0A0H3NFD8|A0A0H3NFD8_SALTS 5-carboxymethyl-2-hydroxymuconate semialdehyde dehydrogenase (Ec 1.2.1.-) (Chms dehydrogenase) OS=Salmonella typhimurium (strain SL1344) OX=216597 GN=hpaE PE=3 SV=1	1	10	10	10	0	0	5	7	8	6	6	6	3	2	0	0	0	0	0	0	0	0	0	0	0	0	0	0	3	2	2	2	2	2	1	1	0	0	0	0	0	0	0	0
A0A0H3NFD9	A0A0H3NFD9	4	4	4	tr|A0A0H3NFD9|A0A0H3NFD9_SALTS Histidine transport ATP-binding protein OS=Salmonella typhimurium (strain SL1344) OX=216597 GN=hisP PE=4 SV=1	1	4	4	4	3	2	1	0	0	0	0	0	0	0	0	0	0	0	0	0	0	0	0	0	1	0	0	0	0	0	0	0	0	0	0	0	0	0	0	0	0	0	0	0
A0A0H3NFE2	A0A0H3NFE2	6	6	6	tr|A0A0H3NFE2|A0A0H3NFE2_SALTS Adenylyl-sulfate kinase OS=Salmonella typhimurium (strain SL1344) OX=216597 GN=cysC PE=3 SV=1	1	6	6	6	3	2	1	0	0	0	1	1	1	1	1	1	1	1	0	0	0	0	0	1	1	0	0	0	0	0	0	0	0	0	0	0	1	1	1	1	1	0	0	0
A0A0H3NFE3	A0A0H3NFE3	5	5	5	tr|A0A0H3NFE3|A0A0H3NFE3_SALTS Alkaline phosphatase isozyme conversion protein OS=Salmonella typhimurium (strain SL1344) OX=216597 GN=iap PE=4 SV=1	1	5	5	5	4	4	1	0	0	0	0	0	0	0	0	0	0	0	0	0	0	0	0	0	0	0	0	0	2	0	0	0	0	0	0	0	0	0	0	0	0	0	0	0
A0A0H3NFE4	A0A0H3NFE4	6	6	6	tr|A0A0H3NFE4|A0A0H3NFE4_SALTS Flavin prenyltransferase UbiX OS=Salmonella typhimurium (strain SL1344) OX=216597 GN=ubiX PE=3 SV=1	1	6	6	6	0	0	1	3	2	0	0	0	0	0	0	0	0	0	0	0	0	0	0	0	0	0	0	0	3	2	1	1	0	0	0	0	0	0	0	0	0	0	0	0
A0A0H3NFE6	A0A0H3NFE6	15	15	15	tr|A0A0H3NFE6|A0A0H3NFE6_SALTS Curved DNA-binding protein OS=Salmonella typhimurium (strain SL1344) OX=216597 GN=cbpA PE=3 SV=1	1	15	15	15	7	14	13	12	9	4	4	3	1	0	0	0	0	0	0	0	0	0	0	0	0	0	0	2	10	1	1	0	0	0	0	0	0	0	0	0	0	0	0	0
A0A0H3NFE7	A0A0H3NFE7	14	14	14	tr|A0A0H3NFE7|A0A0H3NFE7_SALTS Uncharacterized protein OS=Salmonella typhimurium (strain SL1344) OX=216597 GN=yghJ PE=4 SV=1	1	14	14	14	0	0	1	9	11	12	11	7	4	1	1	0	0	0	0	0	0	0	0	0	0	1	0	0	0	2	2	2	3	3	2	0	0	0	0	0	0	0	0	0
A0A0H3NFE8	A0A0H3NFE8	5	5	5	tr|A0A0H3NFE8|A0A0H3NFE8_SALTS Hypothetical transcriptional regulator OS=Salmonella typhimurium (strain SL1344) OX=216597 GN=SL1344_2330 PE=4 SV=1	1	5	5	5	0	2	4	2	2	2	1	0	0	0	0	0	0	0	0	0	0	0	0	0	0	0	0	0	2	0	0	0	0	0	0	0	0	0	0	0	0	0	0	0
A0A0H3NFF1	A0A0H3NFF1	26	26	26	tr|A0A0H3NFF1|A0A0H3NFF1_SALTS Glucose-1-phosphatase (G1Pase), secreted OS=Salmonella typhimurium (strain SL1344) OX=216597 GN=agp PE=4 SV=1	1	26	26	26	21	22	23	23	22	19	20	17	14	12	11	0	4	0	1	1	1	0	0	0	1	5	9	10	21	9	9	8	5	3	2	3	0	0	0	0	0	0	0	0
A0A0H3NFF3	A0A0H3NFF3	10	10	10	tr|A0A0H3NFF3|A0A0H3NFF3_SALTS Phosphoadenosine phosphosulfate reductase OS=Salmonella typhimurium (strain SL1344) OX=216597 GN=cysH PE=3 SV=1	1	10	10	10	9	9	6	4	4	3	5	7	7	2	0	0	0	0	0	0	0	0	0	0	0	0	2	1	3	0	0	0	0	0	0	0	0	0	0	0	0	0	0	0
A0A0H3NFF4	A0A0H3NFF4	15	15	15	tr|A0A0H3NFF4|A0A0H3NFF4_SALTS Acetyl-coenzyme A carboxylase carboxyl transferase subunit beta OS=Salmonella typhimurium (strain SL1344) OX=216597 GN=accD PE=3 SV=1	1	15	15	15	7	11	14	14	13	11	11	7	7	6	5	2	4	2	0	0	0	1	1	1	6	3	2	2	14	3	3	3	3	2	2	1	1	1	2	1	1	1	1	1
A0A0H3NFF6	A0A0H3NFF6	9	9	9	tr|A0A0H3NFF6|A0A0H3NFF6_SALTS Hypothetical secreted protein OS=Salmonella typhimurium (strain SL1344) OX=216597 GN=SL1344_1061 PE=4 SV=1	1	9	9	9	9	9	7	7	6	5	5	3	1	1	1	0	0	0	0	0	0	0	0	0	0	1	3	3	7	1	1	1	0	0	0	0	0	0	0	0	0	0	0	0
A0A0H3NFF8	A0A0H3NFF8	14	14	14	tr|A0A0H3NFF8|A0A0H3NFF8_SALTS 7-carboxy-7-deazaguanine synthase OS=Salmonella typhimurium (strain SL1344) OX=216597 GN=ygcF PE=3 SV=1	1	14	14	14	12	10	8	4	1	0	1	0	0	0	0	0	0	0	0	0	0	0	0	0	0	2	4	4	7	2	1	1	1	2	1	1	1	0	0	0	0	0	0	0
A0A0H3NFG1	A0A0H3NFG1	34	34	34	tr|A0A0H3NFG1|A0A0H3NFG1_SALTS Sulfite reductase [NADPH] flavoprotein alpha-component OS=Salmonella typhimurium (strain SL1344) OX=216597 GN=cysJ PE=3 SV=1	1	34	34	34	0	1	6	11	18	27	28	28	24	21	20	9	9	2	1	0	0	0	0	0	0	5	1	0	1	4	9	16	21	17	15	11	10	6	4	3	1	0	0	0
A0A0H3NFG5	A0A0H3NFG5	18	18	18	tr|A0A0H3NFG5|A0A0H3NFG5_SALTS Hypothetical oxidoreductase OS=Salmonella typhimurium (strain SL1344) OX=216597 GN=SL1344_1071 PE=4 SV=1	1	18	18	18	8	15	12	11	10	9	6	4	4	5	4	1	3	1	1	1	0	0	0	0	0	3	2	6	15	7	5	3	2	2	2	2	0	0	0	0	0	0	0	0
A0A0H3NFG7	A0A0H3NFG7	40	40	40	tr|A0A0H3NFG7|A0A0H3NFG7_SALTS CTP synthase OS=Salmonella typhimurium (strain SL1344) OX=216597 GN=pyrG PE=3 SV=1	1	40	40	40	21	25	32	30	28	23	20	16	13	11	10	3	7	2	3	0	0	2	0	0	5	9	7	14	32	17	15	13	11	7	6	4	4	2	2	1	0	0	0	2
A0A0H3NFH1	A0A0H3NFH1	4	4	4	tr|A0A0H3NFH1|A0A0H3NFH1_SALTS Uncharacterized protein OS=Salmonella typhimurium (strain SL1344) OX=216597 GN=SL1344_2940 PE=3 SV=1	1	4	4	4	3	4	2	2	1	0	0	0	0	0	0	0	0	0	0	0	0	0	0	0	0	0	0	0	2	0	0	0	0	0	0	0	0	0	0	0	0	0	0	0
A0A0H3NFH2	A0A0H3NFH2	7	7	7	tr|A0A0H3NFH2|A0A0H3NFH2_SALTS Uncharacterized protein OS=Salmonella typhimurium (strain SL1344) OX=216597 GN=yfcM PE=4 SV=1	1	7	7	7	5	5	2	0	0	0	0	0	0	0	0	0	0	0	0	0	0	0	0	0	0	0	3	2	1	0	0	0	0	0	0	0	0	0	0	0	0	0	0	0
A0A0H3NFH5	A0A0H3NFH5	30	30	30	tr|A0A0H3NFH5|A0A0H3NFH5_SALTS GTP pyrophosphokinase OS=Salmonella typhimurium (strain SL1344) OX=216597 GN=relA PE=3 SV=1	1	30	30	30	18	23	25	23	24	19	17	12	8	5	5	1	0	0	0	0	0	1	0	0	11	3	7	7	18	7	5	3	3	1	2	1	1	1	1	0	0	0	0	0
A0A0H3NFH6	A0A0H3NFH6	4	4	4	tr|A0A0H3NFH6|A0A0H3NFH6_SALTS Hypothetical RNA pseudouridylate synthase OS=Salmonella typhimurium (strain SL1344) OX=216597 GN=yqcB PE=4 SV=1	1	4	4	4	3	4	4	2	2	0	1	0	0	0	0	0	0	0	0	0	0	0	0	0	0	0	0	0	0	0	0	0	0	0	0	0	0	0	0	0	0	0	0	0
A0A0H3NFH7	A0A0H3NFH7	3	3	3	tr|A0A0H3NFH7|A0A0H3NFH7_SALTS UPF0115 protein YfcN OS=Salmonella typhimurium (strain SL1344) OX=216597 GN=yfcN PE=3 SV=1	1	3	3	3	1	0	0	0	0	1	1	1	2	2	2	1	3	1	1	0	1	0	0	0	1	0	0	0	0	0	0	0	0	1	1	1	1	1	0	0	0	0	0	0
A0A0H3NFI1	A0A0H3NFI1	17	15	15	tr|A0A0H3NFI1|A0A0H3NFI1_SALTS Probable glucarate dehydratase OS=Salmonella typhimurium (strain SL1344) OX=216597 GN=ygcY PE=3 SV=1	1	17	15	15	0	0	10	13	14	14	10	10	7	4	3	0	1	0	0	0	0	0	0	0	0	2	0	0	10	3	4	4	4	1	1	0	0	0	0	0	0	0	0	0
A0A0H3NFI2	A0A0H3NFI2	4	4	4	tr|A0A0H3NFI2|A0A0H3NFI2_SALTS Long-chain fatty acid transport protein OS=Salmonella typhimurium (strain SL1344) OX=216597 GN=fadL PE=4 SV=1	1	4	4	4	0	0	0	0	0	0	0	0	0	0	0	0	0	0	0	0	0	0	0	0	3	0	0	0	0	0	0	0	0	0	0	0	0	0	0	0	0	0	1	0
A0A0H3NFI4	A0A0H3NFI4	2	2	2	tr|A0A0H3NFI4|A0A0H3NFI4_SALTS Serine transporter OS=Salmonella typhimurium (strain SL1344) OX=216597 GN=sdaC PE=4 SV=1	1	2	2	2	0	0	0	0	0	0	0	0	1	0	1	0	1	0	1	1	1	1	0	0	2	0	0	0	0	0	0	0	0	0	0	0	0	0	0	0	0	0	0	0
A0A0H3NFI8	A0A0H3NFI8	7	7	7	tr|A0A0H3NFI8|A0A0H3NFI8_SALTS Protein Syd OS=Salmonella typhimurium (strain SL1344) OX=216597 GN=syd PE=3 SV=1	1	7	7	7	7	6	3	1	0	0	0	0	0	0	0	0	0	0	0	0	0	0	0	0	0	0	3	3	1	1	0	0	0	0	0	0	0	0	0	0	0	0	0	0
A0A0H3NFJ1	A0A0H3NFJ1	17	17	17	tr|A0A0H3NFJ1|A0A0H3NFJ1_SALTS Hypothetical aminotransferase OS=Salmonella typhimurium (strain SL1344) OX=216597 GN=yfdZ PE=4 SV=1	1	17	17	17	7	9	9	10	7	5	1	1	2	0	0	0	0	0	0	0	0	0	0	0	0	2	4	6	10	5	4	3	1	0	0	0	0	0	0	0	0	0	0	0
A0A0H3NFJ2	A0A0H3NFJ2	3	3	3	tr|A0A0H3NFJ2|A0A0H3NFJ2_SALTS Uncharacterized protein OS=Salmonella typhimurium (strain SL1344) OX=216597 GN=yceB PE=4 SV=1	1	3	3	3	0	0	0	0	0	0	0	0	0	0	0	0	0	0	1	1	1	1	1	1	3	0	0	0	0	0	0	0	0	0	0	0	0	0	0	0	0	0	0	0
A0A0H3NFJ3	A0A0H3NFJ3	6	6	6	tr|A0A0H3NFJ3|A0A0H3NFJ3_SALTS Flap endonuclease Xni OS=Salmonella typhimurium (strain SL1344) OX=216597 GN=exo PE=3 SV=1	1	6	6	6	5	5	4	4	4	4	2	1	0	0	0	0	0	0	0	0	0	0	0	0	0	1	1	1	1	1	2	2	2	1	1	0	0	0	0	0	0	0	0	0
A0A0H3NFJ4	A0A0H3NFJ4	18	18	18	tr|A0A0H3NFJ4|A0A0H3NFJ4_SALTS Ribosomal RNA large subunit methyltransferase M OS=Salmonella typhimurium (strain SL1344) OX=216597 GN=ygdE PE=3 SV=1	1	18	18	18	12	12	9	7	4	2	2	2	1	0	0	0	0	0	0	0	0	0	0	0	0	1	6	5	4	4	2	2	1	0	0	0	0	0	0	0	0	0	0	0
A0A0H3NFJ8	A0A0H3NFJ8	12	12	12	tr|A0A0H3NFJ8|A0A0H3NFJ8_SALTS Hypothetical virulence factor MviM OS=Salmonella typhimurium (strain SL1344) OX=216597 GN=mviM PE=4 SV=1	1	12	12	12	0	5	9	9	7	3	3	2	1	0	0	0	0	0	0	0	0	0	0	0	0	0	0	0	11	2	1	0	0	0	0	0	0	0	0	0	0	0	0	0
A0A0H3NFJ9	A0A0H3NFJ9	5	5	5	tr|A0A0H3NFJ9|A0A0H3NFJ9_SALTS L-fuculokinase OS=Salmonella typhimurium (strain SL1344) OX=216597 GN=fucK PE=3 SV=1	1	5	5	5	0	5	3	2	0	0	0	0	1	1	1	1	1	1	1	1	1	1	1	1	0	0	0	0	2	0	0	0	0	0	0	0	0	0	0	0	0	0	0	0
A0A0H3NFK0	A0A0H3NFK0	9	9	9	tr|A0A0H3NFK0|A0A0H3NFK0_SALTS Uncharacterized protein OS=Salmonella typhimurium (strain SL1344) OX=216597 GN=ygdK PE=4 SV=1	1	9	9	9	6	7	3	3	2	2	2	2	0	1	0	0	0	0	0	0	0	0	0	0	1	1	2	2	2	1	0	0	0	0	0	0	0	0	0	0	0	0	0	0
A0A0H3NFK3	A0A0H3NFK3	4	4	4	tr|A0A0H3NFK3|A0A0H3NFK3_SALTS Uncharacterized protein OS=Salmonella typhimurium (strain SL1344) OX=216597 GN=yfeD PE=4 SV=1	1	4	4	4	0	0	0	0	2	2	3	2	1	1	1	0	0	0	0	0	0	0	0	0	0	1	0	0	0	0	0	0	0	0	0	0	0	0	0	0	0	0	0	0
A0A0H3NFK5	A0A0H3NFK5	2	2	2	tr|A0A0H3NFK5|A0A0H3NFK5_SALTS Amino-acid acetyltransferase OS=Salmonella typhimurium (strain SL1344) OX=216597 GN=argA PE=3 SV=1	1	2	2	2	1	0	0	0	0	0	0	0	0	0	0	0	0	0	0	0	0	0	0	0	0	1	0	0	0	0	0	0	0	0	0	0	0	0	0	0	0	0	0	0
A0A0H3NFK8	A0A0H3NFK8	10	10	10	tr|A0A0H3NFK8|A0A0H3NFK8_SALTS Flagellar basal-body rod protein FlgG OS=Salmonella typhimurium (strain SL1344) OX=216597 GN=flgG PE=3 SV=1	1	10	10	10	4	2	2	2	1	1	3	3	3	3	3	2	2	1	0	0	0	1	3	3	7	0	1	0	1	0	0	0	0	1	1	1	1	1	1	1	1	1	1	1
A0A0H3NFK9	A0A0H3NFK9	9	9	9	tr|A0A0H3NFK9|A0A0H3NFK9_SALTS Uncharacterized protein OS=Salmonella typhimurium (strain SL1344) OX=216597 GN=ygdL PE=4 SV=1	1	9	9	9	1	3	5	4	3	3	2	1	1	1	0	0	0	0	0	0	0	0	0	0	0	0	1	1	3	0	0	0	0	0	0	0	0	0	0	0	0	0	0	0
A0A0H3NFL1	A0A0H3NFL1	14	14	14	tr|A0A0H3NFL1|A0A0H3NFL1_SALTS Flagellar hook-associated protein 3 OS=Salmonella typhimurium (strain SL1344) OX=216597 GN=flgL PE=4 SV=1	1	14	14	14	6	5	4	3	4	2	0	0	0	1	0	1	0	1	1	1	0	4	2	2	13	1	0	1	1	0	0	0	0	0	0	0	0	0	0	0	0	1	1	2
A0A0H3NFL2	A0A0H3NFL2	39	39	39	tr|A0A0H3NFL2|A0A0H3NFL2_SALTS DNA ligase OS=Salmonella typhimurium (strain SL1344) OX=216597 GN=lig PE=3 SV=1	1	39	39	39	12	18	15	13	20	22	23	25	26	22	17	3	4	0	0	0	0	0	0	0	0	3	3	2	18	4	6	12	11	12	11	9	7	6	3	2	2	0	0	0
A0A0H3NFL3	A0A0H3NFL3	30	30	29	tr|A0A0H3NFL3|A0A0H3NFL3_SALTS RecBCD enzyme subunit RecB OS=Salmonella typhimurium (strain SL1344) OX=216597 GN=recB PE=3 SV=1	1	30	30	29	1	0	0	7	12	15	17	11	7	3	3	1	0	0	0	0	0	0	0	0	0	2	0	1	0	0	2	6	5	3	1	1	0	0	0	0	0	0	0	0
A0A0H3NFL5	A0A0H3NFL5	8	8	8	tr|A0A0H3NFL5|A0A0H3NFL5_SALTS Maf-like protein YceF OS=Salmonella typhimurium (strain SL1344) OX=216597 GN=maf-a PE=3 SV=1	1	8	8	8	7	6	5	2	2	2	2	1	1	1	1	0	0	0	0	0	0	0	0	0	0	3	2	4	4	3	3	2	2	1	1	1	1	1	0	1	0	0	0	0
A0A0H3NFL6	A0A0H3NFL6	44	44	43	tr|A0A0H3NFL6|A0A0H3NFL6_SALTS Phosphoenolpyruvate-protein phosphotransferase OS=Salmonella typhimurium (strain SL1344) OX=216597 GN=ptsI PE=3 SV=1	1	44	44	43	30	36	38	38	37	35	31	30	22	16	16	5	8	1	3	2	0	2	0	0	3	11	10	14	34	20	18	15	14	10	6	7	4	3	4	2	3	2	1	2
A0A0H3NFL8	A0A0H3NFL8	20	20	20	tr|A0A0H3NFL8|A0A0H3NFL8_SALTS Malonyl CoA-acyl carrier protein transacylase OS=Salmonella typhimurium (strain SL1344) OX=216597 GN=fabD PE=3 SV=1	1	20	20	20	18	18	16	10	8	8	8	6	5	6	3	2	2	1	1	1	0	0	0	0	0	4	10	10	18	8	6	6	5	5	4	3	3	3	3	3	3	1	2	0
A0A0H3NFL9	A0A0H3NFL9	8	8	8	tr|A0A0H3NFL9|A0A0H3NFL9_SALTS Hypothetical amidotransferase OS=Salmonella typhimurium (strain SL1344) OX=216597 GN=yfeJ PE=4 SV=1	1	8	8	8	6	6	4	2	1	0	0	0	0	0	0	0	0	0	0	0	0	0	0	0	0	0	1	1	4	0	0	0	0	0	0	0	0	0	0	0	0	0	0	0
A0A0H3NFM9	A0A0H3NFM9	25	25	25	tr|A0A0H3NFM9|A0A0H3NFM9_SALTS Beta-hexosaminidase OS=Salmonella typhimurium (strain SL1344) OX=216597 GN=nagZ PE=3 SV=1	1	25	25	25	8	8	4	6	8	10	17	21	21	16	12	4	5	0	0	0	0	0	0	0	0	3	2	2	3	1	2	4	5	6	6	4	4	3	2	2	0	0	0	0
A0A0H3NFN5	A0A0H3NFN5	5	5	5	tr|A0A0H3NFN5|A0A0H3NFN5_SALTS Ethanolamine ammonia-lyase light chain OS=Salmonella typhimurium (strain SL1344) OX=216597 GN=eutC PE=3 SV=1	1	5	5	5	0	0	0	0	1	3	2	1	0	0	0	0	0	0	0	0	0	0	0	0	1	0	0	0	0	0	0	0	0	0	0	0	0	0	1	1	0	0	0	0
A0A0H3NFN6	A0A0H3NFN6	1	1	1	tr|A0A0H3NFN6|A0A0H3NFN6_SALTS Prolipoprotein diacylglyceryl transferase OS=Salmonella typhimurium (strain SL1344) OX=216597 GN=lgt PE=3 SV=1	1	1	1	1	0	0	0	0	0	0	0	0	0	0	0	0	0	0	0	0	0	0	0	0	1	0	0	0	0	0	0	0	0	0	0	0	0	0	0	0	0	0	0	0
A0A0H3NFN8	A0A0H3NFN8	2	2	2	tr|A0A0H3NFN8|A0A0H3NFN8_SALTS RNA pyrophosphohydrolase OS=Salmonella typhimurium (strain SL1344) OX=216597 GN=nudH PE=3 SV=1	1	2	2	2	0	0	0	0	1	0	0	0	0	0	0	0	0	0	0	0	0	0	0	0	0	0	0	0	0	0	0	0	0	0	0	1	1	1	1	1	1	1	0	0
A0A0H3NFN9	A0A0H3NFN9	3	3	3	tr|A0A0H3NFN9|A0A0H3NFN9_SALTS ABC transporter integral membrane subunit OS=Salmonella typhimurium (strain SL1344) OX=216597 GN=ycfW PE=4 SV=1	1	3	3	3	0	0	0	0	0	0	0	0	0	0	0	0	0	0	0	0	0	0	0	0	2	0	0	0	0	0	0	0	0	0	0	0	0	0	0	0	0	0	0	0
A0A0H3NFP8	A0A0H3NFP8	7	7	7	tr|A0A0H3NFP8|A0A0H3NFP8_SALTS Uncharacterized protein OS=Salmonella typhimurium (strain SL1344) OX=216597 GN=ygeA PE=3 SV=1	1	7	7	7	6	6	5	2	3	0	0	0	0	0	0	0	0	0	0	0	0	0	0	0	0	0	1	1	5	1	0	0	0	0	0	0	0	0	0	0	0	0	0	0
A0A0H3NFP9	A0A0H3NFP9	4	4	4	tr|A0A0H3NFP9|A0A0H3NFP9_SALTS 4-deoxy-L-threo-5-hexosulose-uronate ketol-isomerase OS=Salmonella typhimurium (strain SL1344) OX=216597 GN=kduI PE=3 SV=1	1	4	4	4	0	0	1	3	2	0	0	0	0	0	0	0	0	0	0	0	0	0	0	0	0	0	0	0	1	0	0	0	0	0	0	0	0	0	0	0	0	0	0	0
A0A0H3NFQ1	A0A0H3NFQ1	5	5	5	tr|A0A0H3NFQ1|A0A0H3NFQ1_SALTS High frequency lysogenization protein HflD homolog OS=Salmonella typhimurium (strain SL1344) OX=216597 GN=ycfC PE=3 SV=1	1	5	5	5	0	0	0	0	0	0	0	0	0	0	0	0	0	0	0	1	0	0	0	0	2	2	0	0	0	0	0	0	0	0	0	0	0	0	0	0	0	0	0	0
A0A0H3NFQ4	A0A0H3NFQ4	3	3	3	tr|A0A0H3NFQ4|A0A0H3NFQ4_SALTS Uncharacterized protein OS=Salmonella typhimurium (strain SL1344) OX=216597 GN=yohL PE=4 SV=1	1	3	3	3	2	0	0	0	1	1	1	1	1	1	1	0	0	0	0	0	0	0	0	0	0	0	0	0	0	0	0	0	0	0	0	0	0	0	0	0	0	0	0	0
A0A0H3NFQ5	A0A0H3NFQ5	27	25	25	tr|A0A0H3NFQ5|A0A0H3NFQ5_SALTS Transaldolase OS=Salmonella typhimurium (strain SL1344) OX=216597 GN=tal PE=3 SV=1	1	27	25	25	20	24	22	20	19	16	13	8	1	0	0	0	0	0	0	0	0	0	0	0	0	5	5	6	20	5	4	4	4	2	2	2	1	1	1	0	0	0	0	0
A0A0H3NFQ6	A0A0H3NFQ6	37	37	37	tr|A0A0H3NFQ6|A0A0H3NFQ6_SALTS Isocitrate dehydrogenase [NADP] OS=Salmonella typhimurium (strain SL1344) OX=216597 GN=icdA PE=4 SV=1	1	37	37	37	25	31	30	32	31	27	24	24	22	19	20	6	11	4	3	2	0	1	1	0	4	14	14	24	34	24	18	12	11	7	9	7	7	5	4	3	4	0	1	1
A0A0H3NFR0	A0A0H3NFR0	3	3	3	tr|A0A0H3NFR0|A0A0H3NFR0_SALTS Probable fimbrial protein OS=Salmonella typhimurium (strain SL1344) OX=216597 GN=stdA PE=4 SV=1	1	3	3	3	0	0	0	0	0	0	0	0	0	0	0	0	0	0	0	0	0	0	0	0	0	0	0	0	0	0	0	0	0	0	1	0	1	2	2	2	0	0	0	0
A0A0H3NFR1	A0A0H3NFR1	3	3	3	tr|A0A0H3NFR1|A0A0H3NFR1_SALTS UPF0214 protein YfeW OS=Salmonella typhimurium (strain SL1344) OX=216597 GN=yfeW PE=3 SV=1	1	3	3	3	0	3	2	0	0	0	1	0	0	0	0	0	0	0	0	0	0	0	0	0	0	0	0	0	1	0	0	0	0	0	0	0	0	0	0	0	0	0	0	0
A0A0H3NFR4	A0A0H3NFR4	3	3	3	tr|A0A0H3NFR4|A0A0H3NFR4_SALTS tRNA(fMet)-specific endonuclease VapC OS=Salmonella typhimurium (strain SL1344) OX=216597 GN=vapC PE=3 SV=1	1	3	3	3	0	0	0	1	1	1	1	0	0	0	0	0	0	0	0	0	0	0	0	0	0	0	0	0	1	0	0	0	0	0	0	0	0	0	0	0	0	0	0	0
A0A0H3NFR7	A0A0H3NFR7	22	22	22	tr|A0A0H3NFR7|A0A0H3NFR7_SALTS Succinyl-diaminopimelate desuccinylase OS=Salmonella typhimurium (strain SL1344) OX=216597 GN=dapE PE=3 SV=1	1	22	22	22	11	14	15	13	15	9	5	3	1	0	1	1	0	0	0	0	0	0	0	0	0	2	7	9	17	9	8	6	3	2	1	1	0	0	0	0	0	0	0	0
A0A0H3NFR8	A0A0H3NFR8	43	43	43	tr|A0A0H3NFR8|A0A0H3NFR8_SALTS Lysine--tRNA ligase OS=Salmonella typhimurium (strain SL1344) OX=216597 GN=lysS PE=3 SV=1	1	43	43	43	26	37	37	38	36	33	29	26	22	19	18	8	15	2	4	3	0	0	0	0	0	16	9	22	40	26	19	18	17	13	9	8	6	2	2	2	2	2	2	0
A0A0H3NFR9	A0A0H3NFR9	9	9	9	tr|A0A0H3NFR9|A0A0H3NFR9_SALTS Hypothetical heat shock protein OS=Salmonella typhimurium (strain SL1344) OX=216597 GN=SL1344_1187 PE=3 SV=1	1	9	9	9	0	0	3	5	5	5	1	0	0	0	0	0	0	0	0	0	0	0	0	0	1	1	0	0	3	3	4	3	3	2	1	1	1	0	0	0	0	0	0	0
A0A0H3NFS0	A0A0H3NFS0	21	21	21	tr|A0A0H3NFS0|A0A0H3NFS0_SALTS Single-stranded DNA-specific exonuclease OS=Salmonella typhimurium (strain SL1344) OX=216597 GN=recJ PE=4 SV=1	1	21	21	21	0	1	5	9	8	11	11	5	3	3	4	1	0	0	0	0	0	0	0	0	0	1	0	0	1	4	4	4	4	2	1	1	1	0	0	0	0	0	0	0
A0A0H3NFS2	A0A0H3NFS2	3	3	3	tr|A0A0H3NFS2|A0A0H3NFS2_SALTS Flavodoxin OS=Salmonella typhimurium (strain SL1344) OX=216597 GN=fldB PE=3 SV=1	1	3	3	3	3	3	2	0	0	0	0	0	0	0	0	0	0	0	0	0	0	0	0	0	0	0	0	0	1	0	0	0	0	0	0	0	0	0	0	0	0	0	0	0
A0A0H3NFS3	A0A0H3NFS3	2	2	2	tr|A0A0H3NFS3|A0A0H3NFS3_SALTS Uncharacterized protein OS=Salmonella typhimurium (strain SL1344) OX=216597 GN=ygfY PE=4 SV=1	1	2	2	2	2	1	1	1	0	0	0	0	0	0	0	0	0	0	0	0	0	0	0	0	0	0	1	1	1	0	0	1	1	0	0	0	0	0	0	0	0	0	0	0
A0A0H3NFS6	A0A0H3NFS6	8	8	8	tr|A0A0H3NFS6|A0A0H3NFS6_SALTS UPF0267 protein YqfB OS=Salmonella typhimurium (strain SL1344) OX=216597 GN=yqfB PE=3 SV=1	1	8	8	8	7	6	5	3	4	0	2	0	0	0	0	0	0	0	0	0	0	0	0	0	0	1	3	4	4	2	2	1	1	1	1	1	1	1	0	0	0	0	0	0
A0A0H3NFS9	A0A0H3NFS9	4	4	4	tr|A0A0H3NFS9|A0A0H3NFS9_SALTS Uncharacterized protein OS=Salmonella typhimurium (strain SL1344) OX=216597 GN=SL1344_1197 PE=4 SV=1	1	4	4	4	3	3	3	2	1	1	0	0	0	0	0	0	0	0	0	0	0	0	0	0	0	0	1	1	4	0	0	0	0	0	0	0	0	0	0	0	0	0	0	0
A0A0H3NFT0	A0A0H3NFT0	20	20	20	tr|A0A0H3NFT0|A0A0H3NFT0_SALTS Aminomethyltransferase OS=Salmonella typhimurium (strain SL1344) OX=216597 GN=gcvT PE=3 SV=1	1	20	20	20	15	16	12	13	12	12	11	11	7	5	5	1	2	0	1	1	1	0	0	0	0	3	10	10	18	10	8	9	7	2	2	1	1	1	1	1	1	0	0	0
A0A0H3NFT1	A0A0H3NFT1	7	7	7	tr|A0A0H3NFT1|A0A0H3NFT1_SALTS 2-octaprenyl-6-methoxyphenol hydroxylase OS=Salmonella typhimurium (strain SL1344) OX=216597 GN=ubiH PE=4 SV=1	1	7	7	7	0	0	0	0	0	0	6	7	6	5	3	0	1	0	0	0	0	0	0	0	0	2	0	0	0	0	0	1	1	1	1	1	1	1	0	0	0	0	0	0
A0A0H3NFT3	A0A0H3NFT3	4	4	4	tr|A0A0H3NFT3|A0A0H3NFT3_SALTS Uncharacterized protein OS=Salmonella typhimurium (strain SL1344) OX=216597 GN=SL1344_1202 PE=4 SV=1	1	4	4	4	4	2	1	0	0	0	0	0	0	0	0	0	0	0	0	0	0	0	0	0	0	1	2	2	1	0	0	0	0	0	0	0	0	0	0	0	0	0	0	0
A0A0H3NFT4	A0A0H3NFT4	5	5	5	tr|A0A0H3NFT4|A0A0H3NFT4_SALTS Cell division protein ZapA OS=Salmonella typhimurium (strain SL1344) OX=216597 GN=ygfE PE=3 SV=1	1	5	5	5	4	5	5	5	4	3	3	3	3	3	1	0	1	0	0	0	0	0	0	0	1	1	1	1	5	1	1	0	0	0	0	0	0	0	0	0	0	0	0	0
A0A0H3NFT5	A0A0H3NFT5	20	20	20	tr|A0A0H3NFT5|A0A0H3NFT5_SALTS D-3-phosphoglycerate dehydrogenase OS=Salmonella typhimurium (strain SL1344) OX=216597 GN=serA PE=3 SV=1	1	20	20	20	0	7	13	16	13	13	11	8	5	4	2	0	0	0	0	0	0	0	0	0	0	1	0	1	16	6	6	2	1	0	0	0	1	0	0	0	0	0	0	0
A0A0H3NFT8	A0A0H3NFT8	11	11	11	tr|A0A0H3NFT8|A0A0H3NFT8_SALTS Uncharacterized protein OS=Salmonella typhimurium (strain SL1344) OX=216597 GN=yggE PE=4 SV=1	1	11	11	11	4	8	11	10	10	10	9	8	7	6	6	3	2	0	0	0	0	0	0	0	0	1	0	1	9	3	3	4	3	2	2	0	0	0	0	0	0	0	0	0
A0A0H3NFT9	A0A0H3NFT9	5	5	5	tr|A0A0H3NFT9|A0A0H3NFT9_SALTS Hypothetical membrane protein OS=Salmonella typhimurium (strain SL1344) OX=216597 GN=yggB PE=4 SV=1	1	5	5	5	0	0	0	0	0	0	0	0	0	0	0	0	0	0	0	0	0	0	0	0	5	1	0	0	0	0	0	0	0	0	0	0	0	0	0	0	0	0	0	0
A0A0H3NFU1	A0A0H3NFU1	6	6	6	tr|A0A0H3NFU1|A0A0H3NFU1_SALTS Predicted bacteriophage protein OS=Salmonella typhimurium (strain SL1344) OX=216597 GN=yeaO PE=4 SV=1	1	6	6	6	6	4	0	0	0	0	0	0	0	0	0	0	0	0	0	0	0	0	0	0	0	1	1	1	0	0	0	0	0	0	0	0	0	0	0	0	0	0	0	0
A0A0H3NFU2	A0A0H3NFU2	21	21	21	tr|A0A0H3NFU2|A0A0H3NFU2_SALTS D-erythrose-4-phosphate dehydrogenase OS=Salmonella typhimurium (strain SL1344) OX=216597 GN=epd PE=3 SV=1	1	21	21	21	5	9	11	10	10	5	4	3	2	0	0	0	0	0	0	0	0	0	0	0	0	4	1	4	13	7	6	5	4	3	1	0	0	0	0	0	0	0	0	0
A0A0H3NFU5	A0A0H3NFU5	1	1	1	tr|A0A0H3NFU5|A0A0H3NFU5_SALTS Uncharacterized protein OS=Salmonella typhimurium (strain SL1344) OX=216597 GN=yggG PE=3 SV=1	1	1	1	1	0	0	0	0	0	0	0	0	0	0	0	0	0	0	0	0	0	0	0	0	1	0	0	0	0	0	0	0	0	0	0	0	0	0	0	1	0	0	0	0
A0A0H3NFU7	A0A0H3NFU7	3	3	3	tr|A0A0H3NFU7|A0A0H3NFU7_SALTS Zinc binding dehydrogenase OS=Salmonella typhimurium (strain SL1344) OX=216597 GN=SL1344_3058 PE=3 SV=1	1	3	3	3	2	2	0	0	0	0	0	0	0	0	0	0	0	0	0	0	0	0	0	0	0	0	0	0	1	0	0	0	0	0	0	0	0	0	0	0	0	0	0	0
A0A0H3NFV2	A0A0H3NFV2	8	8	8	tr|A0A0H3NFV2|A0A0H3NFV2_SALTS Endonuclease I OS=Salmonella typhimurium (strain SL1344) OX=216597 GN=endA PE=4 SV=1	1	8	8	8	1	2	8	8	7	5	5	4	3	1	0	0	0	0	0	0	0	0	0	0	0	0	0	0	6	0	0	0	0	0	0	0	0	0	0	0	0	0	0	0
A0A0H3NFV3	A0A0H3NFV3	1	1	1	tr|A0A0H3NFV3|A0A0H3NFV3_SALTS Galactose-proton symport (Galactose transporter) OS=Salmonella typhimurium (strain SL1344) OX=216597 GN=galP PE=3 SV=1	1	1	1	1	0	0	0	0	0	0	0	0	0	0	0	0	0	0	0	0	0	0	0	0	0	0	0	0	0	0	0	0	0	0	0	0	0	0	0	0	0	0	0	0
A0A0H3NFV4	A0A0H3NFV4	5	5	5	tr|A0A0H3NFV4|A0A0H3NFV4_SALTS UPF0301 protein YqgE OS=Salmonella typhimurium (strain SL1344) OX=216597 GN=yqgE PE=3 SV=1	1	5	5	5	3	4	4	1	0	0	0	0	0	0	0	0	0	0	0	0	0	0	0	0	0	0	2	1	0	0	0	0	0	0	0	0	0	0	0	0	0	0	0	0
A0A0H3NFV7	A0A0H3NFV7	10	10	10	tr|A0A0H3NFV7|A0A0H3NFV7_SALTS Outer membrane protein assembly factor BamC OS=Salmonella typhimurium (strain SL1344) OX=216597 GN=nlpB PE=3 SV=1	1	10	10	10	4	2	0	0	0	0	0	1	1	2	2	2	2	2	2	2	0	0	0	0	5	0	0	0	1	0	0	0	0	0	0	0	0	0	0	0	0	0	0	1
A0A0H3NFV8	A0A0H3NFV8	12	12	12	tr|A0A0H3NFV8|A0A0H3NFV8_SALTS Hypothetical oxidoreductase OS=Salmonella typhimurium (strain SL1344) OX=216597 GN=SL1344_1223 PE=4 SV=1	1	12	12	12	11	9	7	6	5	4	4	5	4	2	1	0	0	0	0	0	0	0	0	0	0	0	0	0	8	0	0	0	0	0	0	0	0	0	0	0	0	0	0	0
A0A0H3NFV9	A0A0H3NFV9	10	10	10	tr|A0A0H3NFV9|A0A0H3NFV9_SALTS dITP/XTP pyrophosphatase OS=Salmonella typhimurium (strain SL1344) OX=216597 GN=yggV PE=3 SV=1	1	10	10	10	8	8	6	5	5	5	6	2	3	1	1	0	0	0	0	0	0	0	0	0	0	2	3	2	6	0	1	0	0	0	0	0	0	0	0	0	0	0	0	0
A0A0H3NFW0	A0A0H3NFW0	2	2	2	tr|A0A0H3NFW0|A0A0H3NFW0_SALTS Integral membrane protein OS=Salmonella typhimurium (strain SL1344) OX=216597 GN=yggT PE=4 SV=1	1	2	2	2	0	0	0	0	0	0	0	0	0	0	0	0	0	0	0	0	0	0	0	0	2	0	0	0	0	0	0	0	0	0	0	0	0	0	0	0	0	0	0	0
A0A0H3NFW2	A0A0H3NFW2	7	7	7	tr|A0A0H3NFW2|A0A0H3NFW2_SALTS Uncharacterized protein OS=Salmonella typhimurium (strain SL1344) OX=216597 GN=yeaC PE=4 SV=1	1	7	7	7	5	4	2	1	1	0	0	0	0	0	0	0	0	0	0	0	0	0	0	0	0	2	2	1	2	1	0	0	0	0	0	0	0	0	0	0	0	0	0	0
A0A0H3NFW3	A0A0H3NFW3	25	25	25	tr|A0A0H3NFW3|A0A0H3NFW3_SALTS L-asparaginase OS=Salmonella typhimurium (strain SL1344) OX=216597 GN=ansB PE=3 SV=1	1	25	25	25	5	15	19	21	19	20	17	19	18	18	18	8	11	5	5	3	3	2	0	1	8	10	3	13	21	18	17	16	14	10	9	10	8	8	8	6	6	3	4	4
A0A0H3NFW4	A0A0H3NFW4	5	5	5	tr|A0A0H3NFW4|A0A0H3NFW4_SALTS Uncharacterized protein OS=Salmonella typhimurium (strain SL1344) OX=216597 GN=yggL PE=4 SV=1	1	5	5	5	2	2	3	2	4	4	4	4	4	4	4	1	4	1	1	1	1	4	5	2	5	1	0	0	0	0	0	0	1	1	1	1	1	0	0	1	1	1	1	4
A0A0H3NFW7	A0A0H3NFW7	14	14	14	tr|A0A0H3NFW7|A0A0H3NFW7_SALTS Selenide, water dikinase OS=Salmonella typhimurium (strain SL1344) OX=216597 GN=selD PE=3 SV=1	1	14	14	14	11	12	11	9	10	8	6	4	4	4	4	2	2	2	1	1	1	0	0	0	2	6	7	7	11	6	6	5	3	2	3	3	2	4	4	1	4	2	2	1
A0A0H3NFW8	A0A0H3NFW8	14	14	14	tr|A0A0H3NFW8|A0A0H3NFW8_SALTS Probable Fe(2+)-trafficking protein OS=Salmonella typhimurium (strain SL1344) OX=216597 GN=yggX PE=3 SV=1	1	14	14	14	14	12	10	9	9	4	5	5	4	3	1	0	1	0	0	0	0	0	0	0	0	1	4	4	9	2	0	0	0	0	0	0	0	0	0	0	0	0	0	0
A0A0H3NFX0	A0A0H3NFX0	15	15	15	tr|A0A0H3NFX0|A0A0H3NFX0_SALTS Uracil phosphoribosyltransferase OS=Salmonella typhimurium (strain SL1344) OX=216597 GN=upp PE=3 SV=1	1	15	15	15	12	13	12	12	10	9	6	5	3	3	1	2	1	1	1	0	0	2	1	0	2	5	7	10	13	7	6	7	4	3	3	3	3	2	2	1	1	1	1	1
A0A0H3NFX6	A0A0H3NFX6	26	26	26	tr|A0A0H3NFX6|A0A0H3NFX6_SALTS Exodeoxyribonuclease III OS=Salmonella typhimurium (strain SL1344) OX=216597 GN=xthA PE=4 SV=1	1	26	26	26	22	24	18	16	12	11	10	8	7	3	3	0	1	0	0	0	0	0	0	0	0	4	6	6	17	4	4	2	1	1	1	0	0	0	0	0	0	0	0	0
A0A0H3NFX9	A0A0H3NFX9	1	1	1	tr|A0A0H3NFX9|A0A0H3NFX9_SALTS Uncharacterized protein OS=Salmonella typhimurium (strain SL1344) OX=216597 GN=SL1344_3101 PE=4 SV=1	1	1	1	1	1	1	0	0	0	0	0	0	0	0	0	0	0	0	0	0	0	0	0	0	0	0	0	0	0	0	0	0	0	0	0	0	0	0	0	0	0	0	0	0
A0A0H3NFY2	A0A0H3NFY2	2	2	2	tr|A0A0H3NFY2|A0A0H3NFY2_SALTS Uncharacterized protein OS=Salmonella typhimurium (strain SL1344) OX=216597 GN=SL1344_3106 PE=4 SV=1	1	2	2	2	0	0	0	0	0	0	1	1	2	1	1	0	0	0	0	0	0	0	0	0	0	0	0	0	0	0	0	0	0	0	0	0	0	0	0	0	0	0	0	0
A0A0H3NFY4	A0A0H3NFY4	30	30	30	tr|A0A0H3NFY4|A0A0H3NFY4_SALTS Uronate isomerase OS=Salmonella typhimurium (strain SL1344) OX=216597 GN=uxaC PE=3 SV=1	1	30	30	30	0	8	20	24	24	13	12	11	6	4	3	0	1	0	0	0	0	0	0	0	0	4	0	5	24	14	13	9	5	3	0	0	0	0	0	0	0	0	0	0
A0A0H3NFY5	A0A0H3NFY5	22	22	22	tr|A0A0H3NFY5|A0A0H3NFY5_SALTS Glutathionylspermidine synthetase/amidase OS=Salmonella typhimurium (strain SL1344) OX=216597 GN=gsp PE=4 SV=1	1	22	22	22	0	7	14	15	15	9	6	4	4	2	2	2	1	0	0	0	0	0	0	0	0	2	1	3	16	8	7	8	7	4	3	2	0	0	0	0	0	0	0	0
A0A0H3NFY6	A0A0H3NFY6	40	40	40	tr|A0A0H3NFY6|A0A0H3NFY6_SALTS GMP synthase [glutamine-hydrolyzing] OS=Salmonella typhimurium (strain SL1344) OX=216597 GN=guaA PE=3 SV=1	1	40	40	40	15	29	31	32	25	20	15	14	5	5	3	1	1	0	0	0	0	0	0	0	0	8	9	15	32	16	16	12	8	4	3	2	0	0	1	1	1	0	0	0
A0A0H3NFZ2	A0A0H3NFZ2	22	22	22	tr|A0A0H3NFZ2|A0A0H3NFZ2_SALTS Hydrogenase-2 large subunit OS=Salmonella typhimurium (strain SL1344) OX=216597 GN=hybC PE=3 SV=1	1	22	22	22	18	16	17	18	15	9	9	6	2	2	3	1	1	1	0	0	0	0	1	0	15	2	5	6	16	6	4	4	2	2	1	0	1	2	1	1	2	0	0	1
A0A0H3NFZ3	A0A0H3NFZ3	7	7	7	tr|A0A0H3NFZ3|A0A0H3NFZ3_SALTS PTS system, cellobiose-specific IIB component OS=Salmonella typhimurium (strain SL1344) OX=216597 GN=celA PE=4 SV=1	1	7	7	7	7	5	4	3	2	1	1	1	1	1	1	0	0	0	0	0	0	0	0	0	0	2	4	3	3	1	0	0	0	0	0	0	0	0	0	0	0	0	0	0
A0A0H3NFZ4	A0A0H3NFZ4	8	8	8	tr|A0A0H3NFZ4|A0A0H3NFZ4_SALTS Hydrogenase-2 small subunit OS=Salmonella typhimurium (strain SL1344) OX=216597 GN=hybA PE=4 SV=1	1	8	8	8	3	2	0	0	0	0	3	4	4	3	0	0	0	0	1	0	0	1	0	0	6	0	0	0	0	0	0	0	0	1	1	0	0	0	0	0	0	0	0	1
A0A0H3NFZ6	A0A0H3NFZ6	9	9	9	tr|A0A0H3NFZ6|A0A0H3NFZ6_SALTS Hypothetical membrane protein OS=Salmonella typhimurium (strain SL1344) OX=216597 GN=yfgM PE=4 SV=1	1	9	9	9	0	0	0	0	0	0	0	0	0	0	0	0	0	1	1	1	1	1	0	0	8	0	0	0	0	0	0	0	0	0	0	0	0	0	0	0	0	0	0	0
A0A0H3NFZ7	A0A0H3NFZ7	12	11	11	tr|A0A0H3NFZ7|A0A0H3NFZ7_SALTS Methyl-accepting chemotaxis protein OS=Salmonella typhimurium (strain SL1344) OX=216597 GN=SL1344_3126 PE=4 SV=1	1	12	11	11	0	0	0	0	0	0	0	0	0	0	1	0	0	0	1	0	0	1	1	0	12	1	0	0	0	0	0	0	0	0	0	0	0	0	0	0	0	0	0	1
A0A0H3NFZ8	A0A0H3NFZ8	4	4	4	tr|A0A0H3NFZ8|A0A0H3NFZ8_SALTS Chitooligosaccharide deacetylase OS=Salmonella typhimurium (strain SL1344) OX=216597 GN=celG PE=3 SV=1	1	4	4	4	1	2	1	1	0	0	1	0	0	0	0	0	0	0	0	0	0	0	0	0	0	1	1	1	0	1	1	0	0	0	0	0	0	0	0	0	0	0	0	0
A0A0H3NFZ9	A0A0H3NFZ9	1	1	1	tr|A0A0H3NFZ9|A0A0H3NFZ9_SALTS Exported protein OS=Salmonella typhimurium (strain SL1344) OX=216597 GN=SL1344_3128 PE=4 SV=1	1	1	1	1	0	0	0	0	0	0	0	0	0	0	0	0	0	0	0	0	0	0	0	0	1	0	0	0	0	0	0	0	0	0	0	0	0	0	0	0	0	0	0	0
A0A0H3NG01	A0A0H3NG01	12	12	12	tr|A0A0H3NG01|A0A0H3NG01_SALTS Nucleoside diphosphate kinase OS=Salmonella typhimurium (strain SL1344) OX=216597 GN=ndk PE=3 SV=1	1	12	12	12	9	10	9	9	8	8	7	7	7	6	6	3	4	2	1	0	0	0	0	0	1	5	9	10	11	9	9	8	6	4	3	2	1	1	1	1	1	0	1	1
A0A0H3NG02	A0A0H3NG02	17	17	17	tr|A0A0H3NG02|A0A0H3NG02_SALTS Possible oxidoreductase OS=Salmonella typhimurium (strain SL1344) OX=216597 GN=yghA PE=4 SV=1	1	17	17	17	4	12	14	15	15	15	13	9	8	9	7	3	2	2	1	1	1	0	0	0	0	4	2	6	16	8	8	6	7	5	3	3	3	2	1	1	1	0	0	0
A0A0H3NG03	A0A0H3NG03	11	11	11	tr|A0A0H3NG03|A0A0H3NG03_SALTS Hypothetical hydrolase OS=Salmonella typhimurium (strain SL1344) OX=216597 GN=yniC PE=4 SV=1	1	11	11	11	10	11	10	9	7	7	9	5	4	3	4	1	1	0	0	0	0	0	0	0	0	3	5	4	10	3	2	3	3	1	1	1	1	0	0	0	0	0	0	0
A0A0H3NG04	A0A0H3NG04	5	5	5	tr|A0A0H3NG04|A0A0H3NG04_SALTS Biopolymer transport ExbB protein OS=Salmonella typhimurium (strain SL1344) OX=216597 GN=exbB PE=3 SV=1	1	5	5	5	0	0	0	0	0	0	0	0	0	0	0	0	0	0	0	0	0	0	0	0	5	0	0	0	0	0	0	0	0	0	0	0	0	0	0	0	0	0	0	0
A0A0H3NG09	A0A0H3NG09	23	23	23	tr|A0A0H3NG09|A0A0H3NG09_SALTS Probable alcohol dehydrogenase OS=Salmonella typhimurium (strain SL1344) OX=216597 GN=yqhD PE=4 SV=1	1	23	23	23	9	19	17	18	16	10	7	6	5	4	1	1	0	0	0	0	0	0	0	0	0	4	5	10	19	8	8	6	4	1	1	1	1	0	0	0	0	0	0	0
A0A0H3NG11	A0A0H3NG11	39	39	39	tr|A0A0H3NG11|A0A0H3NG11_SALTS Peptidase B OS=Salmonella typhimurium (strain SL1344) OX=216597 GN=pepB PE=3 SV=1	1	39	39	39	0	1	13	33	35	31	28	24	18	13	10	1	2	0	0	0	0	0	0	0	0	8	0	0	13	19	20	22	20	14	9	7	6	1	1	1	0	0	0	0
A0A0H3NG12	A0A0H3NG12	7	7	7	tr|A0A0H3NG12|A0A0H3NG12_SALTS Uncharacterized protein OS=Salmonella typhimurium (strain SL1344) OX=216597 GN=SL1344_3141 PE=4 SV=1	1	7	7	7	7	7	3	1	1	1	0	0	0	0	0	0	0	0	0	0	0	0	0	0	0	0	1	1	4	1	1	1	1	0	0	0	0	0	0	0	0	0	0	0
A0A0H3NG15	A0A0H3NG15	13	13	13	tr|A0A0H3NG15|A0A0H3NG15_SALTS Hypothetical membrane transport protein (Periplasmic component) OS=Salmonella typhimurium (strain SL1344) OX=216597 GN=SL1344_3143 PE=4 SV=1	1	13	13	13	10	12	10	2	1	1	0	0	0	0	0	0	0	0	0	0	0	0	0	0	0	0	1	2	6	0	0	0	0	0	0	0	0	0	0	0	0	0	0	0
A0A0H3NG17	A0A0H3NG17	16	16	16	tr|A0A0H3NG17|A0A0H3NG17_SALTS Cell division protein FtsP OS=Salmonella typhimurium (strain SL1344) OX=216597 GN=sufI PE=3 SV=1	1	16	16	16	12	10	8	3	1	0	0	0	0	0	0	0	0	0	0	0	0	0	0	0	0	0	1	3	6	0	0	0	0	0	0	0	0	0	0	0	0	0	0	0
A0A0H3NG18	A0A0H3NG18	7	7	7	tr|A0A0H3NG18|A0A0H3NG18_SALTS Iron-binding protein IscA OS=Salmonella typhimurium (strain SL1344) OX=216597 GN=iscA PE=3 SV=1	1	7	7	7	7	7	7	5	5	3	3	1	0	0	0	0	0	0	0	0	0	0	0	0	0	1	1	2	5	0	1	0	0	0	1	0	0	0	0	0	0	0	0	0
A0A0H3NG19	A0A0H3NG19	22	22	22	tr|A0A0H3NG19|A0A0H3NG19_SALTS DNA topoisomerase 4 subunit A OS=Salmonella typhimurium (strain SL1344) OX=216597 GN=parC PE=3 SV=1	1	22	22	22	0	6	13	13	15	11	12	6	5	4	2	0	4	1	4	2	2	1	0	0	4	2	1	1	11	3	2	4	3	2	2	0	0	0	0	0	0	0	0	0
A0A0H3NG20	A0A0H3NG20	25	25	25	tr|A0A0H3NG20|A0A0H3NG20_SALTS Phenylalanine--tRNA ligase alpha subunit OS=Salmonella typhimurium (strain SL1344) OX=216597 GN=pheS PE=3 SV=1	1	25	25	25	1	7	20	23	23	20	17	15	14	8	8	0	3	0	0	0	0	0	0	0	0	6	0	3	23	15	14	14	12	8	3	2	2	2	0	0	0	0	0	0
A0A0H3NG22	A0A0H3NG22	19	19	19	tr|A0A0H3NG22|A0A0H3NG22_SALTS Inositol-1-monophosphatase OS=Salmonella typhimurium (strain SL1344) OX=216597 GN=suhB PE=3 SV=1	1	19	19	19	11	15	12	10	9	8	6	4	4	4	4	1	2	0	1	0	0	0	0	0	1	8	9	12	16	8	6	5	5	2	0	1	0	0	0	0	0	0	0	0
A0A0H3NG23	A0A0H3NG23	5	5	5	tr|A0A0H3NG23|A0A0H3NG23_SALTS Probable two-component system response regulator OS=Salmonella typhimurium (strain SL1344) OX=216597 GN=ygiX PE=4 SV=1	1	5	5	5	3	3	0	0	0	0	0	0	0	0	0	0	0	0	0	0	0	0	0	0	1	1	2	2	0	0	0	0	0	0	0	0	0	0	0	0	0	0	0	0
A0A0H3NG24	A0A0H3NG24	9	9	9	tr|A0A0H3NG24|A0A0H3NG24_SALTS Hypothetical oxidoreductase OS=Salmonella typhimurium (strain SL1344) OX=216597 GN=mdaB PE=4 SV=1	1	9	9	9	8	7	6	4	3	1	0	0	0	0	0	0	0	0	0	0	0	0	0	0	0	0	2	3	5	1	0	0	0	0	0	0	0	0	0	0	0	0	0	0
A0A0H3NG26	A0A0H3NG26	2	2	2	tr|A0A0H3NG26|A0A0H3NG26_SALTS Uncharacterized protein OS=Salmonella typhimurium (strain SL1344) OX=216597 GN=yqiA PE=4 SV=1	1	2	2	2	2	2	2	1	0	0	0	0	0	0	0	0	0	0	0	0	0	0	0	0	0	0	0	0	0	0	0	0	0	0	0	0	0	0	0	0	0	0	0	0
A0A0H3NG30	A0A0H3NG30	9	9	9	tr|A0A0H3NG30|A0A0H3NG30_SALTS Phospho-2-dehydro-3-deoxyheptonate aldolase OS=Salmonella typhimurium (strain SL1344) OX=216597 GN=aroH PE=3 SV=1	1	9	9	9	3	6	6	2	0	0	1	0	0	0	0	0	0	0	0	0	0	0	0	0	0	0	0	2	6	1	1	0	0	0	0	0	1	1	0	0	0	0	0	0
A0A0H3NG32	A0A0H3NG32	7	7	7	tr|A0A0H3NG32|A0A0H3NG32_SALTS UPF0441 protein YgiB OS=Salmonella typhimurium (strain SL1344) OX=216597 GN=ygiB PE=3 SV=1	1	7	7	7	1	2	1	2	1	1	1	1	1	1	1	0	0	1	0	1	0	1	0	0	5	0	0	0	1	0	0	0	0	0	0	0	0	0	0	0	0	0	0	0
A0A0H3NG33	A0A0H3NG33	9	9	9	tr|A0A0H3NG33|A0A0H3NG33_SALTS Flavohemoprotein OS=Salmonella typhimurium (strain SL1344) OX=216597 GN=hmpA PE=3 SV=1	1	9	9	9	7	7	5	1	1	0	0	0	0	0	0	0	0	0	0	0	0	0	0	0	0	0	3	2	6	2	2	1	1	0	0	0	0	0	0	0	0	0	0	0
A0A0H3NG34	A0A0H3NG34	1	1	1	tr|A0A0H3NG34|A0A0H3NG34_SALTS Uncharacterized protein OS=Salmonella typhimurium (strain SL1344) OX=216597 GN=ygiD PE=4 SV=1	1	1	1	1	1	1	1	1	0	0	0	0	0	0	0	0	0	0	0	0	0	0	0	0	0	0	0	0	1	0	0	0	0	0	0	0	0	0	0	0	0	0	0	0
A0A0H3NG37	A0A0H3NG37	12	12	12	tr|A0A0H3NG37|A0A0H3NG37_SALTS Nitrogen regulatory protein p-II OS=Salmonella typhimurium (strain SL1344) OX=216597 GN=glnB PE=3 SV=1	1	12	12	12	12	11	7	6	6	5	3	2	2	1	1	0	0	0	0	0	0	0	0	0	1	1	3	4	6	3	3	3	1	0	0	0	0	0	0	0	0	0	0	0
A0A0H3NG38	A0A0H3NG38	7	7	7	tr|A0A0H3NG38|A0A0H3NG38_SALTS Thiol:disulfide interchange protein DsbL OS=Salmonella typhimurium (strain SL1344) OX=216597 GN=dsbL PE=3 SV=1	1	7	7	7	6	4	2	0	0	0	0	0	0	0	0	0	0	0	0	0	0	0	0	0	0	0	2	2	1	0	0	0	0	0	0	0	0	0	0	0	0	0	0	0
A0A0H3NG39	A0A0H3NG39	13	13	13	tr|A0A0H3NG39|A0A0H3NG39_SALTS 3,4-dihydroxy-2-butanone 4-phosphate synthase OS=Salmonella typhimurium (strain SL1344) OX=216597 GN=ribB PE=3 SV=1	1	13	13	13	8	11	8	7	5	4	4	2	0	0	0	0	0	0	0	0	0	0	0	0	0	3	6	4	9	4	3	2	1	1	1	1	1	0	0	0	0	0	0	0
A0A0H3NG44	A0A0H3NG44	26	26	26	tr|A0A0H3NG44|A0A0H3NG44_SALTS Bifunctional protein HldE OS=Salmonella typhimurium (strain SL1344) OX=216597 GN=rfaE PE=3 SV=1	1	26	26	26	22	21	21	19	19	16	13	11	8	5	3	0	0	0	0	0	0	0	0	0	4	6	10	11	21	7	7	8	4	1	1	0	0	0	0	0	0	0	0	0
A0A0H3NG46	A0A0H3NG46	4	4	4	tr|A0A0H3NG46|A0A0H3NG46_SALTS Hypothetical transcriptional regulator OS=Salmonella typhimurium (strain SL1344) OX=216597 GN=yfhH PE=4 SV=1	1	4	4	4	0	0	1	1	1	2	2	1	1	1	1	0	1	0	0	0	0	0	0	0	0	1	0	0	0	0	1	1	1	0	0	0	0	0	0	0	0	0	0	0
A0A0H3NG48	A0A0H3NG48	4	4	4	tr|A0A0H3NG48|A0A0H3NG48_SALTS Hypothetical signal transduction protein OS=Salmonella typhimurium (strain SL1344) OX=216597 GN=ygiM PE=4 SV=1	1	4	4	4	0	0	0	0	0	0	0	0	0	0	0	0	0	0	0	0	0	0	0	0	4	0	0	0	0	0	0	0	0	0	0	0	0	0	0	0	0	0	0	0
A0A0H3NG51	A0A0H3NG51	2	2	2	tr|A0A0H3NG51|A0A0H3NG51_SALTS Holo-[acyl-carrier-protein] synthase OS=Salmonella typhimurium (strain SL1344) OX=216597 GN=acpS PE=3 SV=1	1	2	2	2	0	0	0	0	0	0	0	0	0	0	0	0	0	0	0	0	0	1	1	1	0	0	1	0	0	0	0	0	0	0	0	0	0	0	0	0	0	0	0	0
A0A0H3NG52	A0A0H3NG52	13	13	13	tr|A0A0H3NG52|A0A0H3NG52_SALTS tRNA N6-adenosine threonylcarbamoyltransferase OS=Salmonella typhimurium (strain SL1344) OX=216597 GN=gcp PE=3 SV=1	1	13	13	13	10	5	5	2	1	1	0	0	0	0	0	0	0	0	0	1	0	0	0	0	1	0	4	2	6	1	1	1	0	0	0	0	0	0	0	0	0	0	1	1
A0A0H3NG53	A0A0H3NG53	2	2	2	tr|A0A0H3NG53|A0A0H3NG53_SALTS Uncharacterized protein OS=Salmonella typhimurium (strain SL1344) OX=216597 GN=sufA PE=3 SV=1	1	2	2	2	1	0	0	0	0	0	0	0	0	0	0	0	0	0	0	0	0	0	0	0	0	0	1	1	1	0	0	0	0	0	0	0	0	0	0	0	0	0	0	0
A0A0H3NG55	A0A0H3NG55	8	8	8	tr|A0A0H3NG55|A0A0H3NG55_SALTS DNA primase OS=Salmonella typhimurium (strain SL1344) OX=216597 GN=dnaG PE=3 SV=1	1	8	8	8	6	7	4	1	2	1	2	0	0	0	0	0	0	0	0	0	0	0	0	0	0	0	1	1	3	0	0	0	0	0	0	0	0	0	0	0	0	0	0	0
A0A0H3NG56	A0A0H3NG56	9	9	9	tr|A0A0H3NG56|A0A0H3NG56_SALTS Signal peptidase I OS=Salmonella typhimurium (strain SL1344) OX=216597 GN=lepB PE=3 SV=1	1	9	9	9	0	0	0	0	0	0	0	0	0	0	0	0	1	1	1	2	1	0	0	0	7	0	0	0	0	0	0	0	0	0	0	0	0	0	0	0	0	0	0	0
A0A0H3NG57	A0A0H3NG57	9	9	9	tr|A0A0H3NG57|A0A0H3NG57_SALTS Uncharacterized protein OS=Salmonella typhimurium (strain SL1344) OX=216597 GN=yqjH PE=4 SV=1	1	9	9	9	9	7	3	1	0	0	0	0	0	0	0	0	0	0	0	0	0	0	0	0	0	1	2	1	3	0	0	0	0	0	0	0	0	0	0	0	0	0	0	0
A0A0H3NG58	A0A0H3NG58	2	2	2	tr|A0A0H3NG58|A0A0H3NG58_SALTS Cysteine desulfuration protein SufE OS=Salmonella typhimurium (strain SL1344) OX=216597 GN=ynhA PE=3 SV=1	1	2	2	2	1	1	0	0	0	0	0	0	0	0	0	0	0	0	0	0	0	0	0	0	0	0	1	0	0	0	0	0	0	0	0	0	0	0	0	0	0	0	0	0
A0A0H3NG60	A0A0H3NG60	16	15	15	tr|A0A0H3NG60|A0A0H3NG60_SALTS Methyl-accepting chemotaxis protein II OS=Salmonella typhimurium (strain SL1344) OX=216597 GN=SL1344_3189 PE=4 SV=1	1	16	15	15	0	0	0	0	0	0	0	0	0	0	1	1	2	0	3	1	0	2	2	0	11	1	0	0	0	0	0	0	0	0	0	0	1	0	0	0	0	0	0	2
A0A0H3NG62	A0A0H3NG62	16	16	16	tr|A0A0H3NG62|A0A0H3NG62_SALTS 2,4-dienoyl-CoA reductase [NADPH] (Ec 1.3.1.34) (2,4-dienoyl coenzyme A reductase) OS=Salmonella typhimurium (strain SL1344) OX=216597 GN=fadH PE=4 SV=1	1	16	16	16	5	11	9	4	2	0	0	0	0	0	0	0	0	0	0	0	0	0	0	0	0	0	0	2	6	1	0	0	0	0	0	0	0	0	0	0	0	0	0	0
A0A0H3NG75	A0A0H3NG75	3	3	3	tr|A0A0H3NG75|A0A0H3NG75_SALTS Hypothetical pathogenicity island protein OS=Salmonella typhimurium (strain SL1344) OX=216597 GN=orf319 PE=4 SV=1	1	3	3	3	1	1	1	1	2	1	1	1	1	0	0	0	0	0	0	0	0	0	0	0	0	0	0	0	0	0	0	1	1	0	0	0	0	0	0	0	0	0	0	0
A0A0H3NG78	A0A0H3NG78	11	11	11	tr|A0A0H3NG78|A0A0H3NG78_SALTS Possible LysR-family transcriptional regulator OS=Salmonella typhimurium (strain SL1344) OX=216597 GN=yhaJ PE=4 SV=1	1	11	11	11	0	5	9	9	8	4	3	3	1	1	0	0	0	0	0	0	0	0	0	0	0	1	0	1	8	1	2	1	1	0	0	0	0	0	0	0	0	0	0	0
A0A0H3NG83	A0A0H3NG83	10	9	9	tr|A0A0H3NG83|A0A0H3NG83_SALTS L-serine dehydratase OS=Salmonella typhimurium (strain SL1344) OX=216597 GN=tdcG PE=4 SV=1	1	10	9	9	3	6	5	3	3	1	1	1	1	1	0	0	1	0	1	0	0	1	0	0	0	0	0	0	4	0	0	0	0	0	0	0	0	0	0	0	0	0	0	0
A0A0H3NG85	A0A0H3NG85	5	5	5	tr|A0A0H3NG85|A0A0H3NG85_SALTS Propionate kinase OS=Salmonella typhimurium (strain SL1344) OX=216597 GN=tdcD PE=3 SV=1	1	5	5	5	0	2	3	1	0	0	0	0	0	0	0	0	0	0	0	0	0	0	0	0	0	0	0	0	1	0	0	0	0	0	0	0	0	0	0	0	0	0	0	0
A0A0H3NG91	A0A0H3NG91	19	19	19	tr|A0A0H3NG91|A0A0H3NG91_SALTS 2-hydroxy-3-oxopropionate reductase OS=Salmonella typhimurium (strain SL1344) OX=216597 GN=garRb PE=3 SV=1	1	19	19	19	4	13	12	14	11	10	9	7	4	2	2	1	1	0	0	0	0	0	0	1	1	5	3	7	13	7	8	6	4	2	3	3	1	1	1	0	0	0	0	0
A0A0H3NG93	A0A0H3NG93	5	5	5	tr|A0A0H3NG93|A0A0H3NG93_SALTS Probable carbohydrate kinase OS=Salmonella typhimurium (strain SL1344) OX=216597 GN=SL1344_3224 PE=4 SV=1	1	5	5	5	4	3	2	2	0	1	1	2	1	1	0	0	0	0	0	0	0	0	0	0	0	0	1	1	2	0	0	0	0	0	0	0	0	0	0	0	0	0	0	0
A0A0H3NG96	A0A0H3NG96	16	16	16	tr|A0A0H3NG96|A0A0H3NG96_SALTS D-tagatose-1,6-bisphosphate aldolase subunit GatY OS=Salmonella typhimurium (strain SL1344) OX=216597 GN=gatY PE=3 SV=1	1	16	16	16	12	10	7	4	1	3	3	2	2	0	0	0	0	0	0	0	0	0	0	0	0	1	2	2	5	1	0	0	0	0	0	0	0	0	0	0	0	0	0	0
A0A0H3NGA0	A0A0H3NGA0	4	4	4	tr|A0A0H3NGA0|A0A0H3NGA0_SALTS PTS system, galactitol-specific IIA component OS=Salmonella typhimurium (strain SL1344) OX=216597 GN=gatA PE=4 SV=1	1	4	4	4	3	2	0	0	0	0	0	0	0	0	0	0	0	0	0	0	0	0	0	0	0	0	2	1	0	0	0	0	0	0	0	0	0	0	0	0	0	0	0	0
A0A0H3NGA4	A0A0H3NGA4	6	6	6	tr|A0A0H3NGA4|A0A0H3NGA4_SALTS Hypothetical DNA-binding protein OS=Salmonella typhimurium (strain SL1344) OX=216597 GN=SL1344_2593 PE=4 SV=1	1	6	6	6	6	4	3	2	1	0	1	0	0	0	0	0	0	0	0	0	0	0	0	0	0	0	1	0	3	1	1	1	0	0	0	0	0	0	0	0	0	0	0	0
A0A0H3NGA5	A0A0H3NGA5	11	11	11	tr|A0A0H3NGA5|A0A0H3NGA5_SALTS Ribosomal RNA small subunit methyltransferase I OS=Salmonella typhimurium (strain SL1344) OX=216597 GN=yraL PE=3 SV=1	1	11	11	11	5	8	4	0	1	0	0	0	0	0	0	0	0	0	0	0	0	0	0	0	3	2	5	5	4	0	0	0	0	0	0	0	0	0	0	0	0	0	0	0
A0A0H3NGA8	A0A0H3NGA8	8	8	8	tr|A0A0H3NGA8|A0A0H3NGA8_SALTS DnaA initiator-associating protein DiaA OS=Salmonella typhimurium (strain SL1344) OX=216597 GN=yraO PE=3 SV=1	1	8	8	8	6	4	2	1	0	0	0	0	0	1	0	0	0	0	0	0	0	0	0	0	1	1	3	2	1	1	1	1	1	1	1	0	0	0	0	0	0	1	0	0
A0A0H3NGB2	A0A0H3NGB2	12	12	12	tr|A0A0H3NGB2|A0A0H3NGB2_SALTS Riboflavin synthase alpha chain OS=Salmonella typhimurium (strain SL1344) OX=216597 GN=ribE PE=4 SV=1	1	12	12	12	10	10	10	8	9	8	7	5	2	1	1	0	0	0	0	0	0	0	0	0	0	4	4	7	10	4	4	3	2	1	1	1	1	1	1	1	0	0	0	0
A0A0H3NGB5	A0A0H3NGB5	5	5	5	tr|A0A0H3NGB5|A0A0H3NGB5_SALTS RNA polymerase sigma factor OS=Salmonella typhimurium (strain SL1344) OX=216597 GN=rpoE PE=3 SV=1	1	5	5	5	0	0	0	0	0	1	2	3	1	0	1	0	0	0	0	0	0	0	0	0	3	0	0	0	0	0	0	0	0	0	0	0	0	0	0	0	0	0	0	0
A0A0H3NGB6	A0A0H3NGB6	7	7	7	tr|A0A0H3NGB6|A0A0H3NGB6_SALTS Uncharacterized protein OS=Salmonella typhimurium (strain SL1344) OX=216597 GN=yhbT PE=4 SV=1	1	7	7	7	0	0	0	0	0	1	3	6	4	3	1	0	0	0	0	0	0	0	0	0	0	1	0	0	0	0	0	0	2	2	2	2	2	1	0	0	0	0	0	0
A0A0H3NGB7	A0A0H3NGB7	10	10	10	tr|A0A0H3NGB7|A0A0H3NGB7_SALTS Superoxide dismutase OS=Salmonella typhimurium (strain SL1344) OX=216597 GN=sodB PE=3 SV=1	1	10	10	10	10	10	10	9	9	8	8	8	8	8	8	5	7	4	3	3	2	2	1	0	1	4	10	9	10	8	8	8	6	5	5	5	5	3	4	4	3	2	2	2
A0A0H3NGB9	A0A0H3NGB9	5	5	5	tr|A0A0H3NGB9|A0A0H3NGB9_SALTS Possible monooxygenase OS=Salmonella typhimurium (strain SL1344) OX=216597 GN=yhbW PE=4 SV=1	1	5	5	5	1	2	3	0	1	0	0	0	0	0	0	0	0	0	0	0	0	0	0	0	0	0	0	0	2	0	0	0	0	0	0	0	0	0	0	0	0	0	0	0
A0A0H3NGC2	A0A0H3NGC2	28	28	28	tr|A0A0H3NGC2|A0A0H3NGC2_SALTS N-ethylmaleimide reductase OS=Salmonella typhimurium (strain SL1344) OX=216597 GN=nemA PE=4 SV=1	1	28	28	28	19	18	13	12	9	10	7	6	5	4	2	1	1	0	0	1	0	0	0	0	0	4	11	11	18	5	3	3	3	2	2	3	2	1	1	0	0	0	0	0
A0A0H3NGC5	A0A0H3NGC5	12	12	12	tr|A0A0H3NGC5|A0A0H3NGC5_SALTS 30S ribosomal protein S15 OS=Salmonella typhimurium (strain SL1344) OX=216597 GN=rpsO PE=3 SV=1	1	12	12	12	3	3	3	3	4	5	5	5	5	8	10	5	6	5	5	1	4	11	8	7	6	3	1	1	3	1	1	2	3	3	7	7	7	8	8	7	6	3	3	6
A0A0H3NGC6	A0A0H3NGC6	2	2	2	tr|A0A0H3NGC6|A0A0H3NGC6_SALTS Uncharacterized protein OS=Salmonella typhimurium (strain SL1344) OX=216597 GN=yfiP PE=4 SV=1	1	2	2	2	0	0	0	0	0	0	0	0	0	0	0	0	0	0	0	0	0	0	0	0	0	0	0	0	0	0	0	0	0	0	0	0	0	0	0	0	0	0	0	0
A0A0H3NGC8	A0A0H3NGC8	67	67	67	tr|A0A0H3NGC8|A0A0H3NGC8_SALTS Translation initiation factor IF-2 OS=Salmonella typhimurium (strain SL1344) OX=216597 GN=infB PE=3 SV=1	1	67	67	67	44	49	41	39	37	30	27	24	18	16	17	11	17	8	11	8	6	10	4	4	37	16	18	19	33	15	12	12	10	10	10	8	8	6	6	5	4	3	4	5
A0A0H3NGD0	A0A0H3NGD0	5	5	5	tr|A0A0H3NGD0|A0A0H3NGD0_SALTS Ribosome maturation factor RimP OS=Salmonella typhimurium (strain SL1344) OX=216597 GN=yhbC PE=3 SV=1	1	5	5	5	3	3	0	0	0	0	0	1	1	1	1	0	0	0	0	0	0	0	0	0	0	1	0	1	1	1	1	1	2	1	1	3	1	1	1	1	1	1	1	0
A0A0H3NGD1	A0A0H3NGD1	1	1	1	tr|A0A0H3NGD1|A0A0H3NGD1_SALTS Uncharacterized protein OS=Salmonella typhimurium (strain SL1344) OX=216597 GN=SL1344_2619 PE=4 SV=1	1	1	1	1	0	0	0	0	0	1	1	1	1	0	0	0	0	0	0	0	0	0	0	0	0	0	0	0	0	0	0	0	0	0	0	0	0	0	0	0	0	0	0	0
A0A0H3NGD2	A0A0H3NGD2	7	7	7	tr|A0A0H3NGD2|A0A0H3NGD2_SALTS Anhydro-N-acetylmuramic acid kinase OS=Salmonella typhimurium (strain SL1344) OX=216597 GN=anmK PE=3 SV=1	1	7	7	7	5	6	5	3	2	2	1	1	1	0	0	0	0	0	0	0	0	0	0	0	0	1	1	2	4	1	1	0	0	0	0	0	0	0	0	0	0	0	0	0
A0A0H3NGD3	A0A0H3NGD3	2	2	2	tr|A0A0H3NGD3|A0A0H3NGD3_SALTS Protein-export membrane protein OS=Salmonella typhimurium (strain SL1344) OX=216597 GN=secG PE=4 SV=1	1	2	2	2	1	1	0	0	0	0	0	0	1	0	1	0	1	0	1	1	1	1	0	0	2	0	0	0	0	0	0	0	0	0	0	0	0	0	0	0	0	0	0	0
A0A0H3NGD5	A0A0H3NGD5	10	10	10	tr|A0A0H3NGD5|A0A0H3NGD5_SALTS Dihydropteroate synthase OS=Salmonella typhimurium (strain SL1344) OX=216597 GN=folP PE=3 SV=1	1	10	10	10	5	8	4	1	1	3	1	0	1	0	0	0	0	0	0	0	0	0	0	0	0	1	1	2	4	1	0	0	0	0	0	0	0	0	0	0	0	0	0	0
A0A0H3NGD6	A0A0H3NGD6	8	8	8	tr|A0A0H3NGD6|A0A0H3NGD6_SALTS Hypothetical sigma(54) modulation protein OS=Salmonella typhimurium (strain SL1344) OX=216597 GN=yfiA PE=4 SV=1	1	8	8	8	6	6	6	5	5	5	6	5	4	4	5	3	4	2	4	2	3	5	6	5	6	2	5	4	5	4	4	4	3	2	1	2	3	2	2	2	2	2	2	3
A0A0H3NGD7	A0A0H3NGD7	4	4	4	tr|A0A0H3NGD7|A0A0H3NGD7_SALTS Uncharacterized protein OS=Salmonella typhimurium (strain SL1344) OX=216597 GN=yhbY PE=4 SV=1	1	4	4	4	2	3	3	3	3	3	3	3	3	3	3	1	3	2	3	2	3	3	3	1	3	1	1	1	2	1	1	1	1	1	1	1	1	1	1	1	1	1	1	2
A0A0H3NGD9	A0A0H3NGD9	17	17	17	tr|A0A0H3NGD9|A0A0H3NGD9_SALTS Glutathione S-transferase OS=Salmonella typhimurium (strain SL1344) OX=216597 GN=gst PE=4 SV=1	1	17	17	17	16	14	13	12	11	8	7	6	6	3	4	1	3	0	1	0	0	1	0	0	3	4	12	11	16	6	5	3	3	3	3	3	3	2	1	1	0	0	0	0
A0A0H3NGE0	A0A0H3NGE0	8	8	8	tr|A0A0H3NGE0|A0A0H3NGE0_SALTS Penicillin-binding protein (D-alanyl-D-alanine carboxypeptidase) OS=Salmonella typhimurium (strain SL1344) OX=216597 GN=dacB PE=4 SV=1	1	8	8	8	0	4	4	3	1	0	0	0	0	0	0	0	0	0	0	0	0	0	0	0	1	0	0	0	1	0	0	0	0	0	0	0	0	0	0	0	0	0	0	0
A0A0H3NGE3	A0A0H3NGE3	10	10	10	tr|A0A0H3NGE3|A0A0H3NGE3_SALTS 50S ribosomal protein L27 OS=Salmonella typhimurium (strain SL1344) OX=216597 GN=rpmA PE=3 SV=1	1	10	10	10	1	1	1	1	1	1	2	1	0	1	1	1	1	1	2	1	2	5	6	6	6	4	1	0	0	1	1	0	1	1	1	1	1	1	2	7	8	8	7	8
A0A0H3NGE4	A0A0H3NGE4	12	12	12	tr|A0A0H3NGE4|A0A0H3NGE4_SALTS Octaprenyl-diphosphate synthase OS=Salmonella typhimurium (strain SL1344) OX=216597 GN=ispB PE=3 SV=1	1	12	12	12	7	10	8	6	7	5	4	3	2	2	0	0	0	0	0	0	0	0	0	0	0	3	4	5	9	3	3	3	1	2	1	0	0	1	0	0	0	0	0	0
A0A0H3NGE8	A0A0H3NGE8	4	4	4	tr|A0A0H3NGE8|A0A0H3NGE8_SALTS Uncharacterized protein OS=Salmonella typhimurium (strain SL1344) OX=216597 GN=yrbA PE=3 SV=1	1	4	4	4	4	3	3	3	2	1	1	0	0	0	0	0	0	0	0	0	0	0	0	0	0	0	0	0	1	0	0	0	0	0	0	0	0	0	0	0	0	0	0	0
A0A0H3NGE9	A0A0H3NGE9	16	16	16	tr|A0A0H3NGE9|A0A0H3NGE9_SALTS Possible exported protein OS=Salmonella typhimurium (strain SL1344) OX=216597 GN=yrbC PE=4 SV=1	1	16	16	16	16	14	12	9	8	7	4	4	4	2	3	0	1	0	0	0	0	0	0	0	0	5	9	8	12	4	2	2	1	1	1	1	1	0	0	0	0	0	0	0
A0A0H3NGF1	A0A0H3NGF1	2	2	2	sp|A0A0H3NGF1|YDGT_SALTS Transcription modulator YdgT OS=Salmonella typhimurium (strain SL1344) OX=216597 GN=ydgT PE=3 SV=1	1	2	2	2	2	2	2	1	1	0	0	0	0	0	0	0	0	0	0	0	0	0	0	0	0	0	0	0	1	0	0	0	0	0	0	0	0	0	0	0	0	0	0	0
A0A0H3NGF2	A0A0H3NGF2	3	3	3	tr|A0A0H3NGF2|A0A0H3NGF2_SALTS Possible ABC-transport protein, ATP-binding component OS=Salmonella typhimurium (strain SL1344) OX=216597 GN=yrbF PE=4 SV=1	1	3	3	3	1	1	0	0	0	0	2	2	2	2	1	0	0	0	0	0	0	0	0	0	2	0	1	1	0	0	0	0	0	0	0	0	0	0	0	0	0	0	0	0
A0A0H3NGF4	A0A0H3NGF4	22	22	22	tr|A0A0H3NGF4|A0A0H3NGF4_SALTS Arabinose 5-phosphate isomerase OS=Salmonella typhimurium (strain SL1344) OX=216597 GN=yrbH PE=3 SV=1	1	22	22	22	1	15	15	11	13	12	7	4	2	0	0	0	0	0	0	0	0	0	0	0	0	3	0	4	12	5	5	3	2	1	2	2	1	1	1	0	0	0	0	0
A0A0H3NGF5	A0A0H3NGF5	18	18	18	tr|A0A0H3NGF5|A0A0H3NGF5_SALTS Predicted bacteriophage protein OS=Salmonella typhimurium (strain SL1344) OX=216597 GN=SL1344_2644 PE=4 SV=1	1	18	18	18	0	0	1	6	10	15	15	15	14	14	14	7	10	3	2	0	0	0	0	0	2	1	0	0	1	1	4	5	7	7	7	6	6	4	4	1	1	1	0	1
A0A0H3NGF6	A0A0H3NGF6	47	47	38	tr|A0A0H3NGF6|A0A0H3NGF6_SALTS Fumarate hydratase class I OS=Salmonella typhimurium (strain SL1344) OX=216597 GN=fumA PE=3 SV=1	1	47	47	38	21	39	44	43	42	38	35	34	26	25	23	8	16	8	6	5	2	1	0	0	2	12	6	20	38	24	22	19	19	17	10	8	5	3	2	2	3	0	1	3
A0A0H3NGF7	A0A0H3NGF7	7	7	7	tr|A0A0H3NGF7|A0A0H3NGF7_SALTS Lipopolysaccharide export system protein LptA OS=Salmonella typhimurium (strain SL1344) OX=216597 GN=yhbN PE=3 SV=1	1	7	7	7	7	5	5	5	4	4	3	3	1	1	1	0	0	0	1	0	0	0	0	0	0	0	2	1	5	1	0	1	1	0	1	0	0	0	0	0	0	0	0	0
A0A0H3NGF9	A0A0H3NGF9	16	16	16	tr|A0A0H3NGF9|A0A0H3NGF9_SALTS RNA polymerase sigma-54 factor OS=Salmonella typhimurium (strain SL1344) OX=216597 GN=rpoN PE=3 SV=1	1	16	16	16	0	0	0	1	12	13	12	7	4	2	1	0	0	0	0	0	0	0	0	0	0	1	0	0	0	3	6	7	6	6	3	2	2	1	0	0	0	0	0	0
A0A0H3NGG0	A0A0H3NGG0	18	18	18	tr|A0A0H3NGG0|A0A0H3NGG0_SALTS 30S ribosomal protein S16 OS=Salmonella typhimurium (strain SL1344) OX=216597 GN=rps16 PE=3 SV=1	1	18	18	18	4	5	3	5	6	5	4	4	5	7	10	8	9	7	8	7	7	12	11	10	8	5	3	1	3	3	4	6	5	5	8	11	15	12	11	9	8	7	8	11
A0A0H3NGG1	A0A0H3NGG1	14	14	14	tr|A0A0H3NGG1|A0A0H3NGG1_SALTS RNase adapter protein RapZ OS=Salmonella typhimurium (strain SL1344) OX=216597 GN=yhbJ PE=3 SV=1	1	14	14	14	1	7	11	12	10	4	4	4	3	2	1	1	1	0	0	0	0	0	0	0	1	4	0	6	7	5	6	4	3	2	2	0	0	1	1	0	0	0	0	0
A0A0H3NGG5	A0A0H3NGG5	18	18	18	tr|A0A0H3NGG5|A0A0H3NGG5_SALTS Protein GrpE OS=Salmonella typhimurium (strain SL1344) OX=216597 GN=grpE PE=3 SV=1	1	18	18	18	12	16	16	15	14	15	13	10	8	4	3	3	3	2	1	1	1	2	2	1	2	3	5	5	16	4	4	4	5	5	3	3	3	3	3	3	2	2	2	2
A0A0H3NGG7	A0A0H3NGG7	19	19	19	tr|A0A0H3NGG7|A0A0H3NGG7_SALTS Aerobic respiration control sensor protein OS=Salmonella typhimurium (strain SL1344) OX=216597 GN=arcB PE=4 SV=1	1	19	19	19	5	4	4	2	1	0	1	0	0	0	0	0	0	0	0	1	1	0	0	0	10	0	1	1	1	1	1	1	1	0	0	0	0	0	0	0	0	0	0	0
A0A0H3NGG8	A0A0H3NGG8	42	42	42	tr|A0A0H3NGG8|A0A0H3NGG8_SALTS Glutamate synthase [NADPH] large chain OS=Salmonella typhimurium (strain SL1344) OX=216597 GN=gltB PE=4 SV=1	1	42	42	42	0	1	27	30	28	23	16	7	3	0	0	0	0	0	0	0	0	0	0	0	0	4	0	0	19	6	9	8	3	2	2	0	0	0	0	0	0	0	0	0
A0A0H3NGG9	A0A0H3NGG9	16	16	16	tr|A0A0H3NGG9|A0A0H3NGG9_SALTS NAD(P) transhydrogenase subunit alpha OS=Salmonella typhimurium (strain SL1344) OX=216597 GN=pntA PE=3 SV=1	1	16	16	16	0	0	0	0	0	0	0	0	0	0	1	1	0	0	0	0	0	3	3	3	15	3	0	0	0	0	0	0	0	0	0	0	0	0	2	2	1	1	1	2
A0A0H3NGH0	A0A0H3NGH0	1	1	1	tr|A0A0H3NGH0|A0A0H3NGH0_SALTS Uncharacterized protein OS=Salmonella typhimurium (strain SL1344) OX=216597 GN=yfjG PE=4 SV=1	1	1	1	1	0	1	0	0	0	0	0	0	1	0	0	0	0	0	0	0	0	0	0	0	1	0	0	0	0	0	0	0	0	0	0	0	0	0	0	0	0	0	0	0
A0A0H3NGH3	A0A0H3NGH3	8	8	8	tr|A0A0H3NGH3|A0A0H3NGH3_SALTS Uncharacterized protein OS=Salmonella typhimurium (strain SL1344) OX=216597 GN=yhcH PE=4 SV=1	1	8	8	8	8	5	4	3	2	2	3	2	1	1	1	1	1	0	0	0	0	0	0	0	0	2	4	4	4	3	4	3	2	2	1	1	1	1	1	1	1	1	1	1
A0A0H3NGH5	A0A0H3NGH5	1	1	1	tr|A0A0H3NGH5|A0A0H3NGH5_SALTS HTH-type transcriptional repressor NanR OS=Salmonella typhimurium (strain SL1344) OX=216597 GN=yhcK PE=3 SV=1	1	1	1	1	1	1	1	0	0	0	1	0	0	0	0	0	0	0	0	0	0	0	0	0	1	0	0	0	0	0	0	0	0	0	0	0	0	0	0	0	0	0	0	0
A0A0H3NGH7	A0A0H3NGH7	2	2	2	tr|A0A0H3NGH7|A0A0H3NGH7_SALTS Hypothetical type I secretion protein OS=Salmonella typhimurium (strain SL1344) OX=216597 GN=SL1344_2664 PE=4 SV=1	1	2	2	2	1	0	0	0	0	0	0	0	0	0	0	0	0	0	0	0	0	0	0	0	1	0	0	0	0	0	0	0	0	0	0	0	0	0	0	0	0	0	0	0
A0A0H3NGH9	A0A0H3NGH9	7	7	7	tr|A0A0H3NGH9|A0A0H3NGH9_SALTS ATP-dependent dethiobiotin synthetase BioD OS=Salmonella typhimurium (strain SL1344) OX=216597 GN=bioDb PE=3 SV=1	1	7	7	7	6	7	5	3	3	1	1	1	1	1	0	0	0	0	0	0	0	0	0	0	1	0	0	2	3	0	0	0	0	0	0	0	0	0	0	0	1	0	0	0
A0A0H3NGI3	A0A0H3NGI3	16	16	16	tr|A0A0H3NGI3|A0A0H3NGI3_SALTS 50S ribosomal protein L13 OS=Salmonella typhimurium (strain SL1344) OX=216597 GN=rplM PE=3 SV=1	1	16	16	16	3	3	4	6	8	4	7	7	8	8	8	3	10	6	12	8	13	14	12	10	13	5	0	0	1	1	2	0	1	1	0	1	1	3	4	8	9	11	11	14
A0A0H3NGI5	A0A0H3NGI5	1	1	1	tr|A0A0H3NGI5|A0A0H3NGI5_SALTS Uncharacterized protein OS=Salmonella typhimurium (strain SL1344) OX=216597 GN=SL1344_3322 PE=4 SV=1	1	1	1	1	0	0	1	0	0	0	0	0	0	0	0	0	0	0	0	0	0	0	0	0	0	0	0	0	0	0	0	0	0	0	0	0	0	0	0	0	0	0	0	0
A0A0H3NGI6	A0A0H3NGI6	35	35	35	tr|A0A0H3NGI6|A0A0H3NGI6_SALTS Periplasmic serine endoprotease DegP-like OS=Salmonella typhimurium (strain SL1344) OX=216597 GN=degQ PE=3 SV=1	1	35	35	35	14	19	21	28	30	30	29	26	21	17	10	2	2	0	1	1	1	0	0	0	3	9	6	7	20	15	17	20	19	12	9	4	2	1	1	1	1	0	0	0
A0A0H3NGI8	A0A0H3NGI8	15	15	15	tr|A0A0H3NGI8|A0A0H3NGI8_SALTS Guanine nucleotide exchange factor OS=Salmonella typhimurium (strain SL1344) OX=216597 GN=sopE PE=3 SV=1	1	15	15	15	13	14	12	10	9	8	6	6	6	6	6	2	6	2	1	1	1	4	1	0	8	2	2	2	11	1	2	1	0	0	0	0	1	1	1	1	1	0	2	5
A0A0H3NGJ3	A0A0H3NGJ3	6	6	6	tr|A0A0H3NGJ3|A0A0H3NGJ3_SALTS Arginine repressor OS=Salmonella typhimurium (strain SL1344) OX=216597 GN=argR PE=3 SV=1	1	6	6	6	5	5	5	5	4	0	0	0	0	0	0	0	0	0	0	0	0	0	0	0	0	1	2	2	4	2	0	1	1	1	0	0	0	0	0	0	0	1	1	0
A0A0H3NGJ4	A0A0H3NGJ4	4	4	4	tr|A0A0H3NGJ4|A0A0H3NGJ4_SALTS Possible GntR-family transcriptional regulator OS=Salmonella typhimurium (strain SL1344) OX=216597 GN=SL1344_3330 PE=4 SV=1	1	4	4	4	2	3	3	3	3	1	0	1	0	1	1	1	0	0	0	0	0	0	0	0	0	0	0	0	1	0	1	0	0	0	0	0	0	0	0	0	0	0	0	0
A0A0H3NGJ8	A0A0H3NGJ8	2	2	2	tr|A0A0H3NGJ8|A0A0H3NGJ8_SALTS Uncharacterized protein OS=Salmonella typhimurium (strain SL1344) OX=216597 GN=yhcO PE=4 SV=1	1	2	2	2	2	0	0	0	0	0	0	0	0	0	0	0	0	0	0	0	0	0	0	0	0	0	0	0	0	0	0	0	0	0	0	0	0	0	0	0	0	0	0	0
A0A0H3NGK0	A0A0H3NGK0	18	18	18	tr|A0A0H3NGK0|A0A0H3NGK0_SALTS Ribonuclease G OS=Salmonella typhimurium (strain SL1344) OX=216597 GN=cafA PE=4 SV=1	1	18	18	18	0	9	11	11	10	6	7	4	1	0	0	0	0	0	0	0	0	0	1	0	0	3	1	4	15	7	5	4	2	1	1	0	0	0	0	0	0	0	0	0
A0A0H3NGK1	A0A0H3NGK1	17	17	17	tr|A0A0H3NGK1|A0A0H3NGK1_SALTS TldD protein OS=Salmonella typhimurium (strain SL1344) OX=216597 GN=tldD PE=4 SV=1	1	17	17	17	4	9	9	8	5	6	6	8	8	4	3	1	1	1	1	0	0	0	0	0	0	3	3	5	11	6	6	5	4	4	4	3	1	0	0	0	0	0	0	0
A0A0H3NGK4	A0A0H3NGK4	8	8	8	tr|A0A0H3NGK4|A0A0H3NGK4_SALTS Cell shape-determining protein MreC OS=Salmonella typhimurium (strain SL1344) OX=216597 GN=mreC PE=3 SV=1	1	8	8	8	0	0	0	1	0	0	0	0	0	1	0	0	0	0	0	0	0	0	0	0	5	0	0	0	0	1	1	0	0	0	0	0	0	0	0	0	0	0	0	0
A0A0H3NGK5	A0A0H3NGK5	2	2	2	tr|A0A0H3NGK5|A0A0H3NGK5_SALTS Hypothetical lipoprotein OS=Salmonella typhimurium (strain SL1344) OX=216597 GN=yhdA PE=4 SV=1	1	2	2	2	0	0	0	0	1	1	1	1	1	1	1	0	0	0	0	0	0	0	0	0	1	0	0	0	0	0	0	0	0	0	0	0	0	0	0	0	0	0	0	0
A0A0H3NGK8	A0A0H3NGK8	3	3	3	tr|A0A0H3NGK8|A0A0H3NGK8_SALTS Bacteriophage integrase OS=Salmonella typhimurium (strain SL1344) OX=216597 GN=SL1344_2709 PE=4 SV=1	1	3	3	3	0	0	0	0	0	2	2	1	1	2	1	0	0	0	0	0	0	0	0	0	0	0	0	0	0	0	0	0	0	0	0	0	0	0	0	0	0	0	0	0
A0A0H3NGL0	A0A0H3NGL0	27	27	27	tr|A0A0H3NGL0|A0A0H3NGL0_SALTS Biotin carboxylase OS=Salmonella typhimurium (strain SL1344) OX=216597 GN=accC PE=4 SV=1	1	27	27	27	23	25	25	24	25	22	22	16	13	11	10	3	4	1	2	1	1	0	0	0	2	7	10	10	23	11	12	10	8	6	5	4	3	2	2	2	2	0	1	0
A0A0H3NGL1	A0A0H3NGL1	9	9	9	tr|A0A0H3NGL1|A0A0H3NGL1_SALTS Uncharacterized protein OS=Salmonella typhimurium (strain SL1344) OX=216597 GN=SL1344_2715 PE=4 SV=1	1	9	9	9	0	0	0	3	4	6	6	5	3	3	3	0	0	0	0	0	0	0	0	0	0	0	0	0	0	1	1	1	4	4	1	1	0	0	0	0	0	0	0	0
A0A0H3NGL3	A0A0H3NGL3	7	7	7	tr|A0A0H3NGL3|A0A0H3NGL3_SALTS Ribosomal protein L11 methyltransferase OS=Salmonella typhimurium (strain SL1344) OX=216597 GN=prmA PE=3 SV=1	1	7	7	7	7	6	5	3	2	0	1	0	0	0	0	0	0	0	0	0	0	0	0	0	0	3	5	5	5	3	1	0	1	0	0	0	0	0	0	0	0	0	0	0
A0A0H3NGL5	A0A0H3NGL5	5	5	5	tr|A0A0H3NGL5|A0A0H3NGL5_SALTS DNA-binding protein Fis OS=Salmonella typhimurium (strain SL1344) OX=216597 GN=fis PE=3 SV=1	1	5	5	5	0	0	1	4	4	4	4	4	5	4	4	3	4	3	3	3	2	2	0	0	0	2	0	0	0	2	4	4	4	3	3	3	3	3	3	3	3	2	2	2
A0A0H3NGL6	A0A0H3NGL6	8	8	8	tr|A0A0H3NGL6|A0A0H3NGL6_SALTS Hypothetical regulatory protein OS=Salmonella typhimurium (strain SL1344) OX=216597 GN=ydfH PE=4 SV=1	1	8	8	8	5	6	6	3	3	2	2	2	2	2	0	0	0	0	0	0	0	0	0	0	0	0	0	0	2	0	0	0	1	0	1	0	0	0	0	0	0	0	0	0
A0A0H3NGM0	A0A0H3NGM0	10	10	10	tr|A0A0H3NGM0|A0A0H3NGM0_SALTS Hypothetical periplasmic protein OS=Salmonella typhimurium (strain SL1344) OX=216597 GN=ydeI PE=4 SV=1	1	10	10	10	10	8	5	2	2	2	1	0	0	0	0	0	0	0	0	0	0	0	0	0	0	1	2	2	3	2	1	0	0	0	0	0	0	0	0	0	0	0	0	0
A0A0H3NGM6	A0A0H3NGM6	9	9	9	tr|A0A0H3NGM6|A0A0H3NGM6_SALTS Hypothetical transferase OS=Salmonella typhimurium (strain SL1344) OX=216597 GN=yrdA PE=4 SV=1	1	9	9	9	4	4	4	3	4	4	5	2	0	0	1	0	0	0	0	0	0	0	0	0	0	0	3	3	3	2	2	2	1	1	1	0	0	0	0	0	0	0	0	0
A0A0H3NGM7	A0A0H3NGM7	4	4	4	tr|A0A0H3NGM7|A0A0H3NGM7_SALTS Hypothetical transcriptional regulator OS=Salmonella typhimurium (strain SL1344) OX=216597 GN=SL1344_2732 PE=4 SV=1	1	4	4	4	3	2	2	2	1	0	0	0	0	0	0	0	0	0	0	0	0	0	0	0	0	1	2	1	1	0	0	0	0	0	0	0	0	0	0	0	0	0	0	0
A0A0H3NGM8	A0A0H3NGM8	12	12	12	tr|A0A0H3NGM8|A0A0H3NGM8_SALTS Shikimate dehydrogenase (NADP(+)) OS=Salmonella typhimurium (strain SL1344) OX=216597 GN=aroE PE=3 SV=1	1	12	12	12	10	11	7	6	4	1	1	0	0	0	0	0	0	0	0	0	0	0	0	0	0	3	5	4	6	3	1	0	0	0	1	0	0	0	0	0	0	0	0	0
A0A0H3NGN2	A0A0H3NGN2	11	11	11	tr|A0A0H3NGN2|A0A0H3NGN2_SALTS Peptide deformylase OS=Salmonella typhimurium (strain SL1344) OX=216597 GN=def PE=3 SV=1	1	11	11	11	10	7	6	7	6	6	5	4	3	3	4	3	0	0	0	0	0	0	0	0	0	4	7	7	5	3	2	2	3	0	0	0	0	0	0	0	0	0	0	1
A0A0H3NGN8	A0A0H3NGN8	2	2	2	tr|A0A0H3NGN8|A0A0H3NGN8_SALTS Hydrogenase 1 maturation protease OS=Salmonella typhimurium (strain SL1344) OX=216597 GN=hyaD2 PE=4 SV=1	1	2	2	2	2	1	0	0	0	0	0	0	0	0	0	0	0	0	0	0	0	0	0	0	0	0	0	0	0	0	0	0	0	0	0	0	0	0	0	0	0	0	0	0
A0A0H3NGP1	A0A0H3NGP1	6	6	6	tr|A0A0H3NGP1|A0A0H3NGP1_SALTS Potassium transport protein OS=Salmonella typhimurium (strain SL1344) OX=216597 GN=sapG PE=4 SV=1	1	6	6	6	2	6	1	0	0	0	0	0	0	0	0	0	0	0	0	0	0	0	0	0	0	1	1	1	1	0	0	0	0	0	0	0	0	0	0	0	0	0	0	0
A0A0H3NGP3	A0A0H3NGP3	9	9	9	tr|A0A0H3NGP3|A0A0H3NGP3_SALTS Hypothetical regulatory protein OS=Salmonella typhimurium (strain SL1344) OX=216597 GN=SL1344_1470 PE=4 SV=1	1	9	9	9	6	3	2	0	0	0	2	3	3	3	4	3	3	2	2	1	1	1	0	0	2	1	0	0	2	0	0	0	0	0	0	0	0	1	1	2	2	2	2	0
A0A0H3NGP6	A0A0H3NGP6	36	36	36	tr|A0A0H3NGP6|A0A0H3NGP6_SALTS 30S ribosomal protein S4 OS=Salmonella typhimurium (strain SL1344) OX=216597 GN=rpsD PE=3 SV=1	1	36	36	36	11	11	11	10	11	14	14	15	21	23	26	13	19	8	14	11	16	27	24	17	20	10	3	3	12	3	3	6	7	9	20	23	22	20	18	17	15	9	9	22
A0A0H3NGP7	A0A0H3NGP7	19	19	19	tr|A0A0H3NGP7|A0A0H3NGP7_SALTS 50S ribosomal protein L17 OS=Salmonella typhimurium (strain SL1344) OX=216597 GN=rplQ PE=3 SV=1	1	19	19	19	4	5	6	6	4	6	4	5	4	5	5	5	6	9	13	11	14	14	11	8	9	2	0	0	3	0	1	1	0	1	2	4	4	5	6	9	10	10	9	11
A0A0H3NGQ1	A0A0H3NGQ1	24	24	24	tr|A0A0H3NGQ1|A0A0H3NGQ1_SALTS 50S ribosomal protein L15 OS=Salmonella typhimurium (strain SL1344) OX=216597 GN=rplO PE=3 SV=1	1	24	24	24	2	2	2	2	4	4	6	8	7	8	7	2	9	5	13	10	13	18	17	10	15	6	1	1	0	1	1	1	2	2	2	2	3	4	5	12	14	15	14	20
A0A0H3NGQ4	A0A0H3NGQ4	4	4	4	tr|A0A0H3NGQ4|A0A0H3NGQ4_SALTS 50S ribosomal protein L36 OS=Salmonella typhimurium (strain SL1344) OX=216597 GN=rpmJb PE=3 SV=1	1	4	4	4	0	0	0	0	0	0	0	0	0	0	0	0	0	1	3	3	3	1	1	1	1	0	0	0	0	0	0	0	0	0	0	0	0	0	0	0	0	0	0	1
A0A0H3NGQ6	A0A0H3NGQ6	13	13	13	tr|A0A0H3NGQ6|A0A0H3NGQ6_SALTS Hypothetical transcriptional regulator OS=Salmonella typhimurium (strain SL1344) OX=216597 GN=mig-14 PE=4 SV=1	1	13	13	13	0	0	0	0	0	1	7	10	11	8	5	2	4	1	3	0	0	0	0	0	4	2	0	0	0	0	0	0	4	3	4	3	3	1	2	1	1	0	0	0
A0A0H3NGQ8	A0A0H3NGQ8	17	17	17	tr|A0A0H3NGQ8|A0A0H3NGQ8_SALTS 30S ribosomal protein S8 OS=Salmonella typhimurium (strain SL1344) OX=216597 GN=rpsH PE=3 SV=1	1	17	17	17	5	3	3	4	3	3	6	9	9	11	13	9	10	7	8	6	9	12	12	9	11	4	2	3	4	1	2	4	5	6	8	11	11	8	10	9	9	7	7	11
A0A0H3NGR0	A0A0H3NGR0	12	12	12	tr|A0A0H3NGR0|A0A0H3NGR0_SALTS 50S ribosomal protein L18 OS=Salmonella typhimurium (strain SL1344) OX=216597 GN=rl18 PE=3 SV=1	1	12	12	12	3	3	3	3	3	3	3	4	4	3	2	1	5	2	8	4	5	7	6	6	6	3	1	1	2	1	1	1	1	1	1	1	1	1	2	5	5	5	6	6
A0A0H3NGR4	A0A0H3NGR4	9	9	9	tr|A0A0H3NGR4|A0A0H3NGR4_SALTS 30S ribosomal protein S17 OS=Salmonella typhimurium (strain SL1344) OX=216597 GN=rpsQ PE=3 SV=1	1	9	9	9	2	2	2	2	2	2	2	2	3	4	5	4	4	4	5	5	5	7	6	3	4	2	3	2	2	2	2	2	3	3	3	4	5	4	5	4	4	4	4	5
A0A0H3NGR5	A0A0H3NGR5	18	18	18	tr|A0A0H3NGR5|A0A0H3NGR5_SALTS 50S ribosomal protein L24 OS=Salmonella typhimurium (strain SL1344) OX=216597 GN=rplX PE=3 SV=1	1	18	18	18	7	7	5	6	6	8	8	8	8	8	10	7	11	11	16	13	16	15	13	10	11	7	3	3	5	3	3	4	2	1	1	2	3	4	7	11	13	13	14	15
A0A0H3NGR7	A0A0H3NGR7	38	38	38	tr|A0A0H3NGR7|A0A0H3NGR7_SALTS NAD-dependent malic enzyme OS=Salmonella typhimurium (strain SL1344) OX=216597 GN=sfcA PE=3 SV=1	1	38	38	38	12	23	27	33	36	33	30	24	16	8	6	1	1	0	0	0	0	0	0	0	0	5	4	4	25	14	12	13	12	11	8	6	3	4	2	1	1	0	0	0
A0A0H3NGR9	A0A0H3NGR9	13	13	13	tr|A0A0H3NGR9|A0A0H3NGR9_SALTS 30S ribosomal protein S19 OS=Salmonella typhimurium (strain SL1344) OX=216597 GN=rpsS PE=3 SV=1	1	13	13	13	3	4	1	2	4	3	5	5	7	8	9	6	7	3	5	3	5	9	7	6	7	4	0	0	5	4	3	4	4	4	6	8	10	8	8	6	8	5	4	9
A0A0H3NGS0	A0A0H3NGS0	38	38	38	tr|A0A0H3NGS0|A0A0H3NGS0_SALTS 30S ribosomal protein S3 OS=Salmonella typhimurium (strain SL1344) OX=216597 GN=rpsC PE=3 SV=1	1	38	38	38	0	0	0	1	1	4	6	8	14	18	19	13	17	11	11	10	10	29	26	19	24	11	0	1	2	1	3	4	7	7	20	23	27	23	22	21	18	15	15	25
A0A0H3NGS2	A0A0H3NGS2	13	12	12	tr|A0A0H3NGS2|A0A0H3NGS2_SALTS DNA-binding protein OS=Salmonella typhimurium (strain SL1344) OX=216597 GN=stpA PE=3 SV=1	1	13	12	12	4	5	4	5	11	11	11	11	11	11	12	7	11	7	9	4	4	5	2	1	1	2	0	1	3	1	2	2	4	5	5	5	6	5	5	5	5	3	2	7
A0A0H3NGS4	A0A0H3NGS4	19	19	19	tr|A0A0H3NGS4|A0A0H3NGS4_SALTS 30S ribosomal protein S10 OS=Salmonella typhimurium (strain SL1344) OX=216597 GN=rpsJ PE=3 SV=1	1	19	19	19	6	6	5	6	7	8	8	8	9	11	11	10	12	9	11	9	13	14	10	9	10	6	3	3	5	3	3	3	4	4	6	6	7	11	11	10	8	6	7	13
A0A0H3NGS5	A0A0H3NGS5	22	22	22	tr|A0A0H3NGS5|A0A0H3NGS5_SALTS 50S ribosomal protein L4 OS=Salmonella typhimurium (strain SL1344) OX=216597 GN=rplD PE=3 SV=1	1	22	22	22	0	0	0	1	3	4	7	6	7	7	7	5	11	8	13	8	9	17	13	12	15	8	0	0	0	0	0	0	1	1	2	4	5	6	5	10	14	13	12	15
A0A0H3NGS7	A0A0H3NGS7	28	28	28	tr|A0A0H3NGS7|A0A0H3NGS7_SALTS 30S ribosomal protein S7 OS=Salmonella typhimurium (strain SL1344) OX=216597 GN=rpsG PE=3 SV=1	1	28	28	28	6	5	5	6	7	10	13	14	16	16	16	14	15	10	14	10	15	22	19	16	16	9	2	2	8	3	3	3	6	7	12	14	16	14	15	15	13	13	14	19
A0A0H3NGS9	A0A0H3NGS9	2	2	2	tr|A0A0H3NGS9|A0A0H3NGS9_SALTS Alkyl hydroperoxide reductase AhpD OS=Salmonella typhimurium (strain SL1344) OX=216597 GN=SL1344_2788 PE=3 SV=1	1	2	2	2	0	0	1	1	0	0	0	0	0	0	0	0	0	0	0	0	0	0	0	0	0	0	0	0	1	0	0	0	0	0	0	0	0	0	0	0	0	0	0	0
A0A0H3NGT1	A0A0H3NGT1	7	7	7	tr|A0A0H3NGT1|A0A0H3NGT1_SALTS Uncharacterized protein OS=Salmonella typhimurium (strain SL1344) OX=216597 GN=yheO PE=4 SV=1	1	7	7	7	3	5	5	4	6	5	5	5	4	3	2	0	1	0	0	0	0	0	0	0	2	2	1	1	3	3	3	4	3	4	3	3	2	0	0	0	0	0	0	0
A0A0H3NGT2	A0A0H3NGT2	7	7	7	tr|A0A0H3NGT2|A0A0H3NGT2_SALTS Uncharacterized protein OS=Salmonella typhimurium (strain SL1344) OX=216597 GN=yddE PE=4 SV=1	1	7	7	7	3	2	2	1	0	0	0	0	0	0	0	0	0	0	0	0	0	0	0	0	0	1	3	3	3	2	2	1	0	0	0	0	0	0	0	0	0	0	0	0
A0A0H3NGT4	A0A0H3NGT4	5	5	5	tr|A0A0H3NGT4|A0A0H3NGT4_SALTS Ribonucleoside-diphosphate reductase subunit beta OS=Salmonella typhimurium (strain SL1344) OX=216597 GN=nrdF PE=3 SV=1	1	5	5	5	1	2	3	0	1	0	0	0	0	0	0	0	0	0	0	0	0	0	0	0	0	0	0	0	1	0	0	0	0	0	0	0	0	0	0	0	0	0	0	0
A0A0H3NGT5	A0A0H3NGT5	4	4	4	tr|A0A0H3NGT5|A0A0H3NGT5_SALTS Protein TusC OS=Salmonella typhimurium (strain SL1344) OX=216597 GN=yheM PE=3 SV=1	1	4	4	4	0	1	2	1	1	1	0	0	0	0	0	0	0	0	0	0	0	0	0	0	0	1	2	2	3	2	2	2	1	0	0	0	0	0	0	0	0	0	0	0
A0A0H3NGT8	A0A0H3NGT8	15	15	15	tr|A0A0H3NGT8|A0A0H3NGT8_SALTS Possible ATP-binding protein OS=Salmonella typhimurium (strain SL1344) OX=216597 GN=SL1344_1517 PE=4 SV=1	1	15	15	15	12	12	12	9	7	7	5	1	0	0	1	1	0	0	0	0	0	0	0	0	0	3	8	7	9	7	6	3	2	0	0	0	0	0	0	0	0	0	0	0
A0A0H3NGT9	A0A0H3NGT9	9	9	9	tr|A0A0H3NGT9|A0A0H3NGT9_SALTS Hypothetical transcriptional regulator OS=Salmonella typhimurium (strain SL1344) OX=216597 GN=emrR PE=4 SV=1	1	9	9	9	7	8	6	6	4	4	2	3	1	2	1	1	2	0	0	1	1	1	0	0	1	0	1	1	4	1	1	1	0	0	0	0	0	1	0	0	0	0	0	0
A0A0H3NGU1	A0A0H3NGU1	5	5	5	tr|A0A0H3NGU1|A0A0H3NGU1_SALTS Uncharacterized protein OS=Salmonella typhimurium (strain SL1344) OX=216597 GN=yheT PE=4 SV=1	1	5	5	5	0	0	0	0	0	0	2	3	5	2	2	2	2	2	1	1	0	1	0	0	2	0	0	0	0	0	0	0	0	0	0	0	0	0	0	0	0	0	0	0
A0A0H3NGU2	A0A0H3NGU2	6	6	6	tr|A0A0H3NGU2|A0A0H3NGU2_SALTS Peptidyl-prolyl cis-trans isomerase OS=Salmonella typhimurium (strain SL1344) OX=216597 GN=slyD PE=3 SV=1	1	6	6	6	6	5	6	4	4	3	1	2	1	3	3	0	0	0	0	0	0	1	1	1	2	4	6	6	6	4	4	4	4	3	3	3	2	2	1	1	1	1	1	1
A0A0H3NGU5	A0A0H3NGU5	21	21	21	tr|A0A0H3NGU5|A0A0H3NGU5_SALTS Glutamate--cysteine ligase OS=Salmonella typhimurium (strain SL1344) OX=216597 GN=gshA PE=3 SV=1	1	21	21	21	20	20	18	18	14	10	6	4	3	1	2	0	0	0	0	0	0	0	0	0	0	5	7	10	21	9	4	2	2	2	3	1	1	1	0	0	0	0	0	0
A0A0H3NGU6	A0A0H3NGU6	3	3	3	tr|A0A0H3NGU6|A0A0H3NGU6_SALTS Conserved membrane protein OS=Salmonella typhimurium (strain SL1344) OX=216597 GN=yhfK PE=4 SV=1	1	3	3	3	0	0	0	0	0	0	0	0	0	0	0	0	0	0	0	0	0	0	0	0	2	0	1	0	0	0	0	0	0	0	0	0	0	0	0	0	0	0	0	0
A0A0H3NGU9	A0A0H3NGU9	9	9	9	tr|A0A0H3NGU9|A0A0H3NGU9_SALTS Peptidyl-prolyl cis-trans isomerase OS=Salmonella typhimurium (strain SL1344) OX=216597 GN=ppiA PE=3 SV=1	1	9	9	9	9	8	7	5	4	4	4	3	1	1	2	1	1	0	0	0	0	0	0	0	0	5	7	6	8	5	4	5	5	4	4	4	2	2	1	1	1	0	0	0
A0A0H3NGV2	A0A0H3NGV2	5	5	5	tr|A0A0H3NGV2|A0A0H3NGV2_SALTS Uncharacterized protein OS=Salmonella typhimurium (strain SL1344) OX=216597 GN=yhfA PE=4 SV=1	1	5	5	5	4	4	4	4	4	2	2	1	1	0	0	0	0	0	0	0	0	0	0	0	0	0	3	3	5	2	2	2	0	0	0	0	0	0	0	0	0	0	0	0
A0A0H3NGV5	A0A0H3NGV5	20	20	20	tr|A0A0H3NGV5|A0A0H3NGV5_SALTS Siroheme synthase OS=Salmonella typhimurium (strain SL1344) OX=216597 GN=cysG PE=3 SV=1	1	20	20	20	4	11	11	12	7	7	4	3	1	1	1	1	0	0	0	0	0	0	0	0	0	3	1	1	14	3	2	3	1	1	2	1	1	1	1	1	0	0	0	0
A0A0H3NGV6	A0A0H3NGV6	2	2	2	tr|A0A0H3NGV6|A0A0H3NGV6_SALTS Cell filamentation protein Fic OS=Salmonella typhimurium (strain SL1344) OX=216597 GN=fic PE=4 SV=1	1	2	2	2	2	2	1	0	0	0	0	0	0	0	0	0	0	0	0	0	0	0	0	0	0	0	0	0	1	0	0	0	0	0	0	0	0	0	0	0	0	0	0	0
A0A0H3NGV7	A0A0H3NGV7	3	3	3	tr|A0A0H3NGV7|A0A0H3NGV7_SALTS PTS system, glucitol/sorbitol-specific IIBC component OS=Salmonella typhimurium (strain SL1344) OX=216597 GN=srlE PE=4 SV=1	1	3	3	3	0	0	0	0	0	0	0	0	0	0	0	0	0	0	0	0	0	0	0	0	3	0	0	0	0	0	0	0	0	0	0	0	0	0	0	0	0	0	0	0
A0A0H3NGW0	A0A0H3NGW0	3	3	3	tr|A0A0H3NGW0|A0A0H3NGW0_SALTS Nitrite reductase (NAD(P)H) small subunit OS=Salmonella typhimurium (strain SL1344) OX=216597 GN=nirD PE=4 SV=1	1	3	3	3	1	0	0	2	1	0	0	0	0	0	0	0	0	0	0	0	0	0	0	0	0	0	0	0	0	0	0	0	0	0	0	0	0	0	0	0	0	0	0	0
A0A0H3NGW1	A0A0H3NGW1	15	15	15	tr|A0A0H3NGW1|A0A0H3NGW1_SALTS Ribulose-phosphate 3-epimerase OS=Salmonella typhimurium (strain SL1344) OX=216597 GN=rpe PE=3 SV=1	1	15	15	15	1	8	10	10	9	6	5	3	1	1	1	2	1	1	1	0	0	0	0	0	0	3	1	2	7	6	7	6	5	1	0	0	0	0	0	0	0	0	0	0
A0A0H3NGW2	A0A0H3NGW2	17	17	17	tr|A0A0H3NGW2|A0A0H3NGW2_SALTS Arabinose 5-phosphate isomerase OS=Salmonella typhimurium (strain SL1344) OX=216597 GN=gutQ PE=3 SV=1	1	17	17	17	7	16	16	15	14	9	10	7	4	0	0	0	0	0	0	0	0	0	0	0	0	2	3	4	13	4	4	3	3	0	0	0	0	0	0	0	0	0	0	0
A0A0H3NGW4	A0A0H3NGW4	11	11	11	tr|A0A0H3NGW4|A0A0H3NGW4_SALTS Ribosomal-protein-serine acetyltransferase OS=Salmonella typhimurium (strain SL1344) OX=216597 GN=rimL PE=4 SV=1	1	11	11	11	11	10	7	2	2	2	1	0	0	0	0	0	0	0	0	0	0	0	0	0	0	1	1	1	4	1	0	0	0	0	0	0	0	0	0	0	0	0	0	0
A0A0H3NGW5	A0A0H3NGW5	20	20	20	tr|A0A0H3NGW5|A0A0H3NGW5_SALTS Tryptophan--tRNA ligase OS=Salmonella typhimurium (strain SL1344) OX=216597 GN=trpS PE=3 SV=1	1	20	20	20	13	17	18	17	15	12	12	9	5	5	4	0	2	0	0	0	0	0	0	0	0	2	6	8	16	7	6	6	6	5	3	3	2	1	1	0	0	0	0	0
A0A0H3NGW8	A0A0H3NGW8	20	20	20	tr|A0A0H3NGW8|A0A0H3NGW8_SALTS Threonine synthase OS=Salmonella typhimurium (strain SL1344) OX=216597 GN=thrC PE=4 SV=1	1	20	20	20	18	17	15	13	8	7	4	2	1	1	1	0	0	0	0	0	0	0	0	0	1	6	9	9	15	7	3	3	2	0	1	0	1	1	0	0	0	0	0	0
A0A0H3NGW9	A0A0H3NGW9	17	17	17	tr|A0A0H3NGW9|A0A0H3NGW9_SALTS 3-dehydroquinate synthase OS=Salmonella typhimurium (strain SL1344) OX=216597 GN=aroB PE=3 SV=1	1	17	17	17	13	14	13	13	12	10	6	7	3	1	0	0	0	0	0	0	0	0	0	0	1	4	7	9	14	9	7	5	4	3	3	2	1	1	0	0	1	0	0	0
A0A0H3NGX0	A0A0H3NGX0	2	2	2	tr|A0A0H3NGX0|A0A0H3NGX0_SALTS Hypothetical phosphotransferase enzyme OS=Salmonella typhimurium (strain SL1344) OX=216597 GN=SL1344_1546 PE=4 SV=1	1	2	2	2	2	2	1	1	1	1	1	0	0	0	0	0	0	0	0	0	0	0	0	0	0	0	0	0	0	0	0	0	0	0	0	0	0	0	0	0	0	0	0	0
A0A0H3NGX1	A0A0H3NGX1	2	2	2	tr|A0A0H3NGX1|A0A0H3NGX1_SALTS Penicillin-binding protein 1A OS=Salmonella typhimurium (strain SL1344) OX=216597 GN=mrcA PE=4 SV=1	1	2	2	2	0	0	0	0	0	0	0	0	0	0	0	0	0	0	0	0	0	0	0	0	0	0	0	0	0	0	0	0	0	0	0	0	0	0	0	0	0	0	0	0
A0A0H3NGX5	A0A0H3NGX5	2	2	2	tr|A0A0H3NGX5|A0A0H3NGX5_SALTS Hypothetical exported protein OS=Salmonella typhimurium (strain SL1344) OX=216597 GN=SL1344_1551 PE=3 SV=1	1	2	2	2	2	2	1	1	1	1	1	1	1	1	1	0	0	0	0	0	0	0	0	0	0	0	0	0	0	0	0	0	0	0	0	0	0	0	0	0	0	0	0	0
A0A0H3NGX7	A0A0H3NGX7	6	6	6	tr|A0A0H3NGX7|A0A0H3NGX7_SALTS Heat shock protein 15 OS=Salmonella typhimurium (strain SL1344) OX=216597 GN=hslR PE=3 SV=1	1	6	6	6	3	3	1	1	1	1	2	2	2	0	0	0	1	0	0	0	0	1	1	0	0	1	1	1	1	1	1	1	2	1	1	0	0	0	0	0	0	2	1	0
A0A0H3NGY0	A0A0H3NGY0	12	12	12	tr|A0A0H3NGY0|A0A0H3NGY0_SALTS Methyl-accepting chemotaxis protein III (Mcp-iii) (Ribose and galactose chemoreceptor protein) OS=Salmonella typhimurium (strain SL1344) OX=216597 GN=trg PE=4 SV=1	1	12	12	12	0	0	0	0	0	0	0	0	1	1	1	0	0	0	1	0	0	0	0	0	10	0	0	0	0	0	0	0	0	0	0	0	0	0	0	0	0	0	0	0
A0A0H3NGY1	A0A0H3NGY1	20	20	20	tr|A0A0H3NGY1|A0A0H3NGY1_SALTS Two-component response regulator OmpR OS=Salmonella typhimurium (strain SL1344) OX=216597 GN=ompR PE=4 SV=1	1	20	20	20	16	15	13	12	10	6	8	7	7	7	5	1	5	1	3	0	1	3	2	2	13	3	6	5	9	3	4	4	0	1	1	1	1	2	3	3	3	1	2	3
A0A0H3NGY2	A0A0H3NGY2	40	40	40	tr|A0A0H3NGY2|A0A0H3NGY2_SALTS Hypothetical transcription accessory protein OS=Salmonella typhimurium (strain SL1344) OX=216597 GN=yhgF PE=4 SV=1	1	40	40	40	30	32	31	30	27	20	20	13	11	7	6	0	0	0	0	0	0	0	0	0	5	6	5	8	25	7	6	5	5	4	2	2	1	1	0	1	1	1	1	0
A0A0H3NGY3	A0A0H3NGY3	10	10	10	tr|A0A0H3NGY3|A0A0H3NGY3_SALTS Hydrogenase isoenzymes formation protein HypE OS=Salmonella typhimurium (strain SL1344) OX=216597 GN=hypE PE=4 SV=1	1	10	10	10	6	7	7	4	3	4	6	3	2	0	0	0	0	0	0	0	0	0	0	0	0	2	1	2	6	1	1	1	1	1	1	0	0	0	0	0	0	0	0	0
A0A0H3NGY8	A0A0H3NGY8	7	7	7	tr|A0A0H3NGY8|A0A0H3NGY8_SALTS Pimeloyl-[acyl-carrier protein] methyl ester esterase OS=Salmonella typhimurium (strain SL1344) OX=216597 GN=bioH PE=3 SV=1	1	7	7	7	6	5	3	1	1	1	1	1	1	0	0	0	0	0	0	0	0	0	0	0	0	1	1	1	1	1	0	0	0	0	0	0	0	0	0	0	0	0	0	0
A0A0H3NGZ2	A0A0H3NGZ2	46	46	46	tr|A0A0H3NGZ2|A0A0H3NGZ2_SALTS Alpha-1,4 glucan phosphorylase OS=Salmonella typhimurium (strain SL1344) OX=216597 GN=malP PE=3 SV=1	1	46	46	46	0	0	19	31	38	36	32	32	20	15	10	3	1	1	1	0	0	0	0	0	0	3	0	0	9	5	12	12	14	10	7	5	5	3	3	1	1	1	0	0
A0A0H3NGZ3	A0A0H3NGZ3	3	3	3	tr|A0A0H3NGZ3|A0A0H3NGZ3_SALTS Type III secretion system apparatus OS=Salmonella typhimurium (strain SL1344) OX=216597 GN=prgJ PE=4 SV=1	1	3	3	3	1	0	0	0	0	0	0	0	0	0	0	0	0	0	0	0	0	2	1	1	2	0	1	0	0	0	0	0	0	0	0	0	1	1	1	1	1	1	1	1
A0A0H3NGZ5	A0A0H3NGZ5	30	30	30	tr|A0A0H3NGZ5|A0A0H3NGZ5_SALTS ATP-dependent helicase HrpA OS=Salmonella typhimurium (strain SL1344) OX=216597 GN=hrpA PE=4 SV=1	1	30	30	30	1	5	13	15	14	14	14	11	11	5	6	2	3	0	3	1	0	1	0	1	10	2	0	0	6	0	0	0	0	0	0	0	0	0	0	0	0	0	0	0
A0A0H3NGZ6	A0A0H3NGZ6	20	20	20	tr|A0A0H3NGZ6|A0A0H3NGZ6_SALTS Pathogenicity island 1 Type III secretion system apparatus-part of the Translocon OS=Salmonella typhimurium (strain SL1344) OX=216597 GN=sipD PE=4 SV=1	1	20	20	20	20	18	16	12	12	12	15	12	10	10	9	5	8	3	6	4	4	3	0	0	7	5	4	6	15	4	4	4	4	4	4	2	2	2	2	2	2	1	3	5
A0A0H3NGZ8	A0A0H3NGZ8	21	21	21	tr|A0A0H3NGZ8|A0A0H3NGZ8_SALTS Secretory apparatus ATP synthase (Associated with virulence) OS=Salmonella typhimurium (strain SL1344) OX=216597 GN=invC PE=4 SV=1	1	21	21	21	13	14	10	7	6	5	5	4	3	3	1	0	1	0	1	0	0	0	1	0	8	2	2	4	6	2	1	0	0	0	0	0	0	0	0	0	0	0	0	0
A0A0H3NH00	A0A0H3NH00	7	7	7	tr|A0A0H3NH00|A0A0H3NH00_SALTS AraC-family regulatory protein OS=Salmonella typhimurium (strain SL1344) OX=216597 GN=invF PE=4 SV=1	1	7	7	7	0	0	0	0	0	0	3	4	3	1	0	0	0	0	0	0	0	0	0	0	1	0	0	0	0	0	0	0	0	0	0	0	0	0	0	0	0	0	0	0
A0A0H3NH04	A0A0H3NH04	4	4	4	tr|A0A0H3NH04|A0A0H3NH04_SALTS Uncharacterized protein OS=Salmonella typhimurium (strain SL1344) OX=216597 GN=SL1344_3484 PE=4 SV=1	1	4	4	4	4	3	2	1	0	0	0	0	0	0	0	0	0	0	0	0	0	0	0	0	0	0	0	0	2	0	0	0	0	0	0	0	0	0	0	0	0	0	0	0
A0A0H3NH05	A0A0H3NH05	38	38	38	tr|A0A0H3NH05|A0A0H3NH05_SALTS Pyruvate-flavodoxin oxidoreductase OS=Salmonella typhimurium (strain SL1344) OX=216597 GN=nifJ PE=3 SV=1	1	38	38	38	0	1	5	26	30	23	17	6	5	4	1	1	1	0	0	0	0	0	0	0	0	1	0	0	0	6	6	6	6	2	2	0	0	0	0	0	0	0	0	0
A0A0H3NH06	A0A0H3NH06	1	1	1	tr|A0A0H3NH06|A0A0H3NH06_SALTS Salmonella pathogenicity island 1 protein OS=Salmonella typhimurium (strain SL1344) OX=216597 GN=SL1344_2884 PE=4 SV=1	1	1	1	1	1	1	1	0	0	1	1	1	1	1	0	0	0	0	0	0	0	0	0	0	0	0	1	0	0	0	0	0	0	0	0	0	1	1	0	0	0	0	0	0
A0A0H3NH07	A0A0H3NH07	2	2	2	tr|A0A0H3NH07|A0A0H3NH07_SALTS Rhomboid protease GlpG OS=Salmonella typhimurium (strain SL1344) OX=216597 GN=glpG PE=3 SV=1	1	2	2	2	0	0	0	0	0	0	0	0	0	0	0	0	0	0	0	0	0	0	0	0	2	0	0	0	0	0	0	0	0	0	0	0	0	0	0	0	0	0	0	0
A0A0H3NH08	A0A0H3NH08	6	6	6	tr|A0A0H3NH08|A0A0H3NH08_SALTS 30S ribosomal protein S20 OS=Salmonella typhimurium (strain SL1344) OX=216597 GN=rpsT PE=3 SV=1	1	6	6	6	0	0	0	1	2	3	4	4	4	5	5	5	5	4	6	4	6	6	5	4	4	4	0	0	0	0	2	3	3	4	4	4	5	5	4	5	5	4	4	5
A0A0H3NH09	A0A0H3NH09	59	59	59	tr|A0A0H3NH09|A0A0H3NH09_SALTS Glycerol-3-phosphate dehydrogenase OS=Salmonella typhimurium (strain SL1344) OX=216597 GN=glpD PE=3 SV=1	1	59	59	59	26	37	44	50	50	49	49	48	47	46	46	30	42	28	36	23	26	37	31	17	37	24	5	15	45	28	27	28	31	30	28	27	29	27	24	21	22	22	23	34
A0A0H3NH10	A0A0H3NH10	1	1	1	tr|A0A0H3NH10|A0A0H3NH10_SALTS Conserved hypotheticalprotein OS=Salmonella typhimurium (strain SL1344) OX=216597 GN=SL1344_2889 PE=4 SV=1	1	1	1	1	1	1	0	0	0	0	0	0	0	0	0	0	0	0	0	0	0	0	0	0	0	0	0	0	0	0	0	0	0	0	0	0	0	0	0	0	0	0	0	0
A0A0H3NH13	A0A0H3NH13	10	10	10	tr|A0A0H3NH13|A0A0H3NH13_SALTS Hypothetical dehydratase OS=Salmonella typhimurium (strain SL1344) OX=216597 GN=SL1344_3498 PE=3 SV=1	1	10	10	10	0	0	0	4	5	3	4	0	0	0	0	0	0	0	0	0	0	1	1	1	1	0	0	0	0	1	1	1	1	1	0	0	0	0	0	0	0	0	0	0
A0A0H3NH14	A0A0H3NH14	7	7	7	tr|A0A0H3NH14|A0A0H3NH14_SALTS Peptidyl-prolyl cis-trans isomerase OS=Salmonella typhimurium (strain SL1344) OX=216597 GN=fkpB PE=3 SV=1	1	7	7	7	7	5	4	3	2	1	1	1	1	1	1	1	0	0	0	0	0	0	0	0	0	0	3	2	2	2	0	0	0	0	0	0	0	0	0	0	0	0	0	0
A0A0H3NH15	A0A0H3NH15	45	45	45	tr|A0A0H3NH15|A0A0H3NH15_SALTS Alpha-1,4 glucan phosphorylase OS=Salmonella typhimurium (strain SL1344) OX=216597 GN=glgP PE=3 SV=1	1	45	45	45	0	1	24	39	36	28	17	14	5	3	2	0	0	0	0	0	0	0	0	0	0	4	0	1	22	18	14	8	5	2	1	1	0	0	0	0	0	0	0	0
A0A0H3NH16	A0A0H3NH16	16	16	16	tr|A0A0H3NH16|A0A0H3NH16_SALTS Uncharacterized protein OS=Salmonella typhimurium (strain SL1344) OX=216597 GN=ydaA PE=4 SV=1	1	16	16	16	12	12	8	7	7	3	2	1	1	0	0	1	1	1	1	0	0	0	0	1	1	5	8	8	7	5	4	4	1	2	0	0	0	0	1	0	0	0	0	0
A0A0H3NH18	A0A0H3NH18	23	23	23	tr|A0A0H3NH18|A0A0H3NH18_SALTS Glucose-1-phosphate adenylyltransferase OS=Salmonella typhimurium (strain SL1344) OX=216597 GN=glgC PE=3 SV=1	1	23	23	23	1	9	16	16	12	9	8	5	2	2	2	0	0	0	0	0	0	0	0	0	1	6	0	6	20	12	10	6	1	0	0	0	0	0	0	0	0	0	0	0
A0A0H3NH20	A0A0H3NH20	20	20	20	tr|A0A0H3NH20|A0A0H3NH20_SALTS Aspartate-semialdehyde dehydrogenase OS=Salmonella typhimurium (strain SL1344) OX=216597 GN=asd PE=3 SV=1	1	20	20	20	15	19	19	17	18	14	12	11	9	8	7	1	2	0	0	0	0	0	0	0	0	5	5	9	17	10	10	9	6	2	2	2	1	3	2	1	1	0	0	0
A0A0H3NH21	A0A0H3NH21	5	5	5	tr|A0A0H3NH21|A0A0H3NH21_SALTS Gluconokinase OS=Salmonella typhimurium (strain SL1344) OX=216597 GN=gntK PE=3 SV=1	1	5	5	5	4	2	1	0	0	0	0	0	0	0	0	0	0	0	0	0	0	0	0	0	0	1	1	1	0	0	0	0	0	0	0	0	0	0	0	0	0	0	0	0
A0A0H3NH23	A0A0H3NH23	2	2	2	tr|A0A0H3NH23|A0A0H3NH23_SALTS Hypothetical regulatory protein OS=Salmonella typhimurium (strain SL1344) OX=216597 GN=SL1344_2899 PE=4 SV=1	1	2	2	2	2	2	1	0	0	0	0	0	0	0	0	0	0	0	0	0	0	0	0	0	0	0	1	0	0	0	0	0	0	0	0	0	0	0	0	0	0	0	0	0
A0A0H3NH24	A0A0H3NH24	16	16	16	tr|A0A0H3NH24|A0A0H3NH24_SALTS Hypothetical oxidoreductase OS=Salmonella typhimurium (strain SL1344) OX=216597 GN=yhhX PE=4 SV=1	1	16	16	16	8	10	9	9	7	3	3	1	1	0	0	0	0	0	0	0	0	0	0	0	0	2	4	4	7	5	4	3	3	1	2	0	0	0	0	0	0	0	0	0
A0A0H3NH28	A0A0H3NH28	3	3	3	tr|A0A0H3NH28|A0A0H3NH28_SALTS Puative phophotriesterase OS=Salmonella typhimurium (strain SL1344) OX=216597 GN=SL1344_3516 PE=3 SV=1	1	3	3	3	1	2	0	0	0	0	0	0	0	0	0	0	0	0	0	0	0	0	0	0	0	0	0	0	1	0	0	0	0	1	1	0	0	0	0	0	0	0	0	0
A0A0H3NH29	A0A0H3NH29	10	10	10	tr|A0A0H3NH29|A0A0H3NH29_SALTS 4-hydroxy-tetrahydrodipicolinate reductase OS=Salmonella typhimurium (strain SL1344) OX=216597 GN=dapB PE=3 SV=1	1	10	10	10	1	5	6	7	6	5	3	3	1	1	1	0	0	0	0	0	0	0	0	0	0	1	1	1	7	1	1	1	1	0	0	0	0	0	0	0	0	0	0	0
A0A0H3NH30	A0A0H3NH30	3	3	3	tr|A0A0H3NH30|A0A0H3NH30_SALTS Uncharacterized protein OS=Salmonella typhimurium (strain SL1344) OX=216597 GN=yhhA PE=4 SV=1	1	3	3	3	3	3	1	1	0	1	1	0	0	0	0	0	0	0	0	0	0	0	0	0	0	0	0	0	3	0	0	0	0	0	0	0	0	0	0	0	0	0	0	0
A0A0H3NH31	A0A0H3NH31	4	4	4	tr|A0A0H3NH31|A0A0H3NH31_SALTS Lipoprotein NlpD OS=Salmonella typhimurium (strain SL1344) OX=216597 GN=nlpD PE=4 SV=1	1	4	4	4	2	2	1	1	1	1	0	0	1	0	0	0	1	0	0	0	0	0	0	0	1	0	0	0	0	0	0	0	0	0	0	0	0	0	0	0	0	0	0	0
A0A0H3NH34	A0A0H3NH34	31	31	31	tr|A0A0H3NH34|A0A0H3NH34_SALTS Glycerol-3-phosphate-binding periplasmic protein (Fragment) OS=Salmonella typhimurium (strain SL1344) OX=216597 GN=ugpB PE=4 SV=1	1	31	31	31	25	27	22	17	18	12	13	7	4	3	3	3	3	2	2	2	0	0	0	0	0	1	8	7	22	6	3	2	2	1	0	0	0	0	0	0	0	0	0	0
A0A0H3NH35	A0A0H3NH35	2	2	2	tr|A0A0H3NH35|A0A0H3NH35_SALTS Carnitinyl-CoA dehydratase OS=Salmonella typhimurium (strain SL1344) OX=216597 GN=caiD PE=3 SV=1	1	2	2	2	0	1	2	0	0	0	0	0	0	0	0	0	0	0	0	0	0	0	0	0	0	0	0	0	0	0	0	0	0	0	0	0	0	0	0	0	0	0	0	0
A0A0H3NH37	A0A0H3NH37	13	13	13	tr|A0A0H3NH37|A0A0H3NH37_SALTS 2-C-methyl-D-erythritol 4-phosphate cytidylyltransferase OS=Salmonella typhimurium (strain SL1344) OX=216597 GN=ispD PE=3 SV=1	1	13	13	13	10	9	8	5	3	2	1	0	0	0	0	1	0	0	0	0	0	0	0	0	0	3	6	3	6	2	2	2	2	1	1	0	0	1	0	0	0	0	0	0
A0A0H3NH38	A0A0H3NH38	28	28	28	tr|A0A0H3NH38|A0A0H3NH38_SALTS Transcriptional regulatory protein TyrR OS=Salmonella typhimurium (strain SL1344) OX=216597 GN=tyrR PE=4 SV=1	1	28	28	28	3	21	18	18	18	14	11	7	5	2	1	0	0	0	0	0	0	0	0	0	0	2	1	4	15	5	5	2	2	1	1	0	0	0	0	0	0	0	0	0
A0A0H3NH40	A0A0H3NH40	8	8	8	tr|A0A0H3NH40|A0A0H3NH40_SALTS PanD regulatory factor OS=Salmonella typhimurium (strain SL1344) OX=216597 GN=yhhK PE=3 SV=1	1	8	8	8	8	6	3	2	1	0	0	0	0	0	0	0	0	0	0	0	0	0	0	0	0	1	3	3	2	1	1	1	1	0	0	0	0	0	0	0	0	0	0	0
A0A0H3NH41	A0A0H3NH41	1	1	1	tr|A0A0H3NH41|A0A0H3NH41_SALTS Protein FixB OS=Salmonella typhimurium (strain SL1344) OX=216597 GN=fixB PE=3 SV=1	1	1	1	1	0	1	0	0	0	0	0	0	0	0	0	0	0	0	0	0	0	0	0	0	0	0	0	0	0	0	0	0	0	0	0	0	0	0	0	0	0	0	0	0
A0A0H3NH42	A0A0H3NH42	4	4	4	tr|A0A0H3NH42|A0A0H3NH42_SALTS RNA polymerase sigma factor RpoH OS=Salmonella typhimurium (strain SL1344) OX=216597 GN=rpoH PE=3 SV=1	1	4	4	4	0	0	0	0	0	2	3	3	4	2	3	1	1	0	0	0	0	0	0	0	0	0	0	0	0	0	0	0	0	0	0	0	0	0	0	0	0	0	0	0
A0A0H3NH43	A0A0H3NH43	24	24	24	tr|A0A0H3NH43|A0A0H3NH43_SALTS Signal recognition particle receptor FtsY OS=Salmonella typhimurium (strain SL1344) OX=216597 GN=ftsY PE=3 SV=1	1	24	24	24	20	17	13	9	10	6	5	4	5	6	6	6	3	3	3	2	1	4	2	1	9	7	10	7	10	2	2	1	2	2	3	2	3	3	3	3	2	2	1	3
A0A0H3NH46	A0A0H3NH46	11	11	11	tr|A0A0H3NH46|A0A0H3NH46_SALTS Heavy metal-transporting ATPase OS=Salmonella typhimurium (strain SL1344) OX=216597 GN=zntA PE=3 SV=1	1	11	11	11	0	0	0	0	0	0	0	0	0	0	0	0	0	0	0	0	0	0	0	0	7	0	0	0	0	0	0	0	0	0	0	0	0	0	0	0	0	0	0	0
A0A0H3NH47	A0A0H3NH47	11	11	11	tr|A0A0H3NH47|A0A0H3NH47_SALTS Dihydrofolate reductase OS=Salmonella typhimurium (strain SL1344) OX=216597 GN=folA PE=3 SV=1	1	11	11	11	9	9	6	4	2	0	0	0	0	0	0	0	0	0	0	0	0	0	0	0	0	1	3	4	4	0	1	1	1	0	0	0	0	0	0	0	0	0	0	0
A0A0H3NH48	A0A0H3NH48	3	3	3	tr|A0A0H3NH48|A0A0H3NH48_SALTS Sulfur carrier protein TusA OS=Salmonella typhimurium (strain SL1344) OX=216597 GN=yhhP PE=3 SV=1	1	3	3	3	3	3	3	0	0	0	0	0	0	0	0	0	0	0	0	0	0	0	0	0	0	0	1	1	2	0	0	0	0	0	0	0	0	0	0	0	0	0	0	0
A0A0H3NH51	A0A0H3NH51	30	30	30	tr|A0A0H3NH51|A0A0H3NH51_SALTS Chaperone SurA OS=Salmonella typhimurium (strain SL1344) OX=216597 GN=surA PE=3 SV=1	1	30	30	30	30	29	26	20	20	17	21	15	13	10	9	3	4	2	1	0	0	0	0	0	0	8	14	15	25	11	6	6	3	3	2	2	1	1	1	0	0	0	0	0
A0A0H3NH52	A0A0H3NH52	2	2	2	tr|A0A0H3NH52|A0A0H3NH52_SALTS Bacteriophage shock protein C OS=Salmonella typhimurium (strain SL1344) OX=216597 GN=pspC PE=4 SV=1	1	2	2	2	0	0	0	0	0	0	0	0	0	0	0	0	0	0	0	0	1	1	1	0	0	0	0	0	0	0	0	0	0	0	0	1	0	0	0	0	0	0	0	1
A0A0H3NH53	A0A0H3NH53	11	11	11	tr|A0A0H3NH53|A0A0H3NH53_SALTS Sulfate adenylyltransferase subunit 2 OS=Salmonella typhimurium (strain SL1344) OX=216597 GN=cysD PE=3 SV=1	1	11	11	11	1	4	6	7	10	8	9	6	4	3	3	0	0	0	0	0	0	0	0	0	0	2	1	1	3	1	3	3	3	1	1	0	1	0	0	0	0	0	0	0
A0A0H3NH55	A0A0H3NH55	8	8	8	tr|A0A0H3NH55|A0A0H3NH55_SALTS Hypothetical exported protein OS=Salmonella typhimurium (strain SL1344) OX=216597 GN=yhiN PE=4 SV=1	1	8	8	8	7	7	5	2	1	0	1	0	0	0	0	0	0	0	0	0	0	0	0	0	0	0	1	1	1	0	0	0	0	0	0	0	0	0	0	0	0	0	0	0
A0A0H3NH58	A0A0H3NH58	3	3	3	tr|A0A0H3NH58|A0A0H3NH58_SALTS Uncharacterized protein OS=Salmonella typhimurium (strain SL1344) OX=216597 GN=SL1344_2919 PE=4 SV=1	1	3	3	3	0	0	0	0	1	1	1	0	0	0	0	0	0	0	0	0	0	0	0	0	0	1	0	0	0	0	0	1	1	0	0	0	0	0	0	0	0	0	0	0
A0A0H3NH59	A0A0H3NH59	11	11	11	tr|A0A0H3NH59|A0A0H3NH59_SALTS Universal stress protein OS=Salmonella typhimurium (strain SL1344) OX=216597 GN=uspA PE=3 SV=1	1	11	11	11	9	8	6	7	6	6	3	3	3	2	2	1	2	1	1	1	1	1	1	2	3	6	8	9	8	8	7	8	6	5	4	4	4	2	1	1	1	2	1	1
A0A0H3NH60	A0A0H3NH60	7	7	7	tr|A0A0H3NH60|A0A0H3NH60_SALTS Ribosomal RNA small subunit methyltransferase J OS=Salmonella typhimurium (strain SL1344) OX=216597 GN=yhiQ PE=3 SV=1	1	7	7	7	7	2	3	1	1	1	0	0	0	0	0	0	0	0	0	0	0	0	0	0	0	0	0	0	1	0	0	0	0	0	0	0	0	0	0	0	0	0	0	0
A0A0H3NH63	A0A0H3NH63	17	17	17	tr|A0A0H3NH63|A0A0H3NH63_SALTS Ribosomal RNA large subunit methyltransferase J OS=Salmonella typhimurium (strain SL1344) OX=216597 GN=yhiR PE=3 SV=1	1	17	17	17	15	15	11	9	6	4	0	0	0	0	0	0	0	0	0	0	0	0	0	0	0	3	8	7	10	4	2	1	0	1	1	0	0	0	0	0	0	0	0	0
A0A0H3NH64	A0A0H3NH64	16	16	16	tr|A0A0H3NH64|A0A0H3NH64_SALTS Type III secretion system effector protein-involved in bacterial invasion, also promotes secretion or accumulation of fluid OS=Salmonella typhimurium (strain SL1344) OX=216597 GN=sopD PE=4 SV=1	1	16	16	16	13	10	6	4	3	1	2	0	0	0	0	0	0	0	0	0	0	0	0	0	0	1	6	3	2	1	0	0	0	0	0	0	0	0	0	0	0	0	0	0
A0A0H3NH65	A0A0H3NH65	16	16	16	tr|A0A0H3NH65|A0A0H3NH65_SALTS L-asparginase OS=Salmonella typhimurium (strain SL1344) OX=216597 GN=SL1344_3563 PE=3 SV=1	1	16	16	16	1	10	12	12	11	12	8	5	5	1	1	0	0	0	0	0	0	0	0	0	0	3	0	2	12	8	8	5	5	2	1	1	0	0	0	0	0	0	0	0
A0A0H3NH66	A0A0H3NH66	17	17	17	tr|A0A0H3NH66|A0A0H3NH66_SALTS Hypothetical phosphosugar-binding protein OS=Salmonella typhimurium (strain SL1344) OX=216597 GN=SL1344_3566 PE=4 SV=1	1	17	17	17	7	10	13	14	15	13	13	12	10	9	8	4	6	2	1	1	1	0	0	0	0	2	2	3	10	6	7	7	8	7	6	6	6	3	3	2	2	1	0	0
A0A0H3NH67	A0A0H3NH67	11	11	11	tr|A0A0H3NH67|A0A0H3NH67_SALTS Thiamine-binding periplasmic protein OS=Salmonella typhimurium (strain SL1344) OX=216597 GN=tbpA PE=4 SV=1	1	11	11	11	9	9	7	4	3	3	2	0	0	0	0	0	0	0	0	0	0	0	0	0	0	2	5	5	6	3	2	2	1	0	1	1	0	0	0	0	0	0	0	0
A0A0H3NH69	A0A0H3NH69	31	31	31	tr|A0A0H3NH69|A0A0H3NH69_SALTS Exoribonuclease 2 OS=Salmonella typhimurium (strain SL1344) OX=216597 GN=rnb PE=3 SV=1	1	31	31	31	22	27	23	22	23	16	17	11	2	1	1	0	0	0	0	0	0	0	0	0	0	7	10	15	23	11	7	6	4	2	1	1	1	0	0	0	0	0	0	0
A0A0H3NH71	A0A0H3NH71	2	2	2	tr|A0A0H3NH71|A0A0H3NH71_SALTS Uncharacterized protein OS=Salmonella typhimurium (strain SL1344) OX=216597 GN=SL1344_2929 PE=4 SV=1	1	2	2	2	0	0	0	0	0	0	2	2	2	1	1	0	0	0	0	0	0	0	0	0	0	0	0	0	0	0	0	0	0	1	1	1	1	0	0	0	0	0	0	0
A0A0H3NH73	A0A0H3NH73	11	11	11	tr|A0A0H3NH73|A0A0H3NH73_SALTS Uncharacterized protein OS=Salmonella typhimurium (strain SL1344) OX=216597 GN=yhjH PE=4 SV=1	1	11	11	11	5	5	2	1	1	1	6	8	8	8	3	2	3	1	0	1	0	0	0	0	2	0	0	1	3	0	0	0	1	2	3	0	1	1	1	0	0	0	0	0
A0A0H3NH74	A0A0H3NH74	4	4	4	tr|A0A0H3NH74|A0A0H3NH74_SALTS 2-isopropylmalate synthase OS=Salmonella typhimurium (strain SL1344) OX=216597 GN=leuA PE=3 SV=1	1	4	4	4	0	0	3	1	1	1	0	0	0	0	0	0	0	0	0	0	0	0	0	0	0	0	0	1	3	2	2	1	0	0	0	0	0	0	0	0	0	0	0	0
A0A0H3NH75	A0A0H3NH75	21	21	21	tr|A0A0H3NH75|A0A0H3NH75_SALTS Hypothetical zinc-protease OS=Salmonella typhimurium (strain SL1344) OX=216597 GN=yhjJ PE=4 SV=1	1	21	21	21	17	16	12	9	5	5	4	1	2	0	1	0	0	0	0	0	0	0	0	0	0	3	5	5	13	5	3	1	1	0	0	0	0	0	0	0	0	0	0	0
A0A0H3NH76	A0A0H3NH76	3	3	3	tr|A0A0H3NH76|A0A0H3NH76_SALTS Hypothetical translation initiaiton factor OS=Salmonella typhimurium (strain SL1344) OX=216597 GN=yciH PE=4 SV=1	1	3	3	3	3	3	1	0	0	0	0	0	0	0	0	0	0	0	0	0	0	0	0	0	0	0	0	0	0	0	0	0	0	0	0	0	0	0	0	0	0	0	0	0
A0A0H3NH78	A0A0H3NH78	3	3	3	tr|A0A0H3NH78|A0A0H3NH78_SALTS Hypothetical polysaccharide biosynthesis protein subunit C OS=Salmonella typhimurium (strain SL1344) OX=216597 GN=yhjL PE=4 SV=1	1	3	3	3	0	0	0	0	1	1	1	0	1	1	1	0	0	0	0	1	0	1	0	0	0	0	0	1	1	0	0	0	0	0	0	0	0	0	0	0	0	0	0	0
A0A0H3NH79	A0A0H3NH79	13	13	13	tr|A0A0H3NH79|A0A0H3NH79_SALTS Cyclic di-GMP-binding protein OS=Salmonella typhimurium (strain SL1344) OX=216597 GN=yhjN PE=3 SV=1	1	13	13	13	0	0	0	0	0	0	0	0	0	0	0	0	0	0	0	0	0	0	0	0	9	0	0	0	1	0	0	0	0	0	0	0	0	0	0	0	0	0	0	0
A0A0H3NH80	A0A0H3NH80	13	13	13	tr|A0A0H3NH80|A0A0H3NH80_SALTS Fructose repressor OS=Salmonella typhimurium (strain SL1344) OX=216597 GN=fruR PE=4 SV=1	1	13	13	13	6	8	7	4	5	2	4	6	6	3	1	1	0	0	0	0	0	1	0	0	5	2	2	2	6	2	0	0	0	0	0	0	0	0	0	0	0	0	0	0
A0A0H3NH82	A0A0H3NH82	13	13	13	tr|A0A0H3NH82|A0A0H3NH82_SALTS GTP cyclohydrolase-2 OS=Salmonella typhimurium (strain SL1344) OX=216597 GN=ribA PE=3 SV=1	1	13	13	13	11	11	9	8	6	3	1	0	0	0	0	0	0	0	0	0	0	0	0	0	0	2	5	5	10	4	3	3	1	1	1	0	0	0	0	0	0	0	0	0
A0A0H3NH87	A0A0H3NH87	23	23	23	tr|A0A0H3NH87|A0A0H3NH87_SALTS UDP-N-acetylmuramoyl-L-alanyl-D-glutamate--2,6-diaminopimelate ligase OS=Salmonella typhimurium (strain SL1344) OX=216597 GN=murE PE=3 SV=1	1	23	23	23	18	19	16	12	8	3	4	1	1	1	1	0	0	0	0	0	0	0	0	0	0	2	4	7	15	5	4	1	1	0	0	0	0	0	0	0	0	0	0	0
A0A0H3NH89	A0A0H3NH89	6	6	6	tr|A0A0H3NH89|A0A0H3NH89_SALTS Hypothetical protease OS=Salmonella typhimurium (strain SL1344) OX=216597 GN=sohB PE=4 SV=1	1	6	6	6	0	0	0	0	0	0	0	0	0	0	0	0	0	0	0	0	0	0	0	0	3	0	0	0	0	0	0	0	0	0	0	0	0	0	0	0	0	0	0	0
A0A0H3NH91	A0A0H3NH91	5	5	5	tr|A0A0H3NH91|A0A0H3NH91_SALTS Uncharacterized protein OS=Salmonella typhimurium (strain SL1344) OX=216597 GN=SL1344_2944 PE=4 SV=1	1	5	5	5	5	5	5	5	4	3	2	2	2	1	1	0	0	0	0	0	0	0	0	0	0	2	4	4	5	2	1	1	1	1	1	1	1	1	1	0	1	0	0	0
A0A0H3NH93	A0A0H3NH93	8	8	8	tr|A0A0H3NH93|A0A0H3NH93_SALTS Hypothetical acetyltransferase OS=Salmonella typhimurium (strain SL1344) OX=216597 GN=yiaC PE=4 SV=1	1	8	8	8	8	8	5	3	1	1	1	1	0	0	0	0	0	0	0	0	0	0	0	0	0	2	4	3	5	2	2	0	0	0	0	0	0	0	0	0	0	0	0	0
A0A0H3NH94	A0A0H3NH94	13	13	13	tr|A0A0H3NH94|A0A0H3NH94_SALTS UDP-N-acetylglucosamine--N-acetylmuramyl-(pentapeptide) pyrophosphoryl-undecaprenol N-acetylglucosamine transferase OS=Salmonella typhimurium (strain SL1344) OX=216597 GN=murG PE=3 SV=1	1	13	13	13	0	0	2	5	6	6	6	6	8	5	9	1	4	2	4	3	3	3	1	1	8	1	0	0	1	0	0	1	2	2	2	1	1	1	0	0	0	0	0	2
A0A0H3NH96	A0A0H3NH96	32	32	32	tr|A0A0H3NH96|A0A0H3NH96_SALTS Uncharacterized protein OS=Salmonella typhimurium (strain SL1344) OX=216597 GN=ygdH PE=4 SV=1	1	32	32	32	1	17	27	27	26	21	20	13	10	7	6	1	1	0	0	0	0	0	0	0	1	5	0	7	29	15	10	8	6	2	0	0	0	1	0	0	0	0	0	0
A0A0H3NH98	A0A0H3NH98	33	33	33	tr|A0A0H3NH98|A0A0H3NH98_SALTS Cell division protein FtsZ OS=Salmonella typhimurium (strain SL1344) OX=216597 GN=ftsZ PE=3 SV=1	1	33	33	33	25	23	19	20	15	14	16	18	18	15	16	15	16	13	12	11	7	14	7	5	22	11	10	10	19	7	7	7	8	8	8	7	5	10	11	7	5	6	6	9
A0A0H3NH99	A0A0H3NH99	11	11	11	tr|A0A0H3NH99|A0A0H3NH99_SALTS Tryptophan synthase alpha chain OS=Salmonella typhimurium (strain SL1344) OX=216597 GN=trpA PE=3 SV=1	1	11	11	11	8	9	4	3	2	1	1	0	0	1	1	1	1	1	0	0	0	0	0	0	0	1	3	4	3	1	0	0	0	0	0	0	0	0	0	0	0	0	0	0
A0A0H3NHA0	A0A0H3NHA0	3	3	3	tr|A0A0H3NHA0|A0A0H3NHA0_SALTS Hypothetical acetyltransferase OS=Salmonella typhimurium (strain SL1344) OX=216597 GN=yafP PE=4 SV=1	1	3	3	3	2	2	1	1	0	0	0	0	0	0	0	0	0	0	0	0	0	1	0	0	0	0	0	0	0	0	0	0	0	0	0	0	0	0	0	0	0	0	0	0
A0A0H3NHA2	A0A0H3NHA2	3	3	3	tr|A0A0H3NHA2|A0A0H3NHA2_SALTS L-fuculose phosphate aldolase OS=Salmonella typhimurium (strain SL1344) OX=216597 GN=fucA PE=3 SV=1	1	3	3	3	0	1	1	1	1	0	0	0	0	0	0	0	0	0	0	0	0	0	0	0	0	0	0	2	3	2	1	1	0	0	0	0	0	0	0	0	0	0	0	0
A0A0H3NHA4	A0A0H3NHA4	8	8	8	tr|A0A0H3NHA4|A0A0H3NHA4_SALTS DNA gyrase inhibitor YacG OS=Salmonella typhimurium (strain SL1344) OX=216597 GN=yacG PE=3 SV=1	1	8	8	8	8	5	4	3	3	3	3	1	1	0	0	0	0	0	0	0	0	0	0	0	0	0	3	3	5	1	1	0	0	0	0	0	0	0	0	0	0	0	0	0
A0A0H3NHA5	A0A0H3NHA5	6	6	6	tr|A0A0H3NHA5|A0A0H3NHA5_SALTS Hypothetical outer membrane protein OS=Salmonella typhimurium (strain SL1344) OX=216597 GN=ompW PE=4 SV=1	1	6	6	6	0	0	1	2	2	1	1	1	1	1	1	0	1	0	1	0	1	1	1	0	4	0	0	0	0	0	0	0	0	0	0	0	0	0	0	0	0	0	0	1
A0A0H3NHA7	A0A0H3NHA7	5	5	5	tr|A0A0H3NHA7|A0A0H3NHA7_SALTS L-fucose operon activator OS=Salmonella typhimurium (strain SL1344) OX=216597 GN=fucR PE=4 SV=1	1	5	5	5	1	3	2	1	3	2	4	3	4	1	1	0	1	1	1	1	0	0	0	0	4	1	0	0	1	1	1	1	1	0	0	0	0	0	0	0	0	0	0	0
A0A0H3NHB2	A0A0H3NHB2	2	2	2	tr|A0A0H3NHB2|A0A0H3NHB2_SALTS Hypothetical outer membrane protein OS=Salmonella typhimurium (strain SL1344) OX=216597 GN=yiaD PE=3 SV=1	1	2	2	2	0	0	0	0	0	0	0	0	0	0	1	0	1	0	1	0	0	0	0	0	1	0	0	0	0	0	0	0	0	0	0	0	0	0	0	0	0	0	0	0
A0A0H3NHB3	A0A0H3NHB3	6	6	6	tr|A0A0H3NHB3|A0A0H3NHB3_SALTS Uncharacterized protein OS=Salmonella typhimurium (strain SL1344) OX=216597 GN=SL1344_3616 PE=4 SV=1	1	6	6	6	4	4	3	2	0	0	0	0	0	0	0	0	0	0	0	0	0	0	0	0	0	0	3	2	3	1	0	0	0	0	1	1	0	0	0	0	0	0	0	0
A0A0H3NHB4	A0A0H3NHB4	7	7	7	tr|A0A0H3NHB4|A0A0H3NHB4_SALTS Possible aminotransferase OS=Salmonella typhimurium (strain SL1344) OX=216597 GN=csdA PE=3 SV=1	1	7	7	7	0	3	4	2	1	0	0	0	0	0	0	0	0	0	0	0	0	0	0	0	0	1	1	1	1	2	2	1	1	0	0	0	0	0	0	0	0	0	0	0
A0A0H3NHB5	A0A0H3NHB5	8	8	8	tr|A0A0H3NHB5|A0A0H3NHB5_SALTS Uncharacterized protein OS=Salmonella typhimurium (strain SL1344) OX=216597 GN=SL1344_3644 PE=4 SV=1	1	8	8	8	0	3	5	2	3	1	1	2	1	1	1	1	1	0	0	0	0	0	0	0	0	0	0	0	1	0	0	0	0	0	0	0	0	0	0	0	0	0	0	0
A0A0H3NHB7	A0A0H3NHB7	18	18	18	tr|A0A0H3NHB7|A0A0H3NHB7_SALTS Glycine--tRNA ligase alpha subunit OS=Salmonella typhimurium (strain SL1344) OX=216597 GN=glyQ PE=3 SV=1	1	18	18	18	6	8	13	13	11	8	10	9	9	5	4	1	2	0	0	0	0	0	0	0	0	3	1	4	16	7	6	9	5	4	1	0	0	1	1	1	0	0	0	0
A0A0H3NHB8	A0A0H3NHB8	6	6	6	tr|A0A0H3NHB8|A0A0H3NHB8_SALTS Oligopeptide transport ATP-binding protein (OppF) OS=Salmonella typhimurium (strain SL1344) OX=216597 GN=oppF PE=3 SV=1	1	6	6	6	0	0	0	0	0	0	0	1	0	0	0	0	0	1	1	1	0	0	0	0	5	0	0	0	0	0	0	0	0	0	0	0	0	0	0	0	0	0	0	0
A0A0H3NHB9	A0A0H3NHB9	13	13	13	tr|A0A0H3NHB9|A0A0H3NHB9_SALTS Hypothetical glutathione transferase OS=Salmonella typhimurium (strain SL1344) OX=216597 GN=yibF PE=4 SV=1	1	13	13	13	11	11	11	9	5	4	4	2	0	0	0	0	0	0	0	0	0	0	0	0	0	1	1	2	9	3	1	1	1	0	0	0	0	0	0	0	0	0	0	0
A0A0H3NHC0	A0A0H3NHC0	13	13	13	tr|A0A0H3NHC0|A0A0H3NHC0_SALTS Xylose isomerase OS=Salmonella typhimurium (strain SL1344) OX=216597 GN=xylA PE=3 SV=1	1	13	13	13	0	0	5	8	10	4	6	1	1	1	0	0	0	0	0	0	0	0	0	0	0	0	0	0	2	2	2	2	1	0	0	0	0	0	0	0	0	0	0	0
A0A0H3NHC1	A0A0H3NHC1	9	9	9	tr|A0A0H3NHC1|A0A0H3NHC1_SALTS Uncharacterized protein OS=Salmonella typhimurium (strain SL1344) OX=216597 GN=yibL PE=4 SV=1	1	9	9	9	8	7	4	4	4	4	4	3	2	1	1	0	2	1	1	0	0	0	0	0	0	2	3	3	5	0	0	0	0	0	0	0	0	0	0	0	0	0	0	0
A0A0H3NHC3	A0A0H3NHC3	9	9	9	tr|A0A0H3NHC3|A0A0H3NHC3_SALTS N-acetylmuramoyl-L-alanine amidase OS=Salmonella typhimurium (strain SL1344) OX=216597 GN=amiC PE=4 SV=1	1	9	9	9	7	6	4	2	1	0	0	0	0	0	0	0	0	0	0	0	0	0	0	0	0	1	1	1	1	0	0	0	0	0	0	0	0	0	0	0	0	0	0	0
A0A0H3NHC4	A0A0H3NHC4	1	1	1	tr|A0A0H3NHC4|A0A0H3NHC4_SALTS Hypothetical electron-transport protein OS=Salmonella typhimurium (strain SL1344) OX=216597 GN=ysaA PE=4 SV=1	1	1	1	1	1	1	0	0	0	0	0	0	0	0	0	0	0	0	0	0	0	0	0	0	0	0	0	0	0	0	0	0	0	0	0	0	0	0	0	0	0	0	0	0
A0A0H3NHC6	A0A0H3NHC6	19	19	19	tr|A0A0H3NHC6|A0A0H3NHC6_SALTS L-lactate dehydrogenase OS=Salmonella typhimurium (strain SL1344) OX=216597 GN=lctD PE=3 SV=1	1	19	19	19	2	3	2	5	7	8	11	12	11	9	8	1	1	1	1	1	1	1	1	2	17	3	0	1	1	0	0	1	2	1	2	1	1	0	0	0	0	0	1	3
A0A0H3NHC8	A0A0H3NHC8	15	15	15	tr|A0A0H3NHC8|A0A0H3NHC8_SALTS Uncharacterized protein OS=Salmonella typhimurium (strain SL1344) OX=216597 GN=SL1344_0163 PE=4 SV=1	1	15	15	15	13	12	9	5	3	2	1	1	0	0	0	0	0	0	0	0	0	0	0	0	1	2	2	5	7	3	1	1	1	0	1	0	1	1	1	0	0	0	0	0
A0A0H3NHD1	A0A0H3NHD1	17	17	17	tr|A0A0H3NHD1|A0A0H3NHD1_SALTS UTP--glucose-1-phosphate uridylyltransferase OS=Salmonella typhimurium (strain SL1344) OX=216597 GN=galU PE=3 SV=1	1	17	17	17	14	15	16	15	15	14	12	9	7	5	5	1	0	0	1	0	0	0	0	0	0	5	4	8	16	5	5	5	4	3	3	2	2	1	1	0	1	0	0	0
A0A0H3NHD2	A0A0H3NHD2	7	7	7	tr|A0A0H3NHD2|A0A0H3NHD2_SALTS Hypothetical secreted protein OS=Salmonella typhimurium (strain SL1344) OX=216597 GN=yibN PE=4 SV=1	1	7	7	7	0	0	0	0	0	0	0	0	0	1	1	2	2	2	4	4	4	2	1	1	6	1	0	0	0	0	0	0	0	0	0	0	0	0	0	0	1	1	1	2
A0A0H3NHD3	A0A0H3NHD3	2	2	2	tr|A0A0H3NHD3|A0A0H3NHD3_SALTS Hypothetical sugar kinase OS=Salmonella typhimurium (strain SL1344) OX=216597 GN=SL1344_3646 PE=4 SV=1	1	2	2	2	1	2	1	0	0	0	0	0	0	0	0	0	0	0	0	0	0	0	0	0	0	0	0	0	0	0	0	0	0	0	0	0	0	0	0	0	0	0	0	0
A0A0H3NHD4	A0A0H3NHD4	15	15	15	tr|A0A0H3NHD4|A0A0H3NHD4_SALTS L-threonine 3-dehydrogenase OS=Salmonella typhimurium (strain SL1344) OX=216597 GN=tdh PE=3 SV=1	1	15	15	15	2	10	14	15	15	13	13	13	10	11	8	4	5	1	0	0	0	0	0	0	0	5	1	8	15	12	11	8	7	8	7	4	5	3	4	2	1	1	0	0
A0A0H3NHD5	A0A0H3NHD5	22	22	22	tr|A0A0H3NHD5|A0A0H3NHD5_SALTS Mannitol-1-phosphate 5-dehydrogenase OS=Salmonella typhimurium (strain SL1344) OX=216597 GN=mtlD PE=3 SV=1	1	22	22	22	20	18	17	14	12	9	6	3	1	0	0	0	0	0	0	0	0	0	0	0	0	1	8	5	16	5	4	2	1	1	1	1	0	0	0	0	0	0	0	0
A0A0H3NHD6	A0A0H3NHD6	3	3	3	tr|A0A0H3NHD6|A0A0H3NHD6_SALTS Uncharacterized protein OS=Salmonella typhimurium (strain SL1344) OX=216597 GN=yacC PE=4 SV=1	1	3	3	3	0	2	2	1	2	2	1	0	0	0	0	0	0	0	0	0	0	0	0	0	0	0	0	1	2	1	1	1	0	0	0	0	0	0	0	0	0	0	0	0
A0A0H3NHD8	A0A0H3NHD8	2	2	2	tr|A0A0H3NHD8|A0A0H3NHD8_SALTS O-antigen ligase OS=Salmonella typhimurium (strain SL1344) OX=216597 GN=rfaL PE=4 SV=1	1	2	2	2	0	0	0	0	0	0	0	0	0	0	0	0	0	0	0	0	0	0	0	0	2	0	0	0	0	0	0	0	0	0	0	0	0	0	0	0	0	0	0	0
A0A0H3NHE0	A0A0H3NHE0	9	9	9	tr|A0A0H3NHE0|A0A0H3NHE0_SALTS Hypothetical ABC transporter ATP-binding protein OS=Salmonella typhimurium (strain SL1344) OX=216597 GN=yadG PE=4 SV=1	1	9	9	9	3	2	0	0	0	0	3	7	7	6	4	2	0	0	0	0	0	0	0	0	1	1	2	2	1	0	0	0	2	2	2	2	1	1	0	0	0	0	0	0
A0A0H3NHE1	A0A0H3NHE1	13	13	13	tr|A0A0H3NHE1|A0A0H3NHE1_SALTS Lipopolysaccharide 1,3-galactosyltransferase OS=Salmonella typhimurium (strain SL1344) OX=216597 GN=rfaI PE=4 SV=1	1	13	13	13	1	5	6	5	7	5	5	6	6	6	5	4	3	2	1	0	0	1	0	1	3	2	1	2	6	4	4	4	4	3	4	4	3	3	2	2	1	1	0	0
A0A0H3NHE2	A0A0H3NHE2	3	3	3	tr|A0A0H3NHE2|A0A0H3NHE2_SALTS Nitrite extrusion protein (Nitrite facilitator) OS=Salmonella typhimurium (strain SL1344) OX=216597 GN=narK PE=4 SV=1	1	3	3	3	0	0	0	0	0	0	0	0	0	0	0	0	0	0	0	0	0	0	0	0	2	0	0	0	0	0	0	0	0	0	0	0	0	0	0	0	0	0	0	0
A0A0H3NHE3	A0A0H3NHE3	2	2	2	tr|A0A0H3NHE3|A0A0H3NHE3_SALTS Hypothetical lacI family transcriptional regulator regulator OS=Salmonella typhimurium (strain SL1344) OX=216597 GN=SL1344_3661 PE=4 SV=1	1	2	2	2	0	1	0	0	0	0	0	0	0	0	0	1	0	0	0	0	0	0	0	0	0	0	0	0	0	0	0	0	0	0	0	0	0	0	0	0	0	0	0	0
A0A0H3NHE5	A0A0H3NHE5	12	12	12	tr|A0A0H3NHE5|A0A0H3NHE5_SALTS Glycerol-3-phosphate dehydrogenase [NAD(P)+] OS=Salmonella typhimurium (strain SL1344) OX=216597 GN=gpsA PE=3 SV=1	1	12	12	12	11	10	9	6	6	4	4	4	3	2	2	1	1	0	0	0	0	2	1	0	4	2	3	4	6	2	1	0	0	0	0	0	1	1	0	0	0	0	1	0
A0A0H3NHE6	A0A0H3NHE6	12	12	12	tr|A0A0H3NHE6|A0A0H3NHE6_SALTS Lipopolysaccharide core biosynthesis protein OS=Salmonella typhimurium (strain SL1344) OX=216597 GN=rfaQ PE=4 SV=1	1	12	12	12	0	3	5	6	6	5	6	6	6	6	5	2	4	1	2	2	4	6	4	1	8	1	0	0	2	2	1	1	1	3	0	2	1	0	0	0	0	1	1	3
A0A0H3NHE7	A0A0H3NHE7	4	4	4	tr|A0A0H3NHE7|A0A0H3NHE7_SALTS Cation transport regulator ChaB OS=Salmonella typhimurium (strain SL1344) OX=216597 GN=chaB PE=4 SV=1	1	4	4	4	4	3	3	1	0	0	0	0	0	0	0	0	0	0	0	0	0	0	0	0	0	0	0	0	2	0	0	0	0	0	0	0	0	0	0	0	0	0	0	0
A0A0H3NHE8	A0A0H3NHE8	4	4	4	tr|A0A0H3NHE8|A0A0H3NHE8_SALTS Uncharacterized protein OS=Salmonella typhimurium (strain SL1344) OX=216597 GN=yibP PE=4 SV=1	1	4	4	4	0	0	0	0	0	0	0	0	1	0	1	0	0	0	0	0	0	0	0	0	1	0	0	0	0	0	0	0	0	0	0	0	0	0	0	0	0	0	0	0
A0A0H3NHE9	A0A0H3NHE9	10	10	10	tr|A0A0H3NHE9|A0A0H3NHE9_SALTS 3-methyl-2-oxobutanoate hydroxymethyltransferase OS=Salmonella typhimurium (strain SL1344) OX=216597 GN=panB PE=3 SV=1	1	10	10	10	0	0	3	7	8	7	6	6	5	4	2	0	0	0	0	0	0	0	0	0	0	2	0	0	4	5	7	7	6	4	4	1	1	1	1	1	1	0	0	0
A0A0H3NHF0	A0A0H3NHF0	18	18	18	tr|A0A0H3NHF0|A0A0H3NHF0_SALTS 50S ribosomal protein L28 OS=Salmonella typhimurium (strain SL1344) OX=216597 GN=rpmB PE=3 SV=1	1	18	18	18	0	2	1	3	4	5	6	8	9	9	9	5	10	6	8	6	8	14	12	5	9	4	0	0	1	0	0	1	2	2	2	2	2	3	4	7	7	9	9	13
A0A0H3NHF1	A0A0H3NHF1	1	1	1	tr|A0A0H3NHF1|A0A0H3NHF1_SALTS Release factor glutamine methyltransferase OS=Salmonella typhimurium (strain SL1344) OX=216597 GN=hemK PE=3 SV=1	1	1	1	1	1	0	0	0	0	0	0	0	0	0	0	0	0	0	0	0	0	0	0	0	0	0	0	0	0	0	0	0	0	0	0	0	0	0	0	0	0	0	0	0
A0A0H3NHF2	A0A0H3NHF2	27	27	27	tr|A0A0H3NHF2|A0A0H3NHF2_SALTS ADP-L-glycero-D-manno-heptose-6-epimerase OS=Salmonella typhimurium (strain SL1344) OX=216597 GN=rfaD PE=3 SV=1	1	27	27	27	5	10	21	23	24	22	21	19	16	12	11	3	4	1	2	2	0	0	0	0	0	5	1	5	20	14	14	15	13	8	6	5	3	3	2	2	3	0	0	1
A0A0H3NHF3	A0A0H3NHF3	14	14	14	tr|A0A0H3NHF3|A0A0H3NHF3_SALTS Orotate phosphoribosyltransferase OS=Salmonella typhimurium (strain SL1344) OX=216597 GN=pyrE PE=3 SV=1	1	14	14	14	13	14	11	10	8	4	5	2	0	0	0	0	0	0	0	0	0	0	0	0	0	4	5	5	12	5	3	1	0	0	0	0	0	0	0	0	0	0	0	0
A0A0H3NHF4	A0A0H3NHF4	7	7	7	tr|A0A0H3NHF4|A0A0H3NHF4_SALTS Sugar fermentation stimulation protein A OS=Salmonella typhimurium (strain SL1344) OX=216597 GN=sfsA PE=3 SV=1	1	7	7	7	3	3	4	3	3	4	4	2	0	0	0	0	0	0	0	0	0	0	0	0	0	0	0	1	2	0	1	0	0	0	0	0	0	0	0	0	0	0	0	0
A0A0H3NHF6	A0A0H3NHF6	22	22	22	tr|A0A0H3NHF6|A0A0H3NHF6_SALTS Ribose-phosphate pyrophosphokinase OS=Salmonella typhimurium (strain SL1344) OX=216597 GN=prs PE=3 SV=1	1	22	22	22	14	14	13	13	18	19	18	19	18	17	17	12	15	11	9	5	6	6	4	2	10	12	4	8	14	10	14	18	19	19	15	14	11	8	6	5	5	3	2	1
A0A0H3NHF8	A0A0H3NHF8	9	9	9	tr|A0A0H3NHF8|A0A0H3NHF8_SALTS RecBCD enzyme subunit RecC OS=Salmonella typhimurium (strain SL1344) OX=216597 GN=recC PE=3 SV=1	1	9	9	9	0	0	0	3	3	2	2	1	2	0	0	0	0	0	0	0	0	0	0	0	0	0	0	0	0	0	0	1	2	3	2	0	0	0	0	0	0	0	0	0
A0A0H3NHG1	A0A0H3NHG1	4	4	4	tr|A0A0H3NHG1|A0A0H3NHG1_SALTS tRNA (guanosine(18)-2-O)-methyltransferase OS=Salmonella typhimurium (strain SL1344) OX=216597 GN=spoU PE=3 SV=1	1	4	4	4	2	4	3	1	2	1	1	1	1	1	0	0	0	0	0	0	0	0	0	0	0	0	0	0	1	0	0	0	0	0	0	0	0	0	0	0	0	0	0	0
A0A0H3NHG2	A0A0H3NHG2	9	9	9	tr|A0A0H3NHG2|A0A0H3NHG2_SALTS Phosphopantetheine adenylyltransferase OS=Salmonella typhimurium (strain SL1344) OX=216597 GN=coaD PE=3 SV=1	1	9	9	9	0	5	5	5	3	2	1	1	1	0	0	0	0	0	0	0	0	0	0	0	0	2	0	3	6	4	3	4	2	0	0	0	0	0	0	0	0	0	0	0
A0A0H3NHG3	A0A0H3NHG3	7	7	7	tr|A0A0H3NHG3|A0A0H3NHG3_SALTS Uncharacterized protein OS=Salmonella typhimurium (strain SL1344) OX=216597 GN=SL1344_1713 PE=4 SV=1	1	7	7	7	1	2	4	1	0	0	0	0	0	0	0	0	0	0	0	0	0	0	0	0	0	1	0	1	4	3	1	0	0	0	0	0	1	1	1	1	1	1	1	0
A0A0H3NHG4	A0A0H3NHG4	11	11	11	tr|A0A0H3NHG4|A0A0H3NHG4_SALTS Thymidylate synthase OS=Salmonella typhimurium (strain SL1344) OX=216597 GN=thyA PE=3 SV=1	1	11	11	11	9	9	10	8	6	5	4	4	1	1	1	0	0	0	0	0	0	0	0	0	0	1	5	6	10	7	2	1	2	2	1	0	0	0	0	0	0	0	0	0
A0A0H3NHG5	A0A0H3NHG5	10	10	10	tr|A0A0H3NHG5|A0A0H3NHG5_SALTS Hypothetical exported protein OS=Salmonella typhimurium (strain SL1344) OX=216597 GN=yicH PE=4 SV=1	1	10	10	10	0	0	0	0	0	0	0	0	0	0	0	1	1	1	1	0	0	0	0	0	6	0	0	0	0	0	0	0	1	1	1	1	1	0	0	0	0	0	0	0
A0A0H3NHG6	A0A0H3NHG6	23	23	23	tr|A0A0H3NHG6|A0A0H3NHG6_SALTS Coenzyme A biosynthesis bifunctional protein CoaBC OS=Salmonella typhimurium (strain SL1344) OX=216597 GN=dfp PE=3 SV=1	1	23	23	23	0	0	0	12	18	20	16	16	15	12	8	2	3	0	0	0	0	0	0	0	0	6	0	0	0	8	13	16	16	12	10	8	3	3	3	1	1	0	0	0
A0A0H3NHH1	A0A0H3NHH1	18	18	18	tr|A0A0H3NHH1|A0A0H3NHH1_SALTS Uncharacterized protein OS=Salmonella typhimurium (strain SL1344) OX=216597 GN=yicC PE=4 SV=1	1	18	18	18	0	1	10	16	15	15	16	9	6	4	4	0	1	0	0	0	0	0	0	0	1	2	0	1	11	3	3	3	3	3	1	1	0	0	0	0	0	0	0	0
A0A0H3NHH2	A0A0H3NHH2	3	3	3	tr|A0A0H3NHH2|A0A0H3NHH2_SALTS Hypothetical inner membrane protein OS=Salmonella typhimurium (strain SL1344) OX=216597 GN=cigR PE=4 SV=1	1	3	3	3	3	3	1	0	0	0	0	0	0	0	0	0	0	0	0	0	0	0	0	0	0	1	2	2	1	0	0	0	0	0	0	0	0	0	0	0	0	0	0	0
A0A0H3NHH4	A0A0H3NHH4	10	10	10	tr|A0A0H3NHH4|A0A0H3NHH4_SALTS Guanylate kinase OS=Salmonella typhimurium (strain SL1344) OX=216597 GN=gmk PE=3 SV=1	1	10	10	10	8	9	7	6	4	4	3	2	2	1	1	0	0	0	0	0	0	0	0	0	0	4	5	5	8	5	3	1	0	0	0	0	0	0	0	0	0	0	0	0
A0A0H3NHH5	A0A0H3NHH5	5	5	5	tr|A0A0H3NHH5|A0A0H3NHH5_SALTS Possible regulatory protein OS=Salmonella typhimurium (strain SL1344) OX=216597 GN=SL1344_2990 PE=4 SV=1	1	5	5	5	0	0	0	0	0	3	3	2	1	1	0	0	0	0	0	0	0	0	0	0	0	0	0	0	0	0	0	0	0	0	0	0	0	0	0	0	0	0	0	0
A0A0H3NHH6	A0A0H3NHH6	25	25	25	tr|A0A0H3NHH6|A0A0H3NHH6_SALTS Periplasmic trehalase OS=Salmonella typhimurium (strain SL1344) OX=216597 GN=treA PE=3 SV=1	1	25	25	25	21	23	19	17	15	14	13	7	5	3	3	1	0	0	0	0	0	0	0	0	0	4	5	6	20	6	3	3	4	3	3	3	1	3	1	1	2	0	0	0
A0A0H3NHH9	A0A0H3NHH9	5	5	5	tr|A0A0H3NHH9|A0A0H3NHH9_SALTS 2-keto-3-deoxygluconate oxidoreductase OS=Salmonella typhimurium (strain SL1344) OX=216597 GN=kduD PE=3 SV=1	1	5	5	5	0	3	3	3	2	0	0	0	0	0	0	0	0	0	0	0	0	0	0	0	0	0	0	1	1	1	1	0	0	0	0	0	0	0	0	0	0	0	0	0
A0A0H3NHI0	A0A0H3NHI0	10	10	10	tr|A0A0H3NHI0|A0A0H3NHI0_SALTS Deoxyguanosinetriphosphate triphosphohydrolase OS=Salmonella typhimurium (strain SL1344) OX=216597 GN=dgt PE=3 SV=1	1	10	10	10	0	2	2	3	7	7	7	8	7	4	4	0	2	0	1	0	0	0	0	0	0	0	0	0	0	0	0	0	0	1	0	0	0	0	0	0	0	0	0	0
A0A0H3NHI3	A0A0H3NHI3	3	3	3	tr|A0A0H3NHI3|A0A0H3NHI3_SALTS K(+)/H(+) antiporter NhaP2 OS=Salmonella typhimurium (strain SL1344) OX=216597 GN=cvrA PE=3 SV=1	1	3	3	3	0	0	1	1	1	1	1	1	0	0	0	0	0	0	0	0	0	0	0	0	2	0	0	0	0	0	0	0	0	0	0	0	0	0	0	0	0	0	0	0
A0A0H3NHI4	A0A0H3NHI4	2	2	2	tr|A0A0H3NHI4|A0A0H3NHI4_SALTS Hypothetical DNA-binding protein OS=Salmonella typhimurium (strain SL1344) OX=216597 GN=SL1344_3744 PE=4 SV=1	1	2	2	2	2	1	0	0	0	0	1	0	0	0	0	0	0	0	0	0	0	0	0	0	0	0	0	0	0	0	0	0	0	0	0	0	0	0	0	0	0	0	0	0
A0A0H3NHI7	A0A0H3NHI7	24	24	24	tr|A0A0H3NHI7|A0A0H3NHI7_SALTS 2,3,4,5-tetrahydropyridine-2,6-dicarboxylate N-succinyltransferase OS=Salmonella typhimurium (strain SL1344) OX=216597 GN=dapD PE=3 SV=1	1	24	24	24	17	18	17	17	16	19	16	13	12	9	8	0	2	0	0	0	0	0	0	0	0	8	11	13	20	14	10	9	8	5	4	4	4	2	0	1	1	1	1	0
A0A0H3NHJ2	A0A0H3NHJ2	14	14	14	tr|A0A0H3NHJ2|A0A0H3NHJ2_SALTS Uridylate kinase OS=Salmonella typhimurium (strain SL1344) OX=216597 GN=pyrH PE=3 SV=1	1	14	14	14	1	10	13	14	14	11	7	5	5	2	2	0	1	0	1	1	0	0	0	0	0	6	0	5	13	7	7	7	4	4	1	1	0	0	0	0	0	0	0	0
A0A0H3NHJ3	A0A0H3NHJ3	2	2	2	tr|A0A0H3NHJ3|A0A0H3NHJ3_SALTS UPF0260 protein YcgN OS=Salmonella typhimurium (strain SL1344) OX=216597 GN=ycgN PE=3 SV=1	1	2	2	2	2	2	2	0	0	0	0	0	0	0	0	0	0	0	0	0	0	0	0	0	0	0	0	0	1	0	0	0	0	0	0	0	0	0	0	0	0	0	0	0
A0A0H3NHJ4	A0A0H3NHJ4	5	5	5	tr|A0A0H3NHJ4|A0A0H3NHJ4_SALTS Hypothetical secreted protein OS=Salmonella typhimurium (strain SL1344) OX=216597 GN=SL1344_3739 PE=4 SV=1	1	5	5	5	5	5	3	0	1	0	1	0	0	0	0	0	0	0	0	0	0	0	0	0	0	0	0	0	2	0	0	0	0	0	0	0	0	0	0	0	0	0	0	0
A0A0H3NHJ6	A0A0H3NHJ6	3	3	3	tr|A0A0H3NHJ6|A0A0H3NHJ6_SALTS Zinc metalloprotease OS=Salmonella typhimurium (strain SL1344) OX=216597 GN=yaeL PE=3 SV=1	1	3	3	3	0	0	0	0	0	0	0	0	0	0	0	0	0	0	0	0	0	0	0	0	3	0	0	0	0	0	0	0	0	0	0	0	0	0	0	0	0	0	0	0
A0A0H3NHJ7	A0A0H3NHJ7	2	2	2	tr|A0A0H3NHJ7|A0A0H3NHJ7_SALTS Hypothetical fructose-1,6-bisphosphate aldolase, class II OS=Salmonella typhimurium (strain SL1344) OX=216597 GN=SL1344_3746 PE=3 SV=1	1	2	2	2	0	0	0	0	0	0	0	0	0	0	0	0	0	0	0	0	0	0	0	0	0	0	0	0	0	0	0	0	0	1	1	0	0	0	0	0	0	0	0	0
A0A0H3NHJ8	A0A0H3NHJ8	16	16	16	tr|A0A0H3NHJ8|A0A0H3NHJ8_SALTS Cell division topological specificity factor OS=Salmonella typhimurium (strain SL1344) OX=216597 GN=minE PE=3 SV=1	1	16	16	16	15	15	13	8	5	6	4	4	5	3	4	1	1	1	1	1	0	1	1	2	4	7	9	10	14	8	6	5	5	5	4	4	5	1	2	1	0	0	2	2
A0A0H3NHJ9	A0A0H3NHJ9	4	4	4	tr|A0A0H3NHJ9|A0A0H3NHJ9_SALTS Isopentenyl-diphosphate Delta-isomerase OS=Salmonella typhimurium (strain SL1344) OX=216597 GN=idi PE=3 SV=1	1	4	4	4	3	3	2	1	1	0	0	0	0	0	0	0	0	0	0	0	0	0	0	0	0	0	1	0	2	0	0	0	0	0	0	0	0	0	0	0	0	0	0	0
A0A0H3NHK0	A0A0H3NHK0	2	2	2	tr|A0A0H3NHK0|A0A0H3NHK0_SALTS Hypothetical IIB component of PTS system OS=Salmonella typhimurium (strain SL1344) OX=216597 GN=SL1344_3749 PE=4 SV=1	1	2	2	2	2	1	1	0	0	0	0	0	0	0	0	0	0	0	0	0	0	0	0	0	0	1	2	2	1	0	0	0	0	1	1	0	0	0	0	0	0	0	0	0
A0A0H3NHK2	A0A0H3NHK2	6	6	6	tr|A0A0H3NHK2|A0A0H3NHK2_SALTS Hypothetical GntR-family transcriptional regulator OS=Salmonella typhimurium (strain SL1344) OX=216597 GN=SL1344_3751 PE=4 SV=1	1	6	6	6	1	1	1	1	1	1	0	1	0	0	0	0	0	0	0	0	0	0	0	0	0	2	0	0	1	0	0	0	0	0	0	0	0	0	0	0	0	0	0	0
A0A0H3NHK3	A0A0H3NHK3	16	16	16	tr|A0A0H3NHK3|A0A0H3NHK3_SALTS Acyl-[acyl-carrier-protein]--UDP-N-acetylglucosamine O-acyltransferase OS=Salmonella typhimurium (strain SL1344) OX=216597 GN=lpxA PE=3 SV=1	1	16	16	16	12	14	14	14	13	10	9	7	6	5	6	1	1	1	1	1	0	0	0	0	0	2	3	5	13	5	6	4	3	2	2	0	0	0	1	0	0	0	0	0
[truncated: 1,366 more rows]
[truncated: 424 more columns]

## Sheet: RELEVANT_DATA WITH CALCS
UniprotID	unique peptides	locus	gene	protein	Pfam	Mass	GO-term	class easy	class	iBAQ fraction 1	iBAQ fraction 2	iBAQ fraction 3	iBAQ fraction 4	iBAQ fraction 5	iBAQ fraction 6	iBAQ fraction 7	iBAQ fraction 8	iBAQ fraction 9	iBAQ fraction 10	iBAQ fraction 11	iBAQ fraction 12	iBAQ fraction 13	iBAQ fraction 14	iBAQ fraction 15	iBAQ fraction 16	iBAQ fraction 17	iBAQ fraction 18	iBAQ fraction 19	iBAQ fraction 20	iBAQ fraction P	iBAQ fraction 1R	iBAQ fraction 2R	iBAQ fraction 3R	iBAQ fraction 4R	iBAQ fraction 5R	iBAQ fraction 6R	iBAQ fraction 7R	iBAQ fraction 8R	iBAQ fraction 9R	iBAQ fraction 10R	iBAQ fraction 11R	iBAQ fraction 12R	iBAQ fraction 13R	iBAQ fraction 14R	iBAQ fraction 15R	iBAQ fraction 16R	iBAQ fraction 17R	iBAQ fraction 18R	iBAQ fraction 19R
[truncated: 2,588 more rows]
[truncated: 248 more columns]
