# Supplementary material
Source: HighWire-hosted journal article supplement (doi:10.1101/rna.076992.120)
Supplement: Supplemental_Table_S2.xlsx [file Supplemental_Table_S2.xlsx]

## Sheet: table
locus	gene	strand	class	start	stop	log2_base-mean	log2fold-change
Inc	Inc	sense	sRNA	291	368	17.4303	4.90388
STnc1590	STnc1590	sense	sRNA	3633247	3633424	13.7474	5.7021
STnc1580	STnc1580	anti-sense	sRNA	3633254	3633328	13.7345	5.8277
YP_005180051.1	leu operon leader peptide;protein	sense	CDS	133829	133915	13.352	5.00766
STnc520	STnc520	sense	sRNA	1290590	1290674	13.1672	3.22975
leuL	leuL	sense	5UTR	133916	133941	13.0226	5.17481
YP_006203734.1	YP	sense	CDS	92242	92487	13.0119	2.99405
STnc1160	STnc1160	sense	sRNA	2760372	2760451	12.9778	3.21923
SL1344_2578		sense	5UTR	2760317	2760416	12.9628	3.25342
YP_005182198.1	putative aminotransferase;protein	sense	CDS	2439711	2440925	12.9006	2.21906
YP_006203575.1	YP	anti-sense	CDS	41782	42066	12.8183	3.76821
pndCrevCDS	pndCrevCDS	sense	sRNA	41810	41870	12.8089	3.81014
trpS2	trpS2	sense	5UTR	4783423	4783583	12.8031	5.09515
YP_005181293.1	glutathione S-transferase;protein	anti-sense	CDS	1482592	1483197	12.6934	2.42619
IsrQ	IsrQ	anti-sense	sRNA	4783574	4783741	12.4415	5.24992
traGrevCDS	traGrevCDS	sense	sRNA	65820	65973	12.3757	3.13234
flgN	flgN	sense	3UTR	1212661	1212760	11.9545	3.97697
mviN	mviN	anti-sense	3UTR	1212680	1212779	11.9537	3.90941
YP_005180677.1	molybdenum transport system permease protein ModB;protein	sense	CDS	845702	846391	11.6421	2.22275
moaA	moaA	sense	5UTR	869761	869892	11.6092	4.41272
YP_005184272.1	putative inner membrane protein;protein	sense	CDS	4742937	4744037	11.5613	2.46045
STnc1710	STnc1710	sense	sRNA	932197	932336	11.5315	2.04712
YP_005183071.1	30S ribosomal protein S21;protein	sense	CDS	3394760	3394975	11.4615	2.29025
RUF_107c.8	RUF	anti-sense	sRNA	1212658	1212715	11.4319	4.18893
dps	dps	sense	3UTR	896648	896747	11.4149	3.48294
YP_005182518.1	ftsH suppressor protein SfhB;protein	sense	CDS	2805960	2806940	11.348	2.01026
YP_005181407.1	CDS;product	sense	CDS	1607295	1609754	11.2882	2.21321
AmgR	AmgR	anti-sense	sRNA	3985659	3986858	11.2255	4.93329
mgtC	mgtC	sense	5UTR	3986498	3986780	11.2076	5.08428
YP_005180126.1	penicillin-binding protein 1b%3B peptidoglycan synthetase;protein	sense	CDS	220920	223442	11.1726	2.06207
SL1344_2578		sense	3UTR	2759653	2759752	11.1194	4.42079
IsrJ	IsrJ	sense	sRNA	2759644	2759718	11.1189	4.42021
hisG	hisG	sense	5UTR	2147230	2147329	11.013	4.15626
accD	accD	sense	5UTR	2477321	2477402	10.9415	3.83926
STnc1460	STnc1460	sense	sRNA	4403810	4404049	10.862	2.01035
YP_005182967.1	hypothetical protein;protein	sense	CDS	3283231	3283824	10.7136	4.91969
SL1344_4442		sense	5UTR	4786558	4786583	10.6169	2.81852
SL1344_1218		sense	5UTR	1316632	1316658	10.5774	2.23731
ptsH	ptsH	sense	5UTR	2541849	2542301	10.5095	2.40765
YP_005182291.1	cysteine synthase A;protein	sense	CDS	2540947	2541918	10.4447	2.36558
YP_005184119.1	nonspecific acid phosphatase;protein	sense	CDS	4584169	4584921	10.24	2.86528
YP_005180403.1	hypothetical protein;protein	sense	CDS	542369	542698	10.118	3.01169
YP_005180941.1	inner membrane protein;protein	anti-sense	CDS	1133859	1134185	10.0834	2.1385
RUF_219c	RUF	sense	sRNA	3034326	3034476	10.0725	2.25224
pipC	pipC	sense	3UTR	1134095	1134194	10.0569	2.23338
YP_005183038.1	AraC family transcriptional regulator;protein	sense	CDS	3360020	3360886	9.99295	2.24558
fnr	fnr	sense	3UTR	1711980	1712079	9.82605	3.43026
SL1344_0406		sense	3UTR	466395	466611	9.82259	2.92939
YP_005183171.1	ABC transporter ATP-binding protein;protein	sense	CDS	3500363	3501175	9.81384	2.71326
YP_005181452.1	hypothetical protein;protein	anti-sense	CDS	1661385	1662191	9.77563	2.39407
SL1344_0211		anti-sense	3UTR	247226	247325	9.68684	3.32633
udg	udg	sense	5UTR	2156840	2156959	9.66886	2.98889
SL1344_1878		anti-sense	3UTR	1997160	1997259	9.64529	3.40948
sdiA	sdiA	sense	3UTR	1997152	1997225	9.62612	3.47077
YP_005181067.1	ABC transporter;protein	sense	CDS	1258821	1260020	9.51987	2.43733
YP_005179941.1	thr operon leader peptide;protein	sense	CDS	169	255	9.50736	2.56715
SL1344_0212		sense	3UTR	247214	247313	9.49604	3.21853
YP_005180695.1	hypothetical protein;protein	anti-sense	CDS	868588	869496	9.3653	2.51733
YP_005183539.1	putative L-lactate dehydrogenase;protein	anti-sense	CDS	3909652	3910842	9.3578	4.09834
YP_005183534.1	hypothetical protein;protein	sense	CDS	3900964	3901326	9.30947	2.49256
ybjG	ybjG	sense	5UTR	937444	937590	9.28924	2.57527
rpiA	rpiA	sense	3UTR	3245397	3245496	9.25649	3.00582
YP_005180220.1	Rhs family protein;protein	sense	CDS	332521	336123	9.24888	2.07424
SLnc0035	SLnc0035	sense	sRNA	3924034	3924166	9.13782	2.12473
STnc490b	STnc490b	sense	sRNA	1270920	1271007	9.09923	2.32848
YP_005181078.1	putative transposase;protein	anti-sense	CDS	1270948	1271457	9.0939	2.3444
YP_005180540.1	hypothetical protein;protein	sense	CDS	692670	693053	9.09015	2.52748
fhlA	fhlA	sense	5UTR	3026067	3026280	9.0512	2.58271
YP_005181780.1	transposase;protein	anti-sense	CDS	2003303	2003812	9.03752	2.36899
STnc490d	STnc490d	sense	sRNA	2003753	2003840	9.03516	2.36618
SL1344_1301		sense	3UTR	1407107	1407381	9.02617	2.02671
ompF	ompF	sense	5UTR	1047440	1047551	8.98289	3.50871
YP_005181023.1	flagellar basal body P-ring protein FlgA;protein	sense	CDS	1213573	1214232	8.93025	2.07832
YP_005183262.1	large-conductance mechanosensitive channel;protein	sense	CDS	3602771	3603184	8.91619	2.01662
ubiG	ubiG	sense	3UTR	2378761	2378860	8.86509	3.62215
tdcA	tdcA	sense	5UTR	3434117	3434145	8.84006	3.64795
YP_005182617.1	bacteriophage P4 DNA primase;protein	anti-sense	CDS	2897858	2900242	8.83559	2.38165
rfaQ	rfaQ	sense	5UTR	3940208	3940349	8.73046	2.01898
SL1344_3267		anti-sense	5UTR	3485896	3485995	8.68276	2.22562
SL1344_1746		anti-sense	5UTR	1872597	1872789	8.67941	2.24999
STnc490g	STnc490g	sense	sRNA	3657129	3657216	8.67865	2.24908
STnc490f	STnc490f	sense	sRNA	3485887	3485974	8.67865	2.24908
STnc490c	STnc490c	sense	sRNA	1872588	1872675	8.67865	2.24908
tnp	tnp	anti-sense	5UTR	981603	981702	8.6779	2.24816
STnc490e	STnc490e	sense	sRNA	2577497	2577584	8.6779	2.24816
STnc490a	STnc490a	sense	sRNA	981624	981711	8.6779	2.24816
SL1344_3446		anti-sense	5UTR	3657138	3657237	8.6779	2.24816
SL1344_2434		anti-sense	5UTR	2577506	2577605	8.6779	2.24816
YP_005182525.1	hypothetical protein;protein	sense	CDS	2813398	2813916	8.65068	2.0758
YP_005183130.1	hypothetical protein;protein	sense	CDS	3459436	3459753	8.63137	4.6512
YP_005181540.1	hypothetical protein;protein	sense	CDS	1755466	1755678	8.62969	3.03024
rplQ	rplQ	sense	3UTR	3604310	3604358	8.62968	5.79552
recF	recF	anti-sense	5UTR	4063686	4063748	8.6232	4.76262
YP_005180986.1	hypothetical protein;protein	anti-sense	CDS	1182228	1182965	8.59708	2.03663
SL1344_2206		anti-sense	3UTR	2328547	2328676	8.58452	5.74954
YP_005180058.1	cell division protein FtsL;protein	anti-sense	CDS	141348	141713	8.5453	2.84899
SLnc1021	SLnc1021	sense	sRNA	2586881	2587099	8.52674	4.43056
SL1344_1593		anti-sense	3UTR	1713032	1713131	8.5231	2.701
rpmA	rpmA	sense	3UTR	3493854	3493917	8.5188	4.53397
RdlE	RdlE	sense	sRNA	466718	466783	8.5161	2.10934
SLnc1022	SLnc1022	anti-sense	sRNA	2586916	2587100	8.51289	4.5278
SL1344_1244		anti-sense	3UTR	1345870	1345969	8.5057	3.64801
SL1344_1243		sense	3UTR	1345896	1345978	8.49632	3.63788
STnc1640	STnc1640	sense	sRNA	1345903	1345970	8.49165	3.70201
SL1344_1592		sense	3UTR	1713078	1713177	8.43278	2.80726
YP_005181358.1	multiple antibiotic resistance protein MarR;protein	sense	CDS	1554350	1554784	8.42451	2.22017
YP_005183263.1	hypothetical protein;protein	anti-sense	CDS	3603120	3603389	8.40145	4.96255
symE	symE	anti-sense	5UTR	4797963	4798062	8.38952	2.21168
SymR	SymR	sense	sRNA	4797969	4798032	8.37148	2.22448
SL1344_2441		sense	3UTR	2586883	2586982	8.30644	4.43275
STnc1590	STnc1590	anti-sense	sRNA	3633247	3633424	8.27852	2.49805
hns	hns	sense	3UTR	1804550	1804602	8.27305	2.10409
aldB	aldB	sense	3UTR	3889188	3889287	8.24753	2.63947
YP_005182622.1	putative inner membrane protein;protein	anti-sense	CDS	2906066	2908135	8.24526	3.58441
STnc1580	STnc1580	sense	sRNA	3633254	3633328	8.20315	2.58784
SL1344_2441		sense	5UTR	2585409	2585583	8.16799	3.66519
YP_005184266.1	putative acetyltransferase;protein	sense	CDS	4735569	4736072	8.16514	3.42061
yghB	yghB	sense	3UTR	3343685	3343784	8.13062	2.07675
YP_005183331.1	transposase;protein	anti-sense	CDS	3656679	3657137	8.10854	2.62384
YP_005183153.1	transposase;protein	anti-sense	CDS	3485437	3485895	8.10854	2.62384
YP_005182332.1	transposase;protein	anti-sense	CDS	2577047	2577505	8.10854	2.62384
YP_005181651.1	transposase;protein	anti-sense	CDS	1872138	1872596	8.10854	2.62384
YP_005180800.1	transposase for the IS1541 insertion element;protein	anti-sense	CDS	981703	982161	8.10854	2.62384
SL1344_1502		sense	3UTR	1611502	1611601	8.08996	4.20543
YP_005182339.1	hypothetical protein;protein	sense	CDS	2585584	2586882	8.06451	2.33179
YP_005181656.1	hypothetical protein;protein	anti-sense	CDS	1878124	1878468	8.05052	2.77202
YP_005180224.1	atypical fimbria lipoprotein;protein	sense	CDS	341687	342199	8.04083	2.44489
SL1344_3644		anti-sense	3UTR	3889171	3889270	8.01266	3.33061
SL1344_1202		sense	3UTR	1305902	1306146	8.00443	2.25946
SL1344_0769		anti-sense	3UTR	857415	857514	7.99803	3.98589
galF	galF	sense	3UTR	2176563	2176671	7.98508	2.81511
YP_005182247.1	hypothetical protein;protein	sense	CDS	2489764	2490039	7.95311	2.29166
SL1344_2496		anti-sense	3UTR	2672380	2672511	7.9409	4.32533
YP_005181629.1	Periplasmic trehalase;protein	anti-sense	CDS	1851923	1853635	7.89308	2.59003
SL1344_2356		sense	5UTR	2495613	2495742	7.89175	2.03054
glk	glk	sense	3UTR	2515540	2515679	7.87226	2.68552
RUF_107c.107	RUF	anti-sense	sRNA	2515425	2515664	7.87226	2.68552
djlA	djlA	sense	5UTR	108324	108426	7.8387	3.13815
pgtP	pgtP	anti-sense	3UTR	2511238	2511337	7.82007	3.681
SL1344_1800		anti-sense	3UTR	1920944	1921043	7.81283	3.10931
pagK	pagK	sense	3UTR	1920948	1921047	7.81145	3.10778
YP_005181179.1	Threonyl-tRNA synthetase;protein	anti-sense	CDS	1369055	1370983	7.78688	3.64519
RUF_107c.57	RUF	anti-sense	sRNA	4313620	4313825	7.76767	3.31903
SL1344_3297		anti-sense	3UTR	3510230	3510329	7.76396	4.29914
mtgA	mtgA	sense	3UTR	3510204	3510303	7.75826	4.29315
dcuR	dcuR	anti-sense	3UTR	4570286	4570468	7.75799	3.72926
hmpA	hmpA	sense	3UTR	2694167	2694232	7.74601	4.12
fpr	fpr	sense	3UTR	4313715	4313814	7.7456	3.39082
STnc3970	STnc3970	sense	sRNA	3507594	3507677	7.7421	5.48683
yiiR	yiiR	anti-sense	3UTR	4313709	4313808	7.74127	3.38608
YP_005183741.1	peptidyl-prolyl cis-trans isomerase C;protein	sense	CDS	4140489	4140770	7.73358	2.17768
YP_005180410.1	putative transport protein;protein	anti-sense	CDS	549838	551514	7.72106	3.57397
YP_005180287.1	secreted protein;protein	anti-sense	CDS	415162	415437	7.68083	3.31972
SL1344_2189		sense	5UTR	2309209	2309224	7.663	2.14565
SL1344_4408		anti-sense	5UTR	4742706	4742828	7.64474	2.23689
YP_005180244.1	outer membrane pore protein E;protein	anti-sense	CDS	364458	365510	7.62554	2.39636
SL1344_4432		sense	5UTR	4776762	4776905	7.60162	2.87151
YP_005182083.1	hypothetical protein;protein	anti-sense	CDS	2310241	2310960	7.58792	2.05304
SL1344_1485		sense	5UTR	1588723	1588982	7.52885	3.60666
SL1344_4344		sense	3UTR	4672490	4672529	7.52713	2.55319
YP_006203608.1	YP	sense	CDS	72936	73496	7.51825	2.14229
SL1344_1669		anti-sense	3UTR	1789362	1789461	7.51443	2.46608
STnc880	STnc880	sense	sRNA	4486745	4486825	7.50733	2.19085
YP_005182362.1	polyphosphate kinase;protein	anti-sense	CDS	2612653	2614719	7.50321	3.12304
YP_005183896.1	putative ribulose-phosphate 3-epimerase;protein	anti-sense	CDS	4310847	4311611	7.46425	2.13815
YP_005181284.1	putative HlyD family protein;protein	sense	CDS	1475438	1476334	7.44745	2.05496
SLnc0031	SLnc0031	sense	sRNA	3543523	3543651	7.41079	2.07227
yjbO	yjbO	sense	3UTR	4486661	4486760	7.40203	2.33236
SL1344_2349		sense	5UTR	2490040	2490044	7.38704	2.89409
SL1344_1484		anti-sense	5UTR	1588725	1588785	7.37633	6.13243
YP_005180038.1	L-ribulose-5-phosphate 4-epimerase;protein	sense	CDS	117244	117939	7.32307	3.02568
YP_005181698.1	Phage Tail Assembly Protein;protein	anti-sense	CDS	1921044	1921925	7.29327	2.43234
YP_005183977.1	hypothetical protein;protein	anti-sense	CDS	4409058	4409513	7.28485	2.87737
YP_005183466.1	putative polysaccharide biosynthesis protein subunit B;protein	anti-sense	CDS	3819856	3822156	7.28031	2.33693
YP_005183662.1	TorD protein;protein	anti-sense	CDS	4041499	4042131	7.25286	4.65121
proA	proA	anti-sense	3UTR	368159	368258	7.24225	2.45526
SL1344_0695		sense	3UTR	780525	780624	7.23709	3.57555
mesJ	mesJ	anti-sense	3UTR	279959	280058	7.21547	2.42355
secA	secA	sense	3UTR	161399	161544	7.1982	2.8847
YP_005180764.1	hypothetical protein;protein	anti-sense	CDS	943926	944303	7.17832	2.13554
mdh	mdh	sense	3UTR	3548045	3548095	7.17584	2.75286
YP_005182978.1	ornithine decarboxylase%2C constitutive;protein	anti-sense	CDS	3293476	3295611	7.15291	2.43712
cysK	cysK	sense	3UTR	2541919	2541977	7.14426	3.82231
SL1344_3557		sense	3UTR	3784409	3784508	7.11617	3.02518
SL1344_3558		anti-sense	3UTR	3784400	3784499	7.11516	3.1531
murI	murI	anti-sense	3UTR	4372189	4372288	7.10462	4.22089
YP_005181391.1	hypothetical protein;protein	anti-sense	CDS	1587258	1588724	7.07618	3.95528
SL1344_2596		sense	5UTR	2770533	2770635	7.07492	3.74794
mfd	mfd	sense	5UTR	1258484	1258615	7.07109	2.08244
rof	rof	sense	3UTR	279942	280041	7.05962	3.23075
envE	envE	sense	5UTR	1287271	1287451	7.05116	2.83064
SL1344_2550		anti-sense	3UTR	2730924	2731023	7.0495	3.7206
SL1344_2549		sense	3UTR	2730928	2731027	7.04716	3.71809
alr	alr	sense	3UTR	4490410	4490509	7.0324	2.80923
parC	parC	sense	5UTR	3359910	3359957	7.03172	2.20281
YP_005184214.1	putative sugar transport protein;protein	anti-sense	CDS	4680006	4681439	7.0315	2.03334
YP_005180297.1	ABC-transporter inner membrane protein SbmA;protein	anti-sense	CDS	429947	431065	6.98237	2.05569
SL1344_4508		sense	3UTR	4857639	4857738	6.97327	2.62644
SL1344_2409		sense	3UTR	2555244	2555343	6.96429	2.30511
YP_005180827.1	hypothetical protein;protein	anti-sense	CDS	1015267	1017027	6.95074	2.38757
nadR	nadR	anti-sense	3UTR	4857622	4857721	6.9437	2.83003
potD	potD	sense	3UTR	1263720	1263819	6.92446	4.30807
RaoN	RaoN	sense	sRNA	1287312	1287455	6.92118	3.07675
YP_005181764.1	tyrosine-specific transport protein;protein	sense	CDS	1987968	1989179	6.91369	2.05781
SL1344_1967		sense	3UTR	2072940	2072988	6.89564	2.03539
rpoH	rpoH	sense	3UTR	3757191	3757248	6.89045	2.02892
cobB	cobB	anti-sense	3UTR	1263739	1263838	6.88984	4.60846
lepB	lepB	sense	3UTR	2723432	2723497	6.88175	3.98503
dinI	dinI	sense	5UTR	1204583	1204602	6.84114	2.84474
STnc1550	STnc1550	sense	sRNA	2437665	2437808	6.83128	2.46008
maa	maa	sense	5UTR	527441	527454	6.80942	2.4342
fklB	fklB	anti-sense	3UTR	4655133	4655232	6.76419	3.41117
YP_005182748.1	chaperone %28associated with virulence%29;protein	anti-sense	CDS	3046265	3046657	6.74333	2.47376
SL1344_2547		sense	3UTR	2729589	2729688	6.737	2.02712
YP_005184305.1	hypothetical protein;protein	anti-sense	CDS	4787861	4788322	6.71049	3.16462
pepE	pepE	anti-sense	3UTR	4435185	4435284	6.70543	4.8478
rfaZ	rfaZ	sense	3UTR	3932021	3932120	6.7021	2.19343
YP_005183828.1	hypothetical protein;protein	sense	CDS	4243537	4244400	6.69047	2.41117
YP_005180607.1	potassium-transporting ATPase B chain;protein	sense	CDS	769698	771746	6.66938	2.38608
YP_005182509.1	thioredoxin 2;protein	sense	CDS	2789067	2789486	6.66634	2.38246
Ig1085	Ig1085	anti-sense	sRNA	1358936	1359182	6.66634	2.38246
StyR-88	StyR-88	anti-sense	sRNA	2681155	2681263	6.66221	2.78376
SL1344_3338		sense	5UTR	3554537	3554636	6.66054	2.63711
proC	proC	sense	3UTR	438642	438741	6.6558	2.49661
