# Supplementary material
Source: HighWire-hosted journal article supplement (doi:10.1101/rna.076992.120)
Supplement: Supplemental_Table_S3.xlsx [file Supplemental_Table_S3.xlsx]

## Sheet: oligonucleotides
oligo name	sequence (5´-3´)	used for
strain creation
JVO-16667	CCCATTTTTTCTGATACGTAATGTCCACCTGTTATCAGGAGTGTATATGAATATCCTCCTTAG	sense primer for fopA 3x-FLAG-tagging via pKD46 or pSUB11, respectively. fopA was initially annotated as yafB but renamed because of a doubling with a yafB gene encoded on the genome!
JVO-16669	CAGGATGCAGGCACAGCAGGAGAATATTTCTGGGCAAGACTACAAAGACCATGACGG	anti-sense primer for fopA 3xFLAG-tagging via pSUB11
JVO-16670	CAGGATGAATAAAATCTTCTCCGCTTCTGAATC	verification primer for fopA
JVO-16671	CTCTTCCTCACTGCTAAGCTCCCGAATCAC	verification primer for fopA
JVO-11303	CGGCCACAGTCGATGAATCC	kt verification primer for Km cassette
JVO-11304	CGGTGCCCTGAATGAACTGC	k2 verification primer for Km cassette
JVO-14470	CAGTCATAGCCGAATAGCCT	k1 verification primer for Km cassette
RNA T7-transcription
JVO-16853	GTTTTTTTAATACGACTCACTATAGGGAGACCCGTATTCTGTGAGGCCCCC	5´primer for anti-sense lnc sRNA T7-transcription template amplification
JVO-16851	TAAAAGGAAAACCCCCACTATCTTTCTTACG	3´primer for anti-sense lnc sRNA T7-transcription template amplification
JVO-16847	GTTTTTTTAATACGACTCACTATAGGGAGGAGACTGAAGATGTTCCGGAAGCC	5´primer for 5´UTR repZ T7-transcription template amplification
JVO-16850	ACCCGTATTCTGTGAGGCCC	3´primer for 5´UTR repZ T7-transcription template amplification

## Sheet: plasmids
plasmid name	genotype	used for
strain creation
pSUB11	Km	template for recombination fragment for FLAG-tagging
pCP20	AmpR, temp sensitive	removal of resistance casette by FRT recomb.
T7-transcription
pMiG-002	pT7, Inc, AmpR	Inc production, created by Stratagene and JVO-16847/-50 from JVS-1574
pMiG-001	pT7, 5´UTR-repZ, AmpR	5´UTR-repZ production, created by Stratagene and JVO-16851/-3 from JVS-1574
protein production
pMiG-006	pETM14, H6-3C-fopA, Km	H6-3C-FopA production

## Sheet: strains
strain	relevant marker/genotype	reference/source
JVS-1574	wt	Stocker et al. 1983
JVS-3013	wt +pKD46	JVS-1574 was transformed with pKD46 (Datsenko & Wanner 2000) for homologuous recombination, grown at 28 °C
JVS-10132	proQ::3xFLAG::Km	Smirnov et al. 2016
JVS-10314	proQ::3xFLAG	Smirnov et al. 2016
JVS-10520	ProQ::3xFLAG::Km	in E. coli W3110, Holmqvist et al. 2018
JVS-12183	fopA-3xFLAG::Km	fopA was initially annotated as yafB but renamed because of a doubling with a yafB gene encoded on the genome! JVS-3013 (wt+pKD4) was recombined with PCR product of JVO-16667/-9, the P22 lysate was created and used for transduction of JVS-01574 (wt). Strain was verified by PCR using JVO-16670 & kt /-1.
JVS-12191	fopA-3xFLAG	JVS-12183 was healed with pCP20. Strain was verified by growth on Amp/Km/Strep and PCR using JVO-16670/-1.
JVS-12280	argU, ileY, leuW	E. coli BL21-CodonPlus (DE3)-RIL (Agilent Technologies), for protein production
